# Supplementary material for: Contemporary sex differences in mortality among patients with ST-segment elevation myocardial infarction: a systematic review and meta-analysis
Source: PubMed Central journal article supplement — BMJ Open. 2022 Mar 9;12(3):e053379. doi: 10.1136/bmjopen-2021-053379 (PMC8915368; doi:10.1136/bmjopen-2021-053379), 2022-03-09

eTable 1 Full search strategies for meta-analysis of studies reporting sex specific outcomes of patients with STEMI.

| Database         | Search strategy (publications accessible January 1, 2010 to August 1, 2020)                                                                                                                                                                                                                                                                                                                                                                                                                                                                                                                                                                                                                                                                                                                                                                                                                                              |
|------------------|--------------------------------------------------------------------------------------------------------------------------------------------------------------------------------------------------------------------------------------------------------------------------------------------------------------------------------------------------------------------------------------------------------------------------------------------------------------------------------------------------------------------------------------------------------------------------------------------------------------------------------------------------------------------------------------------------------------------------------------------------------------------------------------------------------------------------------------------------------------------------------------------------------------------------|
| PubMed           | ("gender"[Title/Abstract] OR "female"[Title/Abstract] OR "male"[Title/Abstract] OR "gender differences"[Title/Abstract] OR "sex differences"[Title/Abstract] OR "sex characteristics"[MeSH Terms]) AND ("death"[MeSH Terms] OR "mortality"[MeSH Terms] OR "hospital mortality"[MeSH Terms] OR "cardiac death"[Title/Abstract] OR "sudden cardiac death"[MeSH Terms] OR "all-cause mortality"[Title/Abstract] OR "long term mortality"[Title/Abstract] OR "one year mortality"[Title/Abstract] OR "cardiovascular mortality"[Title/Abstract] OR "short term mortality"[Title/Abstract]) AND ("myocardial infarction"[MeSH Terms] OR "acute myocardial infarction"[Title/Abstract] OR "ST Elevation Myocardial Infarction"[MeSH Terms] OR "myocardial necrosis"[Title/Abstract] OR "primary percutaneous coronary intervention"[Title/Abstract] OR "primary PCI"[Title/Abstract] OR "primary angioplasty"[Title/Abstract]) |
| EMBASE           | (gender.mp OR female.mp OR male.mp OR gender differences.mp OR sex differences.mp OR sex characteristics.mp) AND (death.mp OR mortality.mp OR hospital mortality.mp OR cardiac death.mp OR sudden cardiac death.mp OR all-cause mortality.mp OR long term mortality OR one year mortality.mp OR cardiovascular mortality.mp OR short term mortality) AND (myocardial infarction.mp OR acute myocardial infarction.mp OR ST Elevation Myocardial Infarction.mp OR myocardial necrosis.mp OR primary percutaneous coronary intervention.mp OR primary PCI.mp OR primary angioplasty.mp)                                                                                                                                                                                                                                                                                                                                    |
| Cochrane Library | [Title and abstract search] (gender OR female OR male OR gender differences OR sex differences OR sex characteristics) AND (death OR mortality OR hospital mortality OR cardiac death OR sudden cardiac death OR all-cause mortality OR long term mortality OR one year mortality OR cardiovascular mortality OR short term mortality) AND (myocardial infarction OR acute myocardial infarction OR ST Elevation Myocardial Infarction OR myocardial necrosis OR primary percutaneous coronary intervention OR primary PCI OR primary angioplasty)                                                                                                                                                                                                                                                                                                                                                                       |

eTable 2 Variables adjusted in the adjusted analyses from the included studies.

| First Author | Year | Adjusted Variables                                                                                                                                                                                                                                                                                                                                             |
|--------------|------|----------------------------------------------------------------------------------------------------------------------------------------------------------------------------------------------------------------------------------------------------------------------------------------------------------------------------------------------------------------|
| Venetsanos   | 2017 | age, weight, prior MI, prior PCI, patient's history of diabetes, hypertension, non-hemorrhagic stroke, gastrointestinal bleeding, time from symptom onset to pre-PCI ECG, admission Killip class, baseline hemoglobin, eGFR, access site, use of Glycoprotein IIb/IIIa inhibitor, bivalirudin and unfractionated heparin, location of MI and revascularization |
| Langabeer    | 2018 | age, smoking, diabetes, prior CVD, prior stroke, heart failure, shock, length of stay, teaching, insurance, total ischemic time, door to balloon                                                                                                                                                                                                               |
| Tang         | 2018 | age, BMI, LVEF, serum creatinine, use of proton pump inhibitors, use of dual-antiplatelet therapy, previous PCI, diabetes mellitus, hypertension, previous stroke, current smoker, thrombocytopenia, use of femoral approach, use of intra-aortic balloon pump, and multivessel disease                                                                        |
| Conko        | 2019 | age, family history of CAD, diabetes, hypertension, hypercholesterolemia, current smoking, former                                                                                                                                                                                                                                                              |

|                  |      |                                                                                                                                                                                                                                                                                                                                                                                                                                                                                                                                                                                                                                                                                                                                                                                                                                                                                                                                                                                                                                                                               |
|------------------|------|-------------------------------------------------------------------------------------------------------------------------------------------------------------------------------------------------------------------------------------------------------------------------------------------------------------------------------------------------------------------------------------------------------------------------------------------------------------------------------------------------------------------------------------------------------------------------------------------------------------------------------------------------------------------------------------------------------------------------------------------------------------------------------------------------------------------------------------------------------------------------------------------------------------------------------------------------------------------------------------------------------------------------------------------------------------------------------|
|                  |      | smoking, prior angina pectoris, prior myocardial infarction, prior PCI, prior CABG, peripheral artery disease, prior stroke, ST-segment elevation in anterior leads (at ECG), systolic blood pressure at baseline, heart rate at baseline, serum creatinine at baseline, Killip Class $\geq 2$                                                                                                                                                                                                                                                                                                                                                                                                                                                                                                                                                                                                                                                                                                                                                                                |
| <b>Hao</b>       | 2019 | Age, medical insurance status, acute heart failure, cardiogenic shock, cardiac arrest at admission, heart rate and systolic blood pressure, diabetes mellitus, smoking, history of CHD, heart failure, renal failure, and cerebrovascular disease, prehospital statin use, renal insufficiency, and transfer status.                                                                                                                                                                                                                                                                                                                                                                                                                                                                                                                                                                                                                                                                                                                                                          |
| <b>Hannan</b>    | 2019 | age, STEMI location, heart rate, mean arterial pressure, history of hospitalization in last year, history of PCI, history of CABG surgery, septicemia/sepsis/systemic inflammatory response /shock, metastatic cancer/acute leukemia, diabetes with acute complications, end stage liver disease, inflammatory bowel disease, coagulation defects and other specified hematological disorders, dementia, polyneuropathy, muscular dystrophy, seizure disorders and convulsions, coma/brain compression/anoxic damage, cardiorespiratory failure and shock, congestive heart failure, specified heart arrhythmias, ischemic or unspecified stroke, hemiplegia/hemiparesis, vascular disease with complications, vascular disease without complications, aspiration and specified bacterial pneumonias, acute renal failure, chronic kidney disease, Stage 5, unspecified renal failure, nephritis, pressure ulcer of skin with partial thickness skin loss*, pressure pre-ulcer skin changes, chronic ulcer of skin except pressure ulcer, lower limb/amputation complications |
| <b>Maznyczka</b> | 2019 | NA                                                                                                                                                                                                                                                                                                                                                                                                                                                                                                                                                                                                                                                                                                                                                                                                                                                                                                                                                                                                                                                                            |
| <b>Stehli</b>    | 2019 | age, diabetes mellitus, eGFR, previous PCI and/or coronary artery bypass grafting, history of peripheral vascular disease and CVD, LVEF, out-of-hospital and in-hospital cardiac arrest, cardiogenic shock, and occurrence time of symptom onset                                                                                                                                                                                                                                                                                                                                                                                                                                                                                                                                                                                                                                                                                                                                                                                                                              |
| <b>Burgess</b>   | 2020 | NA                                                                                                                                                                                                                                                                                                                                                                                                                                                                                                                                                                                                                                                                                                                                                                                                                                                                                                                                                                                                                                                                            |
| <b>Dharma</b>    | 2020 | NA                                                                                                                                                                                                                                                                                                                                                                                                                                                                                                                                                                                                                                                                                                                                                                                                                                                                                                                                                                                                                                                                            |
| <b>Kerkmanx</b>  | 2020 | NA                                                                                                                                                                                                                                                                                                                                                                                                                                                                                                                                                                                                                                                                                                                                                                                                                                                                                                                                                                                                                                                                            |
| <b>Siabani</b>   | 2020 | BMI $\geq 25$ , hypertension, diabetes, current smoking, hypercholesterolemia, congestive heart failure, Killip class (at first presentation) $\geq$ II, symptom-to-balloon time > 360 min and door-to-balloon time > 90 min                                                                                                                                                                                                                                                                                                                                                                                                                                                                                                                                                                                                                                                                                                                                                                                                                                                  |
| <b>Tai</b>       | 2020 | NA                                                                                                                                                                                                                                                                                                                                                                                                                                                                                                                                                                                                                                                                                                                                                                                                                                                                                                                                                                                                                                                                            |
| <b>Tizón</b>     | 2020 | age, diabetes mellitus, recruitment year, time from symptom onset to culprit coronary artery opening, and Killip class                                                                                                                                                                                                                                                                                                                                                                                                                                                                                                                                                                                                                                                                                                                                                                                                                                                                                                                                                        |

eTable 3 Assessment of study quality using Newcastle-Ottawa scale.

| First Author | Year | Selection                                |                                    |                                       |                                                   | Comparability | Outcome               |                                             |                       | Total points |
|--------------|------|------------------------------------------|------------------------------------|---------------------------------------|---------------------------------------------------|---------------|-----------------------|---------------------------------------------|-----------------------|--------------|
|              |      | Representativeness of the exposed cohort | Selection of the no exposed cohort | Ascertainment of exposure to implants | Outcome of interest not present at start of study |               | Assessment of outcome | Follow-up long enough for outcomes to occur | Adequacy of follow-up |              |
| Venetsanos   | 2017 | *                                        | *                                  | *                                     | *                                                 | **            | *                     | \                                           | *                     | 8            |
| Ali          | 2018 | \                                        | \                                  | *                                     | *                                                 | \             | *                     | \                                           | *                     | 4            |
| Langabeer    | 2018 | *                                        | *                                  | *                                     | *                                                 | *             | *                     | \                                           | *                     | 7            |
| Tang         | 2018 | \                                        | \                                  | *                                     | *                                                 | **            | *                     | *                                           | *                     | 7            |
| Cenko        | 2019 | *                                        | *                                  | *                                     | *                                                 | **            | *                     | \                                           | *                     | 8            |
| Hao          | 2019 | *                                        | *                                  | *                                     | *                                                 | **            | *                     | \                                           | *                     | 8            |
| Hannan       | 2019 | *                                        | *                                  | *                                     | *                                                 | **            | *                     | \                                           | *                     | 8            |
| Maznyczka    | 2019 | \                                        | \                                  | *                                     | *                                                 | \             | *                     | *                                           | *                     | 5            |
| Stehli       | 2019 | *                                        | *                                  | *                                     | *                                                 | **            | *                     | \                                           | *                     | 8            |
| Burgess      | 2020 | \                                        | \                                  | *                                     | *                                                 | **            | *                     | *                                           | *                     | 7            |
| Dharma       | 2020 | \                                        | \                                  | *                                     | *                                                 | *             | *                     | *                                           | *                     | 6            |
| Kerkmanx     | 2020 | *                                        | *                                  | *                                     | *                                                 | \             | *                     | *                                           | *                     | 7            |
| Siabani      | 2020 | \                                        | \                                  | *                                     | *                                                 | *             | *                     | \                                           | *                     | 5            |
| Tai          | 2020 | \                                        | \                                  | *                                     | *                                                 | **            | *                     | *                                           | *                     | 7            |
| Tizón        | 2020 | *                                        | *                                  | *                                     | *                                                 | **            | *                     | *                                           | *                     | 9            |

eFigure 1 Forest plots of relative risks of short-term all-cause mortality of studies with Newcastle-Ottawa scale >7 points and with ≤7 points.

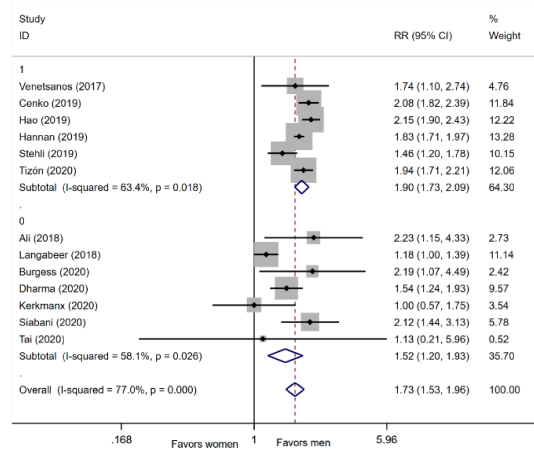

eFigure 2 Meta-influence analysis for unadjusted short-term mortality

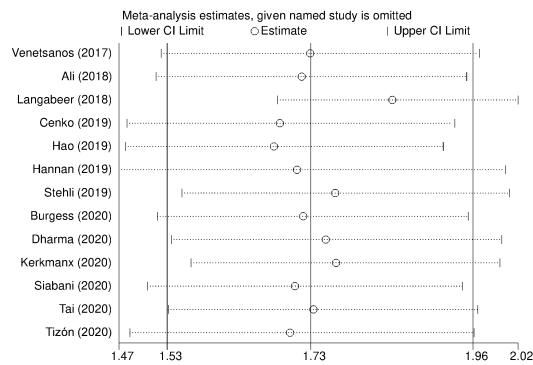

eFigure 3 Meta-influence analysis for unadjusted long-term mortality

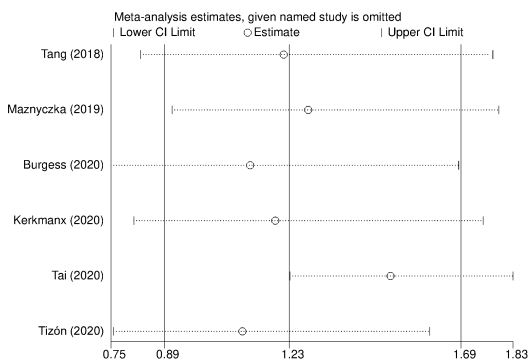

eFigure 4 Funnel plots for publication bias for unadjusted short-term (A) and long-term (B) mortality

A

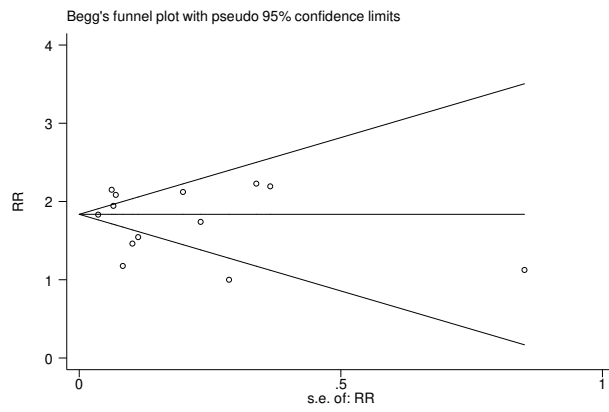

B

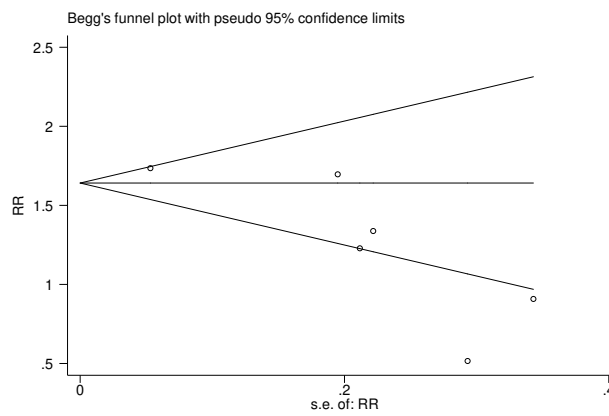

Supplement: bmjopen-2021-053379supp001.pdf [file bmjopen-2021-053379supp001.pdf]
