# Supplementary material for: Contemporary sex differences in mortality among patients with ST-segment elevation myocardial infarction: a systematic review and meta-analysis
Source: PubMed Central journal article supplement — BMJ Open. 2022 Mar 9;12(3):e053379. doi: 10.1136/bmjopen-2021-053379 (PMC8915368; doi:10.1136/bmjopen-2021-053379), 2022-03-09
Supplement: bmjopen-2021-053379.draft_revisions.pdf [file bmjopen-2021-053379.draft_revisions.pdf]

# BMJ Open

BMJ Open is committed to open peer review. As part of this commitment we make the peer review history of every article we publish publicly available.

When an article is published we post the peer reviewers' comments and the authors' responses online. We also post the versions of the paper that were used during peer review. These are the versions that the peer review comments apply to.

The versions of the paper that follow are the versions that were submitted during the peer review process. They are not the versions of record or the final published versions. They should not be cited or distributed as the published version of this manuscript.

BMJ Open is an open access journal and the full, final, typeset and author-corrected version of record of the manuscript is available on our site with no access controls, subscription charges or pay-per-view fees (<http://bmjopen.bmj.com>).

If you have any questions on BMJ Open's open peer review process please email [info.bmjopen@bmj.com](mailto:info.bmjopen@bmj.com)

# BMJ Open

## Contemporary sex differences in mortality among patients with ST-segment elevation myocardial infarction: a systematic review and meta-analysis

|                               |                                                                                                                                                                                                                                                                                                                                                                                                                                                                                                                                                                                                                                      |
|-------------------------------|--------------------------------------------------------------------------------------------------------------------------------------------------------------------------------------------------------------------------------------------------------------------------------------------------------------------------------------------------------------------------------------------------------------------------------------------------------------------------------------------------------------------------------------------------------------------------------------------------------------------------------------|
| Journal:                      | <i>BMJ Open</i>                                                                                                                                                                                                                                                                                                                                                                                                                                                                                                                                                                                                                      |
| Manuscript ID                 | bmjopen-2021-053379                                                                                                                                                                                                                                                                                                                                                                                                                                                                                                                                                                                                                  |
| Article Type:                 | Original research                                                                                                                                                                                                                                                                                                                                                                                                                                                                                                                                                                                                                    |
| Date Submitted by the Author: | 12-May-2021                                                                                                                                                                                                                                                                                                                                                                                                                                                                                                                                                                                                                          |
| Complete List of Authors:     | Xi, Ziwei; Fuwai Hospital State Key Laboratory of Cardiovascular Disease<br>Qiu, Hong; Fuwai Hospital State Key Laboratory of Cardiovascular Disease<br>Guo, Tingting; Fuwai Hospital State Key Laboratory of Cardiovascular Disease<br>Wang, Yong; Fuwai Hospital State Key Laboratory of Cardiovascular Disease<br>Li, Jianan; Fuwai Hospital State Key Laboratory of Cardiovascular Disease<br>Li, Yang; Fuwai Hospital State Key Laboratory of Cardiovascular Disease<br>Zheng, Jianfeng; Fuwai Hospital State Key Laboratory of Cardiovascular Disease<br>Gao, R; Fuwai Hospital State Key Laboratory of Cardiovascular Disease |
| Keywords:                     | EPIDEMIOLOGY, Coronary heart disease < CARDIOLOGY, Myocardial infarction < CARDIOLOGY                                                                                                                                                                                                                                                                                                                                                                                                                                                                                                                                                |
|                               |                                                                                                                                                                                                                                                                                                                                                                                                                                                                                                                                                                                                                                      |

SCHOLARONE™  
Manuscripts

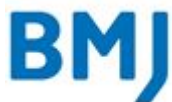

I, the Submitting Author has the right to grant and does grant on behalf of all authors of the Work (as defined in the below author licence), an exclusive licence and/or a non-exclusive licence for contributions from authors who are: i) UK Crown employees; ii) where BMJ has agreed a CC-BY licence shall apply, and/or iii) in accordance with the terms applicable for US Federal Government officers or employees acting as part of their official duties; on a worldwide, perpetual, irrevocable, royalty-free basis to BMJ Publishing Group Ltd ("BMJ") its licensees and where the relevant Journal is co-owned by BMJ to the co-owners of the Journal, to publish the Work in this journal and any other BMJ products and to exploit all rights, as set out in our [licence](#).

The Submitting Author accepts and understands that any supply made under these terms is made by BMJ to the Submitting Author unless you are acting as an employee on behalf of your employer or a postgraduate student of an affiliated institution which is paying any applicable article publishing charge ("APC") for Open Access articles. Where the Submitting Author wishes to make the Work available on an Open Access basis (and intends to pay the relevant APC), the terms of reuse of such Open Access shall be governed by a Creative Commons licence – details of these licences and which [Creative Commons](#) licence will apply to this Work are set out in our licence referred to above.

Other than as permitted in any relevant BMJ Author's Self Archiving Policies, I confirm this Work has not been accepted for publication elsewhere, is not being considered for publication elsewhere and does not duplicate material already published. I confirm all authors consent to publication of this Work and authorise the granting of this licence.

1  
2  
3  
4 **Contemporary sex differences in mortality among patients with ST-segment elevation**  
5  
6 **myocardial infarction: a systematic review and meta-analysis**  
7

8  
9 **Short title : Sex differences in STEMI**  
10

11 **First author:**

12  
13 **Ziwei Xi, M.D.**

14  
15 xixixiziwei@qq.com  
16

17  
18  
19 Fuwai Hospital, National Center for Cardiovascular Diseases, Chinese Academy of  
20  
21  
22 Medical Sciences and Peking Union Medical College  
23  
24  
25  
26

27 **Co-authors:**

28  
29 **Hong Qiu, M.D.**

30  
31 qiuhong6780@sina.com  
32

33  
34  
35 Fuwai Hospital, National Center for Cardiovascular Diseases, Chinese Academy of  
36  
37  
38 Medical Sciences and Peking Union Medical College  
39

40 **Tingting Guo, M.D.**

41  
42 18610094559@163.com  
43

44  
45  
46 Fuwai Hospital, National Center for Cardiovascular Diseases, Chinese Academy of  
47  
48  
49 Medical Sciences and Peking Union Medical College  
50

51 **Yong Wang, M.D.**

52  
53 tom4215403@163.com  
54

55  
56  
57 Fuwai Hospital, National Center for Cardiovascular Diseases, Chinese Academy of  
58  
59  
60 Medical Sciences and Peking Union Medical College

1  
2  
3  
4 **Jianan Li, M.D.**

5  
6 m18612017283@163.com

7  
8  
9 Fuwai Hospital, National Center for Cardiovascular Diseases, Chinese Academy of  
10  
11 Medical Sciences and Peking Union Medical College

12  
13  
14 **Yang Li, M.D.**

15  
16 klose-bayern@hotmail.com

17  
18  
19 Fuwai Hospital, National Center for Cardiovascular Diseases, Chinese Academy of  
20  
21 Medical Sciences and Peking Union Medical College

22  
23  
24 **Jianfeng Zheng, M.D.**

25  
26 zjfcvicvi123@163.com

27  
28  
29 Fuwai Hospital, National Center for Cardiovascular Diseases, Chinese Academy of  
30  
31 Medical Sciences and Peking Union Medical College

32  
33  
34 **Runlin Gao, M.D.**

35  
36 gaorunlin@citmd.com

37  
38  
39 Fuwai Hospital, National Center for Cardiovascular Diseases, Chinese Academy of  
40  
41 Medical Sciences and Peking Union Medical College

42  
43  
44 **Corresponding author:**

45  
46  
47 **Hong Qiu, M.D.**

48  
49 qiuhong6780@sina.com

50  
51  
52 Fuwai Hospital, National Center for Cardiovascular Diseases, Chinese Academy of  
53  
54 Medical Sciences and Peking Union Medical College, No.167 North Lishi Road, Xicheng  
55  
56  
57  
58  
59  
60

District, Beijing, China

For peer review only

1  
2  
3  
4  
5  
6  
7  
8  
9  
10  
11  
12  
13  
14  
15  
16  
17  
18  
19  
20  
21  
22  
23  
24  
25  
26  
27  
28  
29  
30  
31  
32  
33  
34  
35  
36  
37  
38  
39  
40  
41  
42  
43  
44  
45  
46  
47  
48  
49  
50  
51  
52  
53  
54  
55  
56  
57  
58  
59  
60

1  
2  
3  
4 **Contemporary sex differences in mortality among patients with ST-segment elevation**  
5  
6 **myocardial infarction: a systematic review and meta-analysis**  
7  
8  
9

10  
11  
12 **Objectives**  
13

14 To assess the effect of sex differences on short- and long-term mortality among patients  
15 with ST-segment elevation myocardial infarction (STEMI) by performing a meta-analysis  
16 of contemporary available evidence in this topic.  
17  
18  
19  
20  
21  
22  
23

24  
25 **Methods**  
26

27 PubMed, Embase and Cochrane Library were searched for relevant studies reporting sex  
28 specific outcomes among patients with STEMI. Only study conducted in last ten years were  
29 included. The primary outcome was all-cause death at short- and long-term follow-up. Risk  
30 ratio (RR) 95% CIs were measured using the Mantel-Haenszel method. The random-effect  
31 model was used for analysis. All statistical analyses were performed using STATA version  
32 15.0.  
33  
34  
35  
36  
37  
38  
39  
40  
41  
42  
43  
44  
45

46 **Results**  
47

48 A total of fifteen studies involving 128,585 patients (31,706 women and 96879 patients)  
49 were included. In the unadjusted analyses, women were at a higher risk of short-term  
50 mortality (RR, 1.73; 95%CI, 1.53-1.96, P<.001, I<sup>2</sup>=77%) but not long-term mortality (RR,  
51 1.23; 95%CI, 0.89-1.69, P<.001, I<sup>2</sup>=77.5%). When adjusted effect estimates from individual  
52 studies were used in meta-analysis, the association between women and higher risk of  
53  
54  
55  
56  
57  
58  
59  
60

1  
2  
3  
4 short-term mortality remained significant (RR, 1.24; 95%CI, 1.11-1.38, P=0.103, I<sup>2</sup>=39.6%).  
5

6 And adjusted long-term mortality was also similar between women and men (RR, 0.11;  
7

8  
9 95%CI, 0.42-1.80, P=0.008, I<sup>2</sup>=74.5%).  
10  
11  
12  
13

#### 14 **Conclusions**

15  
16  
17 An increased short- but not long-term mortality was found in women with STEMI. After  
18  
19 adjustment for baseline cardiovascular risk factors and clinical profiles, short-term mortality  
20  
21 remains higher in women with STEMI compared to men.  
22  
23  
24  
25  
26  
27  
28  
29  
30  
31  
32  
33  
34  
35  
36  
37  
38  
39  
40  
41  
42  
43  
44  
45  
46  
47  
48  
49  
50  
51  
52  
53  
54  
55  
56  
57  
58  
59  
60



#### Strengths and limitations of this study

- ◆ We assessed the contemporary effect of sex differences on mortality among patients with STEMI by meta-analysis of studies from the last decade.
- ◆ We screened a greater number of potentially eligible articles and performed a comprehensive review.
- ◆ Each included study was assessed using the Newcastle-Ottawa Scale, and heterogeneity test, bias assessment, and sensitivity analysis were conducted.
- ◆ There is substantial and nonnegligible heterogeneity in our meta-analysis

## Contemporary sex differences in short- and long-term mortality among patients with ST-segment elevation myocardial infarction: a systematic review and meta-analysis

### Introduction

Acute myocardial infarction remains one of leading causes of mortality in both men and women worldwide despite improvement of acute cardiac care.[1] Numerous studies have reported that women have a higher risk of in-hospital and long-term adverse outcomes following ST-segment elevation myocardial infarction (STEMI) compared with men.[2] Confounders including advanced age and more frequent comorbidities, such as hypertension and diabetes mellitus[3, 4], might contribute to excess mortality in women. Moreover, previous studies show lower rates of guideline directed medical therapy and revascularization are also associated with poorer prognosis for women with STEMI.[5]

Sex discrepancies in management and outcomes after STEMI have been increasingly reported in the literature and raised public awareness.[6] Major progress in therapy for myocardial infarction and primary and secondary preventive interventions has been made to reduce cardiovascular mortality for women.[1, 7] And there have been marked reductions in cardiovascular disease mortality in women with acute myocardial infarction in the past two decades.[1] Conflicting results are noted in recent studies on sex differences following STEMI. It is unclear whether the sex differences still exist, in view of substantial improvements in prognosis of cardiovascular disease over the past decade.

In order to assess the contemporary effect of sex differences on short- and long-term

1  
2  
3  
4 mortality among patients with STEMI, we performed a systematic review and meta-  
5  
6 analysis of all available evidence from last decade reporting sex-specific outcomes after  
7  
8 STEMI.  
9  
10

## 11 12 13 14 **Methods**

15  
16  
17  
18  
19 The present systematic review and meta-analysis was performed following the principle  
20  
21 of the Preferred Reporting Items for Systematic Reviews and Meta-Analyses (PRISMA)  
22  
23 statement.[8]  
24  
25  
26  
27  
28  
29

### 30 *Literature search*

31  
32 We conducted a comprehensive search of the PubMed, EMBASE, and Cochrane Library  
33  
34 from January 1, 2010 to August 1, 2020 to identify studies from the last decade that  
35  
36 described sex differences in in short- or long-term mortality among patients with STEMI.  
37  
38 We queried MeSH and the abstract text for the following three search terms: gender part  
39  
40 (including "gender", "female", "male", "gender differences", "sex differences" or "sex  
41  
42 characteristics"); outcome part (including "death", "mortality", "hospital mortality", "cardiac  
43  
44 death", "sudden cardiac death", "all-cause mortality", "long term mortality", "one year  
45  
46 mortality", "cardiovascular mortality" or "short term mortality"); myocardial infarction part  
47  
48 (including "myocardial infarction", "acute myocardial infarction", "myocardial necrosis", "ST  
49  
50 segment elevation myocardial infarction", "primary PCI", "primary percutaneous coronary  
51  
52 intervention" or "primary angioplasty") to identify relevant studies. There was no language  
53  
54  
55  
56  
57  
58  
59  
60

1  
2  
3  
4 restriction.  
5  
6  
7  
8

9 *Study selection*

10  
11 According to the aim of our analyses, studies were included in this systematic review if  
12 data about short- (in-hospital or 30 days) or long-term (at least 12 months) mortality  
13 stratified by sex in patients with STEMI were reported. Two reviewers identified studies  
14 eligible for further review by performing an initial screen of titles or abstracts of the search  
15 results. Subsequently, a second screen of full texts eligibility was performed by another  
16 two reviewers. Studies had to fulfil the following criteria to be included in the present  
17 analyses: i) studies reporting data on all-cause mortality specific to STEMI population; and  
18 ii) studies providing enough details to obtain numbers of events or incidence rates  
19 according to sex; and iii) enrollment starting earlier than a decade ago. Editorials, letters  
20 included only if sufficient information was available in abstracts or associated tables or  
21 figures. Any disagreement was reviewed by a third reviewer and resolved by consensus.  
22  
23  
24  
25  
26  
27  
28  
29  
30  
31  
32  
33  
34  
35  
36  
37  
38  
39  
40  
41  
42

43 *Data extraction*

44  
45 Detailed data from selected studies were extracted independently by two reviewers using  
46 a standardized form independently. Data about study and participants characteristics,  
47 including year of study, sample size, time of enrollment, geographical location, endpoints  
48 of study, and follow-up duration, were collected. Any discrepancies were reviewed by a  
49 third reviewer and resolved by consensus. The quality of included studies was evaluated  
50 by Newcastle-Ottawa scale using prespecified items comprised of patients' selection  
51  
52  
53  
54  
55  
56  
57  
58  
59  
60

1  
2  
3  
4 (representativeness and selection of patients, ascertainment of exposure), comparability  
5  
6 of cohorts based on design or analysis, and outcome (assessment of outcomes, adequacy  
7  
8 of follow-up).[9] A quality score (0–9) was generated according to a maximum of 1 score  
9  
10 for each item.  
11  
12  
13

### 14 15 16 17 *Patient and public involvement*

18  
19 Due to the nature of the systematic review and meta-analysis, this study did not involve  
20  
21 patients and the public in the design, or conduct, or reporting or dissemination plans.  
22  
23  
24  
25

### 26 27 *Statistical analysis*

28  
29 The risk ratios (RRs) and 95% confidence interval (CI) were primarily used to represent  
30  
31 the effect of sex differences on mortality after STEMI. And data were combined using  
32  
33 random-effects model of DerSimonian and Laird with inverse variance weighting. Random-  
34  
35 effect model was used due to substantial clinical and statistical heterogeneity. Following  
36  
37 analyses were performed: i) unadjusted RRs for short- and long-term all-cause mortality  
38  
39 using raw number of death and total participants at risk for death specific to each sex, ii)  
40  
41 adjusted RRs for short- and long-term all-cause mortality using adjusted RRs described in  
42  
43 included studies.  
44  
45  
46  
47  
48  
49

50 We assess heterogeneity across studies with Cochran's Q test and I<sup>2</sup> test, with P<0.1 or  
51  
52 I<sup>2</sup> >50% considered significant. To assess the potential effect of publication bias, we  
53  
54 inspected funnel plots for asymmetry and used the Egger's regression asymmetry test in  
55  
56 which P<0.10 was considered to indicate significant publication bias. Sensitivity analyses  
57  
58  
59  
60

1  
2  
3  
4 was conducted by excluding one study at a time and comparing the results with the  
5  
6 complete one. In addition, we also performed sensitivity analyses by restricting to high-  
7  
8 quality studies with a Newcastle-Ottawa scale of 5 points or more and restricting to studies  
9  
10 with sample size bigger than 1000 participants. All statistical analyses were performed  
11  
12 using STATA version 15.0 (Stata Corp, College Station, TX).  
13  
14  
15  
16  
17  
18

## 19 **Results**

### 20 *Literature search*

21  
22  
23  
24  
25  
26  
27 Study selection details were outlined in Figure 1. The literature search identified 2,611  
28  
29 potentially relevant articles. After screening based on title and abstract review, 116 full-text  
30  
31 were assessed for eligibility, with 96 papers excluded due to not meeting inclusion criteria.  
32  
33  
34  
35 Another 5 papers reviewed in detail were excluded after due to data from the same cohorts.  
36  
37  
38 A total of 15 studies were finally included in the present systematic review and meta-  
39  
40 analysis.[10-24]  
41  
42  
43  
44  
45  
46

### 47 *Study characteristics*

48  
49 Of the 15 included studies, 8 were multicenter studies and 4 studies enrolled more than  
50  
51 10,000 patients with STEMI. See Table 1 for further information of included studies. Except  
52  
53 for 1 study, which was a prespecified gender analysis of randomized controlled trial, the  
54  
55 remaining 14 were observational studies. Among the 10 included studies which reported  
56  
57 adjusted analyses, most studied adjusted for age, diabetes mellitus, hypertension, and  
58  
59  
60

1  
2  
3  
4 prior myocardial infarction/PCI, while some adjusted for renal insufficiency, cardiogenic  
5  
6 shock, cardiac arrest at admission and occurrence time of symptom onset.  
7  
8  
9

### 10 11 *Patient characteristics*

12  
13  
14 A total of 128,585 patients with STEMI (31,706 women and 95,610 man) were involved in  
15  
16 the 15 included studies. Women tended to be older and had higher prevalence of diabetes  
17  
18 mellitus in all included studies. And in most studies, other important comorbidities,  
19  
20 including hypertension and hyperlipidemia, were more frequent in women. Greater  
21  
22 proportions of men were smokers and had prior PCI or myocardial infarction. In addition,  
23  
24 some studies reported that door-to-balloon time and symptom onset to balloon time were  
25  
26 longer in women than men. Part of patient baseline characteristics were summarized in  
27  
28 Table 2.  
29  
30  
31  
32  
33  
34  
35  
36  
37

### 38 *Short-term all-cause mortality*

39  
40 Thirteen studies reported sex-specific unadjusted short-term mortality of patients with  
41  
42 STEMI. There were 2,873 of 31,409 (9.1%) cases of all-cause mortality in women  
43  
44 compared with 4,380 of 95,610 (4.6%) in men. Women were at a significantly higher risk  
45  
46 of short-term mortality (RR, 1.73; 95%CI, 1.53-1.96,  $P<.001$ ,  $I^2=77%$ ) compared with men  
47  
48 (Figure 2 A). Nine studies involving 119,379 patients reported adjusted short-term mortality  
49  
50 specific to sex. In adjusted analysis, the association between women and higher risk of  
51  
52 short-term mortality remained significant (RR, 1.24; 95%CI, 1.11-1.38,  $P=0.103$ ,  $I^2=39.6%$ )  
53  
54 (Figure 2 B). However, the strength of association calculated with adjusted RRs from these  
55  
56  
57  
58  
59  
60

1  
2  
3  
4 9 studies was attenuated. Results of assessment of study quality using Newcastle-Ottawa  
5  
6 scale were shown in eTable 1 in the Supplementary Material.  
7  
8  
9

### 10 11 *Long-term all-cause mortality*

12  
13  
14 Six studies involved 18,018 patients with STEMI (4,191 women and 13,827 men) and  
15  
16 followed up for more than 1 year, and reported all-cause mortality for women and men.  
17  
18 The incidence of long-term all-cause mortality was 13.9% (n=584) in women and 8.7%  
19  
20 (n=1202) in men. In unadjusted analysis, no significant sex difference was found in long-  
21  
22 term mortality (RR, 1.23; 95%CI, 0.89-1.69, P<.001, I<sup>2</sup>=77.5%) (Figure 3 A). And the  
23  
24 adjusted analysis of the pooled results from four studies, also showed a similar risk of  
25  
26 mortality at long-term follow-up in women compared with men (RR, 1.11; 95%CI, 0.42-1.80,  
27  
28 P=0.008, I<sup>2</sup>=74.5%) (Figure 3 B).  
29  
30  
31  
32  
33  
34  
35  
36  
37

### 38 *Sensitivity analyses and publication bias*

39  
40 Sensitivity analysis by excluding one study at a time (See eFigure 1 in the Supplementary  
41  
42 Material) or restricted to data from studies with sample size bigger than 1000 (RR, 1.75;  
43  
44 95%CI, 1.54-1.99, P<.001, I<sup>2</sup>=82.9%) both indicated that none of the studies affected the  
45  
46 results of short-term mortality in this meta-analysis significantly. In analysis for long-term  
47  
48 mortality, sensitivity analysis showed a possibly higher influence on the result attribute to  
49  
50 the study of Tai et al (See eFigure 2 in the Supplementary Material). After removing this  
51  
52 study from meta-analysis, the association of women with increased long-term mortality  
53  
54 became significant (RR, 1.50; 95%CI, 1.23-1.83, P=0.148, I<sup>2</sup>=40.9%). We found no  
55  
56  
57  
58  
59  
60



1  
2  
3  
4 evidence of publication bias across studies based on visual inspection of funnel plots (See  
5  
6 eFigure 3 in the Supplementary Material) and the results from Egger's tests for short-term  
7  
8 mortality (P=0.462) and for long-term mortality (P=0.053).  
9  
10  
11  
12  
13

#### 14 **Discussion:**

15  
16  
17  
18  
19 Our systematic review and meta-analysis of contemporary literature on sex differences  
20  
21 among patients with STEMI demonstrate that women have a higher risk of short- but not  
22  
23 long-term mortality compared with men with STEMI. Furthermore, after adjustment for  
24  
25 baseline cardiovascular risk factors and clinical profiles, the sex differences in short-term  
26  
27 mortality are attenuated but remain significant, while women have the similar long-term  
28  
29 mortality with men.  
30  
31  
32  
33  
34  
35  
36  
37

38 It is widely accepted that there are significant differences in outcomes of women and men  
39  
40 with acute myocardial infarction. In our study, after adjusted for participants' baseline  
41  
42 cardiovascular risk factors and clinical profiles, the strength of association between gender  
43  
44 and short-term mortality was substantially attenuated, which suggested that poorer  
45  
46 baseline cardiovascular risk profile partially explained the impact of sex differences on  
47  
48 mortality. Multiple studies have shown that women with STEMI present at older age and  
49  
50 have a higher burden of comorbidities, contributing to the sex differences in mortality after  
51  
52 STEMI.[25] All studies included in our meta-analysis demonstrate that female patients are  
53  
54 older and with more diabetes mellitus as well as hypertension. In addition, some sex-  
55  
56  
57  
58  
59  
60

1  
2  
3  
4 specific studies found that certain risk factors and comorbidities were more potent in  
5  
6 women.[26] Diabetes mellitus , hypertension and smoking status are more strongly  
7  
8 associated with increased risk of cardiac events in women compared with men.[25, 27]  
9  
10

11  
12  
13  
14 Notably, that these differences mentioned above still could not completely explain the gap  
15  
16 in mortality between sexes. It has been proved that women with acute myocardial infarction  
17  
18 were less likely to be treated with guideline directed medical therapy and less likely to  
19  
20 receive primary reperfusion therapy including primary percutaneous coronary intervention  
21  
22 or fibrinolysis.[28] Regarding medical therapy, numerous studies conducted around the  
23  
24 world consistently demonstrate female survivors are receiving less optimal medical therapy  
25  
26 after acute myocardial infarction during hospitalization or at discharge.[29, 30] Though  
27  
28 there might be no differences in treatment adherence between men and women, some  
29  
30 studies report significant sex disparities in initiation of appropriate pharmacotherapy after  
31  
32 myocardial infarction.[31] Results from these observational studies show women are  
33  
34 receiving less optimal medical therapy including aspirin, statins, and angiotensin-  
35  
36 converting enzyme inhibitors in all age groups, especially young women, and suggest that  
37  
38 clinicians and patients may benefit from better education and awareness of undertreatment  
39  
40 of younger women.[31, 32]  
41  
42  
43  
44  
45  
46  
47  
48  
49  
50

51  
52  
53 Lower rates of revascularization are observed among women with STEMI compared with  
54  
55 men in several studies despite proven benefit of this therapy.[33] Moreover, the sex  
56  
57 differences might be driven by delays in presentation to hospital and women with STEMI  
58  
59  
60

1  
2  
3  
4 were more likely to experience longer delays than men. Although a great improvement in  
5  
6 emergency medical services and timely revascularization over the past decades, recent  
7  
8 studies show that women with STEMI still present later and have a longer ischemic time  
9  
10 than men. Previous studies have shown consistently that women have longer door-to  
11  
12 balloon times and longer door-to needle times.[34, 35] In addition, women are also more  
13  
14 likely to exhibit longer pre-hospital delays in seeking medical care after the development  
15  
16 of symptoms suggestive of myocardial infarction. Although there have been significant  
17  
18 reductions in patient and system delay in the last decade, women continue to have longer  
19  
20 presentation and treatment times.[36] Sex differences also exist in clinical presentation of  
21  
22 STEMI. Although chest pain was the most common ACS symptom in both sexes, women  
23  
24 were more likely to present without chest pain than men.[37, 38] Lower rates of typical  
25  
26 chest pain reported among women with STEMI may also influence provider decision-  
27  
28 making to pursue less aggressive care including invasive revascularization.  
29  
30  
31  
32  
33  
34  
35  
36  
37  
38  
39

40 Complications including bleeding, heart failure and mechanical complications are more  
41  
42 likely to develop in women with acute myocardial infarction and increase the risk of  
43  
44 mortality.[14, 39, 40] Bleeding secondary to antithrombotic therapies and invasive  
45  
46 procedures is more frequent in women.[41] Three included studies reported incidence of  
47  
48 bleeding following STEMI and they all found that women were at higher risk of bleeding.[10,  
49  
50 13, 18] One study included in our analysis examined the relationships among sex, acute  
51  
52 heart failure, and related outcomes after STEMI.[14] Its results demonstrate that women  
53  
54 are at higher risk to develop de novo heart failure after STEMI and women with de novo  
55  
56  
57  
58  
59  
60

1  
2  
3  
4 heart failure have worse survival compared with men. However, we could not compare the  
5  
6 incidence of these complications due to the lack of sufficient data. Mechanical  
7  
8 complications requiring surgical intervention are also much more common in women after  
9  
10 acute myocardial infarction and associated with high mortality rates.[42]  
11  
12  
13  
14  
15  
16

17 Several limitations of this meta-analysis should be considered. First, the included studies  
18  
19 are all observational studies except one post hoc analysis of randomized controlled trial.  
20  
21 Hence, there may be residual confounding bias inherent in the observational study design  
22  
23 in our meta-analysis. Second, in adjusted analysis, not all included studies adjusted for the  
24  
25 same confounders and not all studies reported adjusted RRs. Third, there was substantial  
26  
27 heterogeneity in our meta-analysis, which could partly be attributed to the wide variability  
28  
29 in the sample sizes, locations, and treatment regimens across included studies. Fourth,  
30  
31 the analysis of long-term mortality, especially the adjusted analysis, included far fewer  
32  
33 studies compared with analysis of short-term mortality. Hence, there might be significant  
34  
35 bias in the results about long-term mortality.  
36  
37  
38  
39  
40  
41  
42  
43  
44  
45

46 In conclusion, our meta-analysis, pooling data from contemporary literature, shows that  
47  
48 women with STEMI have a higher risk of short-term mortality but not long-term mortality.  
49  
50 The effect of sex differences on mortality in patients with STEMI remain significant after  
51  
52 adjustment for baseline cardiovascular risk factors and clinical profiles, suggesting that  
53  
54 public awareness of increased risk and further improvements in management in women  
55  
56 with STEMI are necessary.  
57  
58  
59  
60

### Contribution statement

Ziwei Xi: Study concepts, Study design, Literature research, Statistical analysis, Manuscript preparation, Manuscript editing. Tingting Guo and Yong Wang: Data acquisition, Data analysis/interpretation. Jinan Li, Yang Li, Jianfeng Zheng and Runlin Gao: Manuscript revision/review. Hong Qiu: Manuscript final version approval.

### Conflict of interest

The authors declare that there is no conflict of interest.

### Funding

This research received no specific grant from any funding agency in the public, commercial, or not-for-profit sectors.

### Ethics approval

The institutional central committee at Fuwai Hospital approved that the study protocol and inform consent was not required for a systematic review and meta-analysis.

### Data sharing statement

As this is a systematic review and meta-analysis, the data used in the study have already been published by the authors of the included studies. Further information can be obtained

1  
2  
3  
4 from the corresponding author  
5  
6  
7  
8  
9  
10  
11  
12  
13  
14  
15  
16  
17  
18  
19  
20  
21  
22  
23  
24  
25  
26  
27  
28  
29  
30  
31  
32  
33  
34  
35  
36  
37  
38  
39  
40  
41  
42  
43  
44  
45  
46  
47  
48  
49  
50  
51  
52  
53  
54  
55  
56  
57  
58  
59  
60

For peer review only

1  
2  
3  
4  
5  
6  
7  
8  
9  
10  
11  
12  
13  
14  
15  
16  
17  
18  
19  
20  
21  
22  
23  
24  
25  
26  
27  
28  
29  
30  
31  
32  
33  
34  
35  
36  
37  
38  
39  
40  
41  
42  
43  
44  
45  
46

Table 1 Characteristics of included studies.

| <i>First Author</i> | <i>Year</i> | <i>Region</i> | <i>Multicenter</i> | <i>Time enrollment</i> | <i>Number of STEMI patients enrolled</i> | <i>Number of Female</i> | <i>Endpoint</i>                                                   | <i>Follow-up duration</i> |
|---------------------|-------------|---------------|--------------------|------------------------|------------------------------------------|-------------------------|-------------------------------------------------------------------|---------------------------|
| <i>Venetsanos</i>   | 2017        | 13 countries  | Yes                | Sep, 2011-Oct, 2013    | 1,862                                    | 369 (20.0)              | Major adverse cardiovascular events and definite stent thrombosis | 30 d                      |
| <i>Ali</i>          | 2018        | Germany       | No                 | 2013-2017              | 312                                      | 101 (32.4)              | All-cause in-hospital mortality                                   | NA                        |
| <i>Langabeer</i>    | 2018        | US            | Yes                | Jan, 2010-Dec, 2015    | 9,674                                    | 2,569 (26.6)            | In-hospital mortality                                             | NA                        |
| <i>Tang</i>         | 2018        | China         | No                 | Jan, 2013-Dec,         | 1,238                                    | 210 (1.9)               | Major adverse cardiac and                                         | 730 ± 30 d                |

|               |      |           |     |       |           |        |           |                                                             |         |
|---------------|------|-----------|-----|-------|-----------|--------|-----------|-------------------------------------------------------------|---------|
|               |      |           |     |       | 2013      |        |           | cerebrovascular events                                      |         |
| <i>Cenko</i>  | 2019 | 12        | Yes | Jan,  | 2010-Jul, | 10,443 | 3,112     | 30-day all-cause mortality                                  | 30 d    |
|               |      | Europea   |     |       | 2018      |        | (29.8)    |                                                             |         |
|               |      | n         |     |       |           |        |           |                                                             |         |
|               |      | countries |     |       |           |        |           |                                                             |         |
| <i>Hao</i>    | 2019 | China     | Yes | Nov,  | 2014-Jun, | 50,203 | 11,016    | In-hospital mortality                                       | NA      |
|               |      |           |     |       | 2018      |        | (21.9)    |                                                             |         |
| <i>Hannan</i> | 2019 | US        | Yes | Jan,  | 2013-Dec, | 23,809 | 7,791     | In hospital/30-day mortality                                | 30 d    |
|               |      |           |     |       | 2015      |        | (32.7)    |                                                             |         |
| <i>Maznyc</i> | 2019 | UK        | No  | July, | 2011-Nov, | 324    | 87 (26.9) | All-cause death/ first heart failure                        | 5 years |
| <i>zka</i>    |      |           |     |       | 2012      |        |           | hospitalisation                                             |         |
| <i>Stehli</i> | 2019 | Australia | Yes |       | 2013-2016 | 6431   | 1,317     | In hospital/30-day major adverse events, and major bleeding | 30 d    |
|               |      |           |     |       |           |        | (20.5)    |                                                             |         |



1  
2  
3  
4  
5  
6  
7  
8  
9  
10  
11  
12  
13  
14  
15  
16  
17  
18  
19  
20  
21  
22  
23  
24  
25  
26  
27  
28  
29  
30  
31  
32  
33  
34  
35  
36  
37  
38  
39  
40  
41  
42  
43  
44  
45  
46

|                |      |             |     |                     |        |             |                                         |                 |
|----------------|------|-------------|-----|---------------------|--------|-------------|-----------------------------------------|-----------------|
| <i>Burgess</i> | 2020 | Australia   | No  | Dec, 2010-Apr, 2014 | 589    | 123 (21)    | Cardiac death and myocardial infarction | 2 years         |
| <i>Dharma</i>  | 2020 | Indonesia   | No  | Feb, 2011-Aug, 2019 | 6557   | 929 (14.2)  | All-cause mortality                     | 30 d and 1 year |
| <i>Kerkman</i> | 2020 | Netherlands | Yes | 2015-2016           | 787    | 229 (29)    | All-cause mortality                     | 1 year          |
| <i>Siabani</i> | 2020 | Iran        | No  | Jun, 2016-May, 2018 | 1484   | 311(21)     | In-hospital mortality                   | NA              |
| <i>Tai</i>     | 2020 | China       | No  | Jan, 2013-Dec, 2017 | 182    | 56 (30.8)   | In hospital/1-year mortality            | 1 year          |
| <i>Tizón</i>   | 2020 | Spain       | Yes | 2010-2016           | 14,690 | 3486 (23.7) | 30-day/1-year all-cause mortality       | 1 year          |

Table 2 Baseline characteristics of participants in included studies.

| First Author | Year | Age, mean (SD), years |                | Diabetes, % |      | Hypertension, % |      | Hyperlipidemia, % |      | Smoking, % | Prior MI, % |      | Prior PCI, % |      |      |
|--------------|------|-----------------------|----------------|-------------|------|-----------------|------|-------------------|------|------------|-------------|------|--------------|------|------|
|              |      | Female                | Male           | Female      | Male | Female          | Male | Female            | Male |            | Female      | Male | Female       | Male |      |
| Venetsanos   | 2017 | 69<br>(13.0)          | 59<br>(11.0)   | 13.0        | 13.7 | 51.5            | 40.5 | 31.7              | 35.9 | NA         | NA          | 6.5  | 9.0          | 4.3  | 8.3  |
| Ali          | 2018 | NA                    | NA             | NA          | NA   | NA              | NA   | NA                | NA   | NA         | NA          | NA   | NA           | NA   | NA   |
| Langa        | 2018 | 62.5<br>(13.6)        | 60.2<br>(12.5) | 29.6        | 27.8 | NA              | NA   | 49.3              | 52.0 | 37.0       | 38.9        | 16.9 | 18.4         | NA   | NA   |
| Tang         | 2018 | 64.5                  | 54.4           | 31.4        | 25.1 | 67.1            | 53.3 | 59.5              | 60.3 | 15.7       | 77.3        | 4.8  | 6.8          | 28.6 | 22.8 |

|               |      |         |            |      |      |      |      |      |      |      |      |     |      |      |      |
|---------------|------|---------|------------|------|------|------|------|------|------|------|------|-----|------|------|------|
|               |      | (9.3)   | (10.7)     |      |      |      |      |      |      |      |      |     |      |      |      |
| <i>Cenko</i>  | 2019 | 66.1    | 59.7       | 29.7 | 20.9 | 74.6 | 61.4 | 43.3 | 42.3 | 32.5 | 50.7 | 9.7 | 11.5 | 9.8  | 10.4 |
|               |      | (11.7)  | (11.7)     |      |      |      |      |      |      |      |      |     |      |      |      |
| <i>Hao</i>    | 2019 | 69.0    | 61.1       | 48.1 | 39.4 | 74.1 | 62.9 | 85.4 | 83.3 | 8.2  | 53.0 | NA  | NA   | NA   | NA   |
|               |      | (10.6)  | (12.4)     |      |      |      |      |      |      |      |      |     |      |      |      |
| <i>Hanna</i>  | 2019 | 70.72   | 62.11      | NA   | NA  | NA   | 11.1 | 13.8 |
| <i>n</i>      |      | (14.73) | (12.82)    |      |      |      |      |      |      |      |      |     |      |      |      |
| <i>Mazny</i>  | 2019 | 61.2    | 58.6(11.2) | 9.2  | 11.0 | 36.8 | 30.8 | 32.2 | 27.8 | 65.5 | 58.6 | 5.7 | 8.4  | 2.3  | 6.8  |
| <i>czka</i>   |      | (12.2)  | 2)         |      |      |      |      |      |      |      |      |     |      |      |      |
| <i>Stehli</i> | 2019 | 66.5    | 60.8       | 18.6 | 15.1 | NA   | NA   | NA   | NA   | NA   | NA   | NA  | NA   | 7.9  | 11.3 |
|               |      | (13.2)  | (12.2)     |      |      |      |      |      |      |      |      |     |      |      |      |
| <i>Burge</i>  | 2020 | 62.7    | 58.2       | 31.7 | 18.9 | 68.3 | 52.1 | 67.5 | 52.3 | 52.0 | 54.1 | 7.3 | 8.8  | NA   | NA   |
| <i>ss</i>     |      | (52.7-  | (50.6-     |      |      |      |      |      |      |      |      |     |      |      |      |

|              |      |         |         |      |      |      |      |      |      |      |      |      |      |      |      |
|--------------|------|---------|---------|------|------|------|------|------|------|------|------|------|------|------|------|
|              |      | 73.2)   | 65.7)   |      |      |      |      |      |      |      |      |      |      |      |      |
| <i>Dhar</i>  | 2020 | 60 (10) | 55 (10) | 43.4 | 27.5 | 69.6 | 51.3 | 32.2 | 31.6 | 11.7 | 71.9 | NA   | NA   | NA   | NA   |
| <i>ma</i>    |      |         |         |      |      |      |      |      |      |      |      |      |      |      |      |
| <i>Kerkm</i> | 2020 | 68 (14) | 61 (12) | 17.6 | 12.5 | 45.7 | 33.6 | 25.9 | 21.0 | 41.1 | 49.3 | 13.6 | 13.7 | 14.4 | 14.2 |
| <i>anx</i>   |      |         |         |      |      |      |      |      |      |      |      |      |      |      |      |
| <i>Siaba</i> | 2020 | 65.8    | 59.0    | 37.7 | 16.2 | 63.7 | 35.4 | 36.7 | 18.5 | 13.2 | 55.9 | NA   | NA   | NA   | NA   |
| <i>ni</i>    |      | (11.3)  | (12.4)  |      |      |      |      |      |      |      |      |      |      |      |      |
| <i>Tai</i>   | 2020 | 78 (76– | 78 (76– | 35.2 | 26.5 | 79.5 | 72.8 | NA   | NA   | 5.4  | 56.5 | NA   | NA   | 13.5 | 18.1 |
|              |      | 81)     | 80)     |      |      |      |      |      |      |      |      |      |      |      |      |
| <i>Tizón</i> | 2020 | 69.9    | 60.9    | 24.2 | 17.2 | 34.2 | 24.3 | 25.2 | 21.2 | 13.6 | 24.2 | NA   | NA   | NA   | NA   |
|              |      | (13.7)  | (12.6)  |      |      |      |      |      |      |      |      |      |      |      |      |

1  
2  
3  
4  
5  
6  
7  
8  
9  
10  
11  
12  
13  
14  
15  
16  
17  
18  
19  
20  
21  
22  
23  
24  
25  
26  
27  
28  
29  
30  
31  
32  
33  
34  
35  
36  
37  
38  
39  
40  
41  
42  
43  
44  
45  
46  
47  
48  
49  
50  
51  
52  
53  
54  
55  
56  
57  
58  
59  
60

For peer review only

## Reference:

- [1] Virani SS, Alonso A, Benjamin EJ, Bittencourt MS, Callaway CW, Carson AP, et al. Heart Disease and Stroke Statistics-2020 Update: A Report From the American Heart Association. *Circulation*. 2020;141:e139-e596.
- [2] Pancholy SB, Shantha GP, Patel T, Cheskin LJ. Sex differences in short-term and long-term all-cause mortality among patients with ST-segment elevation myocardial infarction treated by primary percutaneous intervention: a meta-analysis. *JAMA internal medicine*. 2014;174:1822-30.
- [3] Wenger NK, Arnold A, Bairey Merz CN, Cooper-DeHoff RM, Ferdinand KC, Fleg JL, et al. Hypertension Across a Woman's Life Cycle. *Journal of the American College of Cardiology*. 2018;71:1797-813.
- [4] Peters SAE, Woodward M. Sex Differences in the Burden and Complications of Diabetes. *Current diabetes reports*. 2018;18:33.
- [5] Huded CP, Johnson M, Kravitz K, Menon V, Abdallah M, Gullett TC, et al. 4-Step Protocol for Disparities in STEMI Care and Outcomes in Women. *Journal of the American College of Cardiology*. 2018;71:2122-32.
- [6] Mehta LS, Beckie TM, DeVon HA, Grines CL, Krumholz HM, Johnson MN, et al. Acute Myocardial Infarction in Women: A Scientific Statement From the American Heart Association. *Circulation*. 2016;133:916-47.
- [7] Reed GW, Rossi JE, Cannon CP. Acute myocardial infarction. *Lancet (London, England)*. 2017;389:197-210.
- [8] Moher D, Liberati A, Tetzlaff J, Altman DG. Preferred reporting items for systematic reviews

1  
2  
3  
4 and meta-analyses: the PRISMA statement. *BMJ (Clinical research ed)*. 2009;339:b2535.

5  
6 [9] Stang A. Critical evaluation of the Newcastle-Ottawa scale for the assessment of the quality  
7  
8 of nonrandomized studies in meta-analyses. *European journal of epidemiology*. 2010;25:603-  
9  
10  
11  
12 5.

13  
14 [10] Venetsanos D, Sederholm Lawesson S, Alfredsson J, Janzon M, Cequier A, Chettibi M, et  
15  
16 al. Association between gender and short-term outcome in patients with ST elevation  
17  
18 myocardial infarction participating in the international, prospective, randomised Administration  
19  
20 of Ticagrelor in the catheterisation Laboratory or in the Ambulance for New ST elevation  
21  
22 myocardial Infarction to open the Coronary artery (ATLANTIC) trial: a prespecified analysis.  
23  
24  
25  
26  
27 *BMJ open*. 2017;7:e015241.

28  
29  
30 [11] Ali M, Lange SA, Wittlinger T, Lehnert G, Rigopoulos AG, Noutsias M. In-hospital mortality  
31  
32 after acute STEMI in patients undergoing primary PCI. *Herz*. 2018;43:741-5.

33  
34 [12] Langabeer JR, 2nd, Henry TD, Fowler R, Champagne-Langabeer T, Kim J, Jacobs AK.  
35  
36 Sex-Based Differences in Discharge Disposition and Outcomes for ST-Segment Elevation  
37  
38 Myocardial Infarction Patients Within a Regional Network. *Journal of women's health (2002)*.  
39  
40  
41  
42  
43 2018;27:1001-6.

44  
45 [13] Tang XF, Song Y, Xu JJ, Ma YL, Zhang JH, Yao Y, et al. Effect of sex difference in clinical  
46  
47 presentation (stable coronary artery disease vs unstable angina pectoris or non-ST-elevation  
48  
49 myocardial infarction vs ST-elevation myocardial infarction) on 2-year outcomes in patients  
50  
51  
52  
53  
54  
55  
56  
57 undergoing percutaneous coronary intervention. *Journal of interventional cardiology*.  
58  
59  
60 2018;31:5-14.

[14] Cenko E, van der Schaar M, Yoon J, Manfrini O, Vasiljevic Z, Vavlukis M, et al. Sex-Related

1  
2  
3  
4 Differences in Heart Failure After ST-Segment Elevation Myocardial Infarction. *Journal of the*  
5  
6  
7 *American College of Cardiology*. 2019;74:2379-89.

8  
9 [15] Hao Y, Liu J, Liu J, Yang N, Smith SC, Jr., Huo Y, et al. Sex Differences in In-Hospital  
10  
11  
12 Management and Outcomes of Patients With Acute Coronary Syndrome. *Circulation*.  
13  
14  
15 2019;139:1776-85.

16  
17 [16] Hannan EL, Wu Y, Tamis-Holland J, Jacobs AK, Berger PB, Ling FSK, et al. Sex  
18  
19  
20 differences in the treatment and outcomes of patients hospitalized with ST-elevation myocardial  
21  
22  
23 infarction. *Catheterization and cardiovascular interventions : official journal of the Society for*  
24  
25 *Cardiac Angiography & Interventions*. 2020;95:196-204.

26  
27 [17] Maznyczka AM, Carrick D, Carberry J, Mangion K, McEntegart M, Petrie MC, et al. Sex-  
28  
29  
30 based associations with microvascular injury and outcomes after ST-segment elevation  
31  
32  
33 myocardial infarction. *Open heart*. 2019;6:e000979.

34  
35 [18] Stehli J, Martin C, Brennan A, Dinh DT, Lefkovits J, Zaman S. Sex Differences Persist in  
36  
37  
38 Time to Presentation, Revascularization, and Mortality in Myocardial Infarction Treated With  
39  
40  
41 Percutaneous Coronary Intervention. *Journal of the American Heart Association*.  
42  
43  
44 2019;8:e012161.

45  
46 [19] Burgess SN, Juergens CP, Nguyen TL, Leung M, Robledo KP, Thomas L, et al.  
47  
48  
49 Comparison of Late Cardiac Death and Myocardial Infarction Rates in Women Vs Men With  
50  
51  
52 ST-Elevation Myocardial Infarction. *The American journal of cardiology*. 2020;128:120-6.

53  
54 [20] Dharma S, Dakota I, Andriantoro H, Firdaus I, Rahma S, Budi Siswanto B. Association of  
55  
56  
57 gender with clinical outcomes of patients with acute ST-segment elevation myocardial infarction  
58  
59  
60 presenting with acute heart failure. *Coronary artery disease*. 2020.



- 1  
2  
3  
4 [21] Kerkman T, Ten Brinke LBG, Huybrechts B, Adams R, Amoroso G, de Winter RJ, et al.  
5  
6 Evaluation of sex differences in patients with ST-elevated myocardial infarction: an  
7  
8 observational cohort study in Amsterdam and surrounding region. *Netherlands heart journal* :  
9  
10 monthly journal of the Netherlands Society of Cardiology and the Netherlands Heart Foundation.  
11  
12  
13  
14 2020;28:595-603.  
15  
16  
17 [22] Siabani S, Davidson PM, Babakhani M, Salehi N, Rahmani Y, Najafi F, et al. Gender-based  
18  
19 difference in early mortality among patients with ST-segment elevation myocardial infarction:  
20  
21 insights from Kermanshah STEMI Registry. *Journal of cardiovascular and thoracic research*.  
22  
23  
24 2020;12:63-8.  
25  
26  
27 [23] Tai S, Li X, Yang H, Zhu Z, Tang L, Fu L, et al. Sex Differences in the Outcomes of Elderly  
28  
29 Patients with Acute Coronary Syndrome. *Cardiology research and practice*.  
30  
31  
32 2020;2020:5091490.  
33  
34  
35 [24] Tizón-Marcos H, Vaquerizo B, Marrugat J, Ariza A, Carrillo X, Muñoz JF, et al. Differences  
36  
37 in 30-day complications and 1-year mortality by sex in patients with a first STEMI managed by  
38  
39 the Codi IAM network between 2010 and 2016. *Revista española de cardiología (English ed)*.  
40  
41  
42 2020.  
43  
44  
45 [25] Millett ERC, Peters SAE, Woodward M. Sex differences in risk factors for myocardial  
46  
47 infarction: cohort study of UK Biobank participants. *BMJ (Clinical research ed)*. 2018;363:k4247.  
48  
49  
50 [26] Yusuf S, Hawken S, Ounpuu S, Dans T, Avezum A, Lanas F, et al. Effect of potentially  
51  
52 modifiable risk factors associated with myocardial infarction in 52 countries (the INTERHEART  
53  
54 study): case-control study. *Lancet (London, England)*. 2004;364:937-52.  
55  
56  
57 [27] Harreiter J, Fadl H, Kautzky-Willer A, Simmons D. Do Women with Diabetes Need More  
58  
59  
60

1  
2  
3  
4 Intensive Action for Cardiovascular Reduction than Men with Diabetes? Current diabetes  
5 reports. 2020;20:61.  
6  
7

8  
9 [28] Arora S, Stouffer GA, Kucharska-Newton AM, Qamar A, Vaduganathan M, Pandey A, et  
10 al. Twenty Year Trends and Sex Differences in Young Adults Hospitalized With Acute  
11 Myocardial Infarction. *Circulation*. 2019;139:1047-56.  
12  
13  
14

15  
16 [29] Zhao M, Woodward M, Vaartjes I, Millett ERC, Klipstein-Grobusch K, Hyun K, et al. Sex  
17 Differences in Cardiovascular Medication Prescription in Primary Care: A Systematic Review  
18 and Meta-Analysis. *Journal of the American Heart Association*. 2020;9:e014742.  
19  
20  
21  
22

23  
24 [30] Eindhoven DC, Hilt AD, Zwaan TC, Schalijs MJ, Borleffs CJW. Age and gender differences  
25 in medical adherence after myocardial infarction: Women do not receive optimal treatment -  
26 The Netherlands claims database. *European journal of preventive cardiology*. 2018;25:181-9.  
27  
28  
29

30  
31 [31] Smolina K, Ball L, Humphries KH, Khan N, Morgan SG. Sex Disparities in Post-Acute  
32 Myocardial Infarction Pharmacologic Treatment Initiation and Adherence: Problem for Young  
33 Women. *Circulation Cardiovascular quality and outcomes*. 2015;8:586-92.  
34  
35  
36  
37

38  
39 [32] Nguyen HL, Goldberg RJ, Gore JM, Fox KA, Eagle KA, Gurfinkel EP, et al. Age and sex  
40 differences, and changing trends, in the use of evidence-based therapies in acute coronary  
41 syndromes: perspectives from a multinational registry. *Coronary artery disease*. 2010;21:336-  
42 44.  
43  
44  
45  
46  
47  
48

49  
50 [33] Pelletier R, Humphries KH, Shimony A, Bacon SL, Lavoie KL, Rabi D, et al. Sex-related  
51 differences in access to care among patients with premature acute coronary syndrome. *CMAJ :*  
52 *Canadian Medical Association journal = journal de l'Association medicale canadienne*.  
53 2014;186:497-504.  
54  
55  
56  
57  
58  
59  
60

1  
2  
3  
4 [34] Murphy AC, Yudi MB, Farouque O, Dinh D, Duffy SJ, Brennan A, et al. Impact of Gender  
5  
6 and Door-to-Balloon Times on Long-Term Mortality in Patients Presenting With ST-Elevation  
7  
8 Myocardial Infarction. *The American journal of cardiology*. 2019;124:833-41.

9  
10  
11 [35] D'Onofrio G, Safdar B, Lichtman JH, Strait KM, Dreyer RP, Geda M, et al. Sex differences  
12  
13 in reperfusion in young patients with ST-segment-elevation myocardial infarction: results from  
14  
15 the VIRGO study. *Circulation*. 2015;131:1324-32.

16  
17  
18 [36] Bugiardini R, Ricci B, Cenko E, Vasiljevic Z, Kedev S, Davidovic G, et al. Delayed Care  
19  
20 and Mortality Among Women and Men With Myocardial Infarction. *Journal of the American*  
21  
22 *Heart Association*. 2017;6.

23  
24  
25 [37] Khan NA, Daskalopoulou SS, Karp I, Eisenberg MJ, Pelletier R, Tsadok MA, et al. Sex  
26  
27 differences in acute coronary syndrome symptom presentation in young patients. *JAMA internal*  
28  
29 *medicine*. 2013;173:1863-71.

30  
31  
32 [38] Canto JG, Rogers WJ, Goldberg RJ, Peterson ED, Wenger NK, Vaccarino V, et al.  
33  
34 Association of age and sex with myocardial infarction symptom presentation and in-hospital  
35  
36 mortality. *Jama*. 2012;307:813-22.

37  
38  
39 [39] Moscucci M, Fox KA, Cannon CP, Klein W, López-Sendón J, Montalescot G, et al.  
40  
41 Predictors of major bleeding in acute coronary syndromes: the Global Registry of Acute  
42  
43 Coronary Events (GRACE). *European heart journal*. 2003;24:1815-23.

44  
45  
46 [40] Kolte D, Khera S, Aronow WS, Mujib M, Palaniswamy C, Sule S, et al. Trends in incidence,  
47  
48 management, and outcomes of cardiogenic shock complicating ST-elevation myocardial  
49  
50 infarction in the United States. *Journal of the American Heart Association*. 2014;3:e000590.

51  
52  
53 [41] Nanna MG, Hajduk AM, Krumholz HM, Murphy TE, Dreyer RP, Alexander KP, et al. Sex-

1  
2  
3  
4 Based Differences in Presentation, Treatment, and Complications Among Older Adults  
5  
6 Hospitalized for Acute Myocardial Infarction: The SILVER-AMI Study. *Circulation*  
7  
8  
9 Cardiovascular quality and outcomes. 2019;12:e005691.

10  
11 [42] Elbadawi A, Elgendy IY, Mahmoud K, Barakat AF, Mentias A, Mohamed AH, et al.  
12  
13  
14 Temporal Trends and Outcomes of Mechanical Complications in Patients With  
15  
16  
17 Acute Myocardial Infarction. *JACC Cardiovascular interventions*. 2019;12:1825-36.  
18  
19  
20  
21  
22  
23  
24  
25  
26  
27  
28  
29  
30  
31  
32  
33  
34  
35  
36  
37  
38  
39  
40  
41  
42  
43  
44  
45  
46  
47  
48  
49  
50  
51  
52  
53  
54  
55  
56  
57  
58  
59  
60

For peer review only

1  
2  
3  
4 Figure 1 Flowchart of selection of studies included in meta-analysis.  
5  
6  
7  
8

9 Figure 2 Forest plots of relative risks of short-term all-cause mortality among women and  
10 men with ST-segment elevation myocardial infarction.  
11  
12

13  
14 Forest plots showing unadjusted (A) and adjusted (B) short-term all-cause mortality of  
15 women compared with men with ST-segment elevation myocardial infarction using  
16 random-effects model.  
17  
18  
19  
20  
21  
22  
23  
24

25 Figure 3 Forest plots of relative risks of long-term all-cause mortality among women and  
26 men with ST-segment elevation myocardial infarction.  
27  
28

29  
30 Forest plots showing unadjusted (A) and adjusted (B) long-term all-cause mortality of  
31 women compared with men with ST-segment elevation myocardial infarction using  
32 random-effects model.  
33  
34  
35  
36  
37  
38  
39  
40  
41  
42  
43  
44  
45  
46  
47  
48  
49  
50  
51  
52  
53  
54  
55  
56  
57  
58  
59  
60

Figure 1 Flowchart of selection of studies included in meta-analysis.

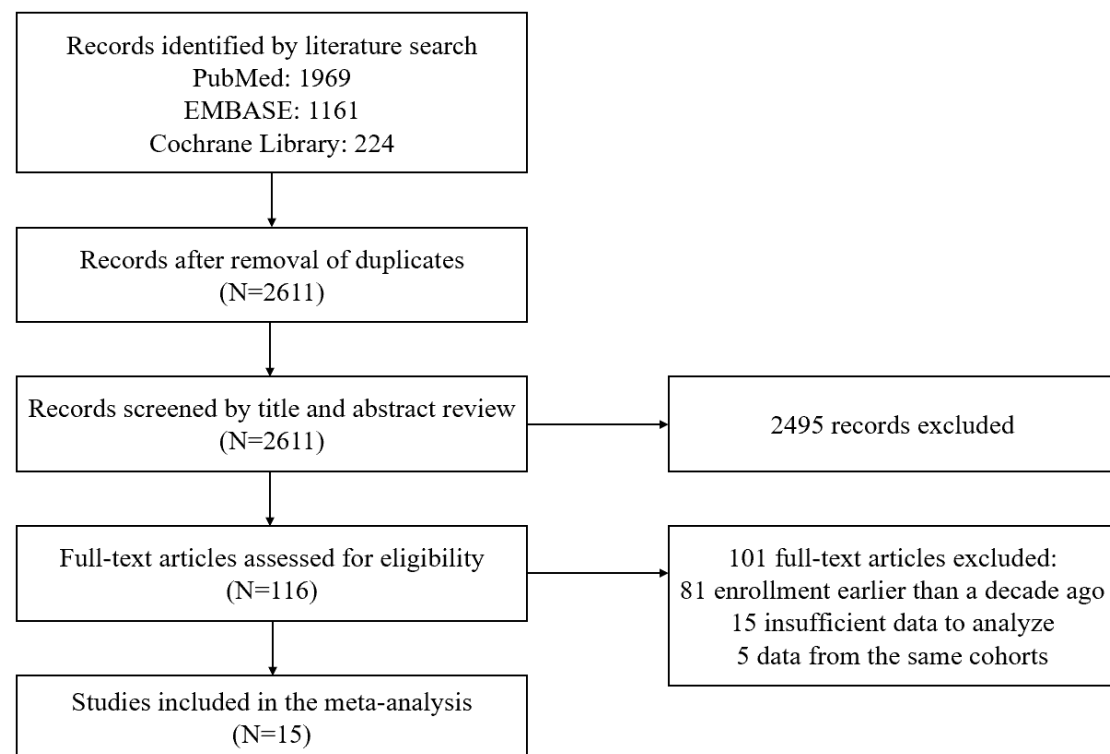

Figure 2 Forest plots of relative risks of short-term all-cause mortality among women and men with ST-segment elevation myocardial infarction.

A

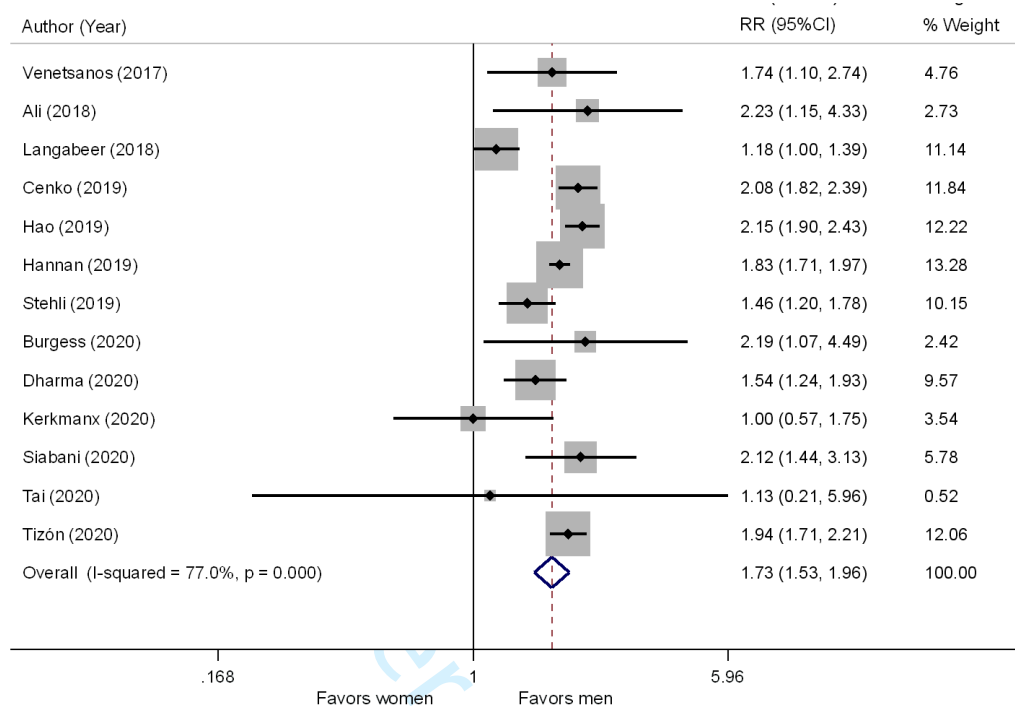

B

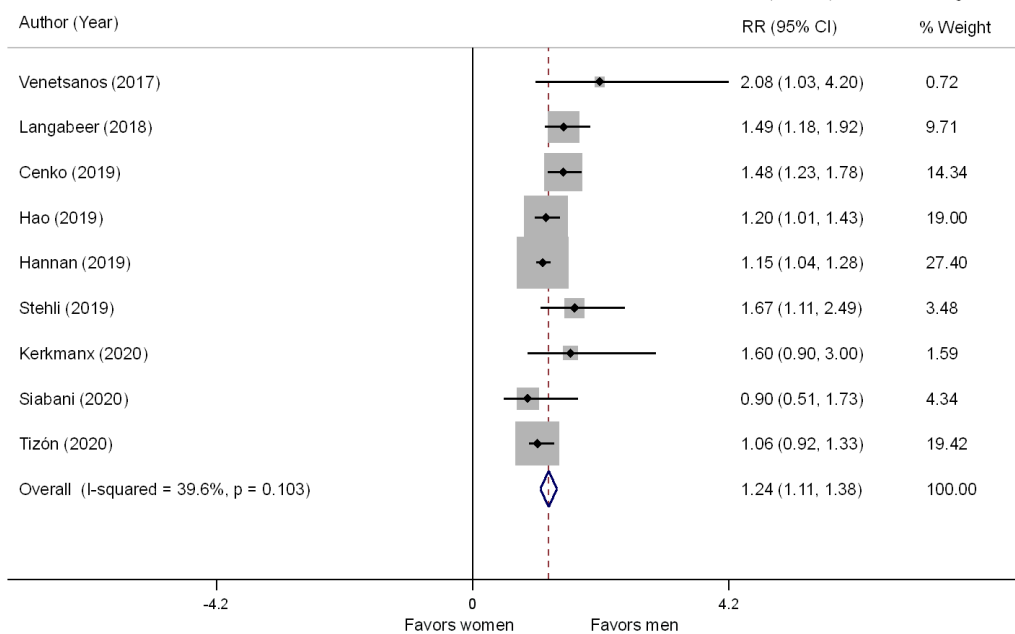

Forest plots showing unadjusted (A) and adjusted (B) short-term all-cause mortality of women compared with men with ST-segment elevation myocardial infarction using random-effects model.

Figure 3 Forest plots of relative risks of long-term all-cause mortality among women and men with ST-segment elevation myocardial infarction.

A

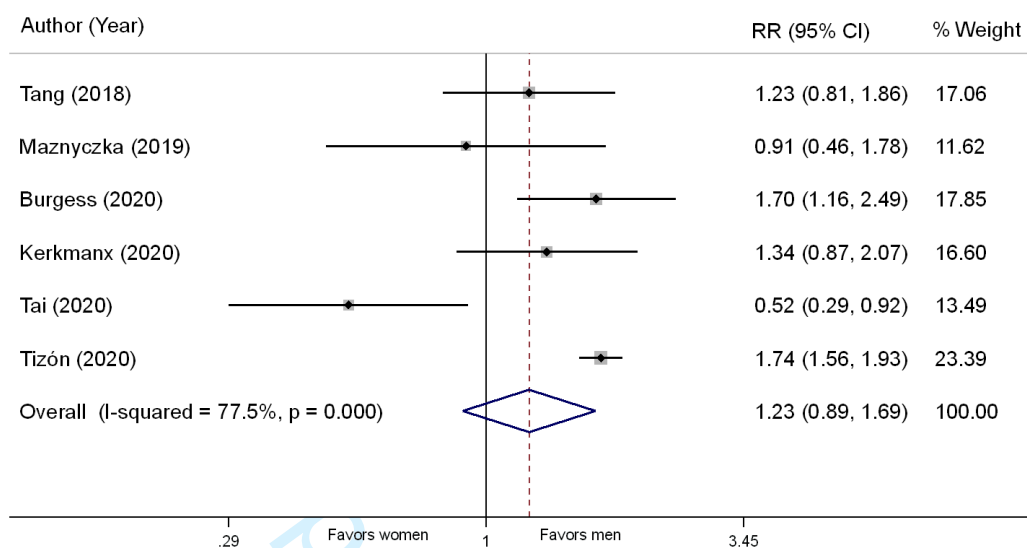

B

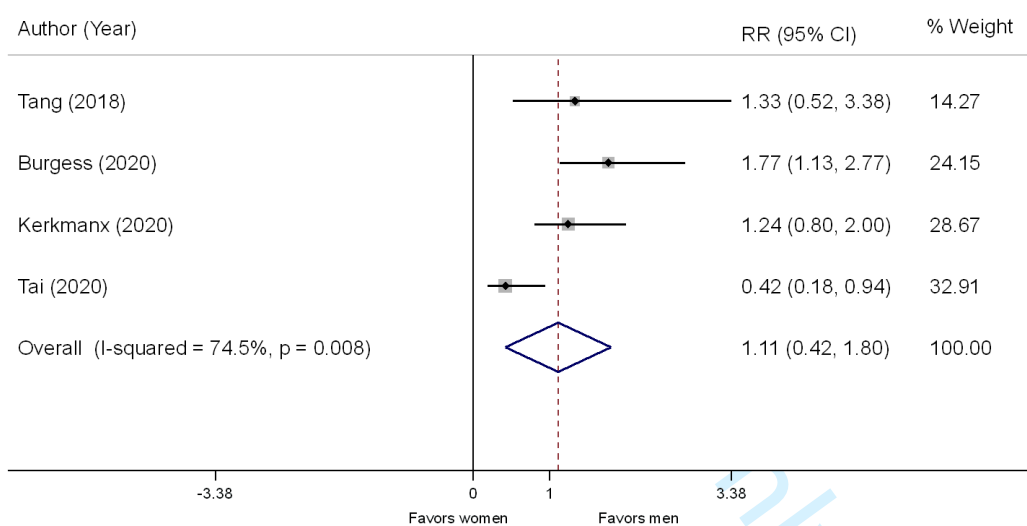

Forest plots showing unadjusted (A) and adjusted (B) long-term all-cause mortality of women compared with men with ST-segment elevation myocardial infarction using random-effects model.



1  
2  
3  
4  
5  
6  
7  
8  
9  
10  
11  
12  
13  
14  
15  
16  
17  
18  
19  
20  
21  
22  
23  
24  
25  
26  
27  
28  
29  
30  
31  
32  
33  
34  
35  
36  
37  
38  
39  
40  
41  
42  
43  
44  
45  
46

eTable 1 Table 3 Assessment of study quality using Newcastle-Ottawa scale.

| <i>First Author</i> | <i>Year</i> | <i>Selection</i>                         |                                    |                                       |                                                   | <i>Comparability</i> | <i>Outcome</i>        |                                             |                       | <i>Total point</i> |
|---------------------|-------------|------------------------------------------|------------------------------------|---------------------------------------|---------------------------------------------------|----------------------|-----------------------|---------------------------------------------|-----------------------|--------------------|
|                     |             | Representativeness of the exposed cohort | Selection of the no exposed cohort | Ascertainment of exposure to implants | Outcome of interest not present at start of study |                      | Assessment of outcome | Follow-up long enough for outcomes to occur | Adequacy of follow-up |                    |
| <i>Venetsanos</i>   | 2017        | *                                        | *                                  | *                                     | *                                                 | **                   | *                     | \                                           | *                     | 8                  |
| <i>Ali</i>          | 2018        | \                                        | \                                  | *                                     | *                                                 | \                    | *                     | \                                           | *                     | 4                  |
| <i>Langabeer</i>    | 2018        | *                                        | *                                  | *                                     | *                                                 | *                    | *                     | \                                           | *                     | 7                  |
| <i>Tang</i>         | 2018        | \                                        | \                                  | *                                     | *                                                 | **                   | *                     | *                                           | *                     | 7                  |
| <i>Cenko</i>        | 2019        | *                                        | *                                  | *                                     | *                                                 | **                   | *                     | \                                           | *                     | 8                  |
| <i>Hao</i>          | 2019        | *                                        | *                                  | *                                     | *                                                 | **                   | *                     | \                                           | *                     | 8                  |
| <i>Hannan</i>       | 2019        | *                                        | *                                  | *                                     | *                                                 | **                   | *                     | \                                           | *                     | 8                  |
| <i>Maznyczka</i>    | 2019        | \                                        | \                                  | *                                     | *                                                 | \                    | *                     | *                                           | *                     | 5                  |

1  
2  
3  
4  
5  
6  
7  
8  
9  
10  
11  
12  
13  
14  
15  
16  
17  
18  
19  
20  
21  
22  
23  
24  
25  
26  
27  
28  
29  
30  
31  
32  
33  
34  
35  
36  
37  
38  
39  
40  
41  
42  
43  
44  
45  
46

| <i>a</i>        |      |   |   |   |   |    |   |   |   |   |
|-----------------|------|---|---|---|---|----|---|---|---|---|
| <i>Stehli</i>   | 2019 | * | * | * | * | ** | * | \ | * | 8 |
| <i>Burgess</i>  | 2020 | \ | \ | * | * | ** | * | * | * | 7 |
| <i>Dharma</i>   | 2020 | \ | \ | * | * | *  | * | * | * | 6 |
| <i>Kerkmanx</i> | 2020 | * | * | * | * | \  | * | * | * | 7 |
| <i>Siabani</i>  | 2020 | \ | \ | * | * | *  | * | \ | * | 5 |
| <i>Tai</i>      | 2020 | \ | \ | * | * | ** | * | * | * | 7 |
| <i>Tizón</i>    | 2020 | * | * | * | * | ** | * | * | * | 9 |

eFigure 1 Meta-influence analysis for unadjusted short-term mortality

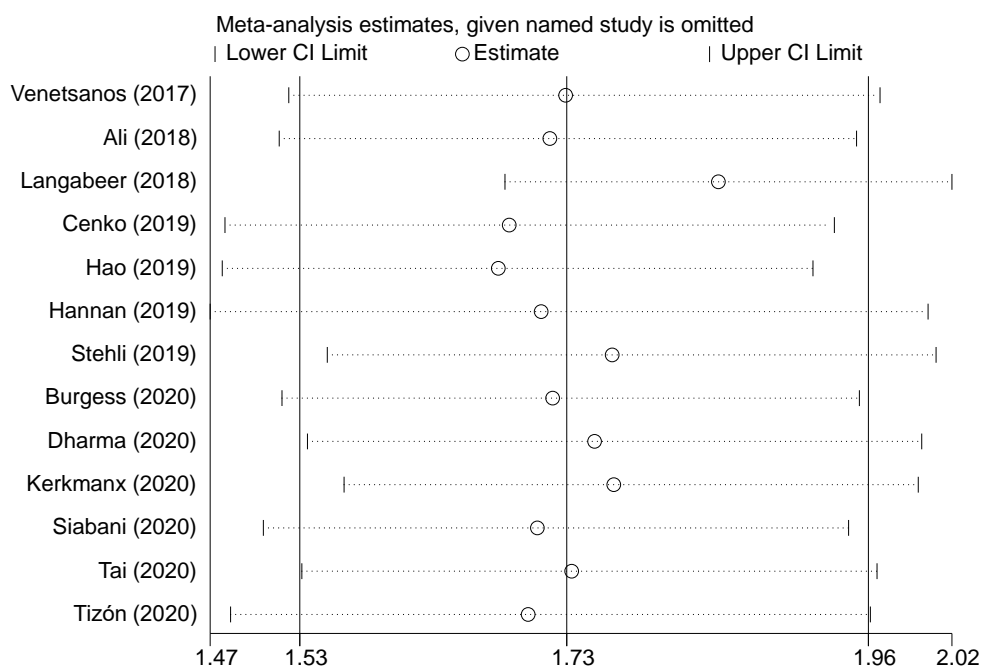

eFigure 2 Meta-influence analysis for unadjusted long-term mortality

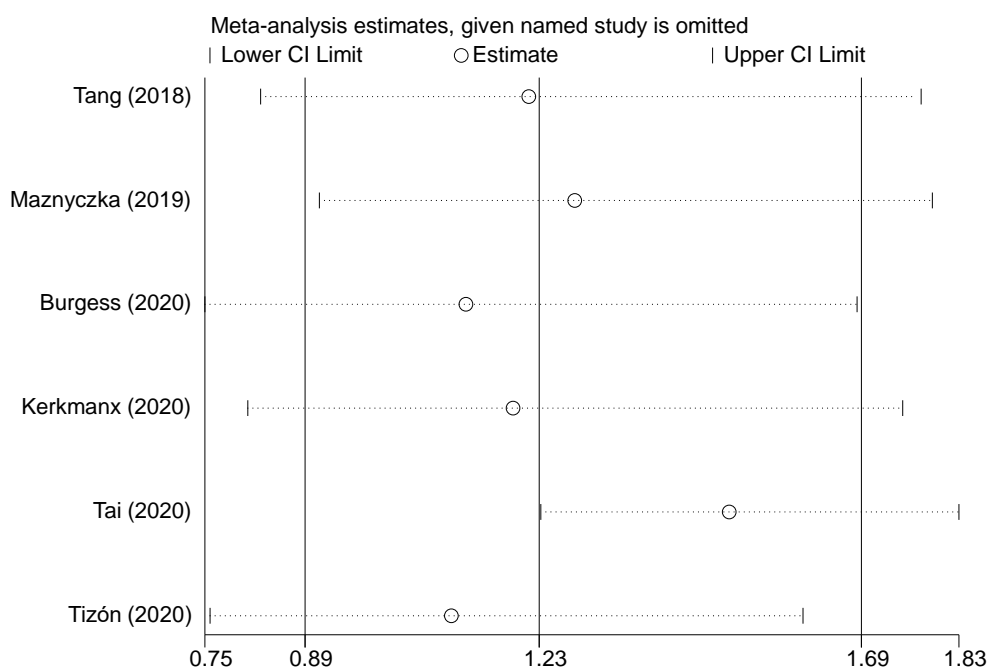

eFigure 3 Funnel plots for publication bias for unadjusted short-term (A) and long-term (B) mortality

A

1  
2  
3  
4  
5  
6  
7  
8  
9  
10  
11  
12  
13  
14  
15  
16  
17  
18  
19  
20  
21  
22  
23  
24  
25  
26  
27  
28  
29  
30  
31  
32  
33  
34  
35  
36  
37  
38  
39  
40  
41  
42  
43  
44  
45  
46  
47  
48  
49  
50  
51  
52  
53  
54  
55  
56  
57  
58  
59  
60

Begg's funnel plot with pseudo 95% confidence limits

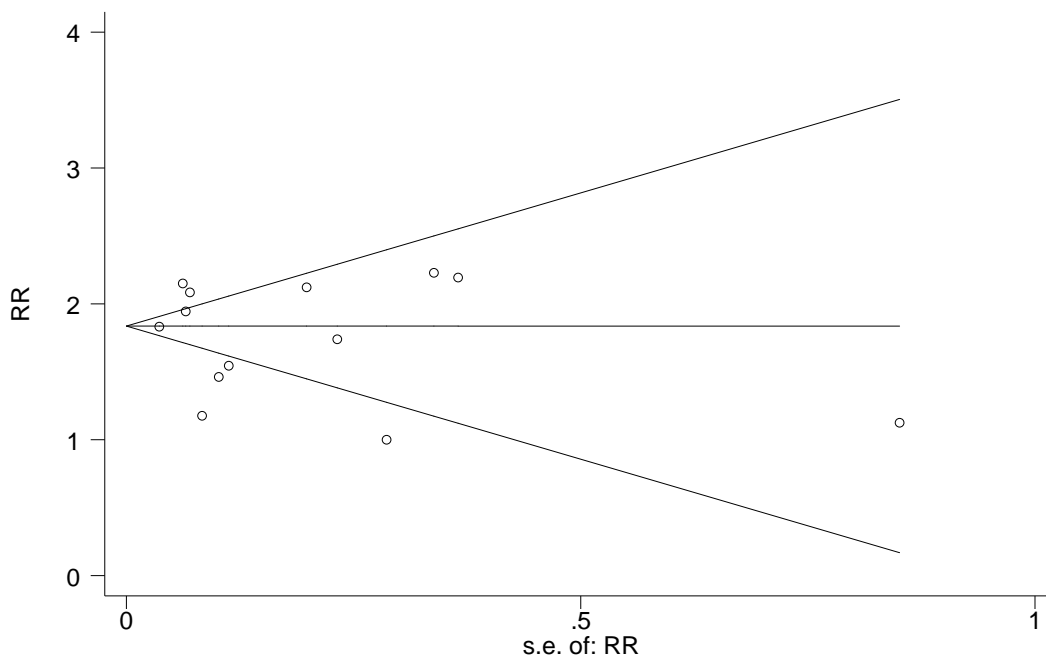

B

Begg's funnel plot with pseudo 95% confidence limits

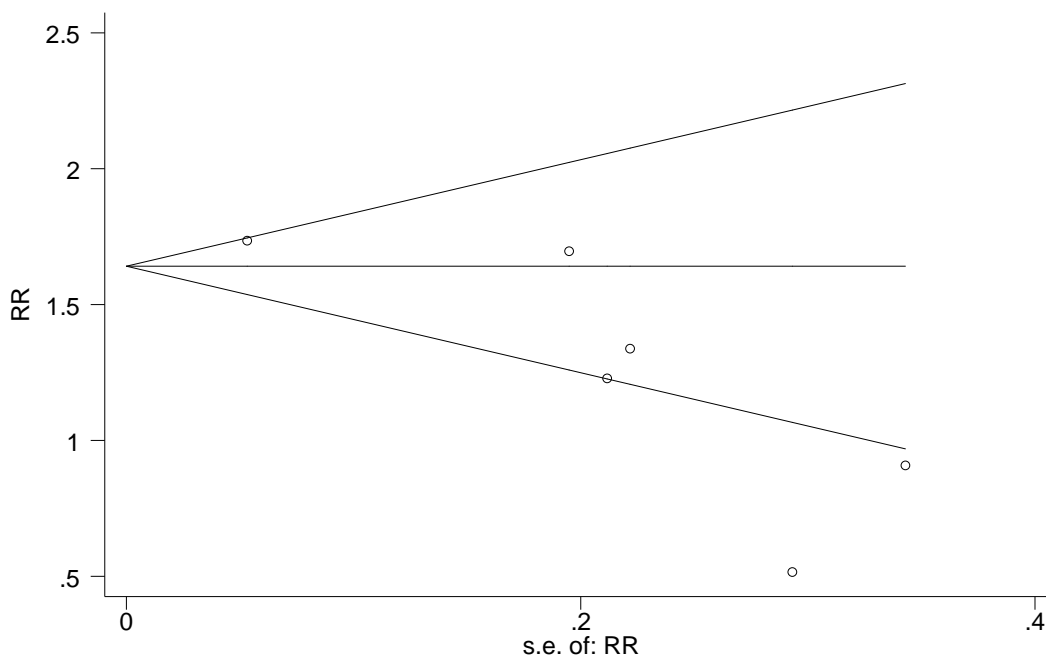

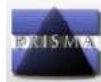

## PRISMA 2020 Checklist

| Section and Topic             | Item # | Checklist item                                                                                                                                                                                                                                                                                       | Location where item is reported |
|-------------------------------|--------|------------------------------------------------------------------------------------------------------------------------------------------------------------------------------------------------------------------------------------------------------------------------------------------------------|---------------------------------|
| <b>TITLE</b>                  |        |                                                                                                                                                                                                                                                                                                      |                                 |
| Title                         | 1      | Identify the report as a systematic review.                                                                                                                                                                                                                                                          | Title                           |
| <b>ABSTRACT</b>               |        |                                                                                                                                                                                                                                                                                                      |                                 |
| Abstract                      | 2      | See the PRISMA 2020 for Abstracts checklist.                                                                                                                                                                                                                                                         | Abstract                        |
| <b>INTRODUCTION</b>           |        |                                                                                                                                                                                                                                                                                                      |                                 |
| Rationale                     | 3      | Describe the rationale for the review in the context of existing knowledge.                                                                                                                                                                                                                          | Page 4                          |
| Objectives                    | 4      | Provide an explicit statement of the objective(s) or question(s) the review addresses.                                                                                                                                                                                                               | Page 4                          |
| <b>METHODS</b>                |        |                                                                                                                                                                                                                                                                                                      |                                 |
| Eligibility criteria          | 5      | Specify the inclusion and exclusion criteria for the review and how studies were grouped for the syntheses.                                                                                                                                                                                          | Page 5                          |
| Information sources           | 6      | Specify all databases, registers, websites, organisations, reference lists and other sources searched or consulted to identify studies. Specify the date when each source was last searched or consulted.                                                                                            | Page 4                          |
| Search strategy               | 7      | Present the full search strategies for all databases, registers and websites, including any filters and limits used.                                                                                                                                                                                 | Page 4                          |
| Selection process             | 8      | Specify the methods used to decide whether a study met the inclusion criteria of the review, including how many reviewers screened each record and each report retrieved, whether they worked independently, and if applicable, details of automation tools used in the process.                     | Page 5                          |
| Data collection process       | 9      | Specify the methods used to collect data from reports, including how many reviewers collected data from each report, whether they worked independently, any processes for obtaining or confirming data from study investigators, and if applicable, details of automation tools used in the process. | Page 5                          |
| Data items                    | 10a    | List and define all outcomes for which data were sought. Specify whether all results that were compatible with each outcome domain in each study were sought (e.g. for all measures, time points, analyses), and if not, the methods used to decide which results to collect.                        | Page 5                          |
|                               | 10b    | List and define all other variables for which data were sought (e.g. participant and intervention characteristics, funding sources). Describe any assumptions made about any missing or unclear information.                                                                                         | Page 5                          |
| Study risk of bias assessment | 11     | Specify the methods used to assess risk of bias in the included studies, including details of the tool(s) used, how many reviewers assessed each study and whether they worked independently, and if applicable, details of automation tools used in the process.                                    | Page 5                          |
| Effect measures               | 12     | Specify for each outcome the effect measure(s) (e.g. risk ratio, mean difference) used in the synthesis or presentation of results.                                                                                                                                                                  | Page 5                          |
| Synthesis methods             | 13a    | Describe the processes used to decide which studies were eligible for each synthesis (e.g. tabulating the study intervention characteristics and comparing against the planned groups for each synthesis (item #5)).                                                                                 | Page 5                          |
|                               | 13b    | Describe any methods required to prepare the data for presentation or synthesis, such as handling of missing summary statistics, or data conversions.                                                                                                                                                | Page 5                          |
|                               | 13c    | Describe any methods used to tabulate or visually display results of individual studies and syntheses.                                                                                                                                                                                               | Page 5                          |
|                               | 13d    | Describe any methods used to synthesize results and provide a rationale for the choice(s). If meta-analysis was performed, describe the model(s), method(s) to identify the presence and extent of statistical heterogeneity, and software package(s) used.                                          | Page 5                          |
|                               | 13e    | Describe any methods used to explore possible causes of heterogeneity among study results (e.g. subgroup analysis, meta-regression).                                                                                                                                                                 | Page 5                          |
|                               | 13f    | Describe any sensitivity analyses conducted to assess robustness of the synthesized results.                                                                                                                                                                                                         | Page 5                          |
| Reporting bias assessment     | 14     | Describe any methods used to assess risk of bias due to missing results in a synthesis (arising from reporting biases).                                                                                                                                                                              | Page 5                          |
| Certainty assessment          | 15     | Describe any methods used to assess certainty (or confidence) in the body of evidence for an outcome.                                                                                                                                                                                                | Page 5                          |

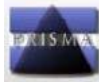

## PRISMA 2020 Checklist

1  
2  
3  
4  
5  
6  
7  
8  
9  
10  
11  
12  
13  
14  
15  
16  
17  
18  
19  
20  
21  
22  
23  
24  
25  
26  
27  
28  
29  
30  
31  
32  
33  
34  
35  
36  
37  
38  
39  
40  
41  
42  
43  
44  
45  
46  
47

| Section and Topic                              | Item # | Checklist item                                                                                                                                                                                                                                                                       | Location where item is reported |
|------------------------------------------------|--------|--------------------------------------------------------------------------------------------------------------------------------------------------------------------------------------------------------------------------------------------------------------------------------------|---------------------------------|
| <b>RESULTS</b>                                 |        |                                                                                                                                                                                                                                                                                      |                                 |
| Study selection                                | 16a    | Describe the results of the search and selection process, from the number of records identified in the search to the number of studies included in the review, ideally using a flow diagram.                                                                                         | Figure 1                        |
|                                                | 16b    | Cite studies that might appear to meet the inclusion criteria, but which were excluded, and explain why they were excluded.                                                                                                                                                          | Page 6                          |
| Study characteristics                          | 17     | Cite each included study and present its characteristics.                                                                                                                                                                                                                            | Table 1                         |
| Risk of bias in studies                        | 18     | Present assessments of risk of bias for each included study.                                                                                                                                                                                                                         | Page 7                          |
| Results of individual studies                  | 19     | For all outcomes, present, for each study: (a) summary statistics for each group (where appropriate) and (b) an effect estimate and its precision (e.g. confidence/credible interval), ideally using structured tables or plots.                                                     | Table 2                         |
| Results of syntheses                           | 20a    | For each synthesis, briefly summarise the characteristics and risk of bias among contributing studies.                                                                                                                                                                               | Page 6                          |
|                                                | 20b    | Present results of all statistical syntheses conducted. If meta-analysis was done, present for each the summary estimate and its precision (e.g. confidence/credible interval) and measures of statistical heterogeneity. If comparing groups, describe the direction of the effect. | Page 6                          |
|                                                | 20c    | Present results of all investigations of possible causes of heterogeneity among study results.                                                                                                                                                                                       | Page 6                          |
|                                                | 20d    | Present results of all sensitivity analyses conducted to assess the robustness of the synthesized results.                                                                                                                                                                           | Page 7                          |
| Reporting biases                               | 21     | Present assessments of risk of bias due to missing results (arising from reporting biases) for each synthesis assessed.                                                                                                                                                              | Page 7                          |
| Certainty of evidence                          | 22     | Present assessments of certainty (or confidence) in the body of evidence for each outcome assessed.                                                                                                                                                                                  | Page 6                          |
| <b>DISCUSSION</b>                              |        |                                                                                                                                                                                                                                                                                      |                                 |
| Discussion                                     | 23a    | Provide a general interpretation of the results in the context of other evidence.                                                                                                                                                                                                    | Page 7                          |
|                                                | 23b    | Discuss any limitations of the evidence included in the review.                                                                                                                                                                                                                      | Page 8-9                        |
|                                                | 23c    | Discuss any limitations of the review processes used.                                                                                                                                                                                                                                | Page 8-9                        |
|                                                | 23d    | Discuss implications of the results for practice, policy, and future research.                                                                                                                                                                                                       | Page 7-8                        |
| <b>OTHER INFORMATION</b>                       |        |                                                                                                                                                                                                                                                                                      |                                 |
| Registration and protocol                      | 24a    | Provide registration information for the review, including register name and registration number, or state that the review was not registered.                                                                                                                                       |                                 |
|                                                | 24b    | Indicate where the review protocol can be accessed, or state that a protocol was not prepared.                                                                                                                                                                                       |                                 |
|                                                | 24c    | Describe and explain any amendments to information provided at registration or in the protocol.                                                                                                                                                                                      |                                 |
| Support                                        | 25     | Describe sources of financial or non-financial support for the review, and the role of the funders or sponsors in the review.                                                                                                                                                        |                                 |
| Competing interests                            | 26     | Declare any competing interests of review authors.                                                                                                                                                                                                                                   |                                 |
| Availability of data, code and other materials | 27     | Report which of the following are publicly available and where they can be found: template data collection forms; data extracted from included studies; data used for all analyses; analytic code; any other materials used in the review.                                           |                                 |

From: Page MJ, McKenzie JE, Bossuyt PM, Boutron I, Hoffmann TC, Mulrow CD, et al. The PRISMA 2020 statement: an updated guideline for reporting systematic reviews. *BMJ* 2021;372:n71. doi: 10.1136/bmj.n71

For peer review only - <http://bmjopen.bmj.com/site/about/guidelines.xhtml>  
For more information, visit: <http://www.prisma-statement.org/>

# BMJ Open

## Contemporary sex differences in mortality among patients with ST-segment elevation myocardial infarction: a systematic review and meta-analysis

|                                 |                                                                                                                                                                                                                                                                                                                                                                                                                                                                                                                                                                                                 |
|---------------------------------|-------------------------------------------------------------------------------------------------------------------------------------------------------------------------------------------------------------------------------------------------------------------------------------------------------------------------------------------------------------------------------------------------------------------------------------------------------------------------------------------------------------------------------------------------------------------------------------------------|
| Journal:                        | <i>BMJ Open</i>                                                                                                                                                                                                                                                                                                                                                                                                                                                                                                                                                                                 |
| Manuscript ID                   | bmjopen-2021-053379.R1                                                                                                                                                                                                                                                                                                                                                                                                                                                                                                                                                                          |
| Article Type:                   | Original research                                                                                                                                                                                                                                                                                                                                                                                                                                                                                                                                                                               |
| Date Submitted by the Author:   | 06-Nov-2021                                                                                                                                                                                                                                                                                                                                                                                                                                                                                                                                                                                     |
| Complete List of Authors:       | Xi, Ziwei; Fuwai Hospital State Key Laboratory of Cardiovascular Disease<br>Qiu, Hong; Fuwai Hospital State Key Laboratory of Cardiovascular Disease<br>Guo, Tingting; Fuwai Hospital State Key Laboratory of Cardiovascular Disease<br>Wang, Yong; Fuwai Hospital State Key Laboratory of Cardiovascular Disease<br>Li, Jianan; Beijing Tiantan Hospital<br>Li, Yang; Fuwai Hospital State Key Laboratory of Cardiovascular Disease<br>Zheng, Jianfeng; Fuwai Hospital State Key Laboratory of Cardiovascular Disease<br>Gao, R; Fuwai Hospital State Key Laboratory of Cardiovascular Disease |
| <b>Primary Subject Heading</b>: | Epidemiology                                                                                                                                                                                                                                                                                                                                                                                                                                                                                                                                                                                    |
| Secondary Subject Heading:      | Emergency medicine                                                                                                                                                                                                                                                                                                                                                                                                                                                                                                                                                                              |
| Keywords:                       | EPIDEMIOLOGY, Coronary heart disease < CARDIOLOGY, Myocardial infarction < CARDIOLOGY                                                                                                                                                                                                                                                                                                                                                                                                                                                                                                           |
|                                 |                                                                                                                                                                                                                                                                                                                                                                                                                                                                                                                                                                                                 |

SCHOLARONE™  
Manuscripts

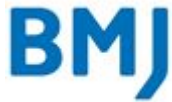

I, the Submitting Author has the right to grant and does grant on behalf of all authors of the Work (as defined in the below author licence), an exclusive licence and/or a non-exclusive licence for contributions from authors who are: i) UK Crown employees; ii) where BMJ has agreed a CC-BY licence shall apply, and/or iii) in accordance with the terms applicable for US Federal Government officers or employees acting as part of their official duties; on a worldwide, perpetual, irrevocable, royalty-free basis to BMJ Publishing Group Ltd ("BMJ") its licensees and where the relevant Journal is co-owned by BMJ to the co-owners of the Journal, to publish the Work in this journal and any other BMJ products and to exploit all rights, as set out in our [licence](#).

The Submitting Author accepts and understands that any supply made under these terms is made by BMJ to the Submitting Author unless you are acting as an employee on behalf of your employer or a postgraduate student of an affiliated institution which is paying any applicable article publishing charge ("APC") for Open Access articles. Where the Submitting Author wishes to make the Work available on an Open Access basis (and intends to pay the relevant APC), the terms of reuse of such Open Access shall be governed by a Creative Commons licence – details of these licences and which [Creative Commons](#) licence will apply to this Work are set out in our licence referred to above.

Other than as permitted in any relevant BMJ Author's Self Archiving Policies, I confirm this Work has not been accepted for publication elsewhere, is not being considered for publication elsewhere and does not duplicate material already published. I confirm all authors consent to publication of this Work and authorise the granting of this licence.



1  
2  
3  
4 **Contemporary sex differences in mortality among patients with ST-segment elevation**  
5  
6 **myocardial infarction: a systematic review and meta-analysis**  
7

8  
9 **Short title : Sex differences in STEMI**  
10

11 **Authors:**

12 Ziwei Xi<sup>1</sup>, Hong Qiu<sup>1</sup>, Tingting Guo<sup>2</sup>, Yong Wang<sup>1</sup>, Jianan Li<sup>3,1</sup>, Yang Li<sup>1</sup>, Jianfeng Zheng<sup>1</sup>,  
13  
14  
15  
16  
17 Runlin Gao<sup>1</sup>

18  
19 *1. Department of Cardiology, Coronary artery disease center, Fuwai Hospital, National*  
20  
21  
22 *Center for Cardiovascular Diseases, Chinese Academy of Medical Sciences and Peking*  
23  
24 *Union Medical College, Beijing, China*

25  
26  
27 *2. Thrombosis Center, National Center for Cardiovascular Diseases, State Key*  
28  
29  
30 *Laboratory of Cardiovascular Disease, Fuwai Hospital, Chinese Academy of Medical*  
31  
32 *Sciences and Peking Union Medical College, Beijing, China*

33  
34  
35 *3. Department of Cardiology and Macrovascular Disease, Beijing Tiantan Hospital,*  
36  
37 *Capital Medical University, Beijing, China*  
38  
39

40  
41  
42  
43 **Corresponding author:**

44 Prof. Hong Qiu, M.D.

45  
46 E-mail address: qiuHong6780@sina.com

47  
48  
49  
50  
51 Department and affiliation: Department of Cardiology, Coronary artery disease center,  
52  
53 Fuwai Hospital, National Center for Cardiovascular Diseases, Chinese Academy of  
54  
55 Medical Sciences and Peking Union Medical College, Beijing, China

56  
57  
58 Telephone: 0016-13261179000  
59  
60

Address: No.167 North Lishi Road, Xicheng District, Beijing, China

For peer review only

1  
2  
3  
4 **Contemporary sex differences in mortality among patients with ST-segment elevation**  
5  
6 **myocardial infarction: a systematic review and meta-analysis**  
7  
8  
9

10  
11  
12 **Objectives:** To assess the effect of sex differences on short- and long-term mortality among  
13  
14 patients with ST-segment elevation myocardial infarction (STEMI).  
15  
16

17  
18  
19 **Design:** Systematic review and meta-analysis of contemporary available evidence.  
20  
21  
22

23  
24  
25 **Setting:** PubMed, Embase and Cochrane Library were searched for relevant studies  
26  
27 reporting sex specific outcomes among patients with STEMI published between January  
28  
29 1, 2010 to August 1, 2020. Risk ratio (RR) 95% 95% confidence intervals (CIs) were  
30  
31 measured using DerSimonian and Laird random-effects model. Sensitivity analyses were  
32  
33 performed and publication bias was also checked. All statistical analyses were performed  
34  
35 using STATA version 15.0.  
36  
37  
38  
39

40  
41  
42  
43 **Participants:** Studies providing data about short- or long-term mortality stratified by sex in  
44  
45 patients with STEMI were included. Only study conducted in last ten years were included.  
46  
47  
48

49  
50  
51 **Primary and secondary outcome measures:** The primary outcome was all-cause death at  
52  
53 short-(in-hospital or 30 days) and long-term (at least 12 months) follow-up.  
54  
55

56  
57  
58 **Results**  
59  
60

1  
2  
3  
4 A total of fifteen studies involving 128,585 patients (31,706 [24.7%] female and 96,879  
5  
6 [75.3%] male) were included. In the unadjusted analyses, female were at a higher risk of  
7  
8 short-term mortality (RR, 1.73; 95%CI, 1.53-1.96,  $P<0.001$ ,  $I^2=77\%$ ) but not long-term  
9  
10 mortality (RR, 1.23; 95%CI, 0.89-1.69,  $P=0.206$ ,  $I^2=77.5\%$ ). When adjusted effect  
11  
12 estimates from individual studies were used in meta-analysis, the association between  
13  
14 female and higher risk of short-term mortality remained significant (RR, 1.24; 95%CI, 1.11-  
15  
16 1.38,  $P<0.001$ ,  $I^2=39.6\%$ ). And adjusted long-term mortality was also similar between  
17  
18 female and male (RR, 1.11; 95%CI, 0.42-1.80,  $P=0.670$ ,  $I^2=74.5\%$ ).  
19  
20  
21  
22  
23  
24  
25  
26  
27

## 28 **Conclusions**

29  
30 An increased short- but not long-term mortality was found in female with STEMI. After  
31  
32 adjustment for baseline cardiovascular risk factors and clinical profiles, short-term mortality  
33  
34 remains higher in female with STEMI compared to male, indicating the need for further  
35  
36 improvements in management in female patients.  
37  
38  
39  
40  
41  
42  
43  
44  
45  
46  
47  
48  
49  
50  
51  
52  
53  
54  
55  
56  
57  
58  
59  
60

#### Strengths and limitations of this study

- ♦ We assessed the contemporary effect of sex differences on mortality among patients with STEMI by meta-analysis of studies from the last decade.
- ♦ A greater number of potentially eligible articles were screened and the large sample size ensures adequate statistical power to detect even a small effect of interest.
- ♦ Sensitivity analyses by excluding one study at a time and restricting to studies with high quality or with large sample size got consistent results.
- ♦ Substantial and nonnegligible heterogeneity still exist in our meta-analysis and might result in potential bias.
- ♦ Residual confounding bias could not be totally excluded due to the observational study design of most included studies.

# Contemporary sex differences in short- and long-term mortality among patients with ST-segment elevation myocardial infarction: a systematic review and meta-analysis

## Introduction

Acute myocardial infarction remains one of leading causes of mortality in both men and women worldwide despite improvement of acute cardiac care.<sup>1</sup> Numerous studies have reported that women have a higher risk of in-hospital and long-term adverse outcomes following ST-segment elevation myocardial infarction (STEMI) compared with men.<sup>2</sup> Confounders including advanced age and more frequent comorbidities, such as hypertension and diabetes mellitus<sup>3 4</sup>, might contribute to excess mortality in women. Moreover, previous studies show lower rates of guideline directed medical therapy and revascularization are also associated with poorer prognosis for women with STEMI.<sup>5</sup>

Sex discrepancies in management and outcomes after STEMI have been increasingly reported in the literature and raised public awareness.<sup>6</sup> Major progress in therapy for myocardial infarction and primary and secondary preventive interventions has been made to reduce cardiovascular mortality for women.<sup>1 7</sup> And there have been marked reductions in cardiovascular disease mortality in women with acute myocardial infarction in the past two decades.<sup>1</sup> Conflicting results are noted in recent studies on sex differences following STEMI. It is unclear whether the sex differences still exist, in view of substantial improvements in prognosis of cardiovascular disease over the past decade.

In order to assess the contemporary effect of sex differences on short- and long-term

1  
2  
3  
4 mortality among patients with STEMI, we performed a systematic review and meta-  
5  
6 analysis of all available evidence from last decade reporting sex-specific outcomes after  
7  
8 STEMI.  
9  
10

## 11 12 13 14 **Methods**

15  
16  
17  
18  
19 The present systematic review and meta-analysis was performed following the principle  
20  
21 of the Preferred Reporting Items for Systematic Reviews and Meta-Analyses (PRISMA)  
22  
23 statement.<sup>8</sup>  
24  
25  
26  
27  
28  
29

### 30 *Literature search*

31  
32 We conducted a comprehensive search of the PubMed, EMBASE, and Cochrane Library  
33  
34 from January 1, 2010 to August 1, 2020 to identify studies from the last decade that  
35  
36 described sex differences in in short- or long-term mortality among patients with STEMI.  
37  
38 Both observational studies and randomized clinical trials were eligible. We queried MeSH  
39  
40 and the abstract text for the following three search terms: gender part (including "gender",  
41  
42 "female", "male", "gender differences", "sex differences" or "sex characteristics"); outcome  
43  
44 part (including "death", "mortality", "hospital mortality", "cardiac death", "sudden cardiac  
45  
46 death", "all-cause mortality", "long term mortality", "one year mortality", "cardiovascular  
47  
48 mortality" or "short term mortality"); myocardial infarction part (including "myocardial  
49  
50 infarction", "acute myocardial infarction", "myocardial necrosis", "ST segment elevation  
51  
52 myocardial infarction", "primary PCI", "primary percutaneous coronary intervention" or  
53  
54  
55  
56  
57  
58  
59  
60

1  
2  
3  
4 "primary angioplasty") to identify relevant studies. There was no language restriction or  
5  
6 age limit.  
7  
8  
9

### 10 11 *Study selection*

12  
13  
14 According to the aim of our analyses, studies were included in this systematic review if  
15  
16 data about short- (in-hospital or 30 days) or long-term (at least 12 months) mortality  
17  
18 stratified by sex in patients with STEMI were reported. Two reviewers identified studies  
19  
20 eligible for further review by performing an initial screen of titles or abstracts of the search  
21  
22 results. Subsequently, a second screen of full texts eligibility was performed by another  
23  
24 two reviewers. Studies had to fulfil the following criteria to be included in the present  
25  
26 analyses: i) studies reporting data on all-cause mortality specific to STEMI population; and  
27  
28 ii) studies providing enough details to obtain numbers of events or incidence rates  
29  
30 according to sex; and iii) enrollment starting earlier than a decade ago. Editorials, letters,  
31  
32 conference proceedings and abstracts were considered to be eligible only if sufficient  
33  
34 information was available in abstracts or associated tables or figures. We excluded studies  
35  
36 if they were review articles or case reports, or if they involved pregnant participants,  
37  
38 critically ill patients, or provided insufficient data to allow for risk estimates to be calculated.  
39  
40  
41  
42  
43  
44  
45  
46  
47  
48 Any disagreement was reviewed by a third reviewer and resolved by consensus.  
49  
50  
51  
52

### 53 *Data extraction*

54  
55  
56 Detailed data from selected studies were extracted independently by two reviewers using  
57  
58 a standardized form independently. Data about study and participants characteristics,  
59  
60



1  
2  
3  
4 including year of study, sample size, time of enrollment, geographical location, endpoints  
5  
6 of study, and follow-up duration, were collected. Any discrepancies were reviewed by a  
7  
8 third reviewer and resolved by consensus. The quality of included studies was evaluated  
9  
10 by Newcastle-Ottawa scale using prespecified items comprised of patients' selection  
11  
12 (representativeness and selection of patients, ascertainment of exposure), comparability  
13  
14 of cohorts based on design or analysis, and outcome (assessment of outcomes, adequacy  
15  
16 of follow-up).<sup>9</sup> A quality score (0–9 points) was generated according to a maximum of 1  
17  
18 point for each item.  
19  
20  
21  
22  
23  
24  
25  
26  
27

#### 28 *Patient and public involvement*

29  
30 Due to the nature of the systematic review and meta-analysis, this study did not involve  
31  
32 patients and the public in the design, or conduct, or reporting or dissemination plans.  
33  
34  
35  
36  
37

#### 38 *Statistical analysis*

39  
40 The risk ratios (RRs) and 95% confidence interval (CI) were primarily used to represent  
41  
42 the effect of sex differences on mortality after STEMI. And data were combined using  
43  
44 random-effects model of DerSimonian and Laird with inverse variance weighting. Random-  
45  
46 effect model was used due to substantial clinical and statistical heterogeneity. Following  
47  
48 analyses were performed: i) unadjusted RRs for short- and long-term all-cause mortality  
49  
50 using raw number of death and total participants at risk for death specific to each sex, ii)  
51  
52 adjusted RRs for short- and long-term all-cause mortality using adjusted RRs if they were  
53  
54 described in those included studies.  
55  
56  
57  
58  
59  
60

1  
2  
3  
4 We assess heterogeneity across studies with Cochran's Q test and I2 test, with  $P < 0.1$  or  
5  
6 I2  $> 50\%$  considered significant. We also performed meta-regression to identify the  
7  
8 potential sources of heterogeneity in the included studies. Furthermore, stratified analysis  
9  
10 was conducted as well by dividing the included studies into different subgroups based on  
11  
12 the Newcastle-Ottawa scale scores ( $> 7$  points or  $\leq 7$  points) to assess the potential sources  
13  
14 of heterogeneity. To assess the potential effect of publication bias, we inspected funnel  
15  
16 plots for asymmetry and used the Egger's regression asymmetry test in which  $P < 0.05$  was  
17  
18 considered to indicate significant publication bias.  
19  
20  
21  
22  
23

24 Sensitivity analyses was conducted by excluding one study at a time and comparing the  
25  
26 results with the complete one. In addition, we also performed sensitivity analyses by  
27  
28 restricting to high-quality studies with a Newcastle-Ottawa scale of 5 points or more and  
29  
30 restricting to studies with sample size bigger than 1000 participants. All statistical analyses  
31  
32 were performed using STATA version 15.0 (Stata Corp, College Station, TX). Differences  
33  
34 were considered statistically significant at  $P < .05$  (2-sided).  
35  
36  
37  
38  
39  
40  
41  
42

## 43 Results

### 44 45 46 47 48 *Literature search*

49  
50 Study selection details were outlined in Figure 1. The literature search identified 2,611  
51  
52 potentially relevant articles. After screening based on title and abstract review, 2495  
53  
54 records were excluded. A total of 116 full-text were finally assessed for eligibility, with 96  
55  
56 papers excluded due to enrollment starting earlier than a decade ago or no sufficient  
57  
58  
59  
60

1  
2  
3  
4 gender specific data to analyze. Another 5 papers reviewed in detail were excluded after  
5  
6 due to data from the same cohorts. A total of 15 studies were finally included in the present  
7  
8  
9 systematic review and meta-analysis.<sup>10-24</sup>  
10  
11  
12  
13

#### 14 *Study characteristics*

15  
16  
17 Of the 15 included studies, 8 were multicenter studies and 4 studies enrolled more than  
18  
19 10,000 patients with STEMI. See Table 1 for further information of included studies.  
20  
21  
22 Baseline characteristics of participants were missing in some included studies, but all  
23  
24 included studies provided sufficient data for analysis of sex differences in clinical outcomes.  
25  
26  
27 Except for 1 study, which was a prespecified gender analysis of randomized controlled  
28  
29 trial, the remaining 14 were observational studies. Among the 10 included studies which  
30  
31 reported adjusted analyses, most studied adjusted for age, diabetes mellitus, hypertension,  
32  
33 and prior myocardial infarction/PCI, while some adjusted for renal insufficiency,  
34  
35 and prior myocardial infarction/PCI, while some adjusted for renal insufficiency,  
36  
37 cardiogenic shock, cardiac arrest at admission and occurrence time of symptom onset.  
38  
39  
40 Variables that were adjusted in the adjusted analyses from the included studies were  
41  
42 presented in eTable 1 of the Supplementary Material. Results of assessment of study  
43  
44 quality using Newcastle-Ottawa scale were shown in eTable 2 in the Supplementary  
45  
46  
47  
48 Material.  
49  
50  
51  
52

#### 53 *Patient characteristics*

54  
55  
56 A total of 128,585 patients with STEMI (31,706 [24.7%] female and 96,879 [75.3%] male)  
57  
58 were involved in the 15 included studies. Female tended to be older and had higher  
59  
60

1  
2  
3  
4 prevalence of diabetes mellitus in all included studies. And in most studies, other important  
5  
6 comorbidities, including hypertension and hyperlipidemia, were more frequent in female.  
7  
8 Greater proportions of male were smokers and had prior PCI or myocardial infarction.  
9  
10 Besides, some studies reported that door-to-balloon time and symptom onset to balloon  
11  
12 time were longer in female than male. Part of patient baseline characteristics were  
13  
14 summarized in Table 2.  
15  
16  
17  
18  
19  
20  
21

### 22 *Short-term all-cause mortality*

23  
24 Thirteen studies reported sex-specific unadjusted short-term mortality of patients with  
25  
26 STEMI. There were 2,873 of 31,409 (9.1%) cases of all-cause mortality in female  
27  
28 compared with 4,380 of 95,610 (4.6%) in male. Female were at a significantly higher risk  
29  
30 of short-term mortality (RR, 1.73; 95%CI, 1.53-1.96,  $P<0.001$ ,  $I^2=77\%$ ) compared with male  
31  
32 (Figure 2 A). Nine studies involving 119,379 patients reported adjusted short-term mortality  
33  
34 specific to sex. In adjusted analysis, the association between female and higher risk of  
35  
36 short-term mortality remained significant (RR, 1.24; 95%CI, 1.11-1.38,  $P<0.001$ ,  $I^2=39.6\%$ )  
37  
38 (Figure 2 B). However, the strength of association calculated with adjusted RRs from these  
39  
40 9 studies was attenuated. Subgroup analysis demonstrated that the results of studies with  
41  
42 Newcastle-Ottawa scale  $>7$  points (RR, 1.90; 95%CI, 1.73-2.09,  $P=0.018$ ,  $I^2=63.4\%$ ) and  
43  
44 studies with  $\leq 7$  points (RR, 1.52; 95%CI, 1.20-1.93,  $P=0.026$ ,  $I^2=58.1\%$ ) were consistent  
45  
46 in unadjusted short-term mortality (See eFigure 1 in the Supplementary Material).  
47  
48  
49  
50  
51  
52  
53  
54  
55  
56  
57  
58  
59  
60

### *Long-term all-cause mortality*

1  
2  
3  
4 Six studies involved 18,018 patients with STEMI (4,191 female and 13,827 male) and  
5  
6 followed up for more than 1 year, and reported all-cause mortality for female and male.  
7  
8  
9 The incidence of long-term all-cause mortality was 13.9% (n=584) in female and 8.7%  
10  
11 (n=1202) in male. In unadjusted analysis, no significant sex difference was found in long-  
12  
13 term mortality (RR, 1.23; 95%CI, 0.89-1.69, P=0.206, I<sup>2</sup>=77.5%) (Figure 3 A). And the  
14  
15 adjusted analysis of the pooled results from four studies, also showed a similar risk of  
16  
17 mortality at long-term follow-up in female compared with male (RR, 1.11; 95%CI, 0.42-1.80,  
18  
19 P=0.670, I<sup>2</sup>=74.5%) (Figure 3 B).  
20  
21  
22  
23  
24  
25  
26  
27

#### 28 *Meta-Regression Analysis, sensitivity analyses and publication bias*

29  
30 According to meta-regression analysis, differences in prevalence of diabetes ( $\beta$  coefficient,  
31  
32 0.248; P=0.337), hypertension ( $\beta$  coefficient, -0.255; P=0.538), hyperlipidemia ( $\beta$   
33  
34 coefficient, 0.260; P=0.415), smoking ( $\beta$  coefficient, -0.040; P=0.255), prior MI ( $\beta$   
35  
36 coefficient, -2.725; P=0.126), and prior PCI ( $\beta$  coefficient, 0.109; P=0.896) between sexes  
37  
38 were not identified as significant sources of heterogeneity for short-term all-cause mortality.  
39  
40 Given that not all included study provided information on confounders stratified by sex, the  
41  
42 results of meta-regression analyses should be interpreted with caution.  
43  
44  
45  
46  
47

48 Sensitivity analysis by excluding one study at a time (See eFigure 2 in the Supplementary  
49  
50 Material) or restricted to data from studies with sample size bigger than 1000 (RR, 1.75;  
51  
52 95%CI, 1.54-1.99, P<.001, I<sup>2</sup>=82.9%) both indicated that none of the studies affected the  
53  
54 results of short-term mortality in this meta-analysis significantly. In analysis for long-term  
55  
56 mortality, sensitivity analysis showed a possibly higher influence on the result attribute to  
57  
58  
59  
60

1  
2  
3  
4 the study of Tai et al (See eFigure 3 in the Supplementary Material). After removing this  
5  
6 study from meta-analysis, the association of female with increased long-term mortality  
7  
8 became significant (RR, 1.50; 95%CI, 1.23-1.83, P=0.148, I<sup>2</sup>=40.9%). We found no  
9  
10 evidence of publication bias across studies based on visual inspection of funnel plots (See  
11  
12 eFigure 4 in the Supplementary Material) and the results from Egger's tests for short-term  
13  
14 mortality (P=0.462) and for long-term mortality (P=0.053).  
15  
16  
17  
18  
19  
20  
21

## 22 Discussion:

23  
24  
25  
26  
27 Our systematic review and meta-analysis of contemporary literature on sex differences  
28  
29 among patients with STEMI demonstrate that female have a higher risk of short- but not  
30  
31 long-term mortality compared with male with STEMI. Furthermore, after adjustment for  
32  
33 baseline cardiovascular risk factors and clinical profiles, the sex differences in short-term  
34  
35 mortality are attenuated but remain significant, while female have the similar long-term  
36  
37 mortality with male.  
38  
39  
40  
41  
42  
43  
44

45 Our results are somewhat in accordance with several previously published meta-analysis.<sup>2</sup>

46  
47  
48 <sup>25</sup> A considerable number of studies have consistently suggested that women were at a  
49  
50 higher risk of short-term mortality after ACS. However, whether risk of long-term mortality  
51  
52 is also higher in women with ACS remains under debate. Some studies indicated that  
53  
54 women with STEMI had a higher 1-year rate of death compared to men<sup>26</sup>, while the 1-year  
55  
56 mortality rate was conversely lower in women than men in some other studies<sup>23 24</sup>. In our  
57  
58  
59  
60

1  
2  
3  
4 study, with respect to short-term mortality, the analyses of studies with high or low quality,  
5  
6 and big or small sample size yielded similar results. However, in terms of long-term  
7  
8 mortality, caution is needed when interpreting our finding of non-significant increased long-  
9  
10 term mortality in adjusted analyses, due to the results of sensitivity analysis which showed  
11  
12 a significant association between female and increased long-term mortality after removing  
13  
14 one study from adjusted analyses.  
15  
16  
17  
18  
19  
20  
21

22 It is widely accepted that there are significant differences in outcomes of women and men  
23  
24 with acute myocardial infarction. In our study, after adjusted for participants' baseline  
25  
26 cardiovascular risk factors and clinical profiles, the strength of association between gender  
27  
28 and short-term mortality was substantially attenuated, which suggested that poorer  
29  
30 baseline cardiovascular risk profile partially explained the impact of sex differences on  
31  
32 mortality. Multiple studies have shown that women with STEMI present at older age and  
33  
34 have a higher burden of comorbidities, contributing to the sex differences in mortality after  
35  
36 STEMI.<sup>27</sup> All studies included in our meta-analysis demonstrate that female patients are  
37  
38 older and with more diabetes mellitus as well as hypertension. In addition, some sex-  
39  
40 specific studies found that certain risk factors and comorbidities were more potent in  
41  
42 women.<sup>28</sup> Diabetes mellitus , hypertension and smoking status are more strongly  
43  
44 associated with increased risk of cardiac events in women compared with men.<sup>27 29</sup>  
45  
46  
47  
48  
49  
50  
51  
52  
53  
54  
55

56 Notably, that these differences mentioned above still could not completely explain the gap  
57  
58 in mortality between sexes. It has been proved that women with acute myocardial infarction  
59  
60

1  
2  
3  
4 were less likely to be treated with guideline directed medical therapy and less likely to  
5  
6 receive primary reperfusion therapy including primary percutaneous coronary intervention  
7  
8 or fibrinolysis.<sup>30</sup> Regarding medical therapy, numerous studies conducted around the world  
9  
10 consistently demonstrate female survivors are receiving less optimal medical therapy after  
11  
12 acute myocardial infarction during hospitalization or at discharge.<sup>31 32</sup> Though there might  
13  
14 be no differences in treatment adherence between men and women, some studies report  
15  
16 significant sex disparities in initiation of appropriate pharmacotherapy after myocardial  
17  
18 infarction.<sup>33</sup> Results from these observational studies have shown women are receiving  
19  
20 less optimal medical therapy including aspirin, statins, and angiotensin-converting enzyme  
21  
22 inhibitors in all age groups, especially young women, and suggested that clinicians and  
23  
24 patients may benefit from better education and awareness of undertreatment of younger  
25  
26 women.<sup>33 34</sup>

27  
28  
29  
30  
31  
32  
33  
34  
35  
36  
37 Lower rates of revascularization are observed among women with STEMI compared with  
38  
39 men in several studies despite proven benefit of this therapy.<sup>35</sup> Moreover, the sex  
40  
41 differences might be driven by delays in presentation to hospital and women with STEMI  
42  
43 were more likely to experience longer delays than men. Although a great improvement in  
44  
45 emergency medical services and timely revascularization over the past decades, recent  
46  
47 studies show that women with STEMI still present later and have a longer ischemic time  
48  
49 than men. Previous studies have shown consistently that women have longer door-to  
50  
51 balloon times and longer door-to needle times.<sup>36 37</sup> In addition, women are also more likely  
52  
53 to exhibit longer pre-hospital delays in seeking medical care after the development of  
54  
55  
56  
57  
58  
59  
60



1  
2  
3  
4 symptoms suggestive of myocardial infarction. Although there have been significant  
5  
6 reductions in patient and system delay in the last decade, women continue to have longer  
7  
8 presentation and treatment times.<sup>38</sup> Sex differences also exist in clinical presentation of  
9  
10 STEMI. Although chest pain was the most common ACS symptom in both sexes, women  
11  
12 were more likely to present without chest pain than men.<sup>39 40</sup> Lower rates of typical chest  
13  
14 pain reported among women with STEMI may also influence provider decision-making to  
15  
16 pursue less aggressive care including invasive revascularization.  
17  
18  
19  
20  
21  
22  
23

24  
25 Some included studies of our meta-analysis enrolled STEMI patients in general<sup>14-16</sup>, while  
26  
27 some others enrolled patients undergoing PCI for STEMI<sup>11 13 18</sup>. The different prognosis of  
28  
29 patients receiving reperfusion therapy or no-reperfusion therapy might be a potential  
30  
31 source of heterogeneity of our study. Nevertheless, our results are completely consistent  
32  
33 with a previous meta-analysis from Pancholy et al., which investigated sex differences in  
34  
35 mortality among patients with STEMI treated with primary PCI.<sup>2</sup> Its results demonstrated  
36  
37 that, when adjusted RRs were used, the increased risk for 1-year mortality in women was  
38  
39 no longer significant and the risk of in-hospital mortality still significantly elevated. It should  
40  
41 be noted that more than 50% of patients were treated with PCI in the most study conducted  
42  
43 among the general STEMI patients and included by our analysis, even more than 90% in  
44  
45 some included studies.<sup>12 24</sup> The increasing rate of primary PCI in recent years might be a  
46  
47 reason for the consistency of our findings and previous studies conducted specifically  
48  
49 among STEMI patients undergoing PCI  
50  
51  
52  
53  
54  
55  
56  
57  
58  
59  
60

1  
2  
3  
4 Complications including bleeding, heart failure and mechanical complications are more  
5  
6 likely to develop in women with acute myocardial infarction and increase the risk of  
7  
8 mortality.<sup>14 41 42</sup> Bleeding secondary to antithrombotic therapies and invasive procedures is  
9  
10 more frequent in women.<sup>43</sup> Three included studies reported incidence of bleeding following  
11  
12 STEMI and they all found that women were at higher risk of bleeding.<sup>10 13 18</sup> One study  
13  
14 included in our analysis examined the relationships among sex, acute heart failure, and  
15  
16 related outcomes after STEMI.<sup>14</sup> Its results demonstrate that women are at higher risk to  
17  
18 develop de novo heart failure after STEMI and women with de novo heart failure have  
19  
20 worse survival compared with man. However, we could not compare the incidence of these  
21  
22 complications due to the lack of sufficient data. Mechanical complications requiring surgical  
23  
24 intervention are also much more common in women after acute myocardial infarction and  
25  
26 associated with high mortality rates.<sup>44</sup>

27  
28  
29  
30  
31  
32  
33  
34  
35  
36  
37  
38 Several limitations of this meta-analysis should be considered. First, the included studies  
39  
40 are all observational studies except one post hoc analysis of randomized controlled trial.  
41  
42 Hence, there may be residual confounding bias inherent in the observational study design  
43  
44 in our meta-analysis. Second, in adjusted analysis, not all included studies adjusted for the  
45  
46 same confounders and not all studies reported adjusted RRs. The confounders which were  
47  
48 adjusted in the included studies might differ greatly across studies. Third, there was  
49  
50 substantial heterogeneity in our meta-analysis, which could partly be attributed to the wide  
51  
52 variability in the sample sizes, locations, and treatment regimens across included studies.  
53  
54  
55  
56  
57  
58 Additionally, although we calculated adjusted RRs for all-cause mortality, it needed to be  
59  
60

1  
2  
3  
4 noted that relevant confounders might have differed across studies. Fourth, the analysis of  
5  
6 long-term mortality, especially the adjusted analysis, included far fewer studies compared  
7  
8 with analysis of short-term mortality. Hence, there might be significant bias in the results  
9  
10 about long-term mortality.  
11  
12  
13  
14  
15  
16

17 In conclusion, our meta-analysis, pooling data from contemporary literature, shows that  
18  
19 women with STENI have a higher risk of short-term mortality but not long-term mortality.  
20  
21 The effect of sex differences on mortality in patients with STEMI remain significant after  
22  
23 adjustment for baseline cardiovascular risk factors and clinical profiles, suggesting that  
24  
25 public awareness of increased risk and further improvements in management in women  
26  
27 with STEMI are necessary.  
28  
29  
30  
31  
32  
33  
34

#### 35 **Other Information:**

36  
37  
38  
39

#### 40 **Contribution statement**

41  
42 Ziwei Xi: Study concepts, Study design, Literature research, Statistical analysis,  
43  
44 Manuscript preparation, Manuscript editing. Tingting Guo and Yong Wang: Data  
45  
46 acquisition, Data analysis/interpretation. Jianan Li, Yang Li, Jianfeng Zheng and Runlin  
47  
48 Gao: Manuscript revision/review. Hong Qiu: Manuscript final version approval.  
49  
50  
51  
52  
53  
54

#### 55 **Conflict of interest**

56  
57 The authors declare that there is no conflict of interest.  
58  
59  
60

## Funding

This research received no specific grant from any funding agency in the public, commercial, or not-for-profit sectors.

## Ethics approval

The institutional central committee at Fuwai Hospital approved that the study protocol and inform consent was not required for a systematic review and meta-analysis.

## Data sharing statement

As this is a systematic review and meta-analysis, the data used in the study have already been published by the authors of the included studies. All data relevant to the study are included in the article or uploaded as supplementary information.

Table 1 Characteristics of included studies.

| First Author      | Year | Region       | Study design | Data source             | Multicenter | Time of enrollment      | Number of STEMI patients | Female          | Endpoint                                                          | Follow-up  |
|-------------------|------|--------------|--------------|-------------------------|-------------|-------------------------|--------------------------|-----------------|-------------------------------------------------------------------|------------|
| <b>Venetsanos</b> | 2017 | 13 countries | Prospective  | Clinical registry       | Yes         | Sep, 2011-<br>Oct, 2013 | 1,862                    | 369<br>(20.0)   | Major adverse cardiovascular events and definite stent thrombosis | 30 d       |
| <b>Ali</b>        | 2018 | Germany      | Prospective  | Administrative database | No          | 2013-2017               | 312                      | 101<br>(32.4)   | All-cause in-hospital mortality                                   | NA         |
| <b>Langabeer</b>  | 2018 | US           | Prospective  | Clinical registry       | Yes         | Jan, 2010-<br>Dec, 2015 | 9,674                    | 2,569<br>(26.6) | In-hospital mortality                                             | NA         |
| <b>Tang</b>       | 2018 | China        | Prospective  | Administrative database | No          | Jan, 2013-<br>Dec, 2013 | 1,238                    | 210 (1.9)       | Major adverse cardiac and cerebrovascular events                  | 730 ± 30 d |

|    |                  |      |           |               |               |     |             |        |           |                          |         |
|----|------------------|------|-----------|---------------|---------------|-----|-------------|--------|-----------|--------------------------|---------|
| 1  | <b>Cenko</b>     | 2019 | 12        | Prospective   | Clinical      | Yes | Jan, 2010-  | 10,443 | 3,112     | 30-day all-cause         | 30 d    |
| 2  |                  |      | Europea   |               | registry      |     | Jul, 2018   |        | (29.8)    | mortality                |         |
| 3  |                  |      | n         |               |               |     |             |        |           |                          |         |
| 4  |                  |      | countries |               |               |     |             |        |           |                          |         |
| 5  |                  |      |           |               |               |     |             |        |           |                          |         |
| 6  |                  |      |           |               |               |     |             |        |           |                          |         |
| 7  |                  |      |           |               |               |     |             |        |           |                          |         |
| 8  |                  |      |           |               |               |     |             |        |           |                          |         |
| 9  |                  |      |           |               |               |     |             |        |           |                          |         |
| 10 |                  |      |           |               |               |     |             |        |           |                          |         |
| 11 | <b>Hao</b>       | 2019 | China     | Prospective   | Clinical      | Yes | Nov, 2014-  | 50,203 | 11,016    | In-hospital mortality    | NA      |
| 12 |                  |      |           |               | registry      |     | Jun, 2018   |        | (21,9)    |                          |         |
| 13 |                  |      |           |               |               |     |             |        |           |                          |         |
| 14 |                  |      |           |               |               |     |             |        |           |                          |         |
| 15 |                  |      |           |               |               |     |             |        |           |                          |         |
| 16 |                  |      |           |               |               |     |             |        |           |                          |         |
| 17 | <b>Hannan</b>    | 2019 | US        | Retrospective | Administrativ | Yes | Jan, 2013-  | 23,809 | 7,791     | In hospital/30-day       | 30 d    |
| 18 |                  |      |           |               | e database    |     | Dec, 2015   |        | (32.7)    | mortality                |         |
| 19 |                  |      |           |               |               |     |             |        |           |                          |         |
| 20 |                  |      |           |               |               |     |             |        |           |                          |         |
| 21 |                  |      |           |               |               |     |             |        |           |                          |         |
| 22 | <b>Maznyczka</b> | 2019 | UK        | Retrospective | Clinical      | No  | July, 2011- | 324    | 87 (26.9) | All-cause death/ first   | 5 years |
| 23 |                  |      |           |               | registry      |     | Nov, 2012   |        |           | heart failure            |         |
| 24 |                  |      |           |               |               |     |             |        |           | hospitalization          |         |
| 25 |                  |      |           |               |               |     |             |        |           |                          |         |
| 26 |                  |      |           |               |               |     |             |        |           |                          |         |
| 27 |                  |      |           |               |               |     |             |        |           |                          |         |
| 28 |                  |      |           |               |               |     |             |        |           |                          |         |
| 29 |                  |      |           |               |               |     |             |        |           |                          |         |
| 30 | <b>Stehli</b>    | 2019 | Australia | Prospective   | Clinical      | Yes | 2013-2016   | 6,431  | 1,317     | In hospital/30-day major | 30 d    |
| 31 |                  |      |           |               | registry      |     |             |        | (20.5)    | adverse events, and      |         |
| 32 |                  |      |           |               |               |     |             |        |           | major bleeding           |         |
| 33 |                  |      |           |               |               |     |             |        |           |                          |         |
| 34 |                  |      |           |               |               |     |             |        |           |                          |         |
| 35 |                  |      |           |               |               |     |             |        |           |                          |         |
| 36 |                  |      |           |               |               |     |             |        |           |                          |         |
| 37 |                  |      |           |               |               |     |             |        |           |                          |         |
| 38 | <b>Burgess</b>   | 2020 | Australia | Prospective   | Administrativ | No  | Dec, 2010-  | 589    | 123 (21)  | Cardiac death and        | 2 years |
| 39 |                  |      |           |               |               |     |             |        |           |                          |         |
| 40 |                  |      |           |               |               |     |             |        |           |                          |         |
| 41 |                  |      |           |               |               |     |             |        |           |                          |         |
| 42 |                  |      |           |               |               |     |             |        |           |                          |         |
| 43 |                  |      |           |               |               |     |             |        |           |                          |         |
| 44 |                  |      |           |               |               |     |             |        |           |                          |         |
| 45 |                  |      |           |               |               |     |             |        |           |                          |         |
| 46 |                  |      |           |               |               |     |             |        |           |                          |         |

|                 |      |                 |               |                             |     |                         |        |                 |                                      |                    |
|-----------------|------|-----------------|---------------|-----------------------------|-----|-------------------------|--------|-----------------|--------------------------------------|--------------------|
|                 |      |                 |               | e database                  |     | Apr, 2014               |        |                 | myocardial infarction                |                    |
| <b>Dharma</b>   | 2020 | Indonesi<br>a   | Retrospective | Administrativ<br>e database | No  | Feb, 2011-<br>Aug, 2019 | 6,557  | 929<br>(14.2)   | All-cause mortality                  | 30 d and 1<br>year |
| <b>Kerkmanx</b> | 2020 | Netherla<br>nds | Retrospective | Administrativ<br>e database | Yes | 2015-2016               | 787    | 229 (29)        | All-cause mortality                  | 1 year             |
| <b>Siabani</b>  | 2020 | Iran            | Prospective   | Clinical<br>registry        | No  | Jun, 2016-<br>May, 2018 | 1,484  | 311(21)         | In-hospital mortality                | NA                 |
| <b>Tai</b>      | 2020 | China           | Retrospective | Administrativ<br>e database | No  | Jan, 2013-<br>Dec, 2017 | 182    | 56 (30.8)       | In hospital/1-year<br>mortality      | 1 year             |
| <b>Tizón</b>    | 2020 | Spain           | Prospective   | Clinical<br>registry        | Yes | 2010-2016               | 14,690 | 3,486<br>(23.7) | 30-day/1-year all-cause<br>mortality | 1 year             |

Table 2 Baseline characteristics of participants in included studies.

| First | Year | Age, mean (SD), | Diabete | Hypertensio | Hyperlipidemi | Smokin | Prior | Prior |
|-------|------|-----------------|---------|-------------|---------------|--------|-------|-------|
|-------|------|-----------------|---------|-------------|---------------|--------|-------|-------|

| Author     | years | s, n (%)    |             | n, n (%)   |              | a, n (%)     |            | g, n (%)     |              | MI, n (%)  |              | PCI, n (%) |              |           |            |
|------------|-------|-------------|-------------|------------|--------------|--------------|------------|--------------|--------------|------------|--------------|------------|--------------|-----------|------------|
|            |       | Female      | Male        | Female     | Male         | Female       | Male       | Female       | Male         | Female     | Male         | Female     | Male         |           |            |
| Venetsanos | 2017  | 69 (13.0)   | 59 (11.0)   | 48 (13.0)  | 205 (13.7)   | 190 (51.5)   | 605 (40.5) | 117 (31.7)   | 536 (35.9)   | NA         | NA           | 24 (6.5)   | 135 (9.0)    | 16 (4.3)  | 124 (8.3)  |
| Ali        | 2018  | NA          | NA          | NA         | NA           | NA           | NA         | NA           | NA           | NA         | NA           | NA         | NA           | NA        | NA         |
| Langabeer  | 2018  | 62.5 (13.6) | 60.2 (12.5) | 759 (29.6) | 1,975 (27.8) | NA           | NA         | 1,265 (49.3) | 3,693 (52.0) | 951 (37.0) | 2,763 (38.9) | 435 (16.9) | 1,304 (18.4) | NA        | NA         |
| Tang       | 2018  | 64.5 (9.3)  | 54.4 (10.7) | 66 (31.4)  | 311 (25.1)   | 141 (67.1)   | 659 (53.3) | 125 (59.5)   | 749 (60.3)   | 33 (15.7)  | 957 (77.3)   | 10 (4.8)   | 83 (6.7)     | 60 (28.6) | 282 (22.8) |
| Cenko      | 2019  | 66.1        | 59.7        | 925        | 1,531        | 2,322 (74.6) | 4,502      | 1,353 (43.3) | 3,100        | 1,010      | 3,714        | 301        | 842          | 306       | 762        |



|                 |      |         |           |         |       |           |       |               |       |        |       |         |       |        |       |
|-----------------|------|---------|-----------|---------|-------|-----------|-------|---------------|-------|--------|-------|---------|-------|--------|-------|
|                 |      | (11.7)  | (11.7)    | (29.7)  | (20.9 |           | (61.4 |               | (42.3 | (32.5) | (50.7 | (9.7)   | (11.5 | (9.8)  | (10.4 |
|                 |      | )       | )         | )       | )     | )         | )     | )             | )     | )      | )     | )       | )     | )      | )     |
| <b>Hao</b>      | 2019 | 69.0    | 61.1      | 10,141  | 24,08 | 15,607    | 38,42 | 17,996 (85.4) | 50,94 | 1,719  | 32,37 | NA      | NA    | NA     | NA    |
|                 |      | (10.6)  | (12.4)    | (48.1)  | 2     | (74.1)    | 6     |               | 4     | (8.2)  | 7     |         |       |        |       |
|                 |      |         |           |         | (39.4 |           | (62.9 |               | (83.3 |        | (53.0 |         |       |        |       |
|                 |      |         |           |         | )     |           | )     |               | )     |        | )     |         |       |        |       |
| <b>Hannan</b>   | 2019 | 70.72   | 62.11     | NA      | NA    | NA        | NA    | NA            | NA    | NA     | NA    | NA      | NA    | 868    | 2206  |
|                 |      | (14.73) | (12.82)   |         |       |           |       |               |       |        |       |         |       | (11.1) | (13.8 |
|                 |      |         |           |         |       |           |       |               |       |        |       |         |       | )      | )     |
| <b>Maznyczk</b> | 2019 | 61.2    | 58.6(11.2 | 8 (9.2) | 26    | 32 (36.8) | 73    | 28 (32.2)     | 66    | 57     | 139   | 5 (5.7) | 20    | 2      | 16    |
| <b>a</b>        |      | (12.2)  | )         |         | (11.0 |           | (30.8 |               | (27.8 | (65.5) | (58.6 |         | (8.4) | (2.3)  | (6.8) |
|                 |      |         |           |         | )     |           | )     |               | )     |        | )     |         |       |        |       |
| <b>Stehli</b>   | 2019 | 66.5    | 60.8      | 245     | 770   | NA        | NA    | NA            | NA    | NA     | NA    | NA      | NA    | 104    | 577   |
|                 |      | (13.2)  | (12.2)    | (18.6)  | (15.1 |           |       |               |       |        |       |         |       | (7.9)  | (11.3 |
|                 |      |         |           |         | )     |           |       |               |       |        |       |         |       | )      | )     |

|    |                 |      |         |         |        |       |            |       |            |       |          |       |         |       |        |       |
|----|-----------------|------|---------|---------|--------|-------|------------|-------|------------|-------|----------|-------|---------|-------|--------|-------|
| 1  | <b>Burgess</b>  | 2020 | 62.7    | 58.2    | 39     | 88    | 84 (68.3)  | 243   | 83 (67.5)  | 253   | 64       | 252   | 9 (7.3) | 41    | NA     | NA    |
| 2  |                 |      | (52.7-  | (50.6-  | (31.7) | (18.9 |            | (52.1 |            | (52.3 | (52.0)   | (54.1 |         | (8.8) |        |       |
| 3  |                 |      | 73.2)   | 65.7)   | )      | )     |            | )     |            | )     | )        | )     |         |       |        |       |
| 4  |                 |      |         |         |        |       |            |       |            |       |          |       |         |       |        |       |
| 5  |                 |      |         |         |        |       |            |       |            |       |          |       |         |       |        |       |
| 6  |                 |      |         |         |        |       |            |       |            |       |          |       |         |       |        |       |
| 7  |                 |      |         |         |        |       |            |       |            |       |          |       |         |       |        |       |
| 8  | <b>Dharma</b>   | 2020 | 60 (10) | 55 (10) | 403    | 1548  | 647 (69.6) | 2,889 | 299 (32.2) | 1,779 | 109      | 4,049 | NA      | NA    | NA     | NA    |
| 9  |                 |      |         |         | (43.4) | (27.5 |            | (51.3 |            | (31.6 | (11.7)   | (71.9 |         |       |        |       |
| 10 |                 |      |         |         | )      | )     |            | )     |            | )     | )        | )     |         |       |        |       |
| 11 |                 |      |         |         |        |       |            |       |            |       |          |       |         |       |        |       |
| 12 |                 |      |         |         |        |       |            |       |            |       |          |       |         |       |        |       |
| 13 |                 |      |         |         |        |       |            |       |            |       |          |       |         |       |        |       |
| 14 |                 |      |         |         |        |       |            |       |            |       |          |       |         |       |        |       |
| 15 |                 |      |         |         |        |       |            |       |            |       |          |       |         |       |        |       |
| 16 | <b>Kerkmanx</b> | 2020 | 68 (14) | 61 (12) | 39     | 66    | 101 (45.7) | 178   | 56 (25.9)  | 110   | 88       | 258   | 30      | 79    | 33     | 77    |
| 17 |                 |      |         |         | (17.6) | (12.5 |            | (33.6 |            | (21.0 | (41.1)   | (49.3 | (13.6)  | (13.7 | (14.4) | (14.2 |
| 18 |                 |      |         |         | )      | )     |            | )     |            | )     | )        | )     |         | )     |        | )     |
| 19 |                 |      |         |         |        |       |            |       |            |       |          |       |         |       |        |       |
| 20 |                 |      |         |         |        |       |            |       |            |       |          |       |         |       |        |       |
| 21 |                 |      |         |         |        |       |            |       |            |       |          |       |         |       |        |       |
| 22 |                 |      |         |         |        |       |            |       |            |       |          |       |         |       |        |       |
| 23 |                 |      |         |         |        |       |            |       |            |       |          |       |         |       |        |       |
| 24 | <b>Siabani</b>  | 2020 | 65.8    | 59.0    | 114    | 187   | 195 (63.7) | 410   | 110 (36.7) | 208   | 41       | 655   | NA      | NA    | NA     | NA    |
| 25 |                 |      | (11.3)  | (12.4)  | (37.7) | (16.2 |            | (35.4 |            | (18.5 | (13.2)   | (55.9 |         |       |        |       |
| 26 |                 |      |         |         | )      | )     |            | )     |            | )     | )        | )     |         |       |        |       |
| 27 |                 |      |         |         |        |       |            |       |            |       |          |       |         |       |        |       |
| 28 |                 |      |         |         |        |       |            |       |            |       |          |       |         |       |        |       |
| 29 |                 |      |         |         |        |       |            |       |            |       |          |       |         |       |        |       |
| 30 |                 |      |         |         |        |       |            |       |            |       |          |       |         |       |        |       |
| 31 |                 |      |         |         |        |       |            |       |            |       |          |       |         |       |        |       |
| 32 | <b>Tai</b>      | 2020 | 78 (76- | 78 (76- | 96     | 116   | 217 (79.5) | 319   | NA         | NA    | 14 (5.4) | 239   | NA      | NA    | 36     | 78    |
| 33 |                 |      | 81)     | 80)     | (35.2) | (26.5 |            | (72.8 |            |       |          | (56.5 |         |       | (13.5) | (18.1 |
| 34 |                 |      |         |         | )      | )     |            | )     |            |       |          | )     |         |       |        | )     |
| 35 |                 |      |         |         |        |       |            |       |            |       |          |       |         |       |        |       |
| 36 |                 |      |         |         |        |       |            |       |            |       |          |       |         |       |        |       |
| 37 |                 |      |         |         |        |       |            |       |            |       |          |       |         |       |        |       |
| 38 |                 |      |         |         |        |       |            |       |            |       |          |       |         |       |        |       |
| 39 |                 |      |         |         |        |       |            |       |            |       |          |       |         |       |        |       |
| 40 |                 |      |         |         |        |       |            |       |            |       |          |       |         |       |        |       |
| 41 |                 |      |         |         |        |       |            |       |            |       |          |       |         |       |        |       |
| 42 |                 |      |         |         |        |       |            |       |            |       |          |       |         |       |        |       |
| 43 |                 |      |         |         |        |       |            |       |            |       |          |       |         |       |        |       |
| 44 |                 |      |         |         |        |       |            |       |            |       |          |       |         |       |        |       |
| 45 |                 |      |         |         |        |       |            |       |            |       |          |       |         |       |        |       |
| 46 |                 |      |         |         |        |       |            |       |            |       |          |       |         |       |        |       |

|    |              |      |        |        |        |       |              |       |            |       |        |       |    |    |    |    |
|----|--------------|------|--------|--------|--------|-------|--------------|-------|------------|-------|--------|-------|----|----|----|----|
| 1  | <b>Tizón</b> | 2020 | 69.9   | 60.9   | 844    | 1,927 | 1,192 (34.2) | 2,722 | 878 (25.2) | 2,375 | 474    | 2,711 | NA | NA | NA | NA |
| 2  |              |      |        |        |        |       |              |       |            |       |        |       |    |    |    |    |
| 3  |              |      | (13.7) | (12.6) | (24.2) | (17.2 |              | (24.3 |            | (21.2 | (13.6) | (24.2 |    |    |    |    |
| 4  |              |      |        |        |        | )     |              | )     |            | )     |        | )     |    |    |    |    |
| 5  |              |      |        |        |        |       |              |       |            |       |        |       |    |    |    |    |
| 6  |              |      |        |        |        |       |              |       |            |       |        |       |    |    |    |    |
| 7  |              |      |        |        |        |       |              |       |            |       |        |       |    |    |    |    |
| 8  |              |      |        |        |        |       |              |       |            |       |        |       |    |    |    |    |
| 9  |              |      |        |        |        |       |              |       |            |       |        |       |    |    |    |    |
| 10 |              |      |        |        |        |       |              |       |            |       |        |       |    |    |    |    |
| 11 |              |      |        |        |        |       |              |       |            |       |        |       |    |    |    |    |
| 12 |              |      |        |        |        |       |              |       |            |       |        |       |    |    |    |    |
| 13 |              |      |        |        |        |       |              |       |            |       |        |       |    |    |    |    |
| 14 |              |      |        |        |        |       |              |       |            |       |        |       |    |    |    |    |
| 15 |              |      |        |        |        |       |              |       |            |       |        |       |    |    |    |    |
| 16 |              |      |        |        |        |       |              |       |            |       |        |       |    |    |    |    |
| 17 |              |      |        |        |        |       |              |       |            |       |        |       |    |    |    |    |
| 18 |              |      |        |        |        |       |              |       |            |       |        |       |    |    |    |    |
| 19 |              |      |        |        |        |       |              |       |            |       |        |       |    |    |    |    |
| 20 |              |      |        |        |        |       |              |       |            |       |        |       |    |    |    |    |
| 21 |              |      |        |        |        |       |              |       |            |       |        |       |    |    |    |    |
| 22 |              |      |        |        |        |       |              |       |            |       |        |       |    |    |    |    |
| 23 |              |      |        |        |        |       |              |       |            |       |        |       |    |    |    |    |
| 24 |              |      |        |        |        |       |              |       |            |       |        |       |    |    |    |    |
| 25 |              |      |        |        |        |       |              |       |            |       |        |       |    |    |    |    |
| 26 |              |      |        |        |        |       |              |       |            |       |        |       |    |    |    |    |
| 27 |              |      |        |        |        |       |              |       |            |       |        |       |    |    |    |    |
| 28 |              |      |        |        |        |       |              |       |            |       |        |       |    |    |    |    |
| 29 |              |      |        |        |        |       |              |       |            |       |        |       |    |    |    |    |
| 30 |              |      |        |        |        |       |              |       |            |       |        |       |    |    |    |    |
| 31 |              |      |        |        |        |       |              |       |            |       |        |       |    |    |    |    |
| 32 |              |      |        |        |        |       |              |       |            |       |        |       |    |    |    |    |
| 33 |              |      |        |        |        |       |              |       |            |       |        |       |    |    |    |    |
| 34 |              |      |        |        |        |       |              |       |            |       |        |       |    |    |    |    |
| 35 |              |      |        |        |        |       |              |       |            |       |        |       |    |    |    |    |
| 36 |              |      |        |        |        |       |              |       |            |       |        |       |    |    |    |    |
| 37 |              |      |        |        |        |       |              |       |            |       |        |       |    |    |    |    |
| 38 |              |      |        |        |        |       |              |       |            |       |        |       |    |    |    |    |
| 39 |              |      |        |        |        |       |              |       |            |       |        |       |    |    |    |    |
| 40 |              |      |        |        |        |       |              |       |            |       |        |       |    |    |    |    |
| 41 |              |      |        |        |        |       |              |       |            |       |        |       |    |    |    |    |
| 42 |              |      |        |        |        |       |              |       |            |       |        |       |    |    |    |    |
| 43 |              |      |        |        |        |       |              |       |            |       |        |       |    |    |    |    |
| 44 |              |      |        |        |        |       |              |       |            |       |        |       |    |    |    |    |
| 45 |              |      |        |        |        |       |              |       |            |       |        |       |    |    |    |    |
| 46 |              |      |        |        |        |       |              |       |            |       |        |       |    |    |    |    |

For peer review only

## Reference:

1. Virani SS, Alonso A, Benjamin EJ, et al. Heart Disease and Stroke Statistics-2020 Update: A Report From the American Heart Association. *Circulation* 2020;141(9):e139-e596. doi: 10.1161/cir.0000000000000757 [published Online First: 2020/01/30]
2. Pancholy SB, Shantha GP, Patel T, et al. Sex differences in short-term and long-term all-cause mortality among patients with ST-segment elevation myocardial infarction treated by primary percutaneous intervention: a meta-analysis. *JAMA internal medicine* 2014;174(11):1822-30. doi: 10.1001/jamainternmed.2014.4762 [published Online First: 2014/09/30]
3. Wenger NK, Arnold A, Bairey Merz CN, et al. Hypertension Across a Woman's Life Cycle. *Journal of the American College of Cardiology* 2018;71(16):1797-813. doi: 10.1016/j.jacc.2018.02.033 [published Online First: 2018/04/21]
4. Peters SAE, Woodward M. Sex Differences in the Burden and Complications of Diabetes. *Current diabetes reports* 2018;18(6):33. doi: 10.1007/s11892-018-1005-5 [published Online First: 2018/04/20]
5. Huded CP, Johnson M, Kravitz K, et al. 4-Step Protocol for Disparities in STEMI Care and Outcomes in Women. *Journal of the American College of Cardiology* 2018;71(19):2122-32. doi: 10.1016/j.jacc.2018.02.039 [published Online First: 2018/03/15]
6. Mehta LS, Beckie TM, DeVon HA, et al. Acute Myocardial Infarction in Women: A Scientific Statement From the American Heart Association. *Circulation* 2016;133(9):916-47. doi: 10.1161/cir.0000000000000351 [published Online First: 2016/01/27]

- 1  
2  
3  
4 7. Reed GW, Rossi JE, Cannon CP. Acute myocardial infarction. *Lancet (London, England)*  
5  
6 2017;389(10065):197-210. doi: 10.1016/s0140-6736(16)30677-8 [published Online  
7  
8 First: 2016/08/10]  
9  
10  
11 8. Moher D, Liberati A, Tetzlaff J, et al. Preferred reporting items for systematic reviews and  
12  
13 meta-analyses: the PRISMA statement. *BMJ (Clinical research ed)* 2009;339:b2535.  
14  
15 doi: 10.1136/bmj.b2535 [published Online First: 2009/07/23]  
16  
17  
18 9. Stang A. Critical evaluation of the Newcastle-Ottawa scale for the assessment of the quality  
19  
20 of nonrandomized studies in meta-analyses. *European journal of epidemiology*  
21  
22 2010;25(9):603-5. doi: 10.1007/s10654-010-9491-z [published Online First:  
23  
24 2010/07/24]  
25  
26  
27  
28 10. Venetsanos D, Sederholm Lawesson S, Alfredsson J, et al. Association between gender  
29  
30 and short-term outcome in patients with ST elevation myocardial infraction participating  
31  
32 in the international, prospective, randomised Administration of Ticagrelor in the  
33  
34 catheterisation Laboratory or in the Ambulance for New ST elevation myocardial  
35  
36 Infarction to open the Coronary artery (ATLANTIC) trial: a prespecified analysis. *BMJ*  
37  
38 *open* 2017;7(9):e015241. doi: 10.1136/bmjopen-2016-015241 [published Online First:  
39  
40 2017/09/25]  
41  
42  
43  
44  
45  
46  
47 11. Ali M, Lange SA, Wittlinger T, et al. In-hospital mortality after acute STEMI in patients  
48  
49 undergoing primary PCI. *Herz* 2018;43(8):741-45. doi: 10.1007/s00059-017-4621-y  
50  
51 [published Online First: 2017/10/11]  
52  
53  
54  
55 12. Langabeer JR, 2nd, Henry TD, Fowler R, et al. Sex-Based Differences in Discharge  
56  
57 Disposition and Outcomes for ST-Segment Elevation Myocardial Infarction Patients  
58  
59  
60

- 1  
2  
3  
4 Within a Regional Network. *Journal of women's health (2002)* 2018;27(8):1001-06. doi:  
5  
6 10.1089/jwh.2017.6553 [published Online First: 2018/01/11]  
7  
8  
9 13. Tang XF, Song Y, Xu JJ, et al. Effect of sex difference in clinical presentation (stable  
10  
11 coronary artery disease vs unstable angina pectoris or non-ST-elevation myocardial  
12  
13 infarction vs ST-elevation myocardial infarction) on 2-year outcomes in patients  
14  
15 undergoing percutaneous coronary intervention. *Journal of interventional cardiology*  
16  
17 2018;31(1):5-14. doi: 10.1111/joic.12451 [published Online First: 2017/10/13]  
18  
19  
20  
21  
22 14. Cenko E, van der Schaar M, Yoon J, et al. Sex-Related Differences in Heart Failure After  
23  
24 ST-Segment Elevation Myocardial Infarction. *Journal of the American College of*  
25  
26 *Cardiology* 2019;74(19):2379-89. doi: 10.1016/j.jacc.2019.08.1047 [published Online  
27  
28 First: 2019/11/09]  
29  
30  
31  
32 15. Hao Y, Liu J, Liu J, et al. Sex Differences in In-Hospital Management and Outcomes of  
33  
34 Patients With Acute Coronary Syndrome. *Circulation* 2019;139(15):1776-85. doi:  
35  
36 10.1161/circulationaha.118.037655 [published Online First: 2019/01/23]  
37  
38  
39  
40 16. Hannan EL, Wu Y, Tamis-Holland J, et al. Sex differences in the treatment and outcomes  
41  
42 of patients hospitalized with ST-elevation myocardial infarction. *Catheterization and*  
43  
44 *cardiovascular interventions : official journal of the Society for Cardiac Angiography &*  
45  
46 *Interventions* 2020;95(2):196-204. doi: 10.1002/ccd.28286 [published Online First:  
47  
48 2019/04/24]  
49  
50  
51  
52 17. Maznyczka AM, Carrick D, Carberry J, et al. Sex-based associations with microvascular  
53  
54 injury and outcomes after ST-segment elevation myocardial infarction. *Open heart*  
55  
56 2019;6(1):e000979. doi: 10.1136/openhrt-2018-000979 [published Online First:  
57  
58  
59  
60

2019/06/07]

18. Stehli J, Martin C, Brennan A, et al. Sex Differences Persist in Time to Presentation, Revascularization, and Mortality in Myocardial Infarction Treated With Percutaneous Coronary Intervention. *Journal of the American Heart Association* 2019;8(10):e012161. doi: 10.1161/jaha.119.012161 [published Online First: 2019/05/17]
19. Burgess SN, Juergens CP, Nguyen TL, et al. Comparison of Late Cardiac Death and Myocardial Infarction Rates in Women Vs Men With ST-Elevation Myocardial Infarction. *The American journal of cardiology* 2020;128:120-26. doi: 10.1016/j.amjcard.2020.04.044 [published Online First: 2020/07/12]
20. Dharma S, Dakota I, Andriantoro H, et al. Association of gender with clinical outcomes of patients with acute ST-segment elevation myocardial infarction presenting with acute heart failure. *Coronary artery disease* 2020 doi: 10.1097/mca.0000000000000892 [published Online First: 2020/04/26]
21. Kerkman T, Ten Brinke LBG, Huybrechts B, et al. Evaluation of sex differences in patients with ST-elevated myocardial infarction: an observational cohort study in Amsterdam and surrounding region. *Netherlands heart journal : monthly journal of the Netherlands Society of Cardiology and the Netherlands Heart Foundation* 2020;28(11):595-603. doi: 10.1007/s12471-020-01435-9 [published Online First: 2020/06/13]
22. Siabani S, Davidson PM, Babakhani M, et al. Gender-based difference in early mortality among patients with ST-segment elevation myocardial infarction: insights from Kermanshah STEMI Registry. *Journal of cardiovascular and thoracic research* 2020;12(1):63-68. doi: 10.34172/jcvtr.2020.10 [published Online First: 2020/03/27]

- 1  
2  
3  
4 23. Tai S, Li X, Yang H, et al. Sex Differences in the Outcomes of Elderly Patients with Acute  
5  
6 Coronary Syndrome. *Cardiology research and practice* 2020;2020:5091490. doi:  
7  
8 10.1155/2020/5091490 [published Online First: 2020/05/27]  
9  
10  
11 24. Tizón-Marcos H, Vaquerizo B, Marrugat J, et al. Differences in 30-day complications and  
12  
13 1-year mortality by sex in patients with a first STEMI managed by the Codi IAM network  
14  
15 between 2010 and 2016. *Revista espanola de cardiologia (English ed)* 2020 doi:  
16  
17 10.1016/j.rec.2020.06.002 [published Online First: 2020/07/15]  
18  
19  
20 25. Bavishi C, Bangalore S, Patel D, et al. Short and long-term mortality in women and men  
21  
22 undergoing primary angioplasty: A comprehensive meta-analysis. *International journal*  
23  
24 *of cardiology* 2015;198:123-30. doi: 10.1016/j.ijcard.2015.07.001 [published Online  
25  
26 First: 2015/07/15]  
27  
28  
29 26. Kosmidou I, Redfors B, Selker HP, et al. Infarct size, left ventricular function, and prognosis  
30  
31 in women compared to men after primary percutaneous coronary intervention in ST-  
32  
33 segment elevation myocardial infarction: results from an individual patient-level pooled  
34  
35 analysis of 10 randomized trials. *European heart journal* 2017;38(21):1656-63. doi:  
36  
37 10.1093/eurheartj/ehx159 [published Online First: 2017/04/14]  
38  
39  
40 27. Millett ERC, Peters SAE, Woodward M. Sex differences in risk factors for myocardial  
41  
42 infarction: cohort study of UK Biobank participants. *BMJ (Clinical research ed)*  
43  
44 2018;363:k4247. doi: 10.1136/bmj.k4247 [published Online First: 2018/11/09]  
45  
46  
47 28. Yusuf S, Hawken S, Ounpuu S, et al. Effect of potentially modifiable risk factors associated  
48  
49 with myocardial infarction in 52 countries (the INTERHEART study): case-control study.  
50  
51 *Lancet (London, England)* 2004;364(9438):937-52. doi: 10.1016/s0140-  
52  
53  
54  
55  
56  
57  
58  
59  
60



6736(04)17018-9 [published Online First: 2004/09/15]

29. Harreiter J, Fadl H, Kautzky-Willer A, et al. Do Women with Diabetes Need More Intensive Action for Cardiovascular Reduction than Men with Diabetes? *Current diabetes reports* 2020;20(11):61. doi: 10.1007/s11892-020-01348-2 [published Online First: 2020/10/10]
30. Arora S, Stouffer GA, Kucharska-Newton AM, et al. Twenty Year Trends and Sex Differences in Young Adults Hospitalized With Acute Myocardial Infarction. *Circulation* 2019;139(8):1047-56. doi: 10.1161/circulationaha.118.037137 [published Online First: 2018/12/28]
31. Zhao M, Woodward M, Vaartjes I, et al. Sex Differences in Cardiovascular Medication Prescription in Primary Care: A Systematic Review and Meta-Analysis. *Journal of the American Heart Association* 2020;9(11):e014742. doi: 10.1161/jaha.119.014742 [published Online First: 2020/05/21]
32. Eindhoven DC, Hilt AD, Zwaan TC, et al. Age and gender differences in medical adherence after myocardial infarction: Women do not receive optimal treatment - The Netherlands claims database. *European journal of preventive cardiology* 2018;25(2):181-89. doi: 10.1177/2047487317744363 [published Online First: 2017/11/23]
33. Smolina K, Ball L, Humphries KH, et al. Sex Disparities in Post-Acute Myocardial Infarction Pharmacologic Treatment Initiation and Adherence: Problem for Young Women. *Circulation Cardiovascular quality and outcomes* 2015;8(6):586-92. doi: 10.1161/circoutcomes.115.001987 [published Online First: 2015/10/16]
34. Nguyen HL, Goldberg RJ, Gore JM, et al. Age and sex differences, and changing trends, in the use of evidence-based therapies in acute coronary syndromes: perspectives

- 1  
2  
3  
4 from a multinational registry. *Coronary artery disease* 2010;21(6):336-44. doi:  
5  
6 10.1097/MCA.0b013e32833ce07c [published Online First: 2010/07/28]  
7  
8  
9 35. Pelletier R, Humphries KH, Shimony A, et al. Sex-related differences in access to care  
10  
11 among patients with premature acute coronary syndrome. *CMAJ : Canadian Medical*  
12  
13 *Association journal = journal de l'Association medicale canadienne* 2014;186(7):497-  
14  
15 504. doi: 10.1503/cmaj.131450 [published Online First: 2014/03/19]  
16  
17  
18  
19 36. Murphy AC, Yudi MB, Farouque O, et al. Impact of Gender and Door-to-Balloon Times on  
20  
21 Long-Term Mortality in Patients Presenting With ST-Elevation Myocardial Infarction.  
22  
23 *The American journal of cardiology* 2019;124(6):833-41. doi:  
24  
25 10.1016/j.amjcard.2019.06.008 [published Online First: 2019/07/23]  
26  
27  
28  
29 37. D'Onofrio G, Safdar B, Lichtman JH, et al. Sex differences in reperfusion in young patients  
30  
31 with ST-segment-elevation myocardial infarction: results from the VIRGO study.  
32  
33 *Circulation* 2015;131(15):1324-32. doi: 10.1161/circulationaha.114.012293 [published  
34  
35 Online First: 2015/03/21]  
36  
37  
38  
39 38. Bugiardini R, Ricci B, Cenko E, et al. Delayed Care and Mortality Among Women and Men  
40  
41 With Myocardial Infarction. *Journal of the American Heart Association* 2017;6(8) doi:  
42  
43 10.1161/jaha.117.005968 [published Online First: 2017/09/02]  
44  
45  
46  
47 39. Khan NA, Daskalopoulou SS, Karp I, et al. Sex differences in acute coronary syndrome  
48  
49 symptom presentation in young patients. *JAMA internal medicine* 2013;173(20):1863-  
50  
51 71. doi: 10.1001/jamainternmed.2013.10149 [published Online First: 2013/09/18]  
52  
53  
54  
55 40. Canto JG, Rogers WJ, Goldberg RJ, et al. Association of age and sex with myocardial  
56  
57 infarction symptom presentation and in-hospital mortality. *Jama* 2012;307(8):813-22.  
58  
59  
60

1  
2  
3  
4 doi: 10.1001/jama.2012.199 [published Online First: 2012/02/24]  
5

6  
7 41. Moscucci M, Fox KA, Cannon CP, et al. Predictors of major bleeding in acute coronary  
8  
9 syndromes: the Global Registry of Acute Coronary Events (GRACE). *European heart*  
10  
11 *journal* 2003;24(20):1815-23. doi: 10.1016/s0195-668x(03)00485-8 [published Online  
12  
13  
14 First: 2003/10/18]  
15

16  
17 42. Kolte D, Khera S, Aronow WS, et al. Trends in incidence, management, and outcomes of  
18  
19 cardiogenic shock complicating ST-elevation myocardial infarction in the United States.  
20  
21 *Journal of the American Heart Association* 2014;3(1):e000590. doi:  
22  
23 10.1161/jaha.113.000590 [published Online First: 2014/01/15]  
24  
25

26  
27 43. Nanna MG, Hajduk AM, Krumholz HM, et al. Sex-Based Differences in Presentation,  
28  
29 Treatment, and Complications Among Older Adults Hospitalized for Acute Myocardial  
30  
31 Infarction: The SILVER-AMI Study. *Circulation Cardiovascular quality and outcomes*  
32  
33 2019;12(10):e005691. doi: 10.1161/circoutcomes.119.005691 [published Online First:  
34  
35 2019/10/15]  
36  
37

38  
39 44. Elbadawi A, Elgendy IY, Mahmoud K, et al. Temporal Trends and Outcomes of Mechanical  
40  
41 Complications in Patients With Acute Myocardial Infarction. *JACC Cardiovascular*  
42  
43 *interventions* 2019;12(18):1825-36. doi: 10.1016/j.jcin.2019.04.039 [published Online  
44  
45  
46 First: 2019/09/21]  
47  
48  
49  
50  
51  
52  
53  
54  
55  
56  
57  
58  
59  
60

1  
2  
3  
4 Figure 1 Flowchart of selection of studies included in meta-analysis.  
5  
6  
7  
8

9 Figure 2 Forest plots of relative risks of short-term all-cause mortality among women and  
10 men with ST-segment elevation myocardial infarction.  
11  
12

13  
14 Forest plots showing unadjusted (A) and adjusted (B) short-term all-cause mortality of  
15 women compared with men with ST-segment elevation myocardial infarction using  
16 random-effects model.  
17  
18  
19  
20  
21  
22  
23  
24

25 Figure 3 Forest plots of relative risks of long-term all-cause mortality among women and  
26 men with ST-segment elevation myocardial infarction.  
27  
28

29  
30 Forest plots showing unadjusted (A) and adjusted (B) long-term all-cause mortality of  
31 women compared with men with ST-segment elevation myocardial infarction using  
32 random-effects model.  
33  
34  
35  
36  
37  
38  
39  
40  
41  
42  
43  
44  
45  
46  
47  
48  
49  
50  
51  
52  
53  
54  
55  
56  
57  
58  
59  
60

Figure 1 Flowchart of selection of studies included in meta-analysis.

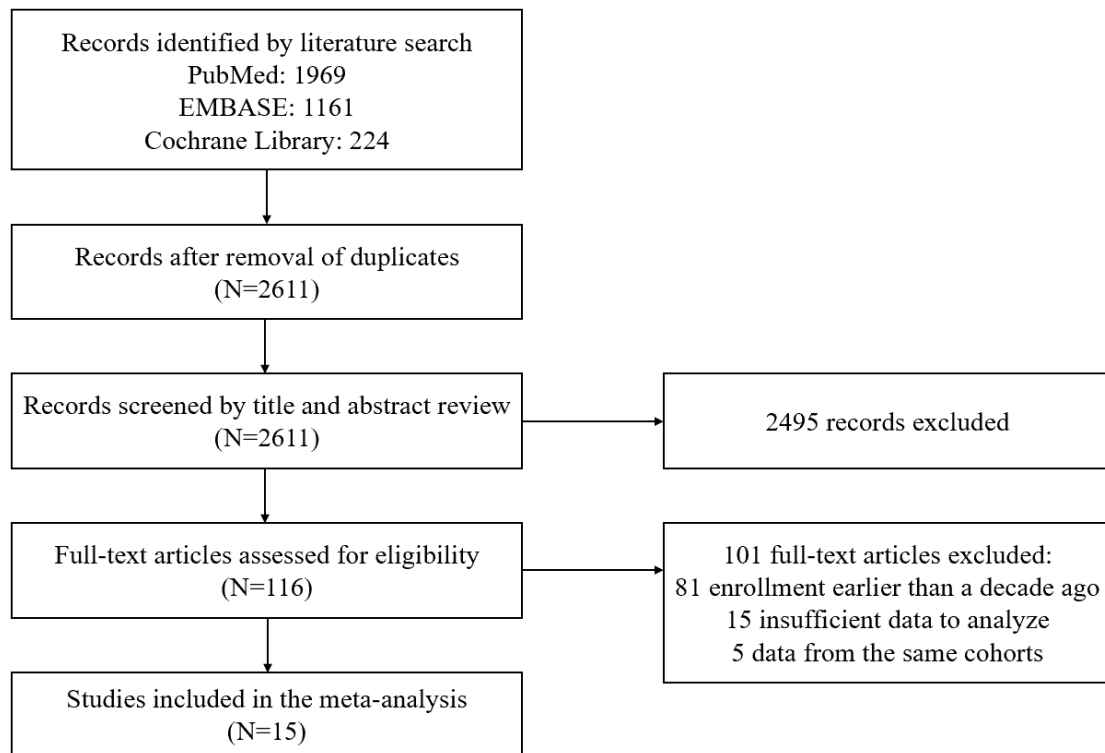

Figure 2 Forest plots of relative risks of short-term all-cause mortality among women and men with ST-segment elevation myocardial infarction.

A



B



Forest plots showing unadjusted (A) and adjusted (B) short-term all-cause mortality of women compared with men with ST-segment elevation myocardial infarction using random-effects model.

Figure 3 Forest plots of relative risks of long-term all-cause mortality among women and men with ST-segment elevation myocardial infarction.

A

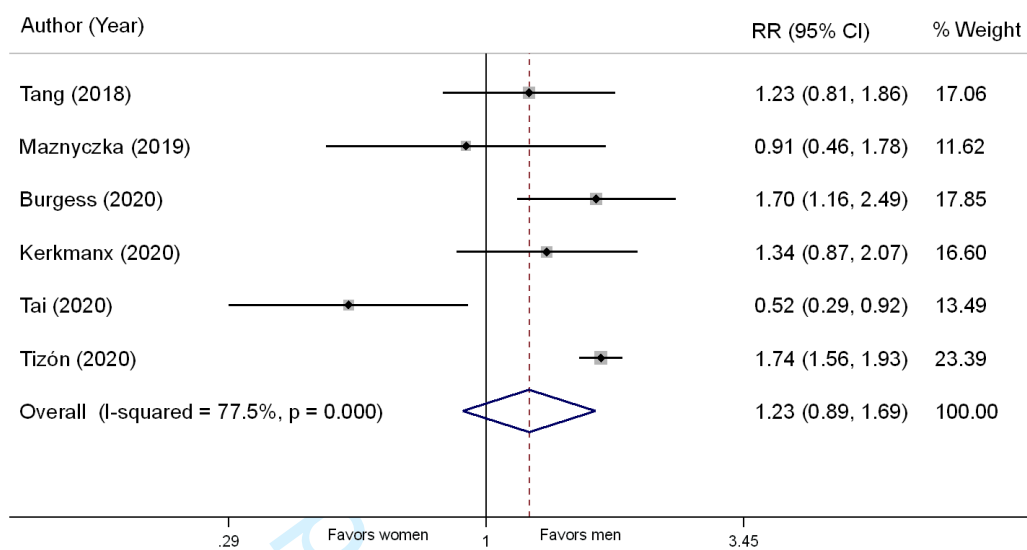

B



Forest plots showing unadjusted (A) and adjusted (B) long-term all-cause mortality of women compared with men with ST-segment elevation myocardial infarction using random-effects model.

Table 1 Variables adjusted in the adjusted analyses from the included studies.

| First Author      | Year | Adjusted Variables                                                                                                                                                                                                                                                                                                                                                                               |
|-------------------|------|--------------------------------------------------------------------------------------------------------------------------------------------------------------------------------------------------------------------------------------------------------------------------------------------------------------------------------------------------------------------------------------------------|
| <b>Venetsanos</b> | 2017 | age, weight, prior MI, prior PCI, patient's history of diabetes, hypertension, non-hemorrhagic stroke, gastrointestinal bleeding, time from symptom onset to pre-PCI ECG, admission Killip class, baseline hemoglobin, eGFR, access site, use of Glycoprotein IIIb/IIa inhibitor, bivalirudin and unfractionated heparin, location of MI and revascularization                                   |
| <b>Langabeer</b>  | 2018 | age, smoking, diabetes, prior CVD, prior stroke, heart failure, shock, length of stay, teaching, insurance, total ischemic time, door to balloon                                                                                                                                                                                                                                                 |
| <b>Tang</b>       | 2018 | age, BMI, LVEF, serum creatinine, use of proton pump inhibitors, use of dual-antiplatelet therapy, previous PCI, diabetes mellitus, hypertension, previous stroke, current smoker, thrombocytopenia, use of femoral approach, use of intra-aortic balloon pump, and multivessel disease                                                                                                          |
| <b>Cenko</b>      | 2019 | age, family history of CAD, diabetes, hypertension, hypercholesterolemia, current smoking, former smoking, prior angina pectoris, prior myocardial infarction, prior PCI, prior CABG, peripheral artery disease, prior stroke, ST-segment elevation in anterior leads (at ECG), systolic blood pressure at baseline, heart rate at baseline, serum creatinine at baseline, Killip Class $\geq 2$ |
| <b>Hao</b>        | 2019 | Age, medical insurance status, acute heart failure, cardiogenic shock, cardiac arrest at admission, heart rate and systolic blood pressure, diabetes mellitus, smoking, history of CHD, heart failure, renal failure, and cerebrovascular disease, prehospital statin use, renal insufficiency, and transfer status.                                                                             |
| <b>Hannan</b>     | 2019 | age, STEMI location, heart rate, mean arterial pressure, history                                                                                                                                                                                                                                                                                                                                 |



|                  |      |                                                                                                                                                                                                                                                                                                                                                                                                                                                                                                                                                                                                                                                                                                                                                                                                                                                                                                                                                                                                              |
|------------------|------|--------------------------------------------------------------------------------------------------------------------------------------------------------------------------------------------------------------------------------------------------------------------------------------------------------------------------------------------------------------------------------------------------------------------------------------------------------------------------------------------------------------------------------------------------------------------------------------------------------------------------------------------------------------------------------------------------------------------------------------------------------------------------------------------------------------------------------------------------------------------------------------------------------------------------------------------------------------------------------------------------------------|
|                  |      | of hospitalization in last year, history of PCI, history of CABG surgery, septicemia/sepsis/systemic inflammatory response /shock, metastatic cancer/acute leukemia, diabetes with acute complications, end stage liver disease, inflammatory bowel disease, coagulation defects and other specified hematological disorders, dementia, polyneuropathy, muscular dystrophy, seizure disorders and convulsions, coma/brain compression/anoxic damage, cardiorespiratory failure and shock, congestive heart failure, specified heart arrhythmias, ischemic or unspecified stroke, hemiplegia/hemiparesis, vascular disease with complications, vascular disease without complications, aspiration and specified bacterial pneumonias, acute renal failure, chronic kidney disease, Stage 5, unspecified renal failure, nephritis, pressure ulcer of skin with partial thickness skin loss*, pressure pre-ulcer skin changes, chronic ulcer of skin except pressure ulcer, lower limb/amputation complications |
| <b>Maznyczka</b> | 2019 | NA                                                                                                                                                                                                                                                                                                                                                                                                                                                                                                                                                                                                                                                                                                                                                                                                                                                                                                                                                                                                           |
| <b>Stehli</b>    | 2019 | age, diabetes mellitus, eGFR, previous PCI and/or coronary artery bypass grafting, history of peripheral vascular disease and CVD, LVEF, out-of-hospital and in-hospital cardiac arrest, cardiogenic shock, and occurrence time of symptom onset                                                                                                                                                                                                                                                                                                                                                                                                                                                                                                                                                                                                                                                                                                                                                             |
| <b>Burgess</b>   | 2020 | NA                                                                                                                                                                                                                                                                                                                                                                                                                                                                                                                                                                                                                                                                                                                                                                                                                                                                                                                                                                                                           |
| <b>Dharma</b>    | 2020 | NA                                                                                                                                                                                                                                                                                                                                                                                                                                                                                                                                                                                                                                                                                                                                                                                                                                                                                                                                                                                                           |
| <b>Kerkmanx</b>  | 2020 | NA                                                                                                                                                                                                                                                                                                                                                                                                                                                                                                                                                                                                                                                                                                                                                                                                                                                                                                                                                                                                           |
| <b>Siabani</b>   | 2020 | BMI $\geq$ 25, hypertension, diabetes, current smoking, hypercholesterolemia, congestive heart failure, Killip class (at first presentation) $\geq$ II, symptom-to-balloon time > 360 min and door-to-balloon time > 90 min                                                                                                                                                                                                                                                                                                                                                                                                                                                                                                                                                                                                                                                                                                                                                                                  |

|              |      |                                                                                                                        |
|--------------|------|------------------------------------------------------------------------------------------------------------------------|
| <b>Tai</b>   | 2020 | NA                                                                                                                     |
| <b>Tizón</b> | 2020 | age, diabetes mellitus, recruitment year, time from symptom onset to culprit coronary artery opening, and Killip class |

MI: myocardial infarction, PCI: percutaneous coronary intervention, ECG: electrocardiograph, eGFR: estimated glomerular filtration rate, CVD: cardiovascular disease, BMI: body mass index, LVEF: left ventricular ejection fraction, CABG: coronary artery bypass graft, CAD: coronary artery disease,

For peer review only

eTable 2 Assessment of study quality using Newcastle-Ottawa scale.

| First Author | Year | Selection                                |                                    |                                       |                                                   | Comparability | Outcome               |                                             |                       | Total point |
|--------------|------|------------------------------------------|------------------------------------|---------------------------------------|---------------------------------------------------|---------------|-----------------------|---------------------------------------------|-----------------------|-------------|
|              |      | Representativeness of the exposed cohort | Selection of the no exposed cohort | Ascertainment of exposure to implants | Outcome of interest not present at start of study |               | Assessment of outcome | Follow-up long enough for outcomes to occur | Adequacy of follow-up |             |
| Venetsanos   | 2017 | *                                        | *                                  | *                                     | *                                                 | **            | *                     | \                                           | *                     | 8           |
| Ali          | 2018 | \                                        | \                                  | *                                     | *                                                 | \             | *                     | \                                           | *                     | 4           |
| Langabeer    | 2018 | *                                        | *                                  | *                                     | *                                                 | *             | *                     | \                                           | *                     | 7           |
| Tang         | 2018 | \                                        | \                                  | *                                     | *                                                 | **            | *                     | *                                           | *                     | 7           |
| Cenko        | 2019 | *                                        | *                                  | *                                     | *                                                 | **            | *                     | \                                           | *                     | 8           |
| Hao          | 2019 | *                                        | *                                  | *                                     | *                                                 | **            | *                     | \                                           | *                     | 8           |
| Hannan       | 2019 | *                                        | *                                  | *                                     | *                                                 | **            | *                     | \                                           | *                     | 8           |
| Maznyczka    | 2019 | \                                        | \                                  | *                                     | *                                                 | \             | *                     | *                                           | *                     | 5           |
| Stehli       | 2019 | *                                        | *                                  | *                                     | *                                                 | **            | *                     | \                                           | *                     | 8           |

|                 |      |   |   |   |   |    |   |   |   |   |
|-----------------|------|---|---|---|---|----|---|---|---|---|
| <b>Burgess</b>  | 2020 | \ | \ | * | * | ** | * | * | * | 7 |
| <b>Dharma</b>   | 2020 | \ | \ | * | * | *  | * | * | * | 6 |
| <b>Kerkmanx</b> | 2020 | * | * | * | * | \  | * | * | * | 7 |
| <b>Siabani</b>  | 2020 | \ | \ | * | * | *  | * | \ | * | 5 |
| <b>Tai</b>      | 2020 | \ | \ | * | * | ** | * | * | * | 7 |
| <b>Tizón</b>    | 2020 | * | * | * | * | ** | * | * | * | 9 |

eFigure 1

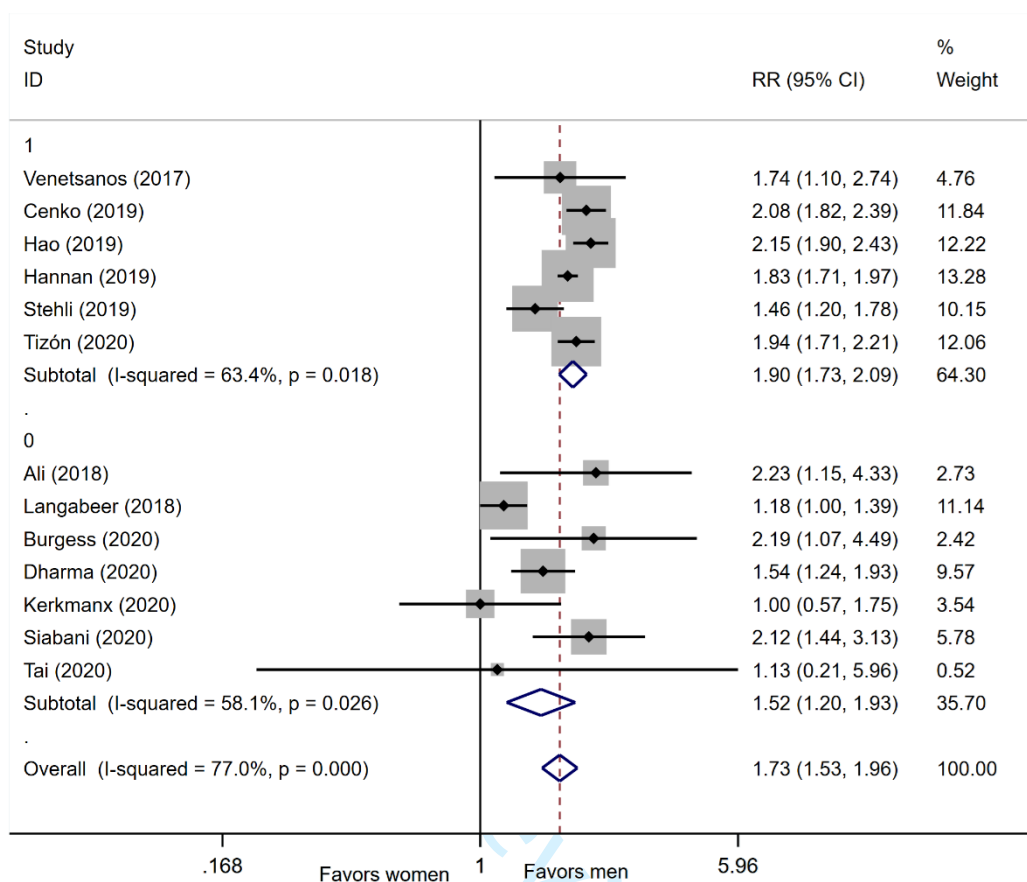

eFigure 2 Meta-influence analysis for unadjusted short-term mortality

1  
2  
3  
4  
5  
6  
7  
8  
9  
10  
11  
12  
13  
14  
15  
16  
17  
18  
19  
20  
21  
22  
23  
24  
25  
26  
27  
28  
29  
30  
31  
32  
33  
34  
35  
36  
37  
38  
39  
40  
41  
42  
43  
44  
45  
46  
47  
48  
49  
50  
51  
52  
53  
54  
55  
56  
57  
58  
59  
60

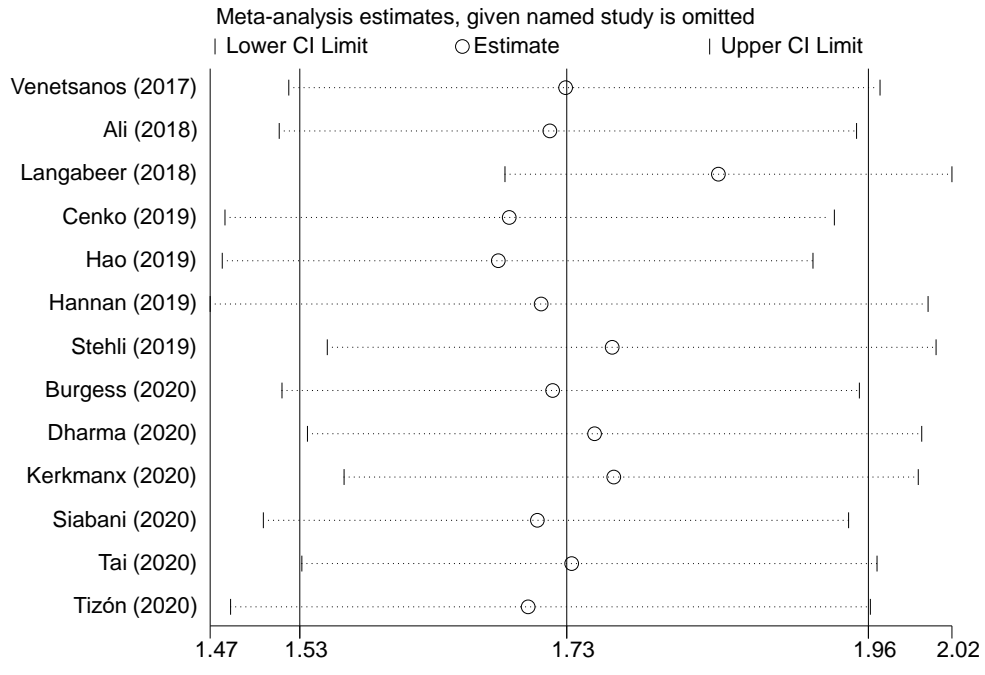

eFigure 3 Meta-influence analysis for unadjusted long-term mortality

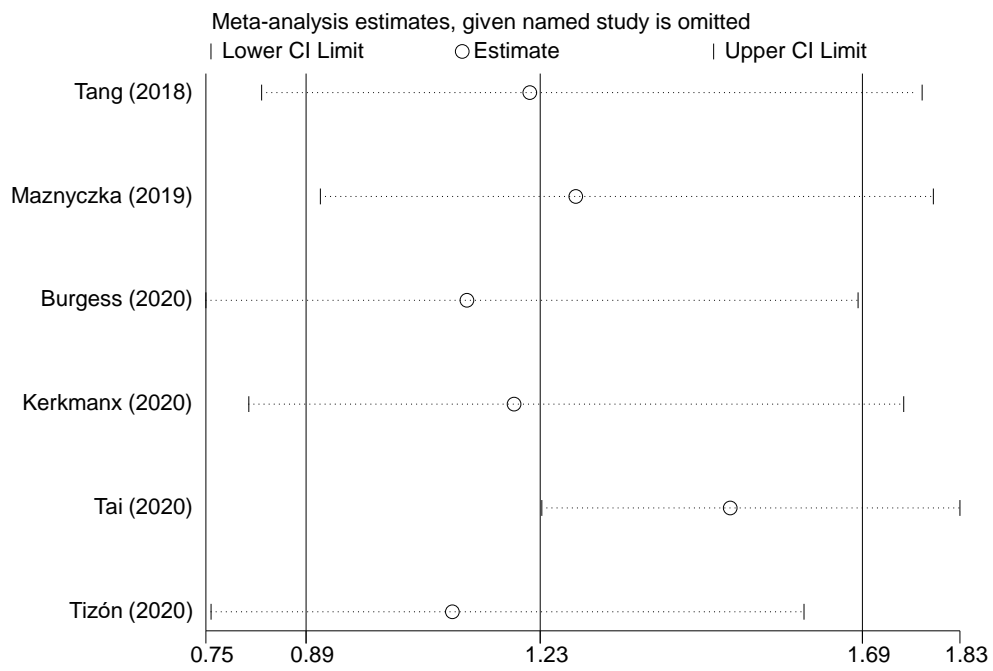

eFigure 4 Funnel plots for publication bias for unadjusted short-term (A) and long-term (B) mortality

A

1  
2  
3  
4  
5  
6  
7  
8  
9  
10  
11  
12  
13  
14  
15  
16  
17  
18  
19  
20  
21  
22  
23  
24  
25  
26  
27  
28  
29  
30  
31  
32  
33  
34  
35  
36  
37  
38  
39  
40  
41  
42  
43  
44  
45  
46  
47  
48  
49  
50  
51  
52  
53  
54  
55  
56  
57  
58  
59  
60

Begg's funnel plot with pseudo 95% confidence limits

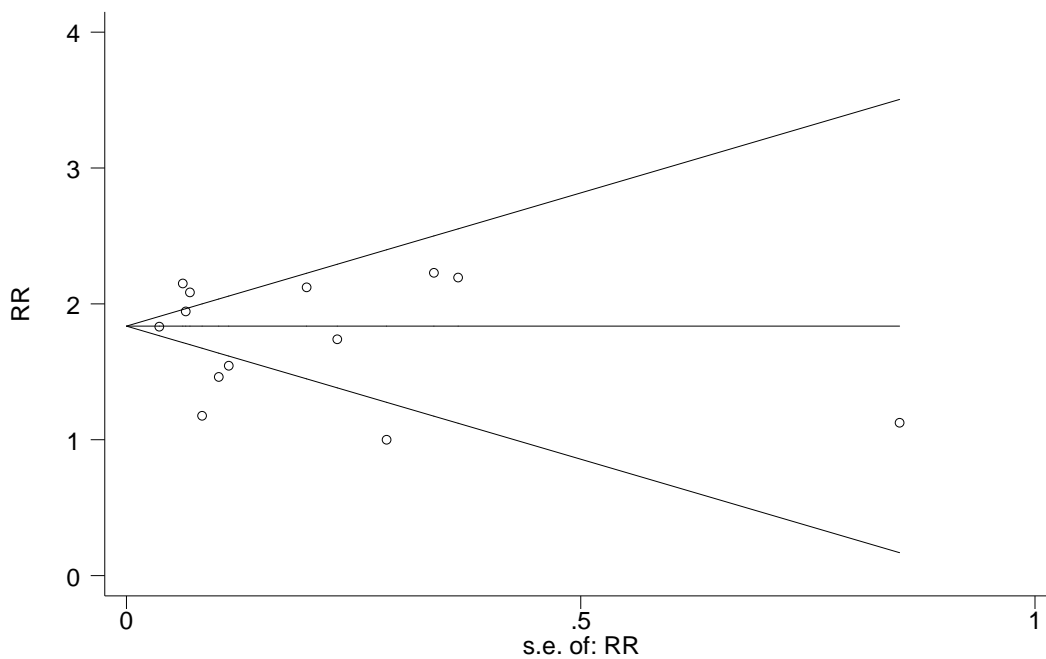

B

Begg's funnel plot with pseudo 95% confidence limits

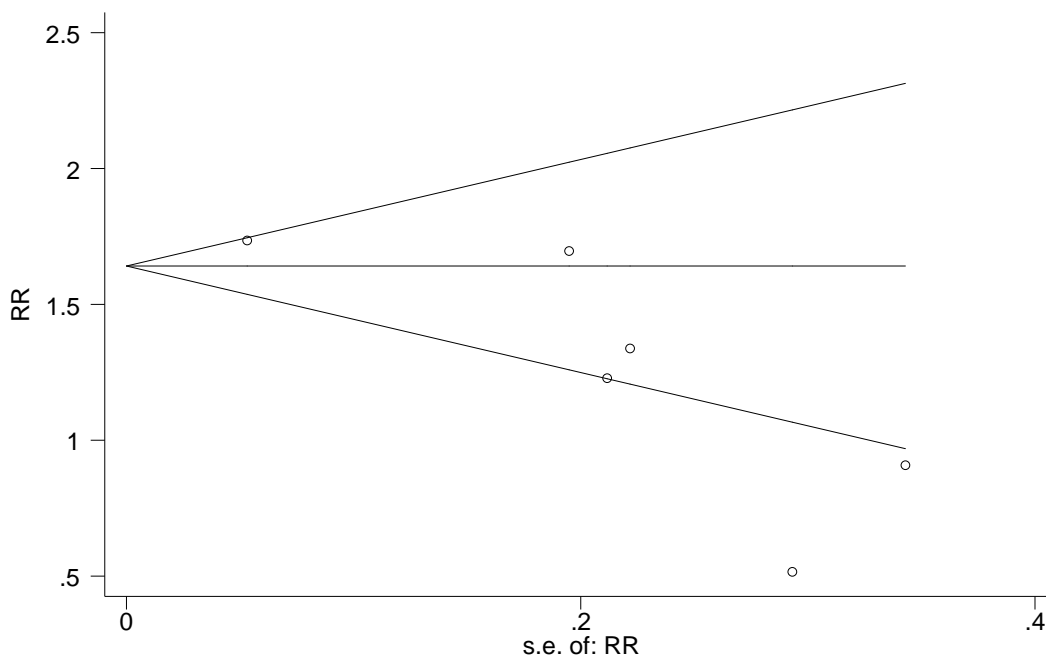

1  
2  
3  
4 **Contemporary sex differences in mortality among patients with ST-segment elevation**  
5  
6 **myocardial infarction: a systematic review and meta-analysis**  
7

8  
9 **Short title : Sex differences in STEMI**  
10

11 **Authors:**

12  
13  
14 Ziwei Xi<sup>1</sup>, Hong Qiu<sup>1</sup>, Tingting Guo<sup>2</sup>, Yong Wang<sup>1</sup>, Jianan Li<sup>3,1</sup>, Yang Li<sup>1</sup>, Jianfeng Zheng<sup>1</sup>,  
15  
16  
17 Runlin Gao<sup>1</sup>

18  
19 *1. Department of Cardiology, Coronary artery disease center, Fuwai Hospital, National*  
20  
21 *Center for Cardiovascular Diseases, Chinese Academy of Medical Sciences and Peking*  
22  
23 *Union Medical College, Beijing, China*  
24

25  
26  
27 *2. Thrombosis Center, National Center for Cardiovascular Diseases, State Key*  
28  
29 *Laboratory of Cardiovascular Disease, Fuwai Hospital, Chinese Academy of Medical*  
30  
31 *Sciences and Peking Union Medical College, Beijing, China*  
32

33  
34  
35 *3. Department of Cardiology and Macrovascular Disease, Beijing Tiantan Hospital,*  
36  
37 *Capital Medical University, Beijing, China*  
38

39  
40  
41  
42  
43 **Corresponding author:**

44  
45 Prof. Hong Qiu, M.D.

46  
47  
48 E-mail address: qiu hong6780@sina.com  
49

50  
51 Department and affiliation: Department of Cardiology, Coronary artery disease center,  
52  
53 Fuwai Hospital, National Center for Cardiovascular Diseases, Chinese Academy of  
54  
55 Medical Sciences and Peking Union Medical College, Beijing, China  
56

57  
58 Telephone: 0016-13261179000  
59  
60



Address: No.167 North Lishi Road, Xicheng District, Beijing, China

For peer review only

1  
2  
3  
4  
5  
6  
7  
8  
9  
10  
11  
12  
13  
14  
15  
16  
17  
18  
19  
20  
21  
22  
23  
24  
25  
26  
27  
28  
29  
30  
31  
32  
33  
34  
35  
36  
37  
38  
39  
40  
41  
42  
43  
44  
45  
46  
47  
48  
49  
50  
51  
52  
53  
54  
55  
56  
57  
58  
59  
60

1  
2  
3  
4 **Contemporary sex differences in mortality among patients with ST-segment elevation**  
5  
6 **myocardial infarction: a systematic review and meta-analysis**  
7  
8  
9  
10

11 **Objectives:** To assess the effect of sex differences on short- and long-term mortality among  
12 patients with ST-segment elevation myocardial infarction (STEMI).  
13  
14  
15

16  
17  
18  
19 **Design:** Systematic review and meta-analysis of contemporary available evidence.  
20  
21  
22

23  
24 **Setting:** PubMed, Embase and Cochrane Library were searched for relevant studies  
25 reporting sex specific outcomes among patients with STEMI published between January  
26 1, 2010 to August 1, 2020. Risk ratio (RR) 95% 95% confidence intervals (CIs) were  
27 measured using DerSimonian and Laird random-effects model. Sensitivity analyses were  
28 performed and publication bias was also checked. All statistical analyses were performed  
29 using STATA version 15.0.  
30  
31  
32  
33  
34  
35  
36  
37  
38  
39  
40  
41  
42

43 **Participants:** Studies providing data about short- or long-term mortality stratified by sex in  
44 patients with STEMI were included. Only study conducted in last ten years were included.  
45  
46  
47  
48  
49

50 **Primary and secondary outcome measures:** The primary outcome was all-cause death at  
51 short-(in-hospital or 30 days) and long-term (at least 12 months) follow-up.  
52  
53  
54  
55  
56  
57

58 **Results**  
59  
60

1  
2  
3  
4 A total of fifteen studies involving 128,585 patients (31,706 [24.7%] female and 96,879  
5  
6 [75.3%] male) were included. In the unadjusted analyses, female were at a higher risk of  
7  
8 short-term mortality (RR, 1.73; 95%CI, 1.53-1.96, P<0.001, I<sup>2</sup>=77%) but not long-term  
9  
10 mortality (RR, 1.23; 95%CI, 0.89-1.69, P=0.206, I<sup>2</sup>=77.5%). When adjusted effect  
11  
12 estimates from individual studies were used in meta-analysis, the association between  
13  
14 female and higher risk of short-term mortality remained significant (RR, 1.24; 95%CI, 1.11-  
15  
16 1.38, P<0.001, I<sup>2</sup>=39.6%). And adjusted long-term mortality was also similar between  
17  
18 female and male (RR, 1.11; 95%CI, 0.42-1.80, P=0.670, I<sup>2</sup>=74.5%).  
19  
20  
21  
22  
23  
24  
25  
26  
27  
28

### 29 Conclusions

30 An increased short- but not long-term mortality was found in female with STEMI. After  
31  
32 adjustment for baseline cardiovascular risk factors and clinical profiles, short-term mortality  
33  
34 remains higher in female with STEMI compared to male, indicating the need for further  
35  
36 improvements in management in female patients.  
37  
38  
39  
40  
41  
42  
43  
44  
45  
46  
47  
48  
49  
50  
51  
52  
53  
54  
55  
56  
57  
58  
59  
60

#### Strengths and limitations of this study

- ♦ We assessed the contemporary effect of sex differences on mortality among patients with STEMI by meta-analysis of studies from the last decade.
- ♦ A greater number of potentially eligible articles were screened and the large sample size ensures adequate statistical power to detect even a small effect of interest.
- ♦ Sensitivity analyses by excluding one study at a time and restricting to studies with high quality or with large sample size got consistent results.
- ♦ Substantial and nonnegligible heterogeneity still exist in our meta-analysis and might result in potential bias.
- ♦ Residual confounding bias could not be totally excluded due to the observational study design of most included studies.

# Contemporary sex differences in short- and long-term mortality among patients with ST-segment elevation myocardial infarction: a systematic review and meta-analysis

## Introduction

Acute myocardial infarction remains one of leading causes of mortality in both men and women worldwide despite improvement of acute cardiac care.<sup>1</sup> Numerous studies have reported that women have a higher risk of in-hospital and long-term adverse outcomes following ST-segment elevation myocardial infarction (STEMI) compared with men.<sup>2</sup> Confounders including advanced age and more frequent comorbidities, such as hypertension and diabetes mellitus<sup>3 4</sup>, might contribute to excess mortality in women. Moreover, previous studies show lower rates of guideline directed medical therapy and revascularization are also associated with poorer prognosis for women with STEMI.<sup>5</sup>

Sex discrepancies in management and outcomes after STEMI have been increasingly reported in the literature and raised public awareness.<sup>6</sup> Major progress in therapy for myocardial infarction and primary and secondary preventive interventions has been made to reduce cardiovascular mortality for women.<sup>1 7</sup> And there have been marked reductions in cardiovascular disease mortality in women with acute myocardial infarction in the past two decades.<sup>1</sup> Conflicting results are noted in recent studies on sex differences following STEMI. It is unclear whether the sex differences still exist, in view of substantial improvements in prognosis of cardiovascular disease over the past decade.

In order to assess the contemporary effect of sex differences on short- and long-term

1  
2  
3  
4 mortality among patients with STEMI, we performed a systematic review and meta-  
5  
6 analysis of all available evidence from last decade reporting sex-specific outcomes after  
7  
8 STEMI.  
9  
10

## 11 12 13 14 **Methods**

15  
16  
17  
18  
19 The present systematic review and meta-analysis was performed following the principle  
20  
21 of the Preferred Reporting Items for Systematic Reviews and Meta-Analyses (PRISMA)  
22  
23 statement.<sup>8</sup>  
24  
25  
26  
27  
28  
29

### 30 *Literature search*

31  
32 We conducted a comprehensive search of the PubMed, EMBASE, and Cochrane Library  
33  
34 from January 1, 2010 to August 1, 2020 to identify studies from the last decade that  
35  
36 described sex differences in in short- or long-term mortality among patients with STEMI.  
37  
38 **Both observational studies and randomized clinical trials were eligible.** We queried MeSH  
39  
40 and the abstract text for the following three search terms: gender part (including "gender",  
41  
42 "female", "male", "gender differences", "sex differences" or "sex characteristics"); outcome  
43  
44 part (including "death", "mortality", "hospital mortality", "cardiac death", "sudden cardiac  
45  
46 death", "all-cause mortality", "long term mortality", "one year mortality", "cardiovascular  
47  
48 mortality" or "short term mortality"); myocardial infarction part (including "myocardial  
49  
50 infarction", "acute myocardial infarction", "myocardial necrosis", "ST segment elevation  
51  
52 myocardial infarction", "primary PCI", "primary percutaneous coronary intervention" or  
53  
54  
55  
56  
57  
58  
59  
60

1  
2  
3  
4 "primary angioplasty") to identify relevant studies. There was no language restriction or  
5  
6 age limit.  
7  
8  
9

### 10 11 *Study selection*

12  
13  
14 According to the aim of our analyses, studies were included in this systematic review if  
15  
16 data about short- (in-hospital or 30 days) or long-term (at least 12 months) mortality  
17  
18 stratified by sex in patients with STEMI were reported. Two reviewers identified studies  
19  
20 eligible for further review by performing an initial screen of titles or abstracts of the search  
21  
22 results. Subsequently, a second screen of full texts eligibility was performed by another  
23  
24 two reviewers. Studies had to fulfil the following criteria to be included in the present  
25  
26 analyses: i) studies reporting data on all-cause mortality specific to STEMI population; and  
27  
28 ii) studies providing enough details to obtain numbers of events or incidence rates  
29  
30 according to sex; and iii) enrollment starting earlier than a decade ago. Editorials, letters,  
31  
32 conference proceedings and abstracts were considered to be eligible only if sufficient  
33  
34 information was available in abstracts or associated tables or figures. We excluded studies  
35  
36 if they were review articles or case reports, or if they involved pregnant participants,  
37  
38 critically ill patients, or provided insufficient data to allow for risk estimates to be calculated.  
39  
40  
41  
42  
43  
44  
45  
46  
47

48 Any disagreement was reviewed by a third reviewer and resolved by consensus.  
49  
50  
51

### 52 53 *Data extraction*

54  
55 Detailed data from selected studies were extracted independently by two reviewers using  
56  
57 a standardized form independently. Data about study and participants characteristics,  
58  
59  
60

1  
2  
3  
4 including year of study, sample size, time of enrollment, geographical location, endpoints  
5  
6 of study, and follow-up duration, were collected. Any discrepancies were reviewed by a  
7  
8 third reviewer and resolved by consensus. The quality of included studies was evaluated  
9  
10 by Newcastle-Ottawa scale using prespecified items comprised of patients' selection  
11  
12 (representativeness and selection of patients, ascertainment of exposure), comparability  
13  
14 of cohorts based on design or analysis, and outcome (assessment of outcomes, adequacy  
15  
16 of follow-up).<sup>9</sup> A quality score (0–9 **points**) was generated according to a maximum of 1  
17  
18 **point** for each item.  
19  
20  
21  
22  
23  
24  
25  
26  
27  
28

#### *Patient and public involvement*

29  
30 Due to the nature of the systematic review and meta-analysis, this study did not involve  
31  
32 patients and the public in the design, or conduct, or reporting or dissemination plans.  
33  
34  
35  
36

#### *Statistical analysis*

37  
38 The risk ratios (RRs) and 95% confidence interval (CI) were primarily used to represent  
39  
40 the effect of sex differences on mortality after STEMI. And data were combined using  
41  
42 random-effects model of DerSimonian and Laird with inverse variance weighting. Random-  
43  
44 effect model was used due to substantial clinical and statistical heterogeneity. Following  
45  
46 analyses were performed: i) unadjusted RRs for short- and long-term all-cause mortality  
47  
48 using raw number of death and total participants at risk for death specific to each sex, ii)  
49  
50 adjusted RRs for short- and long-term all-cause mortality using adjusted RRs **if they were**  
51  
52 described in **those** included studies.  
53  
54  
55  
56  
57  
58  
59  
60



1  
2  
3  
4 We assess heterogeneity across studies with Cochran's Q test and I2 test, with  $P < 0.1$  or  
5  
6 I2  $> 50\%$  considered significant. We also performed meta-regression to identify the  
7  
8 potential sources of heterogeneity in the included studies. Furthermore, stratified analysis  
9  
10 was conducted as well by dividing the included studies into different subgroups based on  
11  
12 the Newcastle-Ottawa scale scores ( $> 7$  points or  $\leq 7$  points) to assess the potential sources  
13  
14 of heterogeneity. To assess the potential effect of publication bias, we inspected funnel  
15  
16 plots for asymmetry and used the Egger's regression asymmetry test in which  $P < 0.05$  was  
17  
18 considered to indicate significant publication bias.  
19  
20  
21  
22  
23

24 Sensitivity analyses was conducted by excluding one study at a time and comparing the  
25  
26 results with the complete one. In addition, we also performed sensitivity analyses by  
27  
28 restricting to high-quality studies with a Newcastle-Ottawa scale of 5 points or more and  
29  
30 restricting to studies with sample size bigger than 1000 participants. All statistical analyses  
31  
32 were performed using STATA version 15.0 (Stata Corp, College Station, TX). Differences  
33  
34 were considered statistically significant at  $P < .05$  (2-sided).  
35  
36  
37  
38  
39  
40  
41  
42

## 43 Results

### 44 45 46 47 48 *Literature search*

49  
50 Study selection details were outlined in Figure 1. The literature search identified 2,611  
51  
52 potentially relevant articles. After screening based on title and abstract review, 2495  
53  
54 records were excluded. A total of 116 full-text were finally assessed for eligibility, with 96  
55  
56 papers excluded due to enrollment starting earlier than a decade ago or no sufficient  
57  
58  
59  
60

1  
2  
3  
4 **gender specific data to analyze.** Another 5 papers reviewed in detail were excluded after  
5  
6 due to data from the same cohorts. A total of 15 studies were finally included in the present  
7  
8  
9 systematic review and meta-analysis.<sup>10-24</sup>  
10  
11  
12

### 13 14 *Study characteristics*

15  
16  
17 Of the 15 included studies, 8 were multicenter studies and 4 studies enrolled more than  
18  
19 10,000 patients with STEMI. See Table 1 for further information of included studies.  
20  
21

22 **Baseline characteristics of participants were missing in some included studies, but all**  
23  
24 **included studies provided sufficient data for analysis of sex differences in clinical outcomes.**  
25  
26

27 Except for 1 study, which was a prespecified gender analysis of randomized controlled  
28  
29 trial, the remaining 14 were observational studies. Among the 10 included studies which  
30  
31 reported adjusted analyses, most studied adjusted for age, diabetes mellitus, hypertension,  
32  
33 and prior myocardial infarction/PCI, while some adjusted for renal insufficiency,  
34  
35 and prior myocardial infarction/PCI, while some adjusted for renal insufficiency,  
36  
37 cardiogenic shock, cardiac arrest at admission and occurrence time of symptom onset.  
38  
39

40 **Variables that were adjusted in the adjusted analyses from the included studies were**  
41  
42 **presented in eTable 1 of the Supplementary Material.** Results of assessment of study  
43  
44 quality using Newcastle-Ottawa scale were shown in eTable 2 in the Supplementary  
45  
46  
47  
48 Material.  
49  
50

### 51 52 53 *Patient characteristics*

54  
55  
56 A total of 128,585 patients with STEMI (31,706 [24.7%] female and 96,879 [75.3%] male)  
57  
58 were involved in the 15 included studies. **Female** tended to be older and had higher  
59  
60

1  
2  
3  
4 prevalence of diabetes mellitus in all included studies. And in most studies, other important  
5  
6 comorbidities, including hypertension and hyperlipidemia, were more frequent in female.  
7  
8 Greater proportions of **male** were smokers and had prior PCI or myocardial infarction.  
9  
10  
11 **Besides**, some studies reported that door-to-balloon time and symptom onset to balloon  
12  
13 time were longer in female than **male**. Part of patient baseline characteristics were  
14  
15 summarized in Table 2.  
16  
17

#### 22 *Short-term all-cause mortality*

23  
24 Thirteen studies reported sex-specific unadjusted short-term mortality of patients with  
25  
26 STEMI. There were 2,873 of 31,409 (9.1%) cases of all-cause mortality in female  
27  
28 compared with 4,380 of 95,610 (4.6%) in **male**. **Female** were at a significantly higher risk  
29  
30 of short-term mortality (RR, 1.73; 95%CI, 1.53-1.96,  $P<0.001$ ,  $I^2=77\%$ ) compared with male  
31  
32 (Figure 2 A). Nine studies involving 119,379 patients reported adjusted short-term mortality  
33  
34 specific to sex. In adjusted analysis, the association between female and higher risk of  
35  
36 short-term mortality remained significant (RR, 1.24; 95%CI, 1.11-1.38,  $P<0.001$ ,  $I^2=39.6\%$ )  
37  
38 (Figure 2 B). However, the strength of association calculated with adjusted RRs from these  
39  
40 9 studies was attenuated. **Subgroup analysis demonstrated that the results of studies with**  
41  
42 **Newcastle-Ottawa scale >7 points (RR, 1.90; 95%CI, 1.73-2.09,  $P=0.018$ ,  $I^2=63.4\%$ ) and**  
43  
44 **studies with  $\leq 7$  points (RR, 1.52; 95%CI, 1.20-1.93,  $P=0.026$ ,  $I^2=58.1\%$ ) were consistent**  
45  
46 **in unadjusted short-term mortality (See eFigure 1 in the Supplementary Material).**  
47  
48  
49  
50  
51  
52  
53  
54  
55  
56  
57  
58

#### 59 *Long-term all-cause mortality*

1  
2  
3  
4 Six studies involved 18,018 patients with STEMI (4,191 female and 13,827 male) and  
5  
6 followed up for more than 1 year, and reported all-cause mortality for female and male.  
7  
8  
9 The incidence of long-term all-cause mortality was 13.9% (n=584) in female and 8.7%  
10  
11 (n=1202) in male. In unadjusted analysis, no significant sex difference was found in long-  
12  
13 term mortality (RR, 1.23; 95%CI, 0.89-1.69, P=0.206, I<sup>2</sup>=77.5%) (Figure 3 A). And the  
14  
15 adjusted analysis of the pooled results from four studies, also showed a similar risk of  
16  
17 mortality at long-term follow-up in female compared with male (RR, 1.11; 95%CI, 0.42-1.80,  
18  
19 P=0.670, I<sup>2</sup>=74.5%) (Figure 3 B).  
20  
21  
22  
23  
24  
25  
26  
27

#### 28 *Meta-Regression Analysis, sensitivity analyses and publication bias*

29  
30 According to meta-regression analysis, differences in prevalence of diabetes ( $\beta$  coefficient,  
31  
32 0.248; P=0.337), hypertension ( $\beta$  coefficient, -0.255; P=0.538), hyperlipidemia ( $\beta$   
33  
34 coefficient, 0.260; P=0.415), smoking ( $\beta$  coefficient, -0.040; P=0.255), prior MI ( $\beta$   
35  
36 coefficient, -2.725; P=0.126), and prior PCI ( $\beta$  coefficient, 0.109; P=0.896) between sexes  
37  
38 were not identified as significant sources of heterogeneity for short-term all-cause mortality.  
39  
40 Given that not all included study provided information on confounders stratified by sex, the  
41  
42 results of meta-regression analyses should be interpreted with caution.  
43  
44  
45  
46  
47

48 Sensitivity analysis by excluding one study at a time (See eFigure 2 in the Supplementary  
49  
50 Material) or restricted to data from studies with sample size bigger than 1000 (RR, 1.75;  
51  
52 95%CI, 1.54-1.99, P<.001, I<sup>2</sup>=82.9%) both indicated that none of the studies affected the  
53  
54 results of short-term mortality in this meta-analysis significantly. In analysis for long-term  
55  
56 mortality, sensitivity analysis showed a possibly higher influence on the result attribute to  
57  
58  
59  
60

1  
2  
3  
4 the study of Tai et al (See eFigure 3 in the Supplementary Material). After removing this  
5  
6 study from meta-analysis, the association of female with increased long-term mortality  
7  
8 became significant (RR, 1.50; 95%CI, 1.23-1.83, P=0.148, I<sup>2</sup>=40.9%). We found no  
9  
10 evidence of publication bias across studies based on visual inspection of funnel plots (See  
11  
12 eFigure 4 in the Supplementary Material) and the results from Egger's tests for short-term  
13  
14 mortality (P=0.462) and for long-term mortality (P=0.053).  
15  
16  
17  
18  
19  
20  
21

## 22 Discussion:

23  
24  
25  
26  
27 Our systematic review and meta-analysis of contemporary literature on sex differences  
28  
29 among patients with STEMI demonstrate that female have a higher risk of short- but not  
30  
31 long-term mortality compared with male with STEMI. Furthermore, after adjustment for  
32  
33 baseline cardiovascular risk factors and clinical profiles, the sex differences in short-term  
34  
35 mortality are attenuated but remain significant, while female have the similar long-term  
36  
37 mortality with male.  
38  
39  
40  
41  
42  
43  
44

45 Our results are somewhat in accordance with several previously published meta-analysis.<sup>2</sup>

46  
47  
48 <sup>25</sup> A considerable number of studies have consistently suggested that women were at a  
49  
50 higher risk of short-term mortality after ACS. However, whether risk of long-term mortality  
51  
52 is also higher in women with ACS remains under debate. Some studies indicated that  
53  
54 women with STEMI had a higher 1-year rate of death compared to men<sup>26</sup>, while the 1-year  
55  
56 mortality rate was conversely lower in women than men in some other studies<sup>23 24</sup>. In our  
57  
58  
59  
60

1  
2  
3  
4 study, with respect to short-term mortality, the analyses of studies with high or low quality,  
5  
6 and big or small sample size yielded similar results. However, in terms of long-term  
7  
8 mortality, caution is needed when interpreting our finding of non-significant increased long-  
9  
10 term mortality in adjusted analyses, due to the results of sensitivity analysis which showed  
11  
12 a significant association between female and increased long-term mortality after removing  
13  
14 one study from adjusted analyses.  
15  
16  
17  
18  
19  
20  
21

22 It is widely accepted that there are significant differences in outcomes of women and men  
23  
24 with acute myocardial infarction. In our study, after adjusted for participants' baseline  
25  
26 cardiovascular risk factors and clinical profiles, the strength of association between gender  
27  
28 and short-term mortality was substantially attenuated, which suggested that poorer  
29  
30 baseline cardiovascular risk profile partially explained the impact of sex differences on  
31  
32 mortality. Multiple studies have shown that women with STEMI present at older age and  
33  
34 have a higher burden of comorbidities, contributing to the sex differences in mortality after  
35  
36 STEMI.<sup>27</sup> All studies included in our meta-analysis demonstrate that female patients are  
37  
38 older and with more diabetes mellitus as well as hypertension. In addition, some sex-  
39  
40 specific studies found that certain risk factors and comorbidities were more potent in  
41  
42 women.<sup>28</sup> Diabetes mellitus , hypertension and smoking status are more strongly  
43  
44 associated with increased risk of cardiac events in women compared with men.<sup>27 29</sup>  
45  
46  
47  
48  
49  
50  
51  
52  
53  
54  
55

56 Notably, that these differences mentioned above still could not completely explain the gap  
57  
58 in mortality between sexes. It has been proved that women with acute myocardial infarction  
59  
60

1  
2  
3  
4 were less likely to be treated with guideline directed medical therapy and less likely to  
5  
6 receive primary reperfusion therapy including primary percutaneous coronary intervention  
7  
8 or fibrinolysis.<sup>30</sup> Regarding medical therapy, numerous studies conducted around the world  
9  
10 consistently demonstrate female survivors are receiving less optimal medical therapy after  
11  
12 acute myocardial infarction during hospitalization or at discharge.<sup>31 32</sup> Though there might  
13  
14 be no differences in treatment adherence between men and women, some studies report  
15  
16 significant sex disparities in initiation of appropriate pharmacotherapy after myocardial  
17  
18 infarction.<sup>33</sup> Results from these observational studies have shown women are receiving  
19  
20 less optimal medical therapy including aspirin, statins, and angiotensin-converting enzyme  
21  
22 inhibitors in all age groups, especially young women, and suggested that clinicians and  
23  
24 patients may benefit from better education and awareness of undertreatment of younger  
25  
26 women.<sup>33 34</sup>

27  
28  
29  
30  
31  
32  
33  
34  
35  
36  
37 Lower rates of revascularization are observed among women with STEMI compared with  
38  
39 men in several studies despite proven benefit of this therapy.<sup>35</sup> Moreover, the sex  
40  
41 differences might be driven by delays in presentation to hospital and women with STEMI  
42  
43 were more likely to experience longer delays than men. Although a great improvement in  
44  
45 emergency medical services and timely revascularization over the past decades, recent  
46  
47 studies show that women with STEMI still present later and have a longer ischemic time  
48  
49 than men. Previous studies have shown consistently that women have longer door-to  
50  
51 balloon times and longer door-to needle times.<sup>36 37</sup> In addition, women are also more likely  
52  
53 to exhibit longer pre-hospital delays in seeking medical care after the development of  
54  
55  
56  
57  
58  
59  
60

1  
2  
3  
4 symptoms suggestive of myocardial infarction. Although there have been significant  
5  
6 reductions in patient and system delay in the last decade, women continue to have longer  
7  
8 presentation and treatment times.<sup>38</sup> Sex differences also exist in clinical presentation of  
9  
10 STEMI. Although chest pain was the most common ACS symptom in both sexes, women  
11  
12 were more likely to present without chest pain than men.<sup>39 40</sup> Lower rates of typical chest  
13  
14 pain reported among women with STEMI may also influence provider decision-making to  
15  
16 pursue less aggressive care including invasive revascularization.  
17  
18  
19  
20  
21  
22  
23  
24

25 Some included studies of our meta-analysis enrolled STEMI patients in general<sup>14-16</sup>, while  
26  
27 some others enrolled patients undergoing PCI for STEMI<sup>11 13 18</sup>. The different prognosis of  
28  
29 patients receiving reperfusion therapy or no-reperfusion therapy might be a potential  
30  
31 source of heterogeneity of our study. Nevertheless, our results are completely consistent  
32  
33 with a previous meta-analysis from Pancholy et al., which investigated sex differences in  
34  
35 mortality among patients with STEMI treated with primary PCI.<sup>2</sup> Its results demonstrated  
36  
37 that, when adjusted RRs were used, the increased risk for 1-year mortality in women was  
38  
39 no longer significant and the risk of in-hospital mortality still significantly elevated. It should  
40  
41 be noted that more than 50% of patients were treated with PCI in the most study conducted  
42  
43 among the general STEMI patients and included by our analysis, even more than 90% in  
44  
45 some included studies.<sup>12 24</sup> The increasing rate of primary PCI in recent years might be a  
46  
47 reason for the consistency of our findings and previous studies conducted specifically  
48  
49 among STEMI patients undergoing PCI  
50  
51  
52  
53  
54  
55  
56  
57  
58  
59  
60



1  
2  
3  
4 Complications including bleeding, heart failure and mechanical complications are more  
5  
6 likely to develop in women with acute myocardial infarction and increase the risk of  
7  
8 mortality.<sup>14 41 42</sup> Bleeding secondary to antithrombotic therapies and invasive procedures is  
9  
10 more frequent in women.<sup>43</sup> Three included studies reported incidence of bleeding following  
11  
12 STEMI and they all found that women were at higher risk of bleeding.<sup>10 13 18</sup> One study  
13  
14 included in our analysis examined the relationships among sex, acute heart failure, and  
15  
16 related outcomes after STEMI.<sup>14</sup> Its results demonstrate that women are at higher risk to  
17  
18 develop de novo heart failure after STEMI and women with de novo heart failure have  
19  
20 worse survival compared with man. However, we could not compare the incidence of these  
21  
22 complications due to the lack of sufficient data. Mechanical complications requiring surgical  
23  
24 intervention are also much more common in women after acute myocardial infarction and  
25  
26 associated with high mortality rates.<sup>44</sup>

27  
28  
29  
30  
31  
32  
33  
34  
35  
36  
37  
38 Several limitations of this meta-analysis should be considered. First, the included studies  
39  
40 are all observational studies except one post hoc analysis of randomized controlled trial.  
41  
42 Hence, there may be residual confounding bias inherent in the observational study design  
43  
44 in our meta-analysis. Second, in adjusted analysis, not all included studies adjusted for the  
45  
46 same confounders and not all studies reported adjusted RRs. **The confounders which were**  
47  
48 **adjusted in the included studies might differ greatly across studies.** Third, there was  
49  
50  
51  
52  
53  
54  
55  
56  
57  
58  
59  
60  
substantial heterogeneity in our meta-analysis, which could partly be attributed to the wide  
variability in the sample sizes, locations, and treatment regimens across included studies.  
**Additionally, although we calculated adjusted RRs for all-cause mortality, it needed to be**

1  
2  
3  
4 noted that relevant confounders might have differed across studies. Fourth, the analysis of  
5  
6 long-term mortality, especially the adjusted analysis, included far fewer studies compared  
7  
8 with analysis of short-term mortality. Hence, there might be significant bias in the results  
9  
10 about long-term mortality.  
11  
12  
13  
14  
15  
16

17 In conclusion, our meta-analysis, pooling data from contemporary literature, shows that  
18  
19 women with STENI have a higher risk of short-term mortality but not long-term mortality.  
20  
21 The effect of sex differences on mortality in patients with STEMI remain significant after  
22  
23 adjustment for baseline cardiovascular risk factors and clinical profiles, suggesting that  
24  
25 public awareness of increased risk and further improvements in management in women  
26  
27 with STEMI are necessary.  
28  
29  
30  
31  
32  
33  
34

#### 35 Other Information:

#### 40 Contribution statement

41  
42 Ziwei Xi: Study concepts, Study design, Literature research, Statistical analysis,  
43  
44 Manuscript preparation, Manuscript editing. Tingting Guo and Yong Wang: Data  
45  
46 acquisition, Data analysis/interpretation. Jianan Li, Yang Li, Jianfeng Zheng and Runlin  
47  
48 Gao: Manuscript revision/review. Hong Qiu: Manuscript final version approval.  
49  
50  
51  
52  
53  
54  
55

#### 56 Conflict of interest

57  
58 The authors declare that there is no conflict of interest.  
59  
60

## Funding

This research received no specific grant from any funding agency in the public, commercial, or not-for-profit sectors.

## Ethics approval

The institutional central committee at Fuwai Hospital approved that the study protocol and inform consent was not required for a systematic review and meta-analysis.

## Data sharing statement

As this is a systematic review and meta-analysis, the data used in the study have already been published by the authors of the included studies. All data relevant to the study are included in the article or uploaded as supplementary information.

Table 1 Characteristics of included studies.

| First Author | Year | Region       | Study design | Data source             | Multicenter | Time of enrollment      | Number of STEMI patients | Female          | Endpoint                                                          | Follow-up  |
|--------------|------|--------------|--------------|-------------------------|-------------|-------------------------|--------------------------|-----------------|-------------------------------------------------------------------|------------|
| Venetsanos   | 2017 | 13 countries | Prospective  | Clinical registry       | Yes         | Sep, 2011-<br>Oct, 2013 | 1,862                    | 369<br>(20.0)   | Major adverse cardiovascular events and definite stent thrombosis | 30 d       |
| Ali          | 2018 | Germany      | Prospective  | Administrative database | No          | 2013-2017               | 312                      | 101<br>(32.4)   | All-cause in-hospital mortality                                   | NA         |
| Langabeer    | 2018 | US           | Prospective  | Clinical registry       | Yes         | Jan, 2010-<br>Dec, 2015 | 9,674                    | 2,569<br>(26.6) | In-hospital mortality                                             | NA         |
| Tang         | 2018 | China        | Prospective  | Administrative database | No          | Jan, 2013-<br>Dec, 2013 | 1,238                    | 210 (1.9)       | Major adverse cardiac and cerebrovascular events                  | 730 ± 30 d |

|    |                  |      |           |               |               |     |             |        |           |                          |         |
|----|------------------|------|-----------|---------------|---------------|-----|-------------|--------|-----------|--------------------------|---------|
| 1  | <b>Cenko</b>     | 2019 | 12        | Prospective   | Clinical      | Yes | Jan, 2010-  | 10,443 | 3,112     | 30-day all-cause         | 30 d    |
| 2  |                  |      | Europea   |               | registry      |     | Jul, 2018   |        | (29.8)    | mortality                |         |
| 3  |                  |      | n         |               |               |     |             |        |           |                          |         |
| 4  |                  |      | countries |               |               |     |             |        |           |                          |         |
| 5  |                  |      |           |               |               |     |             |        |           |                          |         |
| 6  |                  |      |           |               |               |     |             |        |           |                          |         |
| 7  |                  |      |           |               |               |     |             |        |           |                          |         |
| 8  |                  |      |           |               |               |     |             |        |           |                          |         |
| 9  |                  |      |           |               |               |     |             |        |           |                          |         |
| 10 |                  |      |           |               |               |     |             |        |           |                          |         |
| 11 | <b>Hao</b>       | 2019 | China     | Prospective   | Clinical      | Yes | Nov, 2014-  | 50,203 | 11,016    | In-hospital mortality    | NA      |
| 12 |                  |      |           |               | registry      |     | Jun, 2018   |        | (21,9)    |                          |         |
| 13 |                  |      |           |               |               |     |             |        |           |                          |         |
| 14 |                  |      |           |               |               |     |             |        |           |                          |         |
| 15 |                  |      |           |               |               |     |             |        |           |                          |         |
| 16 |                  |      |           |               |               |     |             |        |           |                          |         |
| 17 | <b>Hannan</b>    | 2019 | US        | Retrospective | Administrativ | Yes | Jan, 2013-  | 23,809 | 7,791     | In hospital/30-day       | 30 d    |
| 18 |                  |      |           |               | e database    |     | Dec, 2015   |        | (32.7)    | mortality                |         |
| 19 |                  |      |           |               |               |     |             |        |           |                          |         |
| 20 |                  |      |           |               |               |     |             |        |           |                          |         |
| 21 |                  |      |           |               |               |     |             |        |           |                          |         |
| 22 | <b>Maznyczka</b> | 2019 | UK        | Retrospective | Clinical      | No  | July, 2011- | 324    | 87 (26.9) | All-cause death/ first   | 5 years |
| 23 |                  |      |           |               | registry      |     | Nov, 2012   |        |           | heart failure            |         |
| 24 |                  |      |           |               |               |     |             |        |           | hospitalization          |         |
| 25 |                  |      |           |               |               |     |             |        |           |                          |         |
| 26 |                  |      |           |               |               |     |             |        |           |                          |         |
| 27 |                  |      |           |               |               |     |             |        |           |                          |         |
| 28 |                  |      |           |               |               |     |             |        |           |                          |         |
| 29 |                  |      |           |               |               |     |             |        |           |                          |         |
| 30 | <b>Stehli</b>    | 2019 | Australia | Prospective   | Clinical      | Yes | 2013-2016   | 6,431  | 1,317     | In hospital/30-day major | 30 d    |
| 31 |                  |      |           |               | registry      |     |             |        | (20.5)    | adverse events, and      |         |
| 32 |                  |      |           |               |               |     |             |        |           | major bleeding           |         |
| 33 |                  |      |           |               |               |     |             |        |           |                          |         |
| 34 |                  |      |           |               |               |     |             |        |           |                          |         |
| 35 |                  |      |           |               |               |     |             |        |           |                          |         |
| 36 |                  |      |           |               |               |     |             |        |           |                          |         |
| 37 |                  |      |           |               |               |     |             |        |           |                          |         |
| 38 | <b>Burgess</b>   | 2020 | Australia | Prospective   | Administrativ | No  | Dec, 2010-  | 589    | 123 (21)  | Cardiac death and        | 2 years |
| 39 |                  |      |           |               |               |     |             |        |           |                          |         |
| 40 |                  |      |           |               |               |     |             |        |           |                          |         |
| 41 |                  |      |           |               |               |     |             |        |           |                          |         |
| 42 |                  |      |           |               |               |     |             |        |           |                          |         |
| 43 |                  |      |           |               |               |     |             |        |           |                          |         |
| 44 |                  |      |           |               |               |     |             |        |           |                          |         |
| 45 |                  |      |           |               |               |     |             |        |           |                          |         |
| 46 |                  |      |           |               |               |     |             |        |           |                          |         |

|                 |      |                 |               |                             |     |                         |        |                 |                                      |                    |
|-----------------|------|-----------------|---------------|-----------------------------|-----|-------------------------|--------|-----------------|--------------------------------------|--------------------|
|                 |      |                 |               | e database                  |     | Apr, 2014               |        |                 | myocardial infarction                |                    |
| <b>Dharma</b>   | 2020 | Indonesi<br>a   | Retrospective | Administrativ<br>e database | No  | Feb, 2011-<br>Aug, 2019 | 6,557  | 929<br>(14.2)   | All-cause mortality                  | 30 d and 1<br>year |
| <b>Kerkmanx</b> | 2020 | Netherla<br>nds | Retrospective | Administrativ<br>e database | Yes | 2015-2016               | 787    | 229 (29)        | All-cause mortality                  | 1 year             |
| <b>Siabani</b>  | 2020 | Iran            | Prospective   | Clinical<br>registry        | No  | Jun, 2016-<br>May, 2018 | 1,484  | 311(21)         | In-hospital mortality                | NA                 |
| <b>Tai</b>      | 2020 | China           | Retrospective | Administrativ<br>e database | No  | Jan, 2013-<br>Dec, 2017 | 182    | 56 (30.8)       | In hospital/1-year<br>mortality      | 1 year             |
| <b>Tizón</b>    | 2020 | Spain           | Prospective   | Clinical<br>registry        | Yes | 2010-2016               | 14,690 | 3,486<br>(23.7) | 30-day/1-year all-cause<br>mortality | 1 year             |

Table 2 Baseline characteristics of participants in included studies.

|              |             |                        |                |                    |                      |               |              |              |
|--------------|-------------|------------------------|----------------|--------------------|----------------------|---------------|--------------|--------------|
| <b>First</b> | <b>Year</b> | <b>Age, mean (SD),</b> | <b>Diabete</b> | <b>Hypertensio</b> | <b>Hyperlipidemi</b> | <b>Smokin</b> | <b>Prior</b> | <b>Prior</b> |
|--------------|-------------|------------------------|----------------|--------------------|----------------------|---------------|--------------|--------------|

| Author     | years | s, n (%)    |             | n, n (%)   |              | a, n (%)     |            | g, n (%)     |              | MI, n      | PCI, n       |            |              |           |            |
|------------|-------|-------------|-------------|------------|--------------|--------------|------------|--------------|--------------|------------|--------------|------------|--------------|-----------|------------|
|            |       | Female      | Male        | Female     | Male         | Female       | Male       | Female       | Male         | Female     | Male         | Female     | Male         |           |            |
| Venetsanos | 2017  | 69 (13.0)   | 59 (11.0)   | 48 (13.0)  | 205 (13.7)   | 190 (51.5)   | 605 (40.5) | 117 (31.7)   | 536 (35.9)   | NA         | NA           | 24 (6.5)   | 135 (9.0)    | 16 (4.3)  | 124 (8.3)  |
| Ali        | 2018  | NA          | NA          | NA         | NA           | NA           | NA         | NA           | NA           | NA         | NA           | NA         | NA           | NA        | NA         |
| Langabeer  | 2018  | 62.5 (13.6) | 60.2 (12.5) | 759 (29.6) | 1,975 (27.8) | NA           | NA         | 1,265 (49.3) | 3,693 (52.0) | 951 (37.0) | 2,763 (38.9) | 435 (16.9) | 1,304 (18.4) | NA        | NA         |
| Tang       | 2018  | 64.5 (9.3)  | 54.4 (10.7) | 66 (31.4)  | 311 (25.1)   | 141 (67.1)   | 659 (53.3) | 125 (59.5)   | 749 (60.3)   | 33 (15.7)  | 957 (77.3)   | 10 (4.8)   | 83 (6.7)     | 60 (28.6) | 282 (22.8) |
| Cenko      | 2019  | 66.1        | 59.7        | 925        | 1,531        | 2,322 (74.6) | 4,502      | 1,353 (43.3) | 3,100        | 1,010      | 3,714        | 301        | 842          | 306       | 762        |

|                       |      |         |           |         |       |           |       |               |       |        |       |         |       |        |       |
|-----------------------|------|---------|-----------|---------|-------|-----------|-------|---------------|-------|--------|-------|---------|-------|--------|-------|
|                       |      | (11.7)  | (11.7)    | (29.7)  | (20.9 |           | (61.4 |               | (42.3 | (32.5) | (50.7 | (9.7)   | (11.5 | (9.8)  | (10.4 |
|                       |      |         |           | )       | )     |           | )     |               | )     |        | )     |         | )     |        | )     |
| <b>Hao</b>            | 2019 | 69.0    | 61.1      | 10,141  | 24,08 | 15,607    | 38,42 | 17,996 (85.4) | 50,94 | 1,719  | 32,37 | NA      | NA    | NA     | NA    |
|                       |      | (10.6)  | (12.4)    | (48.1)  | 2     | (74.1)    | 6     |               | 4     | (8.2)  | 7     |         |       |        |       |
|                       |      |         |           |         | (39.4 |           | (62.9 |               | (83.3 |        | (53.0 |         |       |        |       |
|                       |      |         |           | )       | )     |           | )     |               | )     |        | )     |         |       |        |       |
| <b>Hannan</b>         | 2019 | 70.72   | 62.11     | NA      | NA    | NA        | NA    | NA            | NA    | NA     | NA    | NA      | NA    | 868    | 2206  |
|                       |      | (14.73) | (12.82)   |         |       |           |       |               |       |        |       |         |       | (11.1) | (13.8 |
|                       |      |         |           |         |       |           |       |               |       |        |       |         |       |        | )     |
| <b>Maznyczk<br/>a</b> | 2019 | 61.2    | 58.6(11.2 | 8 (9.2) | 26    | 32 (36.8) | 73    | 28 (32.2)     | 66    | 57     | 139   | 5 (5.7) | 20    | 2      | 16    |
|                       |      | (12.2)  | )         |         | (11.0 |           | (30.8 |               | (27.8 | (65.5) | (58.6 |         | (8.4) | (2.3)  | (6.8) |
|                       |      |         |           |         | )     |           | )     |               | )     |        | )     |         |       |        |       |
| <b>Stehli</b>         | 2019 | 66.5    | 60.8      | 245     | 770   | NA        | NA    | NA            | NA    | NA     | NA    | NA      | NA    | 104    | 577   |
|                       |      | (13.2)  | (12.2)    | (18.6)  | (15.1 |           |       |               |       |        |       |         |       | (7.9)  | (11.3 |
|                       |      |         |           |         | )     |           |       |               |       |        |       |         |       |        | )     |



|    |                 |      |         |         |        |       |            |       |            |       |          |       |         |        |       |    |
|----|-----------------|------|---------|---------|--------|-------|------------|-------|------------|-------|----------|-------|---------|--------|-------|----|
| 1  | <b>Burgess</b>  | 2020 | 62.7    | 58.2    | 39     | 88    | 84 (68.3)  | 243   | 83 (67.5)  | 253   | 64       | 252   | 9 (7.3) | 41     | NA    | NA |
| 2  |                 |      | (52.7-  | (50.6-  | (31.7) | (18.9 | (52.1      | (52.3 | (52.0)     | (54.1 | (8.8)    |       |         |        |       |    |
| 3  |                 |      | 73.2)   | 65.7)   | )      | )     | )          | )     | )          | )     |          |       |         |        |       |    |
| 4  |                 |      |         |         |        |       |            |       |            |       |          |       |         |        |       |    |
| 5  |                 |      |         |         |        |       |            |       |            |       |          |       |         |        |       |    |
| 6  |                 |      |         |         |        |       |            |       |            |       |          |       |         |        |       |    |
| 7  |                 |      |         |         |        |       |            |       |            |       |          |       |         |        |       |    |
| 8  |                 |      |         |         |        |       |            |       |            |       |          |       |         |        |       |    |
| 9  | <b>Dharma</b>   | 2020 | 60 (10) | 55 (10) | 403    | 1548  | 647 (69.6) | 2,889 | 299 (32.2) | 1,779 | 109      | 4,049 | NA      | NA     | NA    | NA |
| 10 |                 |      |         |         | (43.4) | (27.5 | (51.3      | (31.6 | (11.7)     | (71.9 |          |       |         |        |       |    |
| 11 |                 |      |         |         | )      | )     | )          | )     | )          | )     |          |       |         |        |       |    |
| 12 |                 |      |         |         |        |       |            |       |            |       |          |       |         |        |       |    |
| 13 |                 |      |         |         |        |       |            |       |            |       |          |       |         |        |       |    |
| 14 |                 |      |         |         |        |       |            |       |            |       |          |       |         |        |       |    |
| 15 |                 |      |         |         |        |       |            |       |            |       |          |       |         |        |       |    |
| 16 |                 |      |         |         |        |       |            |       |            |       |          |       |         |        |       |    |
| 17 | <b>Kerkmanx</b> | 2020 | 68 (14) | 61 (12) | 39     | 66    | 101 (45.7) | 178   | 56 (25.9)  | 110   | 88       | 258   | 30      | 79     | 33    | 77 |
| 18 |                 |      |         |         | (17.6) | (12.5 | (33.6      | (21.0 | (41.1)     | (49.3 | (13.6)   | (13.7 | (14.4)  | (14.2  |       |    |
| 19 |                 |      |         |         | )      | )     | )          | )     | )          | )     | )        | )     | )       | )      |       |    |
| 20 |                 |      |         |         |        |       |            |       |            |       |          |       |         |        |       |    |
| 21 |                 |      |         |         |        |       |            |       |            |       |          |       |         |        |       |    |
| 22 |                 |      |         |         |        |       |            |       |            |       |          |       |         |        |       |    |
| 23 |                 |      |         |         |        |       |            |       |            |       |          |       |         |        |       |    |
| 24 | <b>Siabani</b>  | 2020 | 65.8    | 59.0    | 114    | 187   | 195 (63.7) | 410   | 110 (36.7) | 208   | 41       | 655   | NA      | NA     | NA    | NA |
| 25 |                 |      | (11.3)  | (12.4)  | (37.7) | (16.2 | (35.4      | (18.5 | (13.2)     | (55.9 |          |       |         |        |       |    |
| 26 |                 |      |         |         | )      | )     | )          | )     | )          | )     |          |       |         |        |       |    |
| 27 |                 |      |         |         |        |       |            |       |            |       |          |       |         |        |       |    |
| 28 |                 |      |         |         |        |       |            |       |            |       |          |       |         |        |       |    |
| 29 |                 |      |         |         |        |       |            |       |            |       |          |       |         |        |       |    |
| 30 |                 |      |         |         |        |       |            |       |            |       |          |       |         |        |       |    |
| 31 |                 |      |         |         |        |       |            |       |            |       |          |       |         |        |       |    |
| 32 | <b>Tai</b>      | 2020 | 78 (76- | 78 (76- | 96     | 116   | 217 (79.5) | 319   | NA         | NA    | 14 (5.4) | 239   | NA      | NA     | 36    | 78 |
| 33 |                 |      | 81)     | 80)     | (35.2) | (26.5 | (72.8      |       |            |       | (56.5    |       |         | (13.5) | (18.1 |    |
| 34 |                 |      |         |         | )      | )     | )          |       |            |       | )        |       |         |        | )     |    |
| 35 |                 |      |         |         |        |       |            |       |            |       |          |       |         |        |       |    |
| 36 |                 |      |         |         |        |       |            |       |            |       |          |       |         |        |       |    |
| 37 |                 |      |         |         |        |       |            |       |            |       |          |       |         |        |       |    |
| 38 |                 |      |         |         |        |       |            |       |            |       |          |       |         |        |       |    |
| 39 |                 |      |         |         |        |       |            |       |            |       |          |       |         |        |       |    |
| 40 |                 |      |         |         |        |       |            |       |            |       |          |       |         |        |       |    |
| 41 |                 |      |         |         |        |       |            |       |            |       |          |       |         |        |       |    |
| 42 |                 |      |         |         |        |       |            |       |            |       |          |       |         |        |       |    |
| 43 |                 |      |         |         |        |       |            |       |            |       |          |       |         |        |       |    |
| 44 |                 |      |         |         |        |       |            |       |            |       |          |       |         |        |       |    |
| 45 |                 |      |         |         |        |       |            |       |            |       |          |       |         |        |       |    |
| 46 |                 |      |         |         |        |       |            |       |            |       |          |       |         |        |       |    |

|    |              |      |        |        |        |       |              |       |            |       |        |       |    |    |    |    |
|----|--------------|------|--------|--------|--------|-------|--------------|-------|------------|-------|--------|-------|----|----|----|----|
| 1  | <b>Tizón</b> | 2020 | 69.9   | 60.9   | 844    | 1,927 | 1,192 (34.2) | 2,722 | 878 (25.2) | 2,375 | 474    | 2,711 | NA | NA | NA | NA |
| 2  |              |      |        |        |        |       |              |       |            |       |        |       |    |    |    |    |
| 3  |              |      | (13.7) | (12.6) | (24.2) | (17.2 |              | (24.3 |            | (21.2 | (13.6) | (24.2 |    |    |    |    |
| 4  |              |      |        |        |        | )     |              | )     |            | )     |        | )     |    |    |    |    |
| 5  |              |      |        |        |        |       |              |       |            |       |        |       |    |    |    |    |
| 6  |              |      |        |        |        |       |              |       |            |       |        |       |    |    |    |    |
| 7  |              |      |        |        |        |       |              |       |            |       |        |       |    |    |    |    |
| 8  |              |      |        |        |        |       |              |       |            |       |        |       |    |    |    |    |
| 9  |              |      |        |        |        |       |              |       |            |       |        |       |    |    |    |    |
| 10 |              |      |        |        |        |       |              |       |            |       |        |       |    |    |    |    |
| 11 |              |      |        |        |        |       |              |       |            |       |        |       |    |    |    |    |
| 12 |              |      |        |        |        |       |              |       |            |       |        |       |    |    |    |    |
| 13 |              |      |        |        |        |       |              |       |            |       |        |       |    |    |    |    |
| 14 |              |      |        |        |        |       |              |       |            |       |        |       |    |    |    |    |
| 15 |              |      |        |        |        |       |              |       |            |       |        |       |    |    |    |    |
| 16 |              |      |        |        |        |       |              |       |            |       |        |       |    |    |    |    |
| 17 |              |      |        |        |        |       |              |       |            |       |        |       |    |    |    |    |
| 18 |              |      |        |        |        |       |              |       |            |       |        |       |    |    |    |    |
| 19 |              |      |        |        |        |       |              |       |            |       |        |       |    |    |    |    |
| 20 |              |      |        |        |        |       |              |       |            |       |        |       |    |    |    |    |
| 21 |              |      |        |        |        |       |              |       |            |       |        |       |    |    |    |    |
| 22 |              |      |        |        |        |       |              |       |            |       |        |       |    |    |    |    |
| 23 |              |      |        |        |        |       |              |       |            |       |        |       |    |    |    |    |
| 24 |              |      |        |        |        |       |              |       |            |       |        |       |    |    |    |    |
| 25 |              |      |        |        |        |       |              |       |            |       |        |       |    |    |    |    |
| 26 |              |      |        |        |        |       |              |       |            |       |        |       |    |    |    |    |
| 27 |              |      |        |        |        |       |              |       |            |       |        |       |    |    |    |    |
| 28 |              |      |        |        |        |       |              |       |            |       |        |       |    |    |    |    |
| 29 |              |      |        |        |        |       |              |       |            |       |        |       |    |    |    |    |
| 30 |              |      |        |        |        |       |              |       |            |       |        |       |    |    |    |    |
| 31 |              |      |        |        |        |       |              |       |            |       |        |       |    |    |    |    |
| 32 |              |      |        |        |        |       |              |       |            |       |        |       |    |    |    |    |
| 33 |              |      |        |        |        |       |              |       |            |       |        |       |    |    |    |    |
| 34 |              |      |        |        |        |       |              |       |            |       |        |       |    |    |    |    |
| 35 |              |      |        |        |        |       |              |       |            |       |        |       |    |    |    |    |
| 36 |              |      |        |        |        |       |              |       |            |       |        |       |    |    |    |    |
| 37 |              |      |        |        |        |       |              |       |            |       |        |       |    |    |    |    |
| 38 |              |      |        |        |        |       |              |       |            |       |        |       |    |    |    |    |
| 39 |              |      |        |        |        |       |              |       |            |       |        |       |    |    |    |    |
| 40 |              |      |        |        |        |       |              |       |            |       |        |       |    |    |    |    |
| 41 |              |      |        |        |        |       |              |       |            |       |        |       |    |    |    |    |
| 42 |              |      |        |        |        |       |              |       |            |       |        |       |    |    |    |    |
| 43 |              |      |        |        |        |       |              |       |            |       |        |       |    |    |    |    |
| 44 |              |      |        |        |        |       |              |       |            |       |        |       |    |    |    |    |
| 45 |              |      |        |        |        |       |              |       |            |       |        |       |    |    |    |    |
| 46 |              |      |        |        |        |       |              |       |            |       |        |       |    |    |    |    |

For peer review only

## Reference:

1. Virani SS, Alonso A, Benjamin EJ, et al. Heart Disease and Stroke Statistics-2020 Update: A Report From the American Heart Association. *Circulation* 2020;141(9):e139-e596. doi: 10.1161/cir.0000000000000757 [published Online First: 2020/01/30]
2. Pancholy SB, Shantha GP, Patel T, et al. Sex differences in short-term and long-term all-cause mortality among patients with ST-segment elevation myocardial infarction treated by primary percutaneous intervention: a meta-analysis. *JAMA internal medicine* 2014;174(11):1822-30. doi: 10.1001/jamainternmed.2014.4762 [published Online First: 2014/09/30]
3. Wenger NK, Arnold A, Bairey Merz CN, et al. Hypertension Across a Woman's Life Cycle. *Journal of the American College of Cardiology* 2018;71(16):1797-813. doi: 10.1016/j.jacc.2018.02.033 [published Online First: 2018/04/21]
4. Peters SAE, Woodward M. Sex Differences in the Burden and Complications of Diabetes. *Current diabetes reports* 2018;18(6):33. doi: 10.1007/s11892-018-1005-5 [published Online First: 2018/04/20]
5. Huded CP, Johnson M, Kravitz K, et al. 4-Step Protocol for Disparities in STEMI Care and Outcomes in Women. *Journal of the American College of Cardiology* 2018;71(19):2122-32. doi: 10.1016/j.jacc.2018.02.039 [published Online First: 2018/03/15]
6. Mehta LS, Beckie TM, DeVon HA, et al. Acute Myocardial Infarction in Women: A Scientific Statement From the American Heart Association. *Circulation* 2016;133(9):916-47. doi: 10.1161/cir.0000000000000351 [published Online First: 2016/01/27]

- 1  
2  
3  
4 7. Reed GW, Rossi JE, Cannon CP. Acute myocardial infarction. *Lancet (London, England)*  
5  
6 2017;389(10065):197-210. doi: 10.1016/s0140-6736(16)30677-8 [published Online  
7  
8 First: 2016/08/10]  
9  
10
- 11 8. Moher D, Liberati A, Tetzlaff J, et al. Preferred reporting items for systematic reviews and  
12  
13 meta-analyses: the PRISMA statement. *BMJ (Clinical research ed)* 2009;339:b2535.  
14  
15 doi: 10.1136/bmj.b2535 [published Online First: 2009/07/23]  
16  
17
- 18 9. Stang A. Critical evaluation of the Newcastle-Ottawa scale for the assessment of the quality  
19  
20 of nonrandomized studies in meta-analyses. *European journal of epidemiology*  
21  
22 2010;25(9):603-5. doi: 10.1007/s10654-010-9491-z [published Online First:  
23  
24 2010/07/24]  
25  
26
- 27 10. Venetsanos D, Sederholm Lawesson S, Alfredsson J, et al. Association between gender  
28  
29 and short-term outcome in patients with ST elevation myocardial infraction participating  
30  
31 in the international, prospective, randomised Administration of Ticagrelor in the  
32  
33 catheterisation Laboratory or in the Ambulance for New ST elevation myocardial  
34  
35 Infarction to open the Coronary artery (ATLANTIC) trial: a prespecified analysis. *BMJ*  
36  
37 *open* 2017;7(9):e015241. doi: 10.1136/bmjopen-2016-015241 [published Online First:  
38  
39 2017/09/25]  
40  
41
- 42 11. Ali M, Lange SA, Wittlinger T, et al. In-hospital mortality after acute STEMI in patients  
43  
44 undergoing primary PCI. *Herz* 2018;43(8):741-45. doi: 10.1007/s00059-017-4621-y  
45  
46 [published Online First: 2017/10/11]  
47  
48
- 49 12. Langabeer JR, 2nd, Henry TD, Fowler R, et al. Sex-Based Differences in Discharge  
50  
51 Disposition and Outcomes for ST-Segment Elevation Myocardial Infarction Patients  
52  
53  
54  
55  
56  
57  
58  
59  
60

- 1  
2  
3  
4 Within a Regional Network. *Journal of women's health (2002)* 2018;27(8):1001-06. doi:  
5  
6 10.1089/jwh.2017.6553 [published Online First: 2018/01/11]  
7  
8  
9 13. Tang XF, Song Y, Xu JJ, et al. Effect of sex difference in clinical presentation (stable  
10  
11 coronary artery disease vs unstable angina pectoris or non-ST-elevation myocardial  
12  
13 infarction vs ST-elevation myocardial infarction) on 2-year outcomes in patients  
14  
15 undergoing percutaneous coronary intervention. *Journal of interventional cardiology*  
16  
17 2018;31(1):5-14. doi: 10.1111/joic.12451 [published Online First: 2017/10/13]  
18  
19  
20  
21  
22 14. Cenko E, van der Schaar M, Yoon J, et al. Sex-Related Differences in Heart Failure After  
23  
24 ST-Segment Elevation Myocardial Infarction. *Journal of the American College of*  
25  
26 *Cardiology* 2019;74(19):2379-89. doi: 10.1016/j.jacc.2019.08.1047 [published Online  
27  
28 First: 2019/11/09]  
29  
30  
31  
32 15. Hao Y, Liu J, Liu J, et al. Sex Differences in In-Hospital Management and Outcomes of  
33  
34 Patients With Acute Coronary Syndrome. *Circulation* 2019;139(15):1776-85. doi:  
35  
36 10.1161/circulationaha.118.037655 [published Online First: 2019/01/23]  
37  
38  
39  
40 16. Hannan EL, Wu Y, Tamis-Holland J, et al. Sex differences in the treatment and outcomes  
41  
42 of patients hospitalized with ST-elevation myocardial infarction. *Catheterization and*  
43  
44 *cardiovascular interventions : official journal of the Society for Cardiac Angiography &*  
45  
46 *Interventions* 2020;95(2):196-204. doi: 10.1002/ccd.28286 [published Online First:  
47  
48 2019/04/24]  
49  
50  
51  
52 17. Maznyczka AM, Carrick D, Carberry J, et al. Sex-based associations with microvascular  
53  
54 injury and outcomes after ST-segment elevation myocardial infarction. *Open heart*  
55  
56 2019;6(1):e000979. doi: 10.1136/openhrt-2018-000979 [published Online First:  
57  
58  
59  
60

- 2019/06/07]
18. Stehli J, Martin C, Brennan A, et al. Sex Differences Persist in Time to Presentation, Revascularization, and Mortality in Myocardial Infarction Treated With Percutaneous Coronary Intervention. *Journal of the American Heart Association* 2019;8(10):e012161. doi: 10.1161/jaha.119.012161 [published Online First: 2019/05/17]
19. Burgess SN, Juergens CP, Nguyen TL, et al. Comparison of Late Cardiac Death and Myocardial Infarction Rates in Women Vs Men With ST-Elevation Myocardial Infarction. *The American journal of cardiology* 2020;128:120-26. doi: 10.1016/j.amjcard.2020.04.044 [published Online First: 2020/07/12]
20. Dharma S, Dakota I, Andriantoro H, et al. Association of gender with clinical outcomes of patients with acute ST-segment elevation myocardial infarction presenting with acute heart failure. *Coronary artery disease* 2020 doi: 10.1097/mca.0000000000000892 [published Online First: 2020/04/26]
21. Kerkman T, Ten Brinke LBG, Huybrechts B, et al. Evaluation of sex differences in patients with ST-elevated myocardial infarction: an observational cohort study in Amsterdam and surrounding region. *Netherlands heart journal : monthly journal of the Netherlands Society of Cardiology and the Netherlands Heart Foundation* 2020;28(11):595-603. doi: 10.1007/s12471-020-01435-9 [published Online First: 2020/06/13]
22. Siabani S, Davidson PM, Babakhani M, et al. Gender-based difference in early mortality among patients with ST-segment elevation myocardial infarction: insights from Kermanshah STEMI Registry. *Journal of cardiovascular and thoracic research* 2020;12(1):63-68. doi: 10.34172/jcvtr.2020.10 [published Online First: 2020/03/27]

- 1  
2  
3  
4 23. Tai S, Li X, Yang H, et al. Sex Differences in the Outcomes of Elderly Patients with Acute  
5  
6 Coronary Syndrome. *Cardiology research and practice* 2020;2020:5091490. doi:  
7  
8 10.1155/2020/5091490 [published Online First: 2020/05/27]  
9  
10  
11 24. Tizón-Marcos H, Vaquerizo B, Marrugat J, et al. Differences in 30-day complications and  
12  
13 1-year mortality by sex in patients with a first STEMI managed by the Codi IAM network  
14  
15 between 2010 and 2016. *Revista española de cardiología (English ed)* 2020 doi:  
16  
17 10.1016/j.rec.2020.06.002 [published Online First: 2020/07/15]  
18  
19  
20 25. Bavishi C, Bangalore S, Patel D, et al. Short and long-term mortality in women and men  
21  
22 undergoing primary angioplasty: A comprehensive meta-analysis. *International journal*  
23  
24 *of cardiology* 2015;198:123-30. doi: 10.1016/j.ijcard.2015.07.001 [published Online  
25  
26 First: 2015/07/15]  
27  
28  
29 26. Kosmidou I, Redfors B, Selker HP, et al. Infarct size, left ventricular function, and prognosis  
30  
31 in women compared to men after primary percutaneous coronary intervention in ST-  
32  
33 segment elevation myocardial infarction: results from an individual patient-level pooled  
34  
35 analysis of 10 randomized trials. *European heart journal* 2017;38(21):1656-63. doi:  
36  
37 10.1093/eurheartj/ehx159 [published Online First: 2017/04/14]  
38  
39  
40 27. Millett ERC, Peters SAE, Woodward M. Sex differences in risk factors for myocardial  
41  
42 infarction: cohort study of UK Biobank participants. *BMJ (Clinical research ed)*  
43  
44 2018;363:k4247. doi: 10.1136/bmj.k4247 [published Online First: 2018/11/09]  
45  
46  
47 28. Yusuf S, Hawken S, Ounpuu S, et al. Effect of potentially modifiable risk factors associated  
48  
49 with myocardial infarction in 52 countries (the INTERHEART study): case-control study.  
50  
51 *Lancet (London, England)* 2004;364(9438):937-52. doi: 10.1016/s0140-  
52  
53  
54  
55  
56  
57  
58  
59  
60

- 1  
2  
3  
4 6736(04)17018-9 [published Online First: 2004/09/15]  
5  
6  
7 29. Harreiter J, Fadl H, Kautzky-Willer A, et al. Do Women with Diabetes Need More Intensive  
8  
9 Action for Cardiovascular Reduction than Men with Diabetes? *Current diabetes reports*  
10  
11 2020;20(11):61. doi: 10.1007/s11892-020-01348-2 [published Online First: 2020/10/10]  
12  
13  
14 30. Arora S, Stouffer GA, Kucharska-Newton AM, et al. Twenty Year Trends and Sex  
15  
16 Differences in Young Adults Hospitalized With Acute Myocardial Infarction. *Circulation*  
17  
18 2019;139(8):1047-56. doi: 10.1161/circulationaha.118.037137 [published Online First:  
19  
20 2018/12/28]  
21  
22  
23  
24 31. Zhao M, Woodward M, Vaartjes I, et al. Sex Differences in Cardiovascular Medication  
25  
26 Prescription in Primary Care: A Systematic Review and Meta-Analysis. *Journal of the*  
27  
28 *American Heart Association* 2020;9(11):e014742. doi: 10.1161/jaha.119.014742  
29  
30 [published Online First: 2020/05/21]  
31  
32  
33  
34 32. Eindhoven DC, Hilt AD, Zwaan TC, et al. Age and gender differences in medical adherence  
35  
36 after myocardial infarction: Women do not receive optimal treatment - The Netherlands  
37  
38 claims database. *European journal of preventive cardiology* 2018;25(2):181-89. doi:  
39  
40 10.1177/2047487317744363 [published Online First: 2017/11/23]  
41  
42  
43  
44 33. Smolina K, Ball L, Humphries KH, et al. Sex Disparities in Post-Acute Myocardial Infarction  
45  
46 Pharmacologic Treatment Initiation and Adherence: Problem for Young Women.  
47  
48 *Circulation Cardiovascular quality and outcomes* 2015;8(6):586-92. doi:  
49  
50 10.1161/circoutcomes.115.001987 [published Online First: 2015/10/16]  
51  
52  
53  
54 34. Nguyen HL, Goldberg RJ, Gore JM, et al. Age and sex differences, and changing trends,  
55  
56 in the use of evidence-based therapies in acute coronary syndromes: perspectives  
57  
58  
59  
60



- 1  
2  
3  
4 from a multinational registry. *Coronary artery disease* 2010;21(6):336-44. doi:  
5  
6 10.1097/MCA.0b013e32833ce07c [published Online First: 2010/07/28]  
7  
8  
9 35. Pelletier R, Humphries KH, Shimony A, et al. Sex-related differences in access to care  
10  
11 among patients with premature acute coronary syndrome. *CMAJ : Canadian Medical*  
12  
13 *Association journal = journal de l'Association medicale canadienne* 2014;186(7):497-  
14  
15 504. doi: 10.1503/cmaj.131450 [published Online First: 2014/03/19]  
16  
17  
18 36. Murphy AC, Yudi MB, Farouque O, et al. Impact of Gender and Door-to-Balloon Times on  
19  
20 Long-Term Mortality in Patients Presenting With ST-Elevation Myocardial Infarction.  
21  
22 *The American journal of cardiology* 2019;124(6):833-41. doi:  
23  
24 10.1016/j.amjcard.2019.06.008 [published Online First: 2019/07/23]  
25  
26  
27 37. D'Onofrio G, Safdar B, Lichtman JH, et al. Sex differences in reperfusion in young patients  
28  
29 with ST-segment-elevation myocardial infarction: results from the VIRGO study.  
30  
31 *Circulation* 2015;131(15):1324-32. doi: 10.1161/circulationaha.114.012293 [published  
32  
33 Online First: 2015/03/21]  
34  
35  
36 38. Bugiardini R, Ricci B, Cenko E, et al. Delayed Care and Mortality Among Women and Men  
37  
38 With Myocardial Infarction. *Journal of the American Heart Association* 2017;6(8) doi:  
39  
40 10.1161/jaha.117.005968 [published Online First: 2017/09/02]  
41  
42  
43 39. Khan NA, Daskalopoulou SS, Karp I, et al. Sex differences in acute coronary syndrome  
44  
45 symptom presentation in young patients. *JAMA internal medicine* 2013;173(20):1863-  
46  
47 71. doi: 10.1001/jamainternmed.2013.10149 [published Online First: 2013/09/18]  
48  
49  
50 40. Canto JG, Rogers WJ, Goldberg RJ, et al. Association of age and sex with myocardial  
51  
52 infarction symptom presentation and in-hospital mortality. *Jama* 2012;307(8):813-22.  
53  
54  
55  
56  
57  
58  
59  
60

1  
2  
3  
4 doi: 10.1001/jama.2012.199 [published Online First: 2012/02/24]  
5

6  
7 41. Moscucci M, Fox KA, Cannon CP, et al. Predictors of major bleeding in acute coronary  
8  
9 syndromes: the Global Registry of Acute Coronary Events (GRACE). *European heart*  
10  
11 *journal* 2003;24(20):1815-23. doi: 10.1016/s0195-668x(03)00485-8 [published Online  
12  
13  
14 First: 2003/10/18]  
15

16  
17 42. Kolte D, Khera S, Aronow WS, et al. Trends in incidence, management, and outcomes of  
18  
19 cardiogenic shock complicating ST-elevation myocardial infarction in the United States.  
20  
21 *Journal of the American Heart Association* 2014;3(1):e000590. doi:  
22  
23 10.1161/jaha.113.000590 [published Online First: 2014/01/15]  
24  
25

26  
27 43. Nanna MG, Hajduk AM, Krumholz HM, et al. Sex-Based Differences in Presentation,  
28  
29 Treatment, and Complications Among Older Adults Hospitalized for Acute Myocardial  
30  
31 Infarction: The SILVER-AMI Study. *Circulation Cardiovascular quality and outcomes*  
32  
33 2019;12(10):e005691. doi: 10.1161/circoutcomes.119.005691 [published Online First:  
34  
35 2019/10/15]  
36  
37

38  
39 44. Elbadawi A, Elgendy IY, Mahmoud K, et al. Temporal Trends and Outcomes of Mechanical  
40  
41 Complications in Patients With Acute Myocardial Infarction. *JACC Cardiovascular*  
42  
43 *interventions* 2019;12(18):1825-36. doi: 10.1016/j.jcin.2019.04.039 [published Online  
44  
45  
46 First: 2019/09/21]  
47  
48  
49  
50  
51  
52  
53  
54  
55  
56  
57  
58  
59  
60

1  
2  
3  
4 Figure 1 Flowchart of selection of studies included in meta-analysis.  
5  
6  
7  
8

9 Figure 2 Forest plots of relative risks of short-term all-cause mortality among women and  
10 men with ST-segment elevation myocardial infarction.  
11  
12

13 Forest plots showing unadjusted (A) and adjusted (B) short-term all-cause mortality of  
14 women compared with men with ST-segment elevation myocardial infarction using  
15 random-effects model.  
16  
17  
18  
19  
20  
21  
22  
23  
24

25 Figure 3 Forest plots of relative risks of long-term all-cause mortality among women and  
26 men with ST-segment elevation myocardial infarction.  
27  
28

29 Forest plots showing unadjusted (A) and adjusted (B) long-term all-cause mortality of  
30 women compared with men with ST-segment elevation myocardial infarction using  
31 random-effects model.  
32  
33  
34  
35  
36  
37  
38  
39  
40  
41  
42  
43  
44  
45  
46  
47  
48  
49  
50  
51  
52  
53  
54  
55  
56  
57  
58  
59  
60

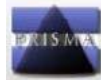

## PRISMA 2020 Checklist

| Section and Topic             | Item # | Checklist item                                                                                                                                                                                                                                                                                       | Location where item is reported |
|-------------------------------|--------|------------------------------------------------------------------------------------------------------------------------------------------------------------------------------------------------------------------------------------------------------------------------------------------------------|---------------------------------|
| <b>TITLE</b>                  |        |                                                                                                                                                                                                                                                                                                      |                                 |
| Title                         | 1      | Identify the report as a systematic review.                                                                                                                                                                                                                                                          | Title                           |
| <b>ABSTRACT</b>               |        |                                                                                                                                                                                                                                                                                                      |                                 |
| Abstract                      | 2      | See the PRISMA 2020 for Abstracts checklist.                                                                                                                                                                                                                                                         | Abstract                        |
| <b>INTRODUCTION</b>           |        |                                                                                                                                                                                                                                                                                                      |                                 |
| Rationale                     | 3      | Describe the rationale for the review in the context of existing knowledge.                                                                                                                                                                                                                          | Page 4                          |
| Objectives                    | 4      | Provide an explicit statement of the objective(s) or question(s) the review addresses.                                                                                                                                                                                                               | Page 4                          |
| <b>METHODS</b>                |        |                                                                                                                                                                                                                                                                                                      |                                 |
| Eligibility criteria          | 5      | Specify the inclusion and exclusion criteria for the review and how studies were grouped for the syntheses.                                                                                                                                                                                          | Page 5                          |
| Information sources           | 6      | Specify all databases, registers, websites, organisations, reference lists and other sources searched or consulted to identify studies. Specify the date when each source was last searched or consulted.                                                                                            | Page 4                          |
| Search strategy               | 7      | Present the full search strategies for all databases, registers and websites, including any filters and limits used.                                                                                                                                                                                 | Page 4                          |
| Selection process             | 8      | Specify the methods used to decide whether a study met the inclusion criteria of the review, including how many reviewers screened each record and each report retrieved, whether they worked independently, and if applicable, details of automation tools used in the process.                     | Page 5                          |
| Data collection process       | 9      | Specify the methods used to collect data from reports, including how many reviewers collected data from each report, whether they worked independently, any processes for obtaining or confirming data from study investigators, and if applicable, details of automation tools used in the process. | Page 5                          |
| Data items                    | 10a    | List and define all outcomes for which data were sought. Specify whether all results that were compatible with each outcome domain in each study were sought (e.g. for all measures, time points, analyses), and if not, the methods used to decide which results to collect.                        | Page 5                          |
|                               | 10b    | List and define all other variables for which data were sought (e.g. participant and intervention characteristics, funding sources). Describe any assumptions made about any missing or unclear information.                                                                                         | Page 5                          |
| Study risk of bias assessment | 11     | Specify the methods used to assess risk of bias in the included studies, including details of the tool(s) used, how many reviewers assessed each study and whether they worked independently, and if applicable, details of automation tools used in the process.                                    | Page 5                          |
| Effect measures               | 12     | Specify for each outcome the effect measure(s) (e.g. risk ratio, mean difference) used in the synthesis or presentation of results.                                                                                                                                                                  | Page 5                          |
| Synthesis methods             | 13a    | Describe the processes used to decide which studies were eligible for each synthesis (e.g. tabulating the study intervention characteristics and comparing against the planned groups for each synthesis (item #5)).                                                                                 | Page 5                          |
|                               | 13b    | Describe any methods required to prepare the data for presentation or synthesis, such as handling of missing summary statistics, or data conversions.                                                                                                                                                | Page 5                          |
|                               | 13c    | Describe any methods used to tabulate or visually display results of individual studies and syntheses.                                                                                                                                                                                               | Page 5                          |
|                               | 13d    | Describe any methods used to synthesize results and provide a rationale for the choice(s). If meta-analysis was performed, describe the model(s), method(s) to identify the presence and extent of statistical heterogeneity, and software package(s) used.                                          | Page 5                          |
|                               | 13e    | Describe any methods used to explore possible causes of heterogeneity among study results (e.g. subgroup analysis, meta-regression).                                                                                                                                                                 | Page 5                          |
|                               | 13f    | Describe any sensitivity analyses conducted to assess robustness of the synthesized results.                                                                                                                                                                                                         | Page 5                          |
| Reporting bias assessment     | 14     | Describe any methods used to assess risk of bias due to missing results in a synthesis (arising from reporting biases).                                                                                                                                                                              | Page 5                          |
| Certainty assessment          | 15     | Describe any methods used to assess certainty (or confidence) in the body of evidence for an outcome.                                                                                                                                                                                                | Page 5                          |

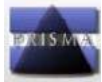

## PRISMA 2020 Checklist

1  
2  
3  
4  
5  
6  
7  
8  
9  
10  
11  
12  
13  
14  
15  
16  
17  
18  
19  
20  
21  
22  
23  
24  
25  
26  
27  
28  
29  
30  
31  
32  
33  
34  
35  
36  
37  
38  
39  
40  
41  
42  
43  
44  
45  
46  
47

| Section and Topic                              | Item # | Checklist item                                                                                                                                                                                                                                                                       | Location where item is reported |
|------------------------------------------------|--------|--------------------------------------------------------------------------------------------------------------------------------------------------------------------------------------------------------------------------------------------------------------------------------------|---------------------------------|
| <b>RESULTS</b>                                 |        |                                                                                                                                                                                                                                                                                      |                                 |
| Study selection                                | 16a    | Describe the results of the search and selection process, from the number of records identified in the search to the number of studies included in the review, ideally using a flow diagram.                                                                                         | Figure 1                        |
|                                                | 16b    | Cite studies that might appear to meet the inclusion criteria, but which were excluded, and explain why they were excluded.                                                                                                                                                          | Page 6                          |
| Study characteristics                          | 17     | Cite each included study and present its characteristics.                                                                                                                                                                                                                            | Table 1                         |
| Risk of bias in studies                        | 18     | Present assessments of risk of bias for each included study.                                                                                                                                                                                                                         | Page 7                          |
| Results of individual studies                  | 19     | For all outcomes, present, for each study: (a) summary statistics for each group (where appropriate) and (b) an effect estimate and its precision (e.g. confidence/credible interval), ideally using structured tables or plots.                                                     | Table 2                         |
| Results of syntheses                           | 20a    | For each synthesis, briefly summarise the characteristics and risk of bias among contributing studies.                                                                                                                                                                               | Page 6                          |
|                                                | 20b    | Present results of all statistical syntheses conducted. If meta-analysis was done, present for each the summary estimate and its precision (e.g. confidence/credible interval) and measures of statistical heterogeneity. If comparing groups, describe the direction of the effect. | Page 6                          |
|                                                | 20c    | Present results of all investigations of possible causes of heterogeneity among study results.                                                                                                                                                                                       | Page 6                          |
|                                                | 20d    | Present results of all sensitivity analyses conducted to assess the robustness of the synthesized results.                                                                                                                                                                           | Page 7                          |
| Reporting biases                               | 21     | Present assessments of risk of bias due to missing results (arising from reporting biases) for each synthesis assessed.                                                                                                                                                              | Page 7                          |
| Certainty of evidence                          | 22     | Present assessments of certainty (or confidence) in the body of evidence for each outcome assessed.                                                                                                                                                                                  | Page 6                          |
| <b>DISCUSSION</b>                              |        |                                                                                                                                                                                                                                                                                      |                                 |
| Discussion                                     | 23a    | Provide a general interpretation of the results in the context of other evidence.                                                                                                                                                                                                    | Page 7                          |
|                                                | 23b    | Discuss any limitations of the evidence included in the review.                                                                                                                                                                                                                      | Page 8-9                        |
|                                                | 23c    | Discuss any limitations of the review processes used.                                                                                                                                                                                                                                | Page 8-9                        |
|                                                | 23d    | Discuss implications of the results for practice, policy, and future research.                                                                                                                                                                                                       | Page 7-8                        |
| <b>OTHER INFORMATION</b>                       |        |                                                                                                                                                                                                                                                                                      |                                 |
| Registration and protocol                      | 24a    | Provide registration information for the review, including register name and registration number, or state that the review was not registered.                                                                                                                                       |                                 |
|                                                | 24b    | Indicate where the review protocol can be accessed, or state that a protocol was not prepared.                                                                                                                                                                                       |                                 |
|                                                | 24c    | Describe and explain any amendments to information provided at registration or in the protocol.                                                                                                                                                                                      |                                 |
| Support                                        | 25     | Describe sources of financial or non-financial support for the review, and the role of the funders or sponsors in the review.                                                                                                                                                        |                                 |
| Competing interests                            | 26     | Declare any competing interests of review authors.                                                                                                                                                                                                                                   |                                 |
| Availability of data, code and other materials | 27     | Report which of the following are publicly available and where they can be found: template data collection forms; data extracted from included studies; data used for all analyses; analytic code; any other materials used in the review.                                           |                                 |

From: Page MJ, McKenzie JE, Bossuyt PM, Boutron I, Hoffmann TC, Mulrow CD, et al. The PRISMA 2020 statement: an updated guideline for reporting systematic reviews. *BMJ* 2021;372:n71. doi: 10.1136/bmj.n71

For peer review only - <http://bmjopen.bmj.com/site/about/guidelines.xhtml>  
For more information, visit: <http://www.prisma-statement.org/>

# BMJ Open

## Contemporary sex differences in mortality among patients with ST-segment elevation myocardial infarction: a systematic review and meta-analysis

|                                 |                                                                                                                                                                                                                                                                                                                                                                                                                                                                                                                                                                                                 |
|---------------------------------|-------------------------------------------------------------------------------------------------------------------------------------------------------------------------------------------------------------------------------------------------------------------------------------------------------------------------------------------------------------------------------------------------------------------------------------------------------------------------------------------------------------------------------------------------------------------------------------------------|
| Journal:                        | <i>BMJ Open</i>                                                                                                                                                                                                                                                                                                                                                                                                                                                                                                                                                                                 |
| Manuscript ID                   | bmjopen-2021-053379.R2                                                                                                                                                                                                                                                                                                                                                                                                                                                                                                                                                                          |
| Article Type:                   | Original research                                                                                                                                                                                                                                                                                                                                                                                                                                                                                                                                                                               |
| Date Submitted by the Author:   | 29-Nov-2021                                                                                                                                                                                                                                                                                                                                                                                                                                                                                                                                                                                     |
| Complete List of Authors:       | Xi, Ziwei; Fuwai Hospital State Key Laboratory of Cardiovascular Disease<br>Qiu, Hong; Fuwai Hospital State Key Laboratory of Cardiovascular Disease<br>Guo, Tingting; Fuwai Hospital State Key Laboratory of Cardiovascular Disease<br>Wang, Yong; Fuwai Hospital State Key Laboratory of Cardiovascular Disease<br>Li, Jianan; Beijing Tiantan Hospital<br>Li, Yang; Fuwai Hospital State Key Laboratory of Cardiovascular Disease<br>Zheng, Jianfeng; Fuwai Hospital State Key Laboratory of Cardiovascular Disease<br>Gao, R; Fuwai Hospital State Key Laboratory of Cardiovascular Disease |
| <b>Primary Subject Heading</b>: | Epidemiology                                                                                                                                                                                                                                                                                                                                                                                                                                                                                                                                                                                    |
| Secondary Subject Heading:      | Emergency medicine                                                                                                                                                                                                                                                                                                                                                                                                                                                                                                                                                                              |
| Keywords:                       | EPIDEMIOLOGY, Coronary heart disease < CARDIOLOGY, Myocardial infarction < CARDIOLOGY                                                                                                                                                                                                                                                                                                                                                                                                                                                                                                           |
|                                 |                                                                                                                                                                                                                                                                                                                                                                                                                                                                                                                                                                                                 |

SCHOLARONE™  
Manuscripts

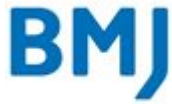

I, the Submitting Author has the right to grant and does grant on behalf of all authors of the Work (as defined in the below author licence), an exclusive licence and/or a non-exclusive licence for contributions from authors who are: i) UK Crown employees; ii) where BMJ has agreed a CC-BY licence shall apply, and/or iii) in accordance with the terms applicable for US Federal Government officers or employees acting as part of their official duties; on a worldwide, perpetual, irrevocable, royalty-free basis to BMJ Publishing Group Ltd ("BMJ") its licensees and where the relevant Journal is co-owned by BMJ to the co-owners of the Journal, to publish the Work in this journal and any other BMJ products and to exploit all rights, as set out in our [licence](#).

The Submitting Author accepts and understands that any supply made under these terms is made by BMJ to the Submitting Author unless you are acting as an employee on behalf of your employer or a postgraduate student of an affiliated institution which is paying any applicable article publishing charge ("APC") for Open Access articles. Where the Submitting Author wishes to make the Work available on an Open Access basis (and intends to pay the relevant APC), the terms of reuse of such Open Access shall be governed by a Creative Commons licence – details of these licences and which [Creative Commons](#) licence will apply to this Work are set out in our licence referred to above.

Other than as permitted in any relevant BMJ Author's Self Archiving Policies, I confirm this Work has not been accepted for publication elsewhere, is not being considered for publication elsewhere and does not duplicate material already published. I confirm all authors consent to publication of this Work and authorise the granting of this licence.

1  
2  
3  
4 **Contemporary sex differences in mortality among patients with ST-segment elevation**  
5  
6 **myocardial infarction: a systematic review and meta-analysis**  
7

8  
9 **Short title : Sex differences in STEMI**  
10

11 **Authors:**

12 Ziwei Xi<sup>1</sup>, Hong Qiu<sup>1</sup>, Tingting Guo<sup>2</sup>, Yong Wang<sup>1</sup>, Jianan Li<sup>3,1</sup>, Yang Li<sup>1</sup>, Jianfeng Zheng<sup>1</sup>,  
13  
14  
15  
16  
17 Runlin Gao<sup>1</sup>

18  
19 *1. Department of Cardiology, Coronary artery disease center, Fuwai Hospital, National*  
20  
21  
22 *Center for Cardiovascular Diseases, Chinese Academy of Medical Sciences and Peking*  
23  
24 *Union Medical College, Beijing, China*

25  
26  
27 *2. Thrombosis Center, National Center for Cardiovascular Diseases, State Key*  
28  
29  
30 *Laboratory of Cardiovascular Disease, Fuwai Hospital, Chinese Academy of Medical*  
31  
32 *Sciences and Peking Union Medical College, Beijing, China*

33  
34  
35 *3. Department of Cardiology and Macrovascular Disease, Beijing Tiantan Hospital,*  
36  
37 *Capital Medical University, Beijing, China*  
38  
39

40  
41  
42  
43 **Corresponding author:**

44 Prof. Hong Qiu, M.D.

45  
46 E-mail address: qiu hong6780@sina.com  
47

48  
49  
50 Department and affiliation: Department of Cardiology, Coronary artery disease center,  
51  
52  
53 Fuwai Hospital, National Center for Cardiovascular Diseases, Chinese Academy of  
54  
55  
56 Medical Sciences and Peking Union Medical College, Beijing, China  
57

58 Telephone: 0016-13261179000  
59  
60



1  
2  
3  
4  
5  
6  
7  
8  
9  
10  
11  
12  
13  
14  
15  
16  
17  
18  
19  
20  
21  
22  
23  
24  
25  
26  
27  
28  
29  
30  
31  
32  
33  
34  
35  
36  
37  
38  
39  
40  
41  
42  
43  
44  
45  
46  
47  
48  
49  
50  
51  
52  
53  
54  
55  
56  
57  
58  
59  
60

Address: No.167 North Lishi Road, Xicheng District, Beijing, China

For peer review only

1  
2  
3  
4 **Contemporary sex differences in mortality among patients with ST-segment elevation**  
5  
6 **myocardial infarction: a systematic review and meta-analysis**  
7  
8  
9

10  
11  
12 **Objectives:** To assess the effect of sex differences on short- and long-term mortality among  
13  
14 patients with ST-segment elevation myocardial infarction (STEMI).  
15  
16

17  
18  
19 **Design:** Systematic review and meta-analysis of contemporary available evidence.  
20  
21  
22

23  
24  
25 **Setting:** PubMed, Embase and Cochrane Library were searched for relevant studies  
26  
27 reporting sex specific outcomes among patients with STEMI published between January  
28  
29 1, 2010 to August 1, 2020. Risk ratio (RR) 95% 95% confidence intervals (CIs) were  
30  
31 measured using DerSimonian and Laird random-effects model. Sensitivity analyses were  
32  
33 performed and publication bias was also checked. All statistical analyses were performed  
34  
35 using STATA version 15.0.  
36  
37  
38  
39

40  
41  
42  
43 **Participants:** Studies providing data about short- or long-term mortality stratified by sex in  
44  
45 patients with STEMI were included. Only study conducted in last ten years were included.  
46  
47  
48  
49

50  
51 **Primary and secondary outcome measures:** The primary outcome was all-cause death at  
52  
53 short-(in-hospital or 30 days) and long-term (at least 12 months) follow-up.  
54  
55  
56

57  
58 **Results**  
59  
60

1  
2  
3  
4 A total of fifteen studies involving 128,585 patients (31,706 [24.7%] female and 96,879  
5  
6 [75.3%] male) were included. In the unadjusted analyses, female were at a higher risk of  
7  
8 short-term mortality (RR, 1.73; 95%CI, 1.53-1.96,  $P<0.001$ ,  $I^2=77\%$ ) but not long-term  
9  
10 mortality (RR, 1.23; 95%CI, 0.89-1.69,  $P=0.206$ ,  $I^2=77.5\%$ ). When adjusted effect  
11  
12 estimates from individual studies were used in meta-analysis, the association between  
13  
14 female and higher risk of short-term mortality remained significant (RR, 1.24; 95%CI, 1.11-  
15  
16 1.38,  $P<0.001$ ,  $I^2=39.6\%$ ). And adjusted long-term mortality was also similar between  
17  
18 female and male (RR, 1.11; 95%CI, 0.42-1.80,  $P=0.670$ ,  $I^2=74.5\%$ ).  
19  
20  
21  
22  
23  
24  
25  
26  
27

## 28 **Conclusions**

29  
30 An increased short- but not long-term mortality was found in female with STEMI. After  
31  
32 adjustment for baseline cardiovascular risk factors and clinical profiles, short-term mortality  
33  
34 remains higher in female with STEMI compared to male, indicating the need for further  
35  
36 improvements in management in female patients.  
37  
38  
39  
40  
41  
42  
43  
44  
45  
46  
47  
48  
49  
50  
51  
52  
53  
54  
55  
56  
57  
58  
59  
60

#### Strengths and limitations of this study

- ♦ We assessed the contemporary effect of sex differences on mortality among patients with STEMI by meta-analysis of studies from the last decade.
- ♦ A greater number of potentially eligible articles were screened and the large sample size ensures adequate statistical power to detect even a small effect of interest.
- ♦ Sensitivity analyses by excluding one study at a time and restricting to studies with high quality or with large sample size got consistent results.
- ♦ Substantial and nonnegligible heterogeneity still exist in our meta-analysis and might result in potential bias.
- ♦ Residual confounding bias could not be totally excluded due to the observational study design of most included studies.

# Contemporary sex differences in short- and long-term mortality among patients with ST-segment elevation myocardial infarction: a systematic review and meta-analysis

## Introduction

Acute myocardial infarction remains one of leading causes of mortality in both men and women worldwide despite improvement of acute cardiac care.<sup>1</sup> Numerous studies have reported that women have a higher risk of in-hospital and long-term adverse outcomes following ST-segment elevation myocardial infarction (STEMI) compared with men.<sup>2</sup> Confounders including advanced age and more frequent comorbidities, such as hypertension and diabetes mellitus<sup>3 4</sup>, might contribute to excess mortality in women. Moreover, previous studies show lower rates of guideline directed medical therapy and revascularization are also associated with poorer prognosis for women with STEMI.<sup>5</sup>

Sex discrepancies in management and outcomes after STEMI have been increasingly reported in the literature and raised public awareness.<sup>6</sup> Major progress in therapy for myocardial infarction and primary and secondary preventive interventions has been made to reduce cardiovascular mortality for women.<sup>1 7</sup> And there have been marked reductions in cardiovascular disease mortality in women with acute myocardial infarction in the past two decades.<sup>1</sup> Conflicting results are noted in recent studies on sex differences following STEMI. It is unclear whether the sex differences still exist, in view of substantial improvements in prognosis of cardiovascular disease over the past decade.

In order to assess the contemporary effect of sex differences on short- and long-term

1  
2  
3  
4 mortality among patients with STEMI, we performed a systematic review and meta-  
5  
6  
7 analysis of all available evidence from last decade reporting sex-specific outcomes after  
8  
9 STEMI.  
10

## 11 12 13 14 **Methods**

15  
16  
17  
18  
19 The present systematic review and meta-analysis was performed following the principle  
20  
21 of the Preferred Reporting Items for Systematic Reviews and Meta-Analyses (PRISMA)  
22  
23 statement.<sup>8</sup>  
24  
25  
26  
27  
28  
29

### 30 *Literature search*

31  
32 We conducted a comprehensive search of the PubMed, EMBASE, and Cochrane Library  
33  
34 from January 1, 2010 to August 1, 2020 to identify studies from the last decade that  
35  
36 described sex differences in in short- or long-term mortality among patients with STEMI.  
37  
38 Both observational studies and randomized clinical trials were eligible. We queried MeSH  
39  
40 and the abstract text for the following three search terms: gender part (including "gender",  
41  
42 "female", "male", "gender differences", "sex differences" or "sex characteristics"); outcome  
43  
44 part (including "death", "mortality", "hospital mortality", "cardiac death", "sudden cardiac  
45  
46 death", "all-cause mortality", "long term mortality", "one year mortality", "cardiovascular  
47  
48 mortality" or "short term mortality"); myocardial infarction part (including "myocardial  
49  
50 infarction", "acute myocardial infarction", "myocardial necrosis", "ST segment elevation  
51  
52 myocardial infarction", "primary PCI", "primary percutaneous coronary intervention" or  
53  
54  
55  
56  
57  
58  
59  
60

1  
2  
3  
4 "primary angioplasty") to identify relevant studies. There was no language restriction or  
5  
6 age limit.  
7  
8  
9

### 10 11 *Study selection*

12  
13  
14 According to the aim of our analyses, studies were included in this systematic review if  
15  
16 data about short- (in-hospital or 30 days) or long-term (at least 12 months) mortality  
17  
18 stratified by sex in patients with STEMI were reported. Two reviewers identified studies  
19  
20 eligible for further review by performing an initial screen of titles or abstracts of the search  
21  
22 results. Subsequently, a second screen of full texts eligibility was performed by another  
23  
24 two reviewers. Studies had to fulfil the following criteria to be included in the present  
25  
26 analyses: i) studies reporting data on all-cause mortality specific to STEMI population; and  
27  
28 ii) studies providing enough details to obtain numbers of events or incidence rates  
29  
30 according to sex; and iii) enrollment starting earlier than a decade ago. Editorials, letters,  
31  
32 conference proceedings and abstracts were considered to be eligible only if sufficient  
33  
34 information was available in abstracts or associated tables or figures. We excluded studies  
35  
36 if they were review articles or case reports, or if they involved pregnant participants,  
37  
38 critically ill patients, or provided insufficient data to allow for risk estimates to be calculated.  
39  
40  
41  
42  
43  
44  
45  
46  
47  
48 Any disagreement was reviewed by a third reviewer and resolved by consensus.  
49  
50  
51  
52

### 53 *Data extraction*

54  
55  
56 Detailed data from selected studies were extracted independently by two reviewers using  
57  
58 a standardized form independently. Data about study and participants characteristics,  
59  
60

1  
2  
3  
4 including year of study, sample size, time of enrollment, geographical location, endpoints  
5  
6 of study, and follow-up duration, were collected. Any discrepancies were reviewed by a  
7  
8 third reviewer and resolved by consensus. The quality of included studies was evaluated  
9  
10 by Newcastle-Ottawa scale using prespecified items comprised of patients' selection  
11  
12 (representativeness and selection of patients, ascertainment of exposure), comparability  
13  
14 of cohorts based on design or analysis, and outcome (assessment of outcomes, adequacy  
15  
16 of follow-up).<sup>9</sup> A quality score (0–9 points) was generated according to a maximum of 1  
17  
18 point for each item.  
19  
20  
21  
22  
23  
24  
25  
26  
27

#### 28 *Patient and public involvement*

29  
30 Due to the nature of the systematic review and meta-analysis, this study did not involve  
31  
32 patients and the public in the design, or conduct, or reporting or dissemination plans.  
33  
34  
35  
36  
37

#### 38 *Statistical analysis*

39  
40 The risk ratios (RRs) and 95% confidence interval (CI) were primarily used to represent  
41  
42 the effect of sex differences on mortality after STEMI. And data were combined using  
43  
44 random-effects model of DerSimonian and Laird with inverse variance weighting. Random-  
45  
46 effect model was used due to substantial clinical and statistical heterogeneity. Following  
47  
48 analyses were performed: i) unadjusted RRs for short- and long-term all-cause mortality  
49  
50 using raw number of death and total participants at risk for death specific to each sex, ii)  
51  
52 adjusted RRs for short- and long-term all-cause mortality using adjusted RRs if they were  
53  
54 described in those included studies. In terms of short-term mortality, the RRs for in-hospital  
55  
56  
57  
58  
59  
60



1  
2  
3  
4 and 30-day mortality were also calculated respectively.  
5

6 We assess heterogeneity across studies with Cochran's Q test and I<sup>2</sup> test, with P<0.1 or  
7  
8 I<sup>2</sup> >50% considered significant. We also performed meta-regression to identify the  
9  
10 potential sources of heterogeneity in the included studies. The potential sources were  
11  
12 differences in diabetes, hypertension, hyperlipidemia, smoking, prior MI, and prior PCI.  
13  
14 Furthermore, stratified analysis was conducted as well by dividing the included studies into  
15  
16 different subgroups based on the Newcastle-Ottawa scale scores (>7 points or ≤7 points)  
17  
18 to assess the potential sources of heterogeneity. To assess the potential effect of  
19  
20 publication bias, we inspected funnel plots for asymmetry and used the Egger's regression  
21  
22 asymmetry test in which P<0.05 was considered to indicate significant publication bias.  
23  
24 Sensitivity analyses was conducted by excluding one study at a time and comparing the  
25  
26 results with the complete one. In addition, we also performed sensitivity analyses by  
27  
28 restricting to high-quality studies with a Newcastle-Ottawa scale of 5 points or more and  
29  
30 restricting to studies with sample size bigger than 1000 participants. All statistical analyses  
31  
32 were performed using STATA version 15.0 (Stata Corp, College Station, TX). Differences  
33  
34 were considered statistically significant at P < .05 (2-sided).  
35  
36  
37  
38  
39  
40  
41  
42  
43  
44  
45  
46  
47

## 48 **Results**

### 49 *Literature search*

50  
51  
52  
53  
54  
55  
56 Study selection details were outlined in Figure 1. The literature search identified 2,611  
57  
58 potentially relevant articles. After screening based on title and abstract review, 2495  
59  
60

1  
2  
3  
4 records were excluded. A total of 116 full-text were finally assessed for eligibility, with 96  
5  
6 papers excluded due to enrollment starting earlier than a decade ago or no sufficient  
7  
8 gender specific data to analyze. Another 5 papers reviewed in detail were excluded after  
9  
10 due to data from the same cohorts. A total of 15 studies were finally included in the present  
11  
12 systematic review and meta-analysis.<sup>10-24</sup>  
13  
14  
15  
16  
17  
18

### 19 *Study characteristics*

20  
21  
22 Of the 15 included studies, 8 were multicenter studies and 4 studies enrolled more than  
23  
24 10,000 patients with STEMI. See Table 1 for further information of included studies.  
25  
26 Baseline characteristics of participants were missing in some included studies, but all  
27  
28 included studies provided sufficient data for analysis of sex differences in clinical outcomes.  
29  
30 Except for 1 study, which was a prespecified gender analysis of randomized controlled  
31  
32 trial, the remaining 14 were observational studies. Among the 10 included studies which  
33  
34 reported adjusted analyses, most studied adjusted for age, diabetes mellitus, hypertension,  
35  
36 and prior myocardial infarction/PCI, while some adjusted for renal insufficiency,  
37  
38 cardiogenic shock, cardiac arrest at admission and occurrence time of symptom onset.  
39  
40 Variables that were adjusted in the adjusted analyses from the included studies were  
41  
42 presented in eTable 1 of the Supplementary Material. Results of assessment of study  
43  
44 quality using Newcastle-Ottawa scale were shown in eTable 2 in the Supplementary  
45  
46 Material.  
47  
48  
49  
50  
51  
52  
53  
54  
55  
56  
57  
58  
59  
60

### *Patient characteristics*

1  
2  
3  
4 A total of 128,585 patients with STEMI (31,706 [24.7%] female and 96,879 [75.3%] male)  
5  
6 were involved in the 15 included studies. Female tended to be older and had higher  
7  
8 prevalence of diabetes mellitus in all included studies. And in most studies, other important  
9  
10 comorbidities, including hypertension and hyperlipidemia, were more frequent in female.  
11  
12 Greater proportions of male were smokers and had prior PCI or myocardial infarction.  
13  
14 Besides, some studies reported that door-to-balloon time and symptom onset to balloon  
15  
16 time were longer in female than male. Part of patient baseline characteristics were  
17  
18 summarized in Table 2.  
19  
20  
21  
22  
23  
24  
25  
26  
27

#### 28 *Short-term all-cause mortality*

29  
30 Thirteen studies reported sex-specific unadjusted short-term mortality (7 studies with 30-  
31  
32 day mortality and 6 studies with in-hospital mortality) of patients with STEMI. There were  
33  
34 2,873 of 31,409 (9.1%) cases of all-cause mortality in female compared with 4,380 of  
35  
36 95,610 (4.6%) in male. Female were at a significantly higher risk of short-term mortality  
37  
38 (RR, 1.73; 95%CI, 1.53-1.96,  $P<0.001$ ,  $I^2=77\%$ ) compared with male (Figure 2 A). Nine  
39  
40 studies involving 119,379 patients reported adjusted short-term mortality specific to sex. In  
41  
42 adjusted analysis, the association between female and higher risk of short-term mortality  
43  
44 remained significant (RR, 1.24; 95%CI, 1.11-1.38,  $P<0.001$ ,  $I^2=39.6\%$ ) (Figure 2 B).  
45  
46 However, the strength of association calculated with adjusted RRs from these 9 studies  
47  
48 was attenuated.  
49  
50  
51  
52  
53

54  
55 Subgroup analysis demonstrated that the results of studies with Newcastle-Ottawa  
56  
57 scale  $>7$  points (RR, 1.90; 95%CI, 1.73-2.09,  $P=0.018$ ,  $I^2=63.4\%$ ) and studies with  $\leq 7$   
58  
59  
60

1  
2  
3  
4 points (RR, 1.52; 95%CI, 1.20-1.93, P=0.026, I<sup>2</sup>=58.1%) were consistent in unadjusted  
5  
6 short-term mortality (See eFigure 1 in the Supplementary Material). The impact of sex on  
7  
8 in-hospital (RR, 1.71; 95%CI, 1.27-2.31, P<.001, I<sup>2</sup>=86.4%) and 30-day mortality (RR, 1.81;  
9  
10 95%CI, 1.62-2.02, P<.001, I<sup>2</sup>=56.6%) were consistent. The meta-analysis performed in  
11  
12 studies of patients undergoing PCI for STEMI also showed increased unadjusted mortality  
13  
14 (RR, 1.45; 95%CI, 1.05-2.00, P=0.026, I<sup>2</sup>=39.5%) in female patients.  
15  
16  
17  
18  
19  
20  
21

### 22 *Long-term all-cause mortality*

23  
24 Six studies involved 18,018 patients with STEMI (4,191 female and 13,827 male) and  
25  
26 followed up for more than 1 year, and reported all-cause mortality for female and male.  
27  
28 The incidence of long-term all-cause mortality was 13.9% (n=584) in female and 8.7%  
29  
30 (n=1202) in male. In unadjusted analysis, no significant sex difference was found in long-  
31  
32 term mortality (RR, 1.23; 95%CI, 0.89-1.69, P=0.206, I<sup>2</sup>=77.5%) (Figure 3 A). The  
33  
34 unadjusted long-term mortality was also similar between female and male patients  
35  
36 undergoing PCI (RR, 1.28; 95%CI, 0.95-1.73, P=0.108, I<sup>2</sup>=0.0%). And the adjusted  
37  
38 analysis of the pooled results from four studies, also showed a similar risk of mortality at  
39  
40 long-term follow-up in female compared with male (RR, 1.11; 95%CI, 0.42-1.80, P=0.670,  
41  
42 I<sup>2</sup>=74.5%) (Figure 3 B).  
43  
44  
45  
46  
47  
48  
49  
50  
51  
52

### 53 *Meta-Regression Analysis, sensitivity analyses and publication bias*

54  
55 According to meta-regression analysis, differences in prevalence of diabetes ( $\beta$  coefficient,  
56  
57 0.248; P=0.337; adjusted R<sup>2</sup>=1.31%; I<sup>2</sup>=80.86%;  $\tau^2$ =0.044), hypertension ( $\beta$  coefficient, -  
58  
59  
60

1  
2  
3  
4 0.255; P=0.538; adjusted R<sup>2</sup>=24.22%; I<sup>2</sup>=41.04%; τ<sup>2</sup>=0.008), hyperlipidemia(β coefficient,  
5  
6 0.260; P=0.415; adjusted R<sup>2</sup>=-1.84%; I<sup>2</sup>=83.59%; τ<sup>2</sup>=0.050), smoking ( β coefficient, -  
7  
8 0.040; P=0.255; adjusted R<sup>2</sup>=17.86%; I<sup>2</sup>=79.41%; τ<sup>2</sup>=0.045), prior MI ( β coefficient, -  
9  
10 2.725; P=0.126; adjusted R<sup>2</sup>=60.30%; I<sup>2</sup>=60.19%; τ<sup>2</sup>=0.032), and prior PCI (β coefficient,  
11  
12 0.109; P=0.896; adjusted R<sup>2</sup>=-58.31%; I<sup>2</sup>=61.73%; τ<sup>2</sup>=0.042) between sexes were not  
13  
14 identified as significant sources of heterogeneity for short-term all-cause mortality. Given  
15  
16 that not all included study provided information on confounders stratified by sex, the results  
17  
18 of meta-regression analyses should be interpreted with caution.  
19  
20  
21  
22  
23

24  
25 Sensitivity analysis by excluding one study at a time (See eFigure 2 in the Supplementary  
26  
27 Material) or restricted to data from studies with sample size bigger than 1000 (RR, 1.75;  
28  
29 95%CI, 1.54-1.99, P<.001, I<sup>2</sup>=82.9%) both indicated that none of the studies affected the  
30  
31 results of short-term mortality in this meta-analysis significantly. In analysis for long-term  
32  
33 mortality, sensitivity analysis showed a possibly higher influence on the result attribute to  
34  
35 the study of Tai et al (See eFigure 3 in the Supplementary Material). After removing this  
36  
37 study from meta-analysis, the association of female with increased long-term mortality  
38  
39 became significant (RR, 1.50; 95%CI, 1.23-1.83, P<.001, I<sup>2</sup>=40.9%). We found no  
40  
41 evidence of publication bias across studies based on visual inspection of funnel plots (See  
42  
43 eFigure 4 in the Supplementary Material) and the results from Egger's tests for short-term  
44  
45 mortality (P=0.462) and for long-term mortality (P=0.053).  
46  
47  
48  
49  
50  
51  
52  
53  
54  
55

## 56 Discussion:

57  
58  
59  
60

1  
2  
3  
4 Our systematic review and meta-analysis of contemporary literature on sex differences  
5  
6 among patients with STEMI demonstrate that female have a higher risk of short- but not  
7  
8 long-term mortality compared with male with STEMI. Furthermore, after adjustment for  
9  
10 baseline cardiovascular risk factors and clinical profiles, the sex differences in short-term  
11  
12 mortality are attenuated but remain significant, while female have the similar long-term  
13  
14 mortality with male.  
15  
16  
17  
18  
19  
20  
21

22 Our results are somewhat in accordance with several previously published meta-analysis.<sup>2</sup>

23  
24  
25 <sup>25</sup> A considerable number of studies have consistently suggested that women were at a  
26  
27 higher risk of short-term mortality after ACS. However, whether risk of long-term mortality  
28  
29 is also higher in women with ACS remains under debate. Some studies indicated that  
30  
31 women with STEMI had a higher 1-year rate of death compared to men<sup>26</sup>, while the 1-year  
32  
33 mortality rate was conversely lower in women than men in some other studies<sup>23 24</sup>. In our  
34  
35 study, with respect to short-term mortality, the analyses of studies with high or low quality,  
36  
37 and big or small sample size yielded similar results. However, in terms of long-term  
38  
39 mortality, caution is needed when interpreting our finding of non-significant increased long-  
40  
41 term mortality in adjusted analyses, due to the results of sensitivity analysis which showed  
42  
43 a significant association between female and increased long-term mortality after removing  
44  
45 one study from adjusted analyses.  
46  
47  
48  
49  
50  
51  
52  
53  
54  
55

56 It is widely accepted that there are significant differences in outcomes of women and men  
57  
58 with acute myocardial infarction. In our study, after adjusted for participants' baseline  
59  
60

1  
2  
3  
4 cardiovascular risk factors and clinical profiles, the strength of association between gender  
5  
6 and short-term mortality was substantially attenuated, which suggested that poorer  
7  
8 baseline cardiovascular risk profile partially explained the impact of sex differences on  
9  
10 mortality. Multiple studies have shown that women with STEMI present at older age and  
11  
12 have a higher burden of comorbidities, contributing to the sex differences in mortality after  
13  
14 STEMI.<sup>27</sup> All studies included in our meta-analysis demonstrate that female patients are  
15  
16 older and with more diabetes mellitus as well as hypertension. In addition, some sex-  
17  
18 specific studies found that certain risk factors and comorbidities were more potent in  
19  
20 women.<sup>28</sup> Diabetes mellitus, hypertension and smoking status are more strongly  
21  
22 associated with increased risk of cardiac events in women compared with men.<sup>27 29</sup>  
23  
24  
25  
26  
27  
28  
29  
30  
31

32 Notably, that these differences mentioned above still could not completely explain the gap  
33  
34 in mortality between sexes. It has been proved that women with acute myocardial infarction  
35  
36 were less likely to be treated with guideline directed medical therapy and less likely to  
37  
38 receive primary reperfusion therapy including primary percutaneous coronary intervention  
39  
40 or fibrinolysis.<sup>30</sup> Regarding medical therapy, numerous studies conducted around the world  
41  
42 consistently demonstrate female survivors are receiving less optimal medical therapy after  
43  
44 acute myocardial infarction during hospitalization or at discharge.<sup>31 32</sup> Though there might  
45  
46 be no differences in treatment adherence between men and women, some studies report  
47  
48 significant sex disparities in initiation of appropriate pharmacotherapy after myocardial  
49  
50 infarction.<sup>33</sup> Results from these observational studies have shown women are receiving  
51  
52 less optimal medical therapy including aspirin, statins, and angiotensin-converting enzyme  
53  
54  
55  
56  
57  
58  
59  
60

1  
2  
3  
4 inhibitors in all age groups, especially young women, and suggested that clinicians and  
5  
6 patients may benefit from better education and awareness of undertreatment of younger  
7  
8 women.<sup>33 34</sup>  
9  
10

11  
12  
13  
14 Lower rates of revascularization are observed among women with STEMI compared with  
15  
16 men in several studies despite proven benefit of this therapy.<sup>35</sup> Moreover, the sex  
17  
18 differences might be driven by delays in presentation to hospital and women with STEMI  
19  
20 were more likely to experience longer delays than men. Although a great improvement in  
21  
22 emergency medical services and timely revascularization over the past decades, recent  
23  
24 studies show that women with STEMI still present later and have a longer ischemic time  
25  
26 than men. Previous studies have shown consistently that women have longer door-to  
27  
28 balloon times and longer door-to needle times.<sup>36 37</sup> In addition, women are also more likely  
29  
30 to exhibit longer pre-hospital delays in seeking medical care after the development of  
31  
32 symptoms suggestive of myocardial infarction. Although there have been significant  
33  
34 reductions in patient and system delay in the last decade, women continue to have longer  
35  
36 presentation and treatment times.<sup>38</sup> Sex differences also exist in clinical presentation of  
37  
38 STEMI. Although chest pain was the most common ACS symptom in both sexes, women  
39  
40 were more likely to present without chest pain than men.<sup>39 40</sup> Lower rates of typical chest  
41  
42 pain reported among women with STEMI may also influence provider decision-making to  
43  
44 pursue less aggressive care including invasive revascularization.  
45  
46  
47  
48  
49  
50  
51  
52  
53  
54

55  
56  
57  
58 Some included studies of our meta-analysis enrolled STEMI patients in general<sup>14-16</sup>, while  
59  
60



1  
2  
3  
4 some others enrolled patients undergoing PCI for STEMI<sup>11 13 18</sup>. The different prognosis of  
5  
6 patients receiving reperfusion therapy or no-reperfusion therapy might be a potential  
7  
8 source of heterogeneity of our study. Nevertheless, our results are completely consistent  
9  
10 with a previous meta-analysis from Pancholy et al., which investigated sex differences in  
11  
12 mortality among patients with STEMI treated with primary PCI.<sup>2</sup> Its results demonstrated  
13  
14 that, when adjusted RRs were used, the increased risk for 1-year mortality in women was  
15  
16 no longer significant and the risk of in-hospital mortality still significantly elevated. It should  
17  
18 be noted that more than 50% of patients were treated with PCI in the most study conducted  
19  
20 among the general STEMI patients and included by our analysis, even more than 90% in  
21  
22 some included studies.<sup>12 24</sup> The increasing rate of primary PCI in recent years might be a  
23  
24 reason for the consistency of our findings and previous studies conducted specifically  
25  
26 among STEMI patients undergoing PCI  
27  
28  
29  
30  
31  
32  
33  
34  
35  
36  
37

38 Complications including bleeding, heart failure and mechanical complications are more  
39  
40 likely to develop in women with acute myocardial infarction and increase the risk of  
41  
42 mortality.<sup>14 41 42</sup> Bleeding secondary to antithrombotic therapies and invasive procedures is  
43  
44 more frequent in women.<sup>43</sup> Three included studies reported incidence of bleeding following  
45  
46 STEMI and they all found that women were at higher risk of bleeding.<sup>10 13 18</sup> One study  
47  
48 included in our analysis examined the relationships among sex, acute heart failure, and  
49  
50 related outcomes after STEMI.<sup>14</sup> Its results demonstrate that women are at higher risk to  
51  
52 develop de novo heart failure after STEMI and women with de novo heart failure have  
53  
54 worse survival compared with man. However, we could not compare the incidence of these  
55  
56  
57  
58  
59  
60

1  
2  
3  
4 complications due to the lack of sufficient data. Mechanical complications requiring surgical  
5  
6 intervention are also much more common in women after acute myocardial infarction and  
7  
8 associated with high mortality rates.<sup>44</sup>  
9  
10

11  
12  
13  
14 Several limitations of this meta-analysis should be considered. First, the included studies  
15  
16 are all observational studies except one post hoc analysis of randomized controlled trial.  
17  
18 Hence, there may be residual confounding bias inherent in the observational study design  
19  
20 in our meta-analysis. Second, in adjusted analysis, not all included studies adjusted for the  
21  
22 same confounders and not all studies reported adjusted RRs. The confounders which were  
23  
24 adjusted in the included studies might differ greatly across studies. Third, there was  
25  
26 substantial heterogeneity in our meta-analysis, which could partly be attributed to the wide  
27  
28 variability in the sample sizes, locations, and treatment regimens across included studies.  
29  
30 Additionally, although we calculated adjusted RRs for all-cause mortality, it needed to be  
31  
32 noted that relevant confounders might have differed across studies. Fourth, the analysis of  
33  
34 long-term mortality, especially the adjusted analysis, included far fewer studies compared  
35  
36 with analysis of short-term mortality. Hence, there might be significant bias in the results  
37  
38 about long-term mortality.  
39  
40  
41  
42  
43  
44  
45  
46  
47  
48  
49

50  
51 In conclusion, our meta-analysis, pooling data from contemporary literature, shows that  
52  
53 women with STENI have a higher risk of short-term mortality but not long-term mortality.  
54  
55 The effect of sex differences on mortality in patients with STEMI remain significant after  
56  
57 adjustment for baseline cardiovascular risk factors and clinical profiles, suggesting that  
58  
59  
60

1  
2  
3  
4 public awareness of increased risk and further improvements in management in women  
5  
6 with STEMI are necessary.  
7  
8  
9  
10

#### 11 **Other Information:**

#### 12 **Contribution statement**

13  
14  
15  
16  
17  
18  
19 Ziwei Xi: Study concepts, Study design, Literature research, Statistical analysis,  
20  
21 Manuscript preparation, Manuscript editing. Tingting Guo and Yong Wang: Data  
22  
23 acquisition, Data analysis/interpretation. Jianan Li, Yang Li, Jianfeng Zheng and Runlin  
24  
25 Gao: Manuscript revision/review. Hong Qiu: Manuscript final version approval.  
26  
27  
28  
29  
30  
31

#### 32 **Conflict of interest**

33  
34  
35 The authors declare that there is no conflict of interest.  
36  
37  
38  
39

#### 40 **Funding**

41  
42  
43 This research received no specific grant from any funding agency in the public, commercial,  
44  
45 or not-for-profit sectors.  
46  
47  
48  
49

#### 50 **Ethics approval**

51  
52  
53 The institutional central committee at Fuwai Hospital approved that the study protocol and  
54  
55 inform consent was not required for a systematic review and meta-analysis.  
56  
57  
58  
59  
60

1  
2  
3  
4 **Data sharing statement**  
5

6 As this is a systematic review and meta-analysis, the data used in the study have already  
7  
8  
9 been published by the authors of the included studies. All data relevant to the study are  
10  
11 included in the article or uploaded as supplementary information.  
12  
13  
14  
15  
16  
17  
18  
19  
20  
21  
22  
23  
24  
25  
26  
27  
28  
29  
30  
31  
32  
33  
34  
35  
36  
37  
38  
39  
40  
41  
42  
43  
44  
45  
46  
47  
48  
49  
50  
51  
52  
53  
54  
55  
56  
57  
58  
59  
60

For peer review only

Table 1 Characteristics of included studies.

| First Author      | Year | Region       | Study design | Data source             | Multicenter | Time of enrollment      | Number of STEMI patients | Female          | Endpoint                                                          | Follow-up  |
|-------------------|------|--------------|--------------|-------------------------|-------------|-------------------------|--------------------------|-----------------|-------------------------------------------------------------------|------------|
| <b>Venetsanos</b> | 2017 | 13 countries | Prospective  | Clinical registry       | Yes         | Sep, 2011-<br>Oct, 2013 | 1,862                    | 369<br>(20.0)   | Major adverse cardiovascular events and definite stent thrombosis | 30 d       |
| <b>Ali</b>        | 2018 | Germany      | Prospective  | Administrative database | No          | 2013-2017               | 312                      | 101<br>(32.4)   | All-cause in-hospital mortality                                   | NA         |
| <b>Langabeer</b>  | 2018 | US           | Prospective  | Clinical registry       | Yes         | Jan, 2010-<br>Dec, 2015 | 9,674                    | 2,569<br>(26.6) | In-hospital mortality                                             | NA         |
| <b>Tang</b>       | 2018 | China        | Prospective  | Administrative database | No          | Jan, 2013-<br>Dec, 2013 | 1,238                    | 210 (1.9)       | Major adverse cardiac and cerebrovascular events                  | 730 ± 30 d |

|    |                  |      |           |               |               |     |             |        |           |                          |         |
|----|------------------|------|-----------|---------------|---------------|-----|-------------|--------|-----------|--------------------------|---------|
| 1  | <b>Cenko</b>     | 2019 | 12        | Prospective   | Clinical      | Yes | Jan, 2010-  | 10,443 | 3,112     | 30-day all-cause         | 30 d    |
| 2  |                  |      | Europea   |               | registry      |     | Jul, 2018   |        | (29.8)    | mortality                |         |
| 3  |                  |      | n         |               |               |     |             |        |           |                          |         |
| 4  |                  |      | countries |               |               |     |             |        |           |                          |         |
| 5  |                  |      |           |               |               |     |             |        |           |                          |         |
| 6  |                  |      |           |               |               |     |             |        |           |                          |         |
| 7  |                  |      |           |               |               |     |             |        |           |                          |         |
| 8  |                  |      |           |               |               |     |             |        |           |                          |         |
| 9  |                  |      |           |               |               |     |             |        |           |                          |         |
| 10 |                  |      |           |               |               |     |             |        |           |                          |         |
| 11 | <b>Hao</b>       | 2019 | China     | Prospective   | Clinical      | Yes | Nov, 2014-  | 50,203 | 11,016    | In-hospital mortality    | NA      |
| 12 |                  |      |           |               | registry      |     | Jun, 2018   |        | (21,9)    |                          |         |
| 13 |                  |      |           |               |               |     |             |        |           |                          |         |
| 14 |                  |      |           |               |               |     |             |        |           |                          |         |
| 15 |                  |      |           |               |               |     |             |        |           |                          |         |
| 16 |                  |      |           |               |               |     |             |        |           |                          |         |
| 17 | <b>Hannan</b>    | 2019 | US        | Retrospective | Administrativ | Yes | Jan, 2013-  | 23,809 | 7,791     | In hospital/30-day       | 30 d    |
| 18 |                  |      |           |               | e database    |     | Dec, 2015   |        | (32.7)    | mortality                |         |
| 19 |                  |      |           |               |               |     |             |        |           |                          |         |
| 20 |                  |      |           |               |               |     |             |        |           |                          |         |
| 21 |                  |      |           |               |               |     |             |        |           |                          |         |
| 22 | <b>Maznyczka</b> | 2019 | UK        | Retrospective | Clinical      | No  | July, 2011- | 324    | 87 (26.9) | All-cause death/ first   | 5 years |
| 23 |                  |      |           |               | registry      |     | Nov, 2012   |        |           | heart failure            |         |
| 24 |                  |      |           |               |               |     |             |        |           | hospitalization          |         |
| 25 |                  |      |           |               |               |     |             |        |           |                          |         |
| 26 |                  |      |           |               |               |     |             |        |           |                          |         |
| 27 |                  |      |           |               |               |     |             |        |           |                          |         |
| 28 |                  |      |           |               |               |     |             |        |           |                          |         |
| 29 |                  |      |           |               |               |     |             |        |           |                          |         |
| 30 | <b>Stehli</b>    | 2019 | Australia | Prospective   | Clinical      | Yes | 2013-2016   | 6,431  | 1,317     | In hospital/30-day major | 30 d    |
| 31 |                  |      |           |               | registry      |     |             |        | (20.5)    | adverse events, and      |         |
| 32 |                  |      |           |               |               |     |             |        |           | major bleeding           |         |
| 33 |                  |      |           |               |               |     |             |        |           |                          |         |
| 34 |                  |      |           |               |               |     |             |        |           |                          |         |
| 35 |                  |      |           |               |               |     |             |        |           |                          |         |
| 36 |                  |      |           |               |               |     |             |        |           |                          |         |
| 37 |                  |      |           |               |               |     |             |        |           |                          |         |
| 38 | <b>Burgess</b>   | 2020 | Australia | Prospective   | Administrativ | No  | Dec, 2010-  | 589    | 123 (21)  | Cardiac death and        | 2 years |
| 39 |                  |      |           |               |               |     |             |        |           |                          |         |
| 40 |                  |      |           |               |               |     |             |        |           |                          |         |
| 41 |                  |      |           |               |               |     |             |        |           |                          |         |
| 42 |                  |      |           |               |               |     |             |        |           |                          |         |
| 43 |                  |      |           |               |               |     |             |        |           |                          |         |
| 44 |                  |      |           |               |               |     |             |        |           |                          |         |
| 45 |                  |      |           |               |               |     |             |        |           |                          |         |
| 46 |                  |      |           |               |               |     |             |        |           |                          |         |

|                 |      |                 |               |                             |     |                         |        |                 |                                      |                    |
|-----------------|------|-----------------|---------------|-----------------------------|-----|-------------------------|--------|-----------------|--------------------------------------|--------------------|
|                 |      |                 |               | e database                  |     | Apr, 2014               |        |                 | myocardial infarction                |                    |
| <b>Dharma</b>   | 2020 | Indonesi<br>a   | Retrospective | Administrativ<br>e database | No  | Feb, 2011-<br>Aug, 2019 | 6,557  | 929<br>(14.2)   | All-cause mortality                  | 30 d and 1<br>year |
| <b>Kerkmanx</b> | 2020 | Netherla<br>nds | Retrospective | Administrativ<br>e database | Yes | 2015-2016               | 787    | 229 (29)        | All-cause mortality                  | 1 year             |
| <b>Siabani</b>  | 2020 | Iran            | Prospective   | Clinical<br>registry        | No  | Jun, 2016-<br>May, 2018 | 1,484  | 311(21)         | In-hospital mortality                | NA                 |
| <b>Tai</b>      | 2020 | China           | Retrospective | Administrativ<br>e database | No  | Jan, 2013-<br>Dec, 2017 | 182    | 56 (30.8)       | In hospital/1-year<br>mortality      | 1 year             |
| <b>Tizón</b>    | 2020 | Spain           | Prospective   | Clinical<br>registry        | Yes | 2010-2016               | 14,690 | 3,486<br>(23.7) | 30-day/1-year all-cause<br>mortality | 1 year             |

Table 2 Baseline characteristics of participants in included studies.

| First | Year | Age, mean (SD), | Diabete | Hypertensio | Hyperlipidemi | Smokin | Prior | Prior |
|-------|------|-----------------|---------|-------------|---------------|--------|-------|-------|
|-------|------|-----------------|---------|-------------|---------------|--------|-------|-------|

| Author     | years | s, n (%)    |             | n, n (%)   |              | a, n (%)     |            | g, n (%)     |              | MI, n (%)  | PCI, n (%)   |            |              |           |            |
|------------|-------|-------------|-------------|------------|--------------|--------------|------------|--------------|--------------|------------|--------------|------------|--------------|-----------|------------|
|            |       | Female      | Male        | Female     | Male         | Female       | Male       | Female       | Male         | Female     | Male         | Female     | Male         |           |            |
| Venetsanos | 2017  | 69 (13.0)   | 59 (11.0)   | 48 (13.0)  | 205 (13.7)   | 190 (51.5)   | 605 (40.5) | 117 (31.7)   | 536 (35.9)   | NA         | NA           | 24 (6.5)   | 135 (9.0)    | 16 (4.3)  | 124 (8.3)  |
| Ali        | 2018  | NA          | NA          | NA         | NA           | NA           | NA         | NA           | NA           | NA         | NA           | NA         | NA           | NA        | NA         |
| Langabeer  | 2018  | 62.5 (13.6) | 60.2 (12.5) | 759 (29.6) | 1,975 (27.8) | NA           | NA         | 1,265 (49.3) | 3,693 (52.0) | 951 (37.0) | 2,763 (38.9) | 435 (16.9) | 1,304 (18.4) | NA        | NA         |
| Tang       | 2018  | 64.5 (9.3)  | 54.4 (10.7) | 66 (31.4)  | 311 (25.1)   | 141 (67.1)   | 659 (53.3) | 125 (59.5)   | 749 (60.3)   | 33 (15.7)  | 957 (77.3)   | 10 (4.8)   | 83 (6.7)     | 60 (28.6) | 282 (22.8) |
| Cenko      | 2019  | 66.1        | 59.7        | 925        | 1,531        | 2,322 (74.6) | 4,502      | 1,353 (43.3) | 3,100        | 1,010      | 3,714        | 301        | 842          | 306       | 762        |



|                 |      |         |           |         |       |           |       |               |       |        |       |         |       |        |       |
|-----------------|------|---------|-----------|---------|-------|-----------|-------|---------------|-------|--------|-------|---------|-------|--------|-------|
|                 |      | (11.7)  | (11.7)    | (29.7)  | (20.9 |           | (61.4 |               | (42.3 | (32.5) | (50.7 | (9.7)   | (11.5 | (9.8)  | (10.4 |
|                 |      | )       | )         | )       | )     | )         | )     | )             | )     | )      | )     | )       | )     | )      | )     |
| <b>Hao</b>      | 2019 | 69.0    | 61.1      | 10,141  | 24,08 | 15,607    | 38,42 | 17,996 (85.4) | 50,94 | 1,719  | 32,37 | NA      | NA    | NA     | NA    |
|                 |      | (10.6)  | (12.4)    | (48.1)  | 2     | (74.1)    | 6     |               | 4     | (8.2)  | 7     |         |       |        |       |
|                 |      |         |           |         | (39.4 |           | (62.9 |               | (83.3 |        | (53.0 |         |       |        |       |
|                 |      |         |           |         | )     |           | )     |               | )     |        | )     |         |       |        |       |
| <b>Hannan</b>   | 2019 | 70.72   | 62.11     | NA      | NA    | NA        | NA    | NA            | NA    | NA     | NA    | NA      | NA    | 868    | 2206  |
|                 |      | (14.73) | (12.82)   |         |       |           |       |               |       |        |       |         |       | (11.1) | (13.8 |
|                 |      |         |           |         |       |           |       |               |       |        |       |         |       | )      | )     |
| <b>Maznyczk</b> | 2019 | 61.2    | 58.6(11.2 | 8 (9.2) | 26    | 32 (36.8) | 73    | 28 (32.2)     | 66    | 57     | 139   | 5 (5.7) | 20    | 2      | 16    |
| <b>a</b>        |      | (12.2)  | )         |         | (11.0 |           | (30.8 |               | (27.8 | (65.5) | (58.6 |         | (8.4) | (2.3)  | (6.8) |
|                 |      |         |           |         | )     |           | )     |               | )     |        | )     |         |       |        |       |
| <b>Stehli</b>   | 2019 | 66.5    | 60.8      | 245     | 770   | NA        | NA    | NA            | NA    | NA     | NA    | NA      | NA    | 104    | 577   |
|                 |      | (13.2)  | (12.2)    | (18.6)  | (15.1 |           |       |               |       |        |       |         |       | (7.9)  | (11.3 |
|                 |      |         |           |         | )     |           |       |               |       |        |       |         |       | )      | )     |

|    |                 |      |         |         |        |       |            |       |            |       |          |       |         |       |        |       |
|----|-----------------|------|---------|---------|--------|-------|------------|-------|------------|-------|----------|-------|---------|-------|--------|-------|
| 1  | <b>Burgess</b>  | 2020 | 62.7    | 58.2    | 39     | 88    | 84 (68.3)  | 243   | 83 (67.5)  | 253   | 64       | 252   | 9 (7.3) | 41    | NA     | NA    |
| 2  |                 |      | (52.7-  | (50.6-  | (31.7) | (18.9 |            | (52.1 |            | (52.3 | (52.0)   | (54.1 |         | (8.8) |        |       |
| 3  |                 |      | 73.2)   | 65.7)   | )      | )     |            | )     |            | )     | )        | )     |         |       |        |       |
| 4  |                 |      |         |         |        |       |            |       |            |       |          |       |         |       |        |       |
| 5  |                 |      |         |         |        |       |            |       |            |       |          |       |         |       |        |       |
| 6  |                 |      |         |         |        |       |            |       |            |       |          |       |         |       |        |       |
| 7  |                 |      |         |         |        |       |            |       |            |       |          |       |         |       |        |       |
| 8  | <b>Dharma</b>   | 2020 | 60 (10) | 55 (10) | 403    | 1548  | 647 (69.6) | 2,889 | 299 (32.2) | 1,779 | 109      | 4,049 | NA      | NA    | NA     | NA    |
| 9  |                 |      |         |         | (43.4) | (27.5 |            | (51.3 |            | (31.6 | (11.7)   | (71.9 |         |       |        |       |
| 10 |                 |      |         |         | )      | )     |            | )     |            | )     | )        | )     |         |       |        |       |
| 11 |                 |      |         |         |        |       |            |       |            |       |          |       |         |       |        |       |
| 12 |                 |      |         |         |        |       |            |       |            |       |          |       |         |       |        |       |
| 13 |                 |      |         |         |        |       |            |       |            |       |          |       |         |       |        |       |
| 14 |                 |      |         |         |        |       |            |       |            |       |          |       |         |       |        |       |
| 15 |                 |      |         |         |        |       |            |       |            |       |          |       |         |       |        |       |
| 16 | <b>Kerkmanx</b> | 2020 | 68 (14) | 61 (12) | 39     | 66    | 101 (45.7) | 178   | 56 (25.9)  | 110   | 88       | 258   | 30      | 79    | 33     | 77    |
| 17 |                 |      |         |         | (17.6) | (12.5 |            | (33.6 |            | (21.0 | (41.1)   | (49.3 | (13.6)  | (13.7 | (14.4) | (14.2 |
| 18 |                 |      |         |         | )      | )     |            | )     |            | )     | )        | )     |         | )     |        | )     |
| 19 |                 |      |         |         |        |       |            |       |            |       |          |       |         |       |        |       |
| 20 |                 |      |         |         |        |       |            |       |            |       |          |       |         |       |        |       |
| 21 |                 |      |         |         |        |       |            |       |            |       |          |       |         |       |        |       |
| 22 |                 |      |         |         |        |       |            |       |            |       |          |       |         |       |        |       |
| 23 |                 |      |         |         |        |       |            |       |            |       |          |       |         |       |        |       |
| 24 | <b>Siabani</b>  | 2020 | 65.8    | 59.0    | 114    | 187   | 195 (63.7) | 410   | 110 (36.7) | 208   | 41       | 655   | NA      | NA    | NA     | NA    |
| 25 |                 |      | (11.3)  | (12.4)  | (37.7) | (16.2 |            | (35.4 |            | (18.5 | (13.2)   | (55.9 |         |       |        |       |
| 26 |                 |      |         |         | )      | )     |            | )     |            | )     | )        | )     |         |       |        |       |
| 27 |                 |      |         |         |        |       |            |       |            |       |          |       |         |       |        |       |
| 28 |                 |      |         |         |        |       |            |       |            |       |          |       |         |       |        |       |
| 29 |                 |      |         |         |        |       |            |       |            |       |          |       |         |       |        |       |
| 30 |                 |      |         |         |        |       |            |       |            |       |          |       |         |       |        |       |
| 31 |                 |      |         |         |        |       |            |       |            |       |          |       |         |       |        |       |
| 32 | <b>Tai</b>      | 2020 | 78 (76- | 78 (76- | 96     | 116   | 217 (79.5) | 319   | NA         | NA    | 14 (5.4) | 239   | NA      | NA    | 36     | 78    |
| 33 |                 |      | 81)     | 80)     | (35.2) | (26.5 |            | (72.8 |            |       |          | (56.5 |         |       | (13.5) | (18.1 |
| 34 |                 |      |         |         | )      | )     |            | )     |            |       |          | )     |         |       |        | )     |
| 35 |                 |      |         |         |        |       |            |       |            |       |          |       |         |       |        |       |
| 36 |                 |      |         |         |        |       |            |       |            |       |          |       |         |       |        |       |
| 37 |                 |      |         |         |        |       |            |       |            |       |          |       |         |       |        |       |
| 38 |                 |      |         |         |        |       |            |       |            |       |          |       |         |       |        |       |
| 39 |                 |      |         |         |        |       |            |       |            |       |          |       |         |       |        |       |
| 40 |                 |      |         |         |        |       |            |       |            |       |          |       |         |       |        |       |
| 41 |                 |      |         |         |        |       |            |       |            |       |          |       |         |       |        |       |
| 42 |                 |      |         |         |        |       |            |       |            |       |          |       |         |       |        |       |
| 43 |                 |      |         |         |        |       |            |       |            |       |          |       |         |       |        |       |
| 44 |                 |      |         |         |        |       |            |       |            |       |          |       |         |       |        |       |
| 45 |                 |      |         |         |        |       |            |       |            |       |          |       |         |       |        |       |
| 46 |                 |      |         |         |        |       |            |       |            |       |          |       |         |       |        |       |

|    |              |      |        |        |        |       |              |       |            |       |        |       |    |    |    |    |
|----|--------------|------|--------|--------|--------|-------|--------------|-------|------------|-------|--------|-------|----|----|----|----|
| 1  | <b>Tizón</b> | 2020 | 69.9   | 60.9   | 844    | 1,927 | 1,192 (34.2) | 2,722 | 878 (25.2) | 2,375 | 474    | 2,711 | NA | NA | NA | NA |
| 2  |              |      |        |        |        |       |              |       |            |       |        |       |    |    |    |    |
| 3  |              |      | (13.7) | (12.6) | (24.2) | (17.2 |              | (24.3 |            | (21.2 | (13.6) | (24.2 |    |    |    |    |
| 4  |              |      |        |        |        | )     |              | )     |            | )     |        | )     |    |    |    |    |
| 5  |              |      |        |        |        |       |              |       |            |       |        |       |    |    |    |    |
| 6  |              |      |        |        |        |       |              |       |            |       |        |       |    |    |    |    |
| 7  |              |      |        |        |        |       |              |       |            |       |        |       |    |    |    |    |
| 8  |              |      |        |        |        |       |              |       |            |       |        |       |    |    |    |    |
| 9  |              |      |        |        |        |       |              |       |            |       |        |       |    |    |    |    |
| 10 |              |      |        |        |        |       |              |       |            |       |        |       |    |    |    |    |
| 11 |              |      |        |        |        |       |              |       |            |       |        |       |    |    |    |    |
| 12 |              |      |        |        |        |       |              |       |            |       |        |       |    |    |    |    |
| 13 |              |      |        |        |        |       |              |       |            |       |        |       |    |    |    |    |
| 14 |              |      |        |        |        |       |              |       |            |       |        |       |    |    |    |    |
| 15 |              |      |        |        |        |       |              |       |            |       |        |       |    |    |    |    |
| 16 |              |      |        |        |        |       |              |       |            |       |        |       |    |    |    |    |
| 17 |              |      |        |        |        |       |              |       |            |       |        |       |    |    |    |    |
| 18 |              |      |        |        |        |       |              |       |            |       |        |       |    |    |    |    |
| 19 |              |      |        |        |        |       |              |       |            |       |        |       |    |    |    |    |
| 20 |              |      |        |        |        |       |              |       |            |       |        |       |    |    |    |    |
| 21 |              |      |        |        |        |       |              |       |            |       |        |       |    |    |    |    |
| 22 |              |      |        |        |        |       |              |       |            |       |        |       |    |    |    |    |
| 23 |              |      |        |        |        |       |              |       |            |       |        |       |    |    |    |    |
| 24 |              |      |        |        |        |       |              |       |            |       |        |       |    |    |    |    |
| 25 |              |      |        |        |        |       |              |       |            |       |        |       |    |    |    |    |
| 26 |              |      |        |        |        |       |              |       |            |       |        |       |    |    |    |    |
| 27 |              |      |        |        |        |       |              |       |            |       |        |       |    |    |    |    |
| 28 |              |      |        |        |        |       |              |       |            |       |        |       |    |    |    |    |
| 29 |              |      |        |        |        |       |              |       |            |       |        |       |    |    |    |    |
| 30 |              |      |        |        |        |       |              |       |            |       |        |       |    |    |    |    |
| 31 |              |      |        |        |        |       |              |       |            |       |        |       |    |    |    |    |
| 32 |              |      |        |        |        |       |              |       |            |       |        |       |    |    |    |    |
| 33 |              |      |        |        |        |       |              |       |            |       |        |       |    |    |    |    |
| 34 |              |      |        |        |        |       |              |       |            |       |        |       |    |    |    |    |
| 35 |              |      |        |        |        |       |              |       |            |       |        |       |    |    |    |    |
| 36 |              |      |        |        |        |       |              |       |            |       |        |       |    |    |    |    |
| 37 |              |      |        |        |        |       |              |       |            |       |        |       |    |    |    |    |
| 38 |              |      |        |        |        |       |              |       |            |       |        |       |    |    |    |    |
| 39 |              |      |        |        |        |       |              |       |            |       |        |       |    |    |    |    |
| 40 |              |      |        |        |        |       |              |       |            |       |        |       |    |    |    |    |
| 41 |              |      |        |        |        |       |              |       |            |       |        |       |    |    |    |    |
| 42 |              |      |        |        |        |       |              |       |            |       |        |       |    |    |    |    |
| 43 |              |      |        |        |        |       |              |       |            |       |        |       |    |    |    |    |
| 44 |              |      |        |        |        |       |              |       |            |       |        |       |    |    |    |    |
| 45 |              |      |        |        |        |       |              |       |            |       |        |       |    |    |    |    |
| 46 |              |      |        |        |        |       |              |       |            |       |        |       |    |    |    |    |

For peer review only

## Reference:

1. Virani SS, Alonso A, Benjamin EJ, et al. Heart Disease and Stroke Statistics-2020 Update: A Report From the American Heart Association. *Circulation* 2020;141(9):e139-e596. doi: 10.1161/cir.0000000000000757 [published Online First: 2020/01/30]
2. Pancholy SB, Shantha GP, Patel T, et al. Sex differences in short-term and long-term all-cause mortality among patients with ST-segment elevation myocardial infarction treated by primary percutaneous intervention: a meta-analysis. *JAMA internal medicine* 2014;174(11):1822-30. doi: 10.1001/jamainternmed.2014.4762 [published Online First: 2014/09/30]
3. Wenger NK, Arnold A, Bairey Merz CN, et al. Hypertension Across a Woman's Life Cycle. *Journal of the American College of Cardiology* 2018;71(16):1797-813. doi: 10.1016/j.jacc.2018.02.033 [published Online First: 2018/04/21]
4. Peters SAE, Woodward M. Sex Differences in the Burden and Complications of Diabetes. *Current diabetes reports* 2018;18(6):33. doi: 10.1007/s11892-018-1005-5 [published Online First: 2018/04/20]
5. Huded CP, Johnson M, Kravitz K, et al. 4-Step Protocol for Disparities in STEMI Care and Outcomes in Women. *Journal of the American College of Cardiology* 2018;71(19):2122-32. doi: 10.1016/j.jacc.2018.02.039 [published Online First: 2018/03/15]
6. Mehta LS, Beckie TM, DeVon HA, et al. Acute Myocardial Infarction in Women: A Scientific Statement From the American Heart Association. *Circulation* 2016;133(9):916-47. doi: 10.1161/cir.0000000000000351 [published Online First: 2016/01/27]

- 1  
2  
3  
4 7. Reed GW, Rossi JE, Cannon CP. Acute myocardial infarction. *Lancet (London, England)*  
5  
6 2017;389(10065):197-210. doi: 10.1016/s0140-6736(16)30677-8 [published Online  
7  
8 First: 2016/08/10]  
9  
10  
11 8. Moher D, Liberati A, Tetzlaff J, et al. Preferred reporting items for systematic reviews and  
12  
13 meta-analyses: the PRISMA statement. *BMJ (Clinical research ed)* 2009;339:b2535.  
14  
15 doi: 10.1136/bmj.b2535 [published Online First: 2009/07/23]  
16  
17  
18 9. Stang A. Critical evaluation of the Newcastle-Ottawa scale for the assessment of the quality  
19  
20 of nonrandomized studies in meta-analyses. *European journal of epidemiology*  
21  
22 2010;25(9):603-5. doi: 10.1007/s10654-010-9491-z [published Online First:  
23  
24 2010/07/24]  
25  
26  
27 10. Venetsanos D, Sederholm Lawesson S, Alfredsson J, et al. Association between gender  
28  
29 and short-term outcome in patients with ST elevation myocardial infraction participating  
30  
31 in the international, prospective, randomised Administration of Ticagrelor in the  
32  
33 catheterisation Laboratory or in the Ambulance for New ST elevation myocardial  
34  
35 Infarction to open the Coronary artery (ATLANTIC) trial: a prespecified analysis. *BMJ*  
36  
37 *open* 2017;7(9):e015241. doi: 10.1136/bmjopen-2016-015241 [published Online First:  
38  
39 2017/09/25]  
40  
41  
42 11. Ali M, Lange SA, Wittlinger T, et al. In-hospital mortality after acute STEMI in patients  
43  
44 undergoing primary PCI. *Herz* 2018;43(8):741-45. doi: 10.1007/s00059-017-4621-y  
45  
46 [published Online First: 2017/10/11]  
47  
48  
49 12. Langabeer JR, 2nd, Henry TD, Fowler R, et al. Sex-Based Differences in Discharge  
50  
51 Disposition and Outcomes for ST-Segment Elevation Myocardial Infarction Patients  
52  
53  
54  
55  
56  
57  
58  
59  
60

- 1  
2  
3  
4 Within a Regional Network. *Journal of women's health (2002)* 2018;27(8):1001-06. doi:  
5  
6 10.1089/jwh.2017.6553 [published Online First: 2018/01/11]  
7  
8  
9 13. Tang XF, Song Y, Xu JJ, et al. Effect of sex difference in clinical presentation (stable  
10  
11 coronary artery disease vs unstable angina pectoris or non-ST-elevation myocardial  
12  
13 infarction vs ST-elevation myocardial infarction) on 2-year outcomes in patients  
14  
15 undergoing percutaneous coronary intervention. *Journal of interventional cardiology*  
16  
17 2018;31(1):5-14. doi: 10.1111/joic.12451 [published Online First: 2017/10/13]  
18  
19  
20  
21  
22 14. Cenko E, van der Schaar M, Yoon J, et al. Sex-Related Differences in Heart Failure After  
23  
24 ST-Segment Elevation Myocardial Infarction. *Journal of the American College of*  
25  
26 *Cardiology* 2019;74(19):2379-89. doi: 10.1016/j.jacc.2019.08.1047 [published Online  
27  
28 First: 2019/11/09]  
29  
30  
31  
32 15. Hao Y, Liu J, Liu J, et al. Sex Differences in In-Hospital Management and Outcomes of  
33  
34 Patients With Acute Coronary Syndrome. *Circulation* 2019;139(15):1776-85. doi:  
35  
36 10.1161/circulationaha.118.037655 [published Online First: 2019/01/23]  
37  
38  
39  
40 16. Hannan EL, Wu Y, Tamis-Holland J, et al. Sex differences in the treatment and outcomes  
41  
42 of patients hospitalized with ST-elevation myocardial infarction. *Catheterization and*  
43  
44 *cardiovascular interventions : official journal of the Society for Cardiac Angiography &*  
45  
46 *Interventions* 2020;95(2):196-204. doi: 10.1002/ccd.28286 [published Online First:  
47  
48 2019/04/24]  
49  
50  
51  
52 17. Maznyczka AM, Carrick D, Carberry J, et al. Sex-based associations with microvascular  
53  
54 injury and outcomes after ST-segment elevation myocardial infarction. *Open heart*  
55  
56 2019;6(1):e000979. doi: 10.1136/openhrt-2018-000979 [published Online First:  
57  
58  
59  
60

- 1  
2  
3  
4 2019/06/07]
- 5  
6  
7 18. Stehli J, Martin C, Brennan A, et al. Sex Differences Persist in Time to Presentation,  
8  
9 Revascularization, and Mortality in Myocardial Infarction Treated With Percutaneous  
10  
11 Coronary Intervention. *Journal of the American Heart Association* 2019;8(10):e012161.  
12  
13 doi: 10.1161/jaha.119.012161 [published Online First: 2019/05/17]  
14  
15  
16  
17 19. Burgess SN, Juergens CP, Nguyen TL, et al. Comparison of Late Cardiac Death and  
18  
19 Myocardial Infarction Rates in Women Vs Men With ST-Elevation Myocardial Infarction.  
20  
21 *The American journal of cardiology* 2020;128:120-26. doi:  
22  
23 10.1016/j.amjcard.2020.04.044 [published Online First: 2020/07/12]  
24  
25  
26  
27 20. Dharma S, Dakota I, Andriantoro H, et al. Association of gender with clinical outcomes of  
28  
29 patients with acute ST-segment elevation myocardial infarction presenting with acute  
30  
31 heart failure. *Coronary artery disease* 2020 doi: 10.1097/mca.0000000000000892  
32  
33 [published Online First: 2020/04/26]  
34  
35  
36  
37 21. Kerkman T, Ten Brinke LBG, Huybrechts B, et al. Evaluation of sex differences in patients  
38  
39 with ST-elevated myocardial infarction: an observational cohort study in Amsterdam  
40  
41 and surrounding region. *Netherlands heart journal : monthly journal of the Netherlands*  
42  
43 *Society of Cardiology and the Netherlands Heart Foundation* 2020;28(11):595-603. doi:  
44  
45 10.1007/s12471-020-01435-9 [published Online First: 2020/06/13]  
46  
47  
48  
49 22. Siabani S, Davidson PM, Babakhani M, et al. Gender-based difference in early mortality  
50  
51 among patients with ST-segment elevation myocardial infarction: insights from  
52  
53 Kermanshah STEMI Registry. *Journal of cardiovascular and thoracic research*  
54  
55 2020;12(1):63-68. doi: 10.34172/jcvtr.2020.10 [published Online First: 2020/03/27]  
56  
57  
58  
59  
60

- 1  
2  
3  
4 23. Tai S, Li X, Yang H, et al. Sex Differences in the Outcomes of Elderly Patients with Acute  
5  
6 Coronary Syndrome. *Cardiology research and practice* 2020;2020:5091490. doi:  
7  
8 10.1155/2020/5091490 [published Online First: 2020/05/27]  
9  
10  
11 24. Tizón-Marcos H, Vaquerizo B, Marrugat J, et al. Differences in 30-day complications and  
12  
13 1-year mortality by sex in patients with a first STEMI managed by the Codi IAM network  
14  
15 between 2010 and 2016. *Revista española de cardiología (English ed)* 2020 doi:  
16  
17 10.1016/j.rec.2020.06.002 [published Online First: 2020/07/15]  
18  
19  
20 25. Bavishi C, Bangalore S, Patel D, et al. Short and long-term mortality in women and men  
21  
22 undergoing primary angioplasty: A comprehensive meta-analysis. *International journal*  
23  
24 *of cardiology* 2015;198:123-30. doi: 10.1016/j.ijcard.2015.07.001 [published Online  
25  
26 First: 2015/07/15]  
27  
28  
29 26. Kosmidou I, Redfors B, Selker HP, et al. Infarct size, left ventricular function, and prognosis  
30  
31 in women compared to men after primary percutaneous coronary intervention in ST-  
32  
33 segment elevation myocardial infarction: results from an individual patient-level pooled  
34  
35 analysis of 10 randomized trials. *European heart journal* 2017;38(21):1656-63. doi:  
36  
37 10.1093/eurheartj/ehx159 [published Online First: 2017/04/14]  
38  
39  
40 27. Millett ERC, Peters SAE, Woodward M. Sex differences in risk factors for myocardial  
41  
42 infarction: cohort study of UK Biobank participants. *BMJ (Clinical research ed)*  
43  
44 2018;363:k4247. doi: 10.1136/bmj.k4247 [published Online First: 2018/11/09]  
45  
46  
47 28. Yusuf S, Hawken S, Ounpuu S, et al. Effect of potentially modifiable risk factors associated  
48  
49 with myocardial infarction in 52 countries (the INTERHEART study): case-control study.  
50  
51 *Lancet (London, England)* 2004;364(9438):937-52. doi: 10.1016/s0140-  
52  
53  
54  
55  
56  
57  
58  
59  
60



- 1  
2  
3  
4 6736(04)17018-9 [published Online First: 2004/09/15]  
5  
6  
7 29. Harreiter J, Fadl H, Kautzky-Willer A, et al. Do Women with Diabetes Need More Intensive  
8  
9 Action for Cardiovascular Reduction than Men with Diabetes? *Current diabetes reports*  
10  
11 2020;20(11):61. doi: 10.1007/s11892-020-01348-2 [published Online First: 2020/10/10]  
12  
13  
14 30. Arora S, Stouffer GA, Kucharska-Newton AM, et al. Twenty Year Trends and Sex  
15  
16 Differences in Young Adults Hospitalized With Acute Myocardial Infarction. *Circulation*  
17  
18 2019;139(8):1047-56. doi: 10.1161/circulationaha.118.037137 [published Online First:  
19  
20 2018/12/28]  
21  
22  
23  
24 31. Zhao M, Woodward M, Vaartjes I, et al. Sex Differences in Cardiovascular Medication  
25  
26 Prescription in Primary Care: A Systematic Review and Meta-Analysis. *Journal of the*  
27  
28 *American Heart Association* 2020;9(11):e014742. doi: 10.1161/jaha.119.014742  
29  
30 [published Online First: 2020/05/21]  
31  
32  
33  
34 32. Eindhoven DC, Hilt AD, Zwaan TC, et al. Age and gender differences in medical adherence  
35  
36 after myocardial infarction: Women do not receive optimal treatment - The Netherlands  
37  
38 claims database. *European journal of preventive cardiology* 2018;25(2):181-89. doi:  
39  
40 10.1177/2047487317744363 [published Online First: 2017/11/23]  
41  
42  
43  
44 33. Smolina K, Ball L, Humphries KH, et al. Sex Disparities in Post-Acute Myocardial Infarction  
45  
46 Pharmacologic Treatment Initiation and Adherence: Problem for Young Women.  
47  
48 *Circulation Cardiovascular quality and outcomes* 2015;8(6):586-92. doi:  
49  
50 10.1161/circoutcomes.115.001987 [published Online First: 2015/10/16]  
51  
52  
53  
54 34. Nguyen HL, Goldberg RJ, Gore JM, et al. Age and sex differences, and changing trends,  
55  
56 in the use of evidence-based therapies in acute coronary syndromes: perspectives  
57  
58  
59  
60

- 1  
2  
3  
4 from a multinational registry. *Coronary artery disease* 2010;21(6):336-44. doi:  
5  
6 10.1097/MCA.0b013e32833ce07c [published Online First: 2010/07/28]  
7  
8  
9 35. Pelletier R, Humphries KH, Shimony A, et al. Sex-related differences in access to care  
10  
11 among patients with premature acute coronary syndrome. *CMAJ : Canadian Medical*  
12  
13 *Association journal = journal de l'Association medicale canadienne* 2014;186(7):497-  
14  
15 504. doi: 10.1503/cmaj.131450 [published Online First: 2014/03/19]  
16  
17  
18 36. Murphy AC, Yudi MB, Farouque O, et al. Impact of Gender and Door-to-Balloon Times on  
19  
20 Long-Term Mortality in Patients Presenting With ST-Elevation Myocardial Infarction.  
21  
22 *The American journal of cardiology* 2019;124(6):833-41. doi:  
23  
24 10.1016/j.amjcard.2019.06.008 [published Online First: 2019/07/23]  
25  
26  
27 37. D'Onofrio G, Safdar B, Lichtman JH, et al. Sex differences in reperfusion in young patients  
28  
29 with ST-segment-elevation myocardial infarction: results from the VIRGO study.  
30  
31 *Circulation* 2015;131(15):1324-32. doi: 10.1161/circulationaha.114.012293 [published  
32  
33 Online First: 2015/03/21]  
34  
35  
36 38. Bugiardini R, Ricci B, Cenko E, et al. Delayed Care and Mortality Among Women and Men  
37  
38 With Myocardial Infarction. *Journal of the American Heart Association* 2017;6(8) doi:  
39  
40 10.1161/jaha.117.005968 [published Online First: 2017/09/02]  
41  
42  
43 39. Khan NA, Daskalopoulou SS, Karp I, et al. Sex differences in acute coronary syndrome  
44  
45 symptom presentation in young patients. *JAMA internal medicine* 2013;173(20):1863-  
46  
47 71. doi: 10.1001/jamainternmed.2013.10149 [published Online First: 2013/09/18]  
48  
49  
50 40. Canto JG, Rogers WJ, Goldberg RJ, et al. Association of age and sex with myocardial  
51  
52 infarction symptom presentation and in-hospital mortality. *Jama* 2012;307(8):813-22.  
53  
54  
55  
56  
57  
58  
59  
60

1  
2  
3  
4 doi: 10.1001/jama.2012.199 [published Online First: 2012/02/24]  
5  
6

7 41. Moscucci M, Fox KA, Cannon CP, et al. Predictors of major bleeding in acute coronary  
8  
9 syndromes: the Global Registry of Acute Coronary Events (GRACE). *European heart*  
10  
11 *journal* 2003;24(20):1815-23. doi: 10.1016/s0195-668x(03)00485-8 [published Online  
12  
13  
14 First: 2003/10/18]  
15  
16

17 42. Kolte D, Khera S, Aronow WS, et al. Trends in incidence, management, and outcomes of  
18  
19 cardiogenic shock complicating ST-elevation myocardial infarction in the United States.  
20  
21 *Journal of the American Heart Association* 2014;3(1):e000590. doi:  
22  
23 10.1161/jaha.113.000590 [published Online First: 2014/01/15]  
24  
25  
26

27 43. Nanna MG, Hajduk AM, Krumholz HM, et al. Sex-Based Differences in Presentation,  
28  
29 Treatment, and Complications Among Older Adults Hospitalized for Acute Myocardial  
30  
31 Infarction: The SILVER-AMI Study. *Circulation Cardiovascular quality and outcomes*  
32  
33 2019;12(10):e005691. doi: 10.1161/circoutcomes.119.005691 [published Online First:  
34  
35 2019/10/15]  
36  
37  
38  
39

40 44. Elbadawi A, Elgendy IY, Mahmoud K, et al. Temporal Trends and Outcomes of Mechanical  
41  
42 Complications in Patients With Acute Myocardial Infarction. *JACC Cardiovascular*  
43  
44 *interventions* 2019;12(18):1825-36. doi: 10.1016/j.jcin.2019.04.039 [published Online  
45  
46  
47 First: 2019/09/21]  
48  
49  
50  
51  
52  
53  
54  
55  
56  
57  
58  
59  
60

1  
2  
3  
4 Figure 1 Flowchart of selection of studies included in meta-analysis.  
5  
6  
7  
8

9 Figure 2 Forest plots of relative risks of short-term all-cause mortality among women and  
10 men with ST-segment elevation myocardial infarction.  
11  
12

13 Forest plots showing unadjusted (A) and adjusted (B) short-term all-cause mortality of  
14 women compared with men with ST-segment elevation myocardial infarction using  
15 random-effects model.  
16  
17  
18  
19  
20  
21  
22  
23  
24

25 Figure 3 Forest plots of relative risks of long-term all-cause mortality among women and  
26 men with ST-segment elevation myocardial infarction.  
27  
28

29 Forest plots showing unadjusted (A) and adjusted (B) long-term all-cause mortality of  
30 women compared with men with ST-segment elevation myocardial infarction using  
31 random-effects model.  
32  
33  
34  
35  
36  
37  
38  
39  
40  
41  
42  
43  
44  
45  
46  
47  
48  
49  
50  
51  
52  
53  
54  
55  
56  
57  
58  
59  
60

Figure 1 Flowchart of selection of studies included in meta-analysis.

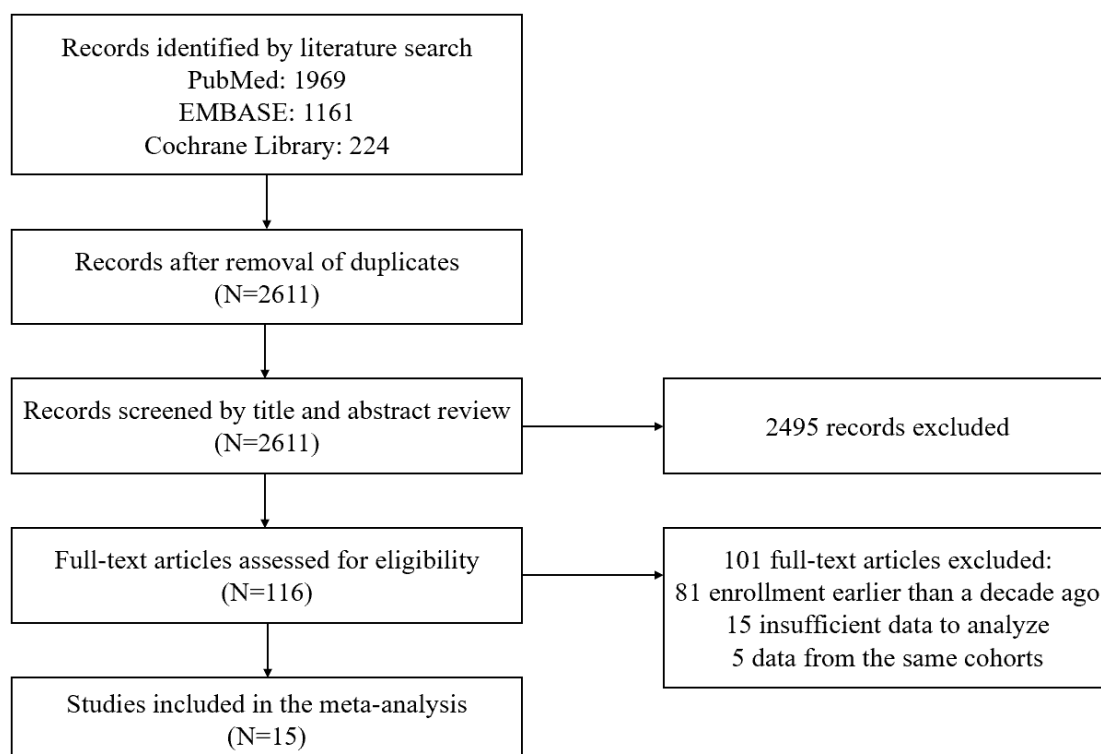

Figure 2 Forest plots of relative risks of short-term all-cause mortality among women and men with ST-segment elevation myocardial infarction.

A

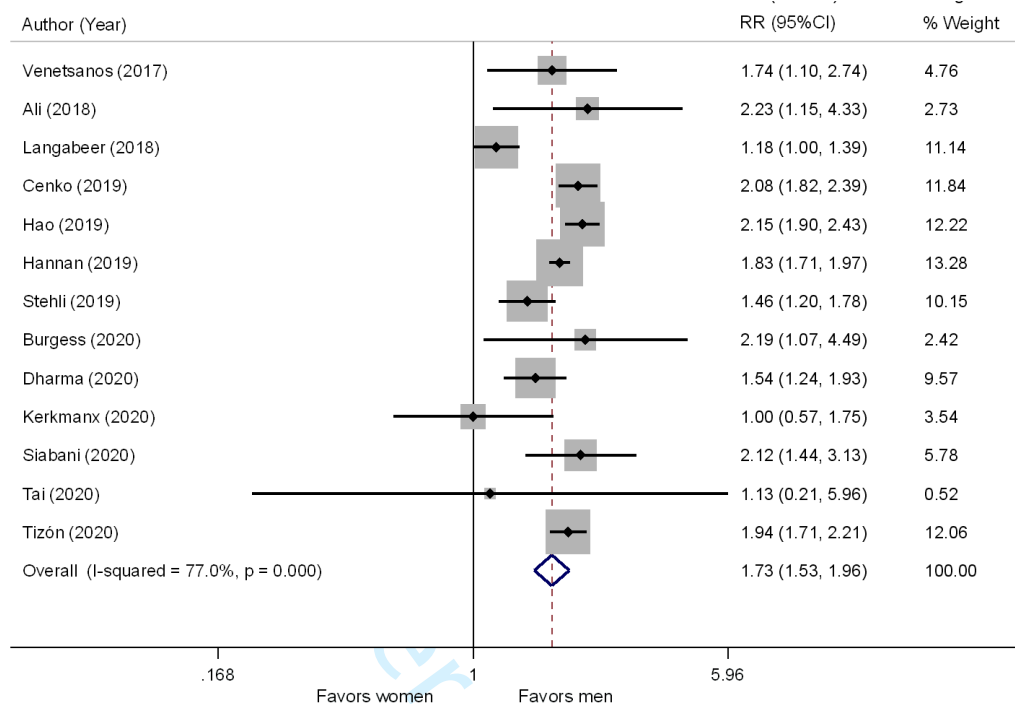

B



Forest plots showing unadjusted (A) and adjusted (B) short-term all-cause mortality of women compared with men with ST-segment elevation myocardial infarction using random-effects model.

Figure 3 Forest plots of relative risks of long-term all-cause mortality among women and men with ST-segment elevation myocardial infarction.

A



B

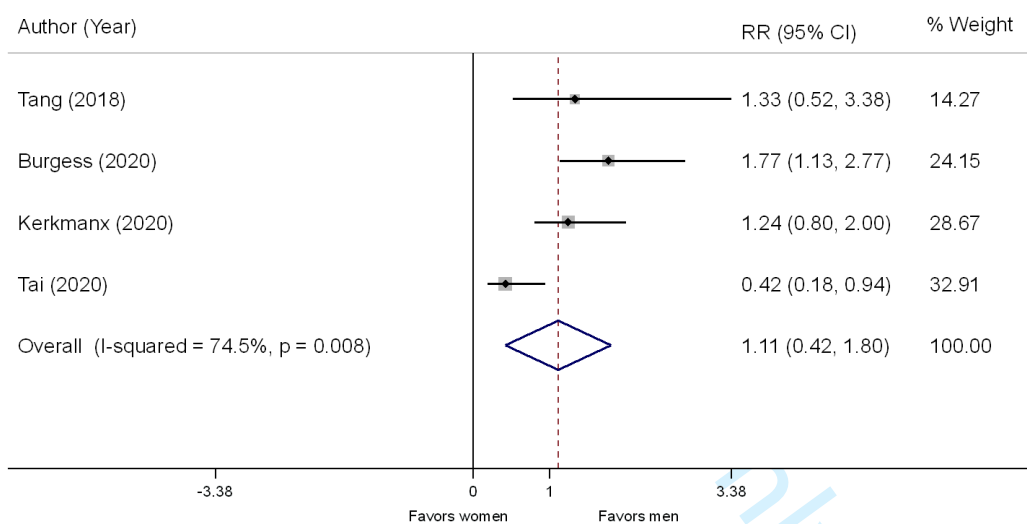

Forest plots showing unadjusted (A) and adjusted (B) long-term all-cause mortality of women compared with men with ST-segment elevation myocardial infarction using random-effects model.

Table 1 Variables adjusted in the adjusted analyses from the included studies.

| First Author      | Year | Adjusted Variables                                                                                                                                                                                                                                                                                                                                                                               |
|-------------------|------|--------------------------------------------------------------------------------------------------------------------------------------------------------------------------------------------------------------------------------------------------------------------------------------------------------------------------------------------------------------------------------------------------|
| <b>Venetsanos</b> | 2017 | age, weight, prior MI, prior PCI, patient's history of diabetes, hypertension, non-hemorrhagic stroke, gastrointestinal bleeding, time from symptom onset to pre-PCI ECG, admission Killip class, baseline hemoglobin, eGFR, access site, use of Glycoprotein IIIb/IIa inhibitor, bivalirudin and unfractionated heparin, location of MI and revascularization                                   |
| <b>Langabeer</b>  | 2018 | age, smoking, diabetes, prior CVD, prior stroke, heart failure, shock, length of stay, teaching, insurance, total ischemic time, door to balloon                                                                                                                                                                                                                                                 |
| <b>Tang</b>       | 2018 | age, BMI, LVEF, serum creatinine, use of proton pump inhibitors, use of dual-antiplatelet therapy, previous PCI, diabetes mellitus, hypertension, previous stroke, current smoker, thrombocytopenia, use of femoral approach, use of intra-aortic balloon pump, and multivessel disease                                                                                                          |
| <b>Cenko</b>      | 2019 | age, family history of CAD, diabetes, hypertension, hypercholesterolemia, current smoking, former smoking, prior angina pectoris, prior myocardial infarction, prior PCI, prior CABG, peripheral artery disease, prior stroke, ST-segment elevation in anterior leads (at ECG), systolic blood pressure at baseline, heart rate at baseline, serum creatinine at baseline, Killip Class $\geq 2$ |
| <b>Hao</b>        | 2019 | Age, medical insurance status, acute heart failure, cardiogenic shock, cardiac arrest at admission, heart rate and systolic blood pressure, diabetes mellitus, smoking, history of CHD, heart failure, renal failure, and cerebrovascular disease, prehospital statin use, renal insufficiency, and transfer status.                                                                             |
| <b>Hannan</b>     | 2019 | age, STEMI location, heart rate, mean arterial pressure, history                                                                                                                                                                                                                                                                                                                                 |



|                  |      |                                                                                                                                                                                                                                                                                                                                                                                                                                                                                                                                                                                                                                                                                                                                                                                                                                                                                                                                                                                                              |
|------------------|------|--------------------------------------------------------------------------------------------------------------------------------------------------------------------------------------------------------------------------------------------------------------------------------------------------------------------------------------------------------------------------------------------------------------------------------------------------------------------------------------------------------------------------------------------------------------------------------------------------------------------------------------------------------------------------------------------------------------------------------------------------------------------------------------------------------------------------------------------------------------------------------------------------------------------------------------------------------------------------------------------------------------|
|                  |      | of hospitalization in last year, history of PCI, history of CABG surgery, septicemia/sepsis/systemic inflammatory response /shock, metastatic cancer/acute leukemia, diabetes with acute complications, end stage liver disease, inflammatory bowel disease, coagulation defects and other specified hematological disorders, dementia, polyneuropathy, muscular dystrophy, seizure disorders and convulsions, coma/brain compression/anoxic damage, cardiorespiratory failure and shock, congestive heart failure, specified heart arrhythmias, ischemic or unspecified stroke, hemiplegia/hemiparesis, vascular disease with complications, vascular disease without complications, aspiration and specified bacterial pneumonias, acute renal failure, chronic kidney disease, Stage 5, unspecified renal failure, nephritis, pressure ulcer of skin with partial thickness skin loss*, pressure pre-ulcer skin changes, chronic ulcer of skin except pressure ulcer, lower limb/amputation complications |
| <b>Maznyczka</b> | 2019 | NA                                                                                                                                                                                                                                                                                                                                                                                                                                                                                                                                                                                                                                                                                                                                                                                                                                                                                                                                                                                                           |
| <b>Stehli</b>    | 2019 | age, diabetes mellitus, eGFR, previous PCI and/or coronary artery bypass grafting, history of peripheral vascular disease and CVD, LVEF, out-of-hospital and in-hospital cardiac arrest, cardiogenic shock, and occurrence time of symptom onset                                                                                                                                                                                                                                                                                                                                                                                                                                                                                                                                                                                                                                                                                                                                                             |
| <b>Burgess</b>   | 2020 | NA                                                                                                                                                                                                                                                                                                                                                                                                                                                                                                                                                                                                                                                                                                                                                                                                                                                                                                                                                                                                           |
| <b>Dharma</b>    | 2020 | NA                                                                                                                                                                                                                                                                                                                                                                                                                                                                                                                                                                                                                                                                                                                                                                                                                                                                                                                                                                                                           |
| <b>Kerkmanx</b>  | 2020 | NA                                                                                                                                                                                                                                                                                                                                                                                                                                                                                                                                                                                                                                                                                                                                                                                                                                                                                                                                                                                                           |
| <b>Siabani</b>   | 2020 | BMI $\geq$ 25, hypertension, diabetes, current smoking, hypercholesterolemia, congestive heart failure, Killip class (at first presentation) $\geq$ II, symptom-to-balloon time > 360 min and door-to-balloon time > 90 min                                                                                                                                                                                                                                                                                                                                                                                                                                                                                                                                                                                                                                                                                                                                                                                  |

|              |      |                                                                                                                        |
|--------------|------|------------------------------------------------------------------------------------------------------------------------|
| <b>Tai</b>   | 2020 | NA                                                                                                                     |
| <b>Tizón</b> | 2020 | age, diabetes mellitus, recruitment year, time from symptom onset to culprit coronary artery opening, and Killip class |

MI: myocardial infarction, PCI: percutaneous coronary intervention, ECG: electrocardiograph, eGFR: estimated glomerular filtration rate, CVD: cardiovascular disease, BMI: body mass index, LVEF: left ventricular ejection fraction, CABG: coronary artery bypass graft, CAD: coronary artery disease,

For peer review only

1  
2  
3  
4  
5  
6  
7  
8  
9  
10  
11  
12  
13  
14  
15  
16  
17  
18  
19  
20  
21  
22  
23  
24  
25  
26  
27  
28  
29  
30  
31  
32  
33  
34  
35  
36  
37  
38  
39  
40  
41  
42  
43  
44  
45  
46

eTable 2 Assessment of study quality using Newcastle-Ottawa scale.

| First Author | Year | Selection                                |                                    |                                       |                                                   | Comparability | Outcome               |                                             |                       | Total point |
|--------------|------|------------------------------------------|------------------------------------|---------------------------------------|---------------------------------------------------|---------------|-----------------------|---------------------------------------------|-----------------------|-------------|
|              |      | Representativeness of the exposed cohort | Selection of the no exposed cohort | Ascertainment of exposure to implants | Outcome of interest not present at start of study |               | Assessment of outcome | Follow-up long enough for outcomes to occur | Adequacy of follow-up |             |
| Venetsanos   | 2017 | *                                        | *                                  | *                                     | *                                                 | **            | *                     | \                                           | *                     | 8           |
| Ali          | 2018 | \                                        | \                                  | *                                     | *                                                 | \             | *                     | \                                           | *                     | 4           |
| Langabeer    | 2018 | *                                        | *                                  | *                                     | *                                                 | *             | *                     | \                                           | *                     | 7           |
| Tang         | 2018 | \                                        | \                                  | *                                     | *                                                 | **            | *                     | *                                           | *                     | 7           |
| Cenko        | 2019 | *                                        | *                                  | *                                     | *                                                 | **            | *                     | \                                           | *                     | 8           |
| Hao          | 2019 | *                                        | *                                  | *                                     | *                                                 | **            | *                     | \                                           | *                     | 8           |
| Hannan       | 2019 | *                                        | *                                  | *                                     | *                                                 | **            | *                     | \                                           | *                     | 8           |
| Maznyczka    | 2019 | \                                        | \                                  | *                                     | *                                                 | \             | *                     | *                                           | *                     | 5           |
| Stehli       | 2019 | *                                        | *                                  | *                                     | *                                                 | **            | *                     | \                                           | *                     | 8           |

|                 |      |   |   |   |   |    |   |   |   |   |
|-----------------|------|---|---|---|---|----|---|---|---|---|
| <b>Burgess</b>  | 2020 | \ | \ | * | * | ** | * | * | * | 7 |
| <b>Dharma</b>   | 2020 | \ | \ | * | * | *  | * | * | * | 6 |
| <b>Kerkmanx</b> | 2020 | * | * | * | * | \  | * | * | * | 7 |
| <b>Siabani</b>  | 2020 | \ | \ | * | * | *  | * | \ | * | 5 |
| <b>Tai</b>      | 2020 | \ | \ | * | * | ** | * | * | * | 7 |
| <b>Tizón</b>    | 2020 | * | * | * | * | ** | * | * | * | 9 |

eFigure 1

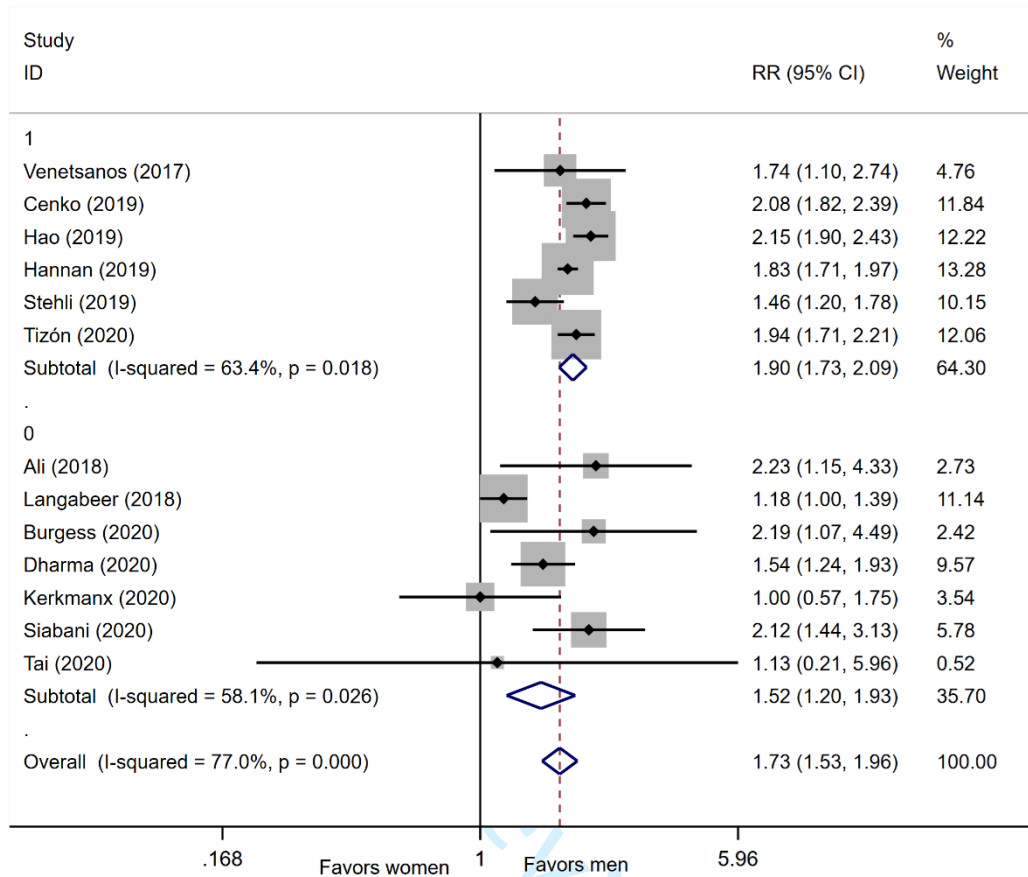

eFigure 2 Meta-influence analysis for unadjusted short-term mortality

1  
2  
3  
4  
5  
6  
7  
8  
9  
10  
11  
12  
13  
14  
15  
16  
17  
18  
19  
20  
21  
22  
23  
24  
25  
26  
27  
28  
29  
30  
31  
32  
33  
34  
35  
36  
37  
38  
39  
40  
41  
42  
43  
44  
45  
46  
47  
48  
49  
50  
51  
52  
53  
54  
55  
56  
57  
58  
59  
60

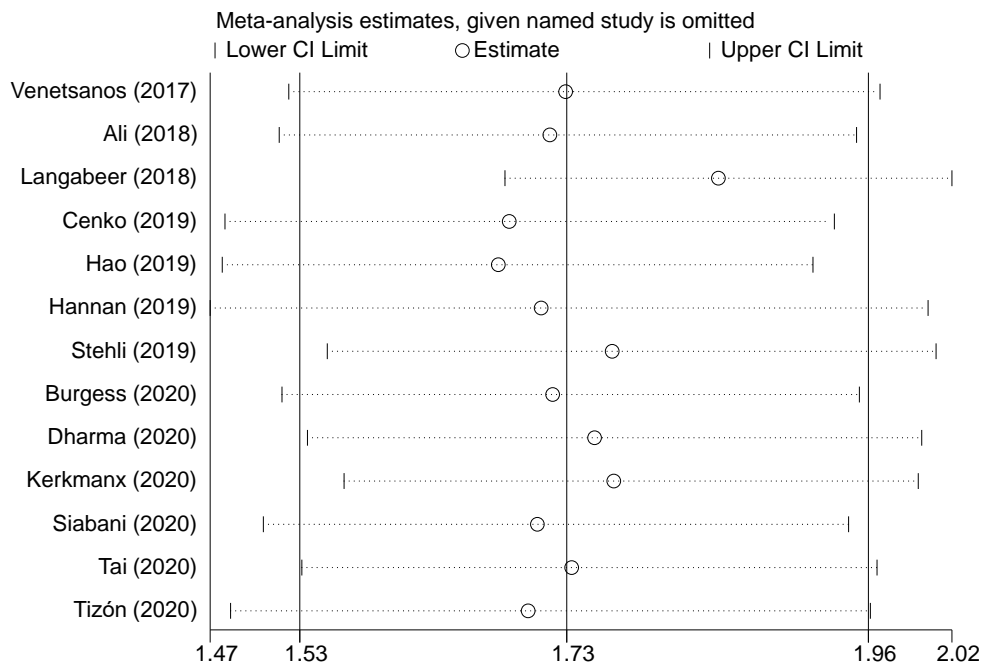

eFigure 3 Meta-influence analysis for unadjusted long-term mortality

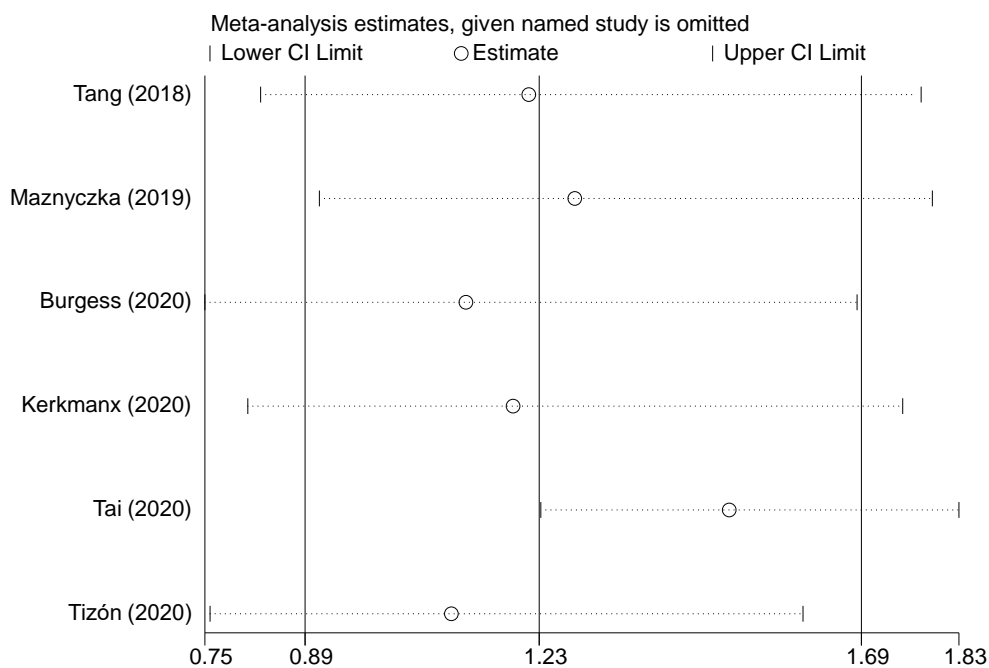

eFigure 4 Funnel plots for publication bias for unadjusted short-term (A) and long-term (B) mortality

A

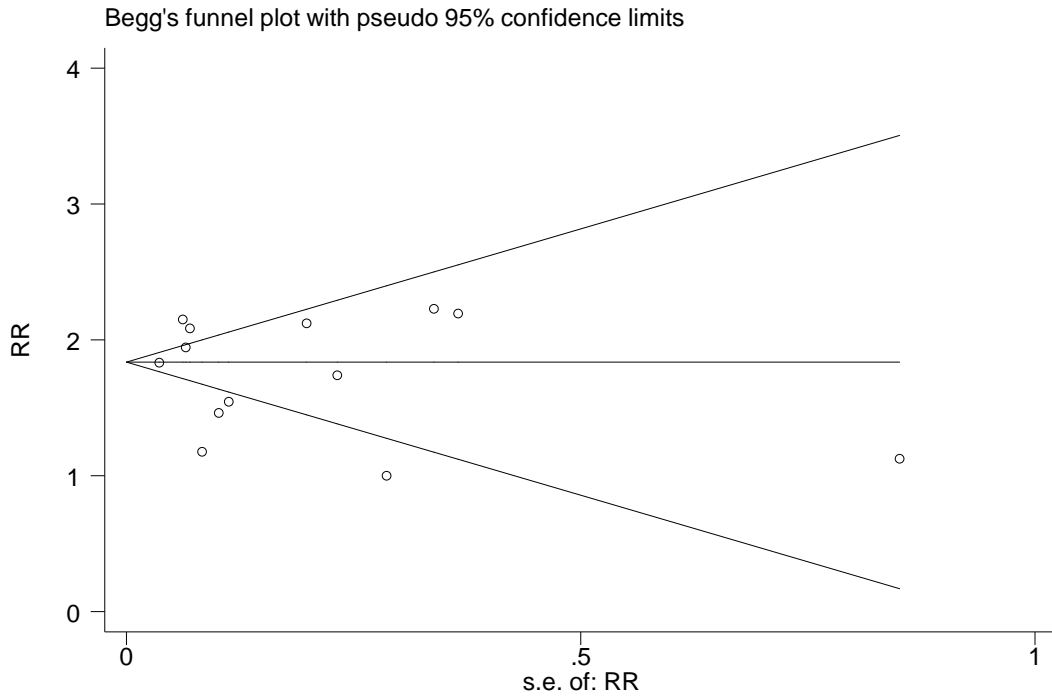

26  
27  
28  
29  
30  
31  
32  
33  
34  
35  
36  
37  
38  
39  
40  
41  
42  
43  
44  
45  
46  
47  
48  
49  
50  
51  
52  
53  
54  
55  
56  
57  
58  
59  
60

B

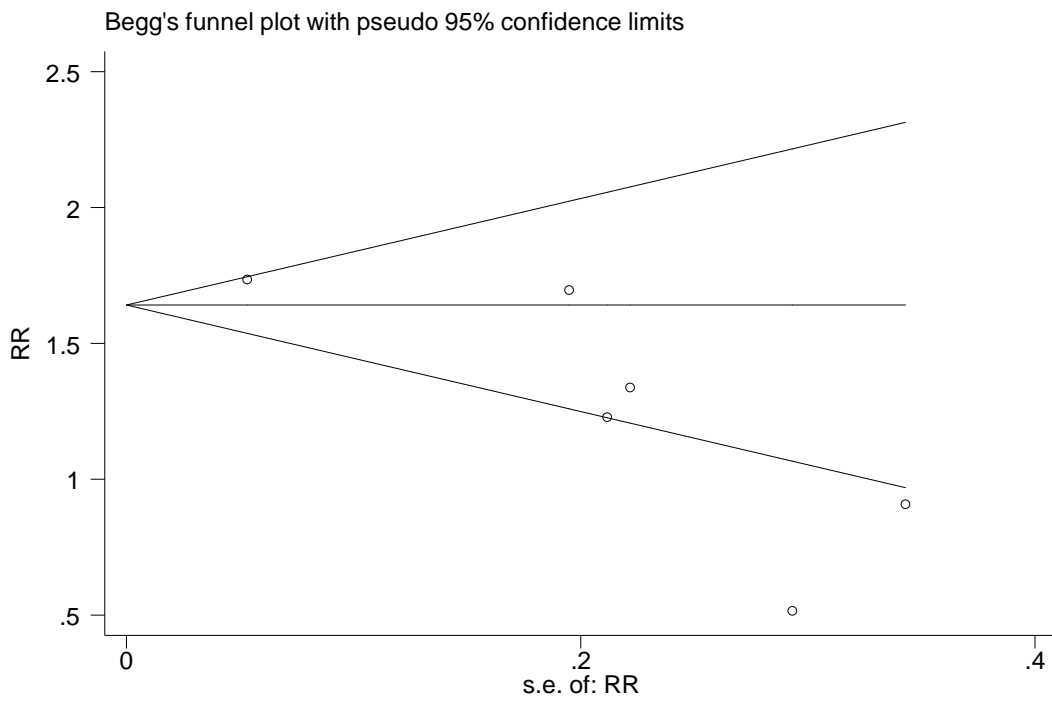



## PRISMA 2020 Checklist

1  
2  
3  
4  
5  
6  
7  
8  
9  
10  
11  
12  
13  
14  
15  
16  
17  
18  
19  
20  
21  
22  
23  
24  
25  
26  
27  
28  
29  
30  
31  
32  
33  
34  
35  
36  
37  
38  
39  
40  
41  
42  
43  
44  
45  
46  
47

| Section and Topic             | Item # | Checklist item                                                                                                                                                                                                                                                                                       | Location where item is reported |
|-------------------------------|--------|------------------------------------------------------------------------------------------------------------------------------------------------------------------------------------------------------------------------------------------------------------------------------------------------------|---------------------------------|
| <b>TITLE</b>                  |        |                                                                                                                                                                                                                                                                                                      |                                 |
| Title                         | 1      | Identify the report as a systematic review.                                                                                                                                                                                                                                                          | Title                           |
| <b>ABSTRACT</b>               |        |                                                                                                                                                                                                                                                                                                      |                                 |
| Abstract                      | 2      | See the PRISMA 2020 for Abstracts checklist.                                                                                                                                                                                                                                                         | Abstract                        |
| <b>INTRODUCTION</b>           |        |                                                                                                                                                                                                                                                                                                      |                                 |
| Rationale                     | 3      | Describe the rationale for the review in the context of existing knowledge.                                                                                                                                                                                                                          | Page 4                          |
| Objectives                    | 4      | Provide an explicit statement of the objective(s) or question(s) the review addresses.                                                                                                                                                                                                               | Page 4                          |
| <b>METHODS</b>                |        |                                                                                                                                                                                                                                                                                                      |                                 |
| Eligibility criteria          | 5      | Specify the inclusion and exclusion criteria for the review and how studies were grouped for the syntheses.                                                                                                                                                                                          | Page 5                          |
| Information sources           | 6      | Specify all databases, registers, websites, organisations, reference lists and other sources searched or consulted to identify studies. Specify the date when each source was last searched or consulted.                                                                                            | Page 4                          |
| Search strategy               | 7      | Present the full search strategies for all databases, registers and websites, including any filters and limits used.                                                                                                                                                                                 | Page 4                          |
| Selection process             | 8      | Specify the methods used to decide whether a study met the inclusion criteria of the review, including how many reviewers screened each record and each report retrieved, whether they worked independently, and if applicable, details of automation tools used in the process.                     | Page 5                          |
| Data collection process       | 9      | Specify the methods used to collect data from reports, including how many reviewers collected data from each report, whether they worked independently, any processes for obtaining or confirming data from study investigators, and if applicable, details of automation tools used in the process. | Page 5                          |
| Data items                    | 10a    | List and define all outcomes for which data were sought. Specify whether all results that were compatible with each outcome domain in each study were sought (e.g. for all measures, time points, analyses), and if not, the methods used to decide which results to collect.                        | Page 5                          |
|                               | 10b    | List and define all other variables for which data were sought (e.g. participant and intervention characteristics, funding sources). Describe any assumptions made about any missing or unclear information.                                                                                         | Page 5                          |
| Study risk of bias assessment | 11     | Specify the methods used to assess risk of bias in the included studies, including details of the tool(s) used, how many reviewers assessed each study and whether they worked independently, and if applicable, details of automation tools used in the process.                                    | Page 5                          |
| Effect measures               | 12     | Specify for each outcome the effect measure(s) (e.g. risk ratio, mean difference) used in the synthesis or presentation of results.                                                                                                                                                                  | Page 5                          |
| Synthesis methods             | 13a    | Describe the processes used to decide which studies were eligible for each synthesis (e.g. tabulating the study intervention characteristics and comparing against the planned groups for each synthesis (item #5)).                                                                                 | Page 5                          |
|                               | 13b    | Describe any methods required to prepare the data for presentation or synthesis, such as handling of missing summary statistics, or data conversions.                                                                                                                                                | Page 5                          |
|                               | 13c    | Describe any methods used to tabulate or visually display results of individual studies and syntheses.                                                                                                                                                                                               | Page 5                          |
|                               | 13d    | Describe any methods used to synthesize results and provide a rationale for the choice(s). If meta-analysis was performed, describe the model(s), method(s) to identify the presence and extent of statistical heterogeneity, and software package(s) used.                                          | Page 5                          |
|                               | 13e    | Describe any methods used to explore possible causes of heterogeneity among study results (e.g. subgroup analysis, meta-regression).                                                                                                                                                                 | Page 5                          |
|                               | 13f    | Describe any sensitivity analyses conducted to assess robustness of the synthesized results.                                                                                                                                                                                                         | Page 5                          |
| Reporting bias assessment     | 14     | Describe any methods used to assess risk of bias due to missing results in a synthesis (arising from reporting biases).                                                                                                                                                                              | Page 5                          |
| Certainty assessment          | 15     | Describe any methods used to assess certainty (or confidence) in the body of evidence for an outcome.                                                                                                                                                                                                | Page 5                          |





## PRISMA 2020 Checklist

1  
2  
3  
4  
5  
6  
7  
8  
9  
10  
11  
12  
13  
14  
15  
16  
17  
18  
19  
20  
21  
22  
23  
24  
25  
26  
27  
28  
29  
30  
31  
32  
33  
34  
35  
36  
37  
38  
39  
40  
41  
42  
43  
44  
45  
46  
47

| Section and Topic                              | Item # | Checklist item                                                                                                                                                                                                                                                                       | Location where item is reported |
|------------------------------------------------|--------|--------------------------------------------------------------------------------------------------------------------------------------------------------------------------------------------------------------------------------------------------------------------------------------|---------------------------------|
| <b>RESULTS</b>                                 |        |                                                                                                                                                                                                                                                                                      |                                 |
| Study selection                                | 16a    | Describe the results of the search and selection process, from the number of records identified in the search to the number of studies included in the review, ideally using a flow diagram.                                                                                         | Figure 1                        |
|                                                | 16b    | Cite studies that might appear to meet the inclusion criteria, but which were excluded, and explain why they were excluded.                                                                                                                                                          | Page 6                          |
| Study characteristics                          | 17     | Cite each included study and present its characteristics.                                                                                                                                                                                                                            | Table 1                         |
| Risk of bias in studies                        | 18     | Present assessments of risk of bias for each included study.                                                                                                                                                                                                                         | Page 7                          |
| Results of individual studies                  | 19     | For all outcomes, present, for each study: (a) summary statistics for each group (where appropriate) and (b) an effect estimate and its precision (e.g. confidence/credible interval), ideally using structured tables or plots.                                                     | Table 2                         |
| Results of syntheses                           | 20a    | For each synthesis, briefly summarise the characteristics and risk of bias among contributing studies.                                                                                                                                                                               | Page 6                          |
|                                                | 20b    | Present results of all statistical syntheses conducted. If meta-analysis was done, present for each the summary estimate and its precision (e.g. confidence/credible interval) and measures of statistical heterogeneity. If comparing groups, describe the direction of the effect. | Page 6                          |
|                                                | 20c    | Present results of all investigations of possible causes of heterogeneity among study results.                                                                                                                                                                                       | Page 6                          |
|                                                | 20d    | Present results of all sensitivity analyses conducted to assess the robustness of the synthesized results.                                                                                                                                                                           | Page 7                          |
| Reporting biases                               | 21     | Present assessments of risk of bias due to missing results (arising from reporting biases) for each synthesis assessed.                                                                                                                                                              | Page 7                          |
| Certainty of evidence                          | 22     | Present assessments of certainty (or confidence) in the body of evidence for each outcome assessed.                                                                                                                                                                                  | Page 6                          |
| <b>DISCUSSION</b>                              |        |                                                                                                                                                                                                                                                                                      |                                 |
| Discussion                                     | 23a    | Provide a general interpretation of the results in the context of other evidence.                                                                                                                                                                                                    | Page 7                          |
|                                                | 23b    | Discuss any limitations of the evidence included in the review.                                                                                                                                                                                                                      | Page 8-9                        |
|                                                | 23c    | Discuss any limitations of the review processes used.                                                                                                                                                                                                                                | Page 8-9                        |
|                                                | 23d    | Discuss implications of the results for practice, policy, and future research.                                                                                                                                                                                                       | Page 7-8                        |
| <b>OTHER INFORMATION</b>                       |        |                                                                                                                                                                                                                                                                                      |                                 |
| Registration and protocol                      | 24a    | Provide registration information for the review, including register name and registration number, or state that the review was not registered.                                                                                                                                       |                                 |
|                                                | 24b    | Indicate where the review protocol can be accessed, or state that a protocol was not prepared.                                                                                                                                                                                       |                                 |
|                                                | 24c    | Describe and explain any amendments to information provided at registration or in the protocol.                                                                                                                                                                                      |                                 |
| Support                                        | 25     | Describe sources of financial or non-financial support for the review, and the role of the funders or sponsors in the review.                                                                                                                                                        |                                 |
| Competing interests                            | 26     | Declare any competing interests of review authors.                                                                                                                                                                                                                                   |                                 |
| Availability of data, code and other materials | 27     | Report which of the following are publicly available and where they can be found: template data collection forms; data extracted from included studies; data used for all analyses; analytic code; any other materials used in the review.                                           |                                 |

From: Page MJ, McKenzie JE, Bossuyt PM, Boutron I, Hoffmann TC, Mulrow CD, et al. The PRISMA 2020 statement: an updated guideline for reporting systematic reviews. *BMJ* 2021;372:n71. doi: 10.1136/bmj.n71

For peer review only - <http://bmjopen.bmj.com/site/about/guidelines.xhtml>  
For more information, visit: <http://www.prisma-statement.org/>

1  
2  
3  
4 **Contemporary sex differences in mortality among patients with ST-segment elevation**  
5  
6 **myocardial infarction: a systematic review and meta-analysis**  
7

8  
9 **Short title : Sex differences in STEMI**  
10

11 **Authors:**

12  
13  
14 Ziwei Xi<sup>1</sup>, Hong Qiu<sup>1</sup>, Tingting Guo<sup>2</sup>, Yong Wang<sup>1</sup>, Jianan Li<sup>3,1</sup>, Yang Li<sup>1</sup>, Jianfeng Zheng<sup>1</sup>,

15  
16  
17 Runlin Gao<sup>1</sup>  
18

19 *1. Department of Cardiology, Coronary artery disease center, Fuwai Hospital, National*  
20 *Center for Cardiovascular Diseases, Chinese Academy of Medical Sciences and Peking*  
21 *Union Medical College, Beijing, China*  
22  
23  
24

25 *2. Thrombosis Center, National Center for Cardiovascular Diseases, State Key*  
26 *Laboratory of Cardiovascular Disease, Fuwai Hospital, Chinese Academy of Medical*  
27 *Sciences and Peking Union Medical College, Beijing, China*  
28  
29  
30

31 *3. Department of Cardiology and Macrovascular Disease, Beijing Tiantan Hospital,*  
32 *Capital Medical University, Beijing, China*  
33  
34  
35

36  
37  
38 **Corresponding author:**  
39

40  
41  
42  
43 Prof. Hong Qiu, M.D.  
44

45  
46  
47 E-mail address: qiuHong6780@sina.com  
48

49  
50  
51 Department and affiliation: Department of Cardiology, Coronary artery disease center,  
52  
53 Fuwai Hospital, National Center for Cardiovascular Diseases, Chinese Academy of  
54  
55 Medical Sciences and Peking Union Medical College, Beijing, China  
56

57  
58  
59 Telephone: 0016-13261179000  
60

1  
2  
3  
4  
5  
6  
7  
8  
9  
10  
11  
12  
13  
14  
15  
16  
17  
18  
19  
20  
21  
22  
23  
24  
25  
26  
27  
28  
29  
30  
31  
32  
33  
34  
35  
36  
37  
38  
39  
40  
41  
42  
43  
44  
45  
46  
47  
48  
49  
50  
51  
52  
53  
54  
55  
56  
57  
58  
59  
60

Address: No.167 North Lishi Road, Xicheng District, Beijing, China

For peer review only

1  
2  
3  
4 **Contemporary sex differences in mortality among patients with ST-segment elevation**  
5  
6 **myocardial infarction: a systematic review and meta-analysis**  
7  
8  
9  
10

11 **Objectives:** To assess the effect of sex differences on short- and long-term mortality among  
12 patients with ST-segment elevation myocardial infarction (STEMI).  
13  
14  
15

16  
17  
18  
19 **Design:** Systematic review and meta-analysis of contemporary available evidence.  
20  
21  
22

23  
24  
25 **Setting:** PubMed, Embase and Cochrane Library were searched for relevant studies  
26 reporting sex specific outcomes among patients with STEMI published between January  
27 1, 2010 to August 1, 2020. Risk ratio (RR) 95% 95% confidence intervals (CIs) were  
28 measured using DerSimonian and Laird random-effects model. Sensitivity analyses were  
29 performed and publication bias was also checked. All statistical analyses were performed  
30 using STATA version 15.0.  
31  
32  
33  
34  
35  
36  
37  
38  
39  
40  
41  
42

43 **Participants:** Studies providing data about short- or long-term mortality stratified by sex in  
44 patients with STEMI were included. Only study conducted in last ten years were included.  
45  
46  
47  
48  
49

50 **Primary and secondary outcome measures:** The primary outcome was all-cause death at  
51 short-(in-hospital or 30 days) and long-term (at least 12 months) follow-up.  
52  
53  
54  
55  
56  
57

58 **Results**  
59  
60

1  
2  
3  
4 A total of fifteen studies involving 128,585 patients (31,706 [24.7%] female and 96,879  
5  
6 [75.3%] male) were included. In the unadjusted analyses, female were at a higher risk of  
7  
8 short-term mortality (RR, 1.73; 95%CI, 1.53-1.96, P<0.001, I<sup>2</sup>=77%) but not long-term  
9  
10 mortality (RR, 1.23; 95%CI, 0.89-1.69, P=0.206, I<sup>2</sup>=77.5%). When adjusted effect  
11  
12 estimates from individual studies were used in meta-analysis, the association between  
13  
14 female and higher risk of short-term mortality remained significant (RR, 1.24; 95%CI, 1.11-  
15  
16 1.38, P<0.001, I<sup>2</sup>=39.6%). And adjusted long-term mortality was also similar between  
17  
18 female and male (RR, 1.11; 95%CI, 0.42-1.80, P=0.670, I<sup>2</sup>=74.5%).  
19  
20  
21  
22  
23  
24  
25  
26  
27

## 28 Conclusions

29  
30 An increased short- but not long-term mortality was found in female with STEMI. After  
31  
32 adjustment for baseline cardiovascular risk factors and clinical profiles, short-term mortality  
33  
34 remains higher in female with STEMI compared to male, indicating the need for further  
35  
36 improvements in management in female patients.  
37  
38  
39  
40  
41  
42  
43  
44  
45  
46  
47  
48  
49  
50  
51  
52  
53  
54  
55  
56  
57  
58  
59  
60

#### Strengths and limitations of this study

- ♦ We assessed the contemporary effect of sex differences on mortality among patients with STEMI by meta-analysis of studies from the last decade.
- ♦ A greater number of potentially eligible articles were screened and the large sample size ensures adequate statistical power to detect even a small effect of interest.
- ♦ Sensitivity analyses by excluding one study at a time and restricting to studies with high quality or with large sample size got consistent results.
- ♦ Substantial and nonnegligible heterogeneity still exist in our meta-analysis and might result in potential bias.
- ♦ Residual confounding bias could not be totally excluded due to the observational study design of most included studies.

## Contemporary sex differences in short- and long-term mortality among patients with ST-segment elevation myocardial infarction: a systematic review and meta-analysis

### Introduction

Acute myocardial infarction remains one of leading causes of mortality in both men and women worldwide despite improvement of acute cardiac care.<sup>1</sup> Numerous studies have reported that women have a higher risk of in-hospital and long-term adverse outcomes following ST-segment elevation myocardial infarction (STEMI) compared with men.<sup>2</sup> Confounders including advanced age and more frequent comorbidities, such as hypertension and diabetes mellitus<sup>3 4</sup>, might contribute to excess mortality in women. Moreover, previous studies show lower rates of guideline directed medical therapy and revascularization are also associated with poorer prognosis for women with STEMI.<sup>5</sup>

Sex discrepancies in management and outcomes after STEMI have been increasingly reported in the literature and raised public awareness.<sup>6</sup> Major progress in therapy for myocardial infarction and primary and secondary preventive interventions has been made to reduce cardiovascular mortality for women.<sup>1 7</sup> And there have been marked reductions in cardiovascular disease mortality in women with acute myocardial infarction in the past two decades.<sup>1</sup> Conflicting results are noted in recent studies on sex differences following STEMI. It is unclear whether the sex differences still exist, in view of substantial improvements in prognosis of cardiovascular disease over the past decade.

In order to assess the contemporary effect of sex differences on short- and long-term

1  
2  
3  
4 mortality among patients with STEMI, we performed a systematic review and meta-  
5  
6 analysis of all available evidence from last decade reporting sex-specific outcomes after  
7  
8 STEMI.  
9  
10

## 11 12 13 14 **Methods**

15  
16  
17  
18  
19 The present systematic review and meta-analysis was performed following the principle  
20  
21 of the Preferred Reporting Items for Systematic Reviews and Meta-Analyses (PRISMA)  
22  
23 statement.<sup>8</sup>  
24  
25  
26  
27  
28  
29

### 30 *Literature search*

31  
32 We conducted a comprehensive search of the PubMed, EMBASE, and Cochrane Library  
33  
34 from January 1, 2010 to August 1, 2020 to identify studies from the last decade that  
35  
36 described sex differences in in short- or long-term mortality among patients with STEMI.  
37  
38 **Both observational studies and randomized clinical trials were eligible.** We queried MeSH  
39  
40 and the abstract text for the following three search terms: gender part (including "gender",  
41  
42 "female", "male", "gender differences", "sex differences" or "sex characteristics"); outcome  
43  
44 part (including "death", "mortality", "hospital mortality", "cardiac death", "sudden cardiac  
45  
46 death", "all-cause mortality", "long term mortality", "one year mortality", "cardiovascular  
47  
48 mortality" or "short term mortality"); myocardial infarction part (including "myocardial  
49  
50 infarction", "acute myocardial infarction", "myocardial necrosis", "ST segment elevation  
51  
52 myocardial infarction", "primary PCI", "primary percutaneous coronary intervention" or  
53  
54  
55  
56  
57  
58  
59  
60



1  
2  
3  
4 "primary angioplasty") to identify relevant studies. There was no language restriction or  
5  
6 age limit.  
7  
8  
9

### 10 11 *Study selection*

12  
13  
14 According to the aim of our analyses, studies were included in this systematic review if  
15  
16 data about short- (in-hospital or 30 days) or long-term (at least 12 months) mortality  
17  
18 stratified by sex in patients with STEMI were reported. Two reviewers identified studies  
19  
20 eligible for further review by performing an initial screen of titles or abstracts of the search  
21  
22 results. Subsequently, a second screen of full texts eligibility was performed by another  
23  
24 two reviewers. Studies had to fulfil the following criteria to be included in the present  
25  
26 analyses: i) studies reporting data on all-cause mortality specific to STEMI population; and  
27  
28 ii) studies providing enough details to obtain numbers of events or incidence rates  
29  
30 according to sex; and iii) enrollment starting earlier than a decade ago. Editorials, letters,  
31  
32 conference proceedings and abstracts were considered to be eligible only if sufficient  
33  
34 information was available in abstracts or associated tables or figures. We excluded studies  
35  
36 if they were review articles or case reports, or if they involved pregnant participants,  
37  
38 critically ill patients, or provided insufficient data to allow for risk estimates to be calculated.  
39  
40  
41  
42  
43  
44  
45  
46  
47  
48 Any disagreement was reviewed by a third reviewer and resolved by consensus.  
49  
50  
51  
52

### 53 *Data extraction*

54  
55  
56 Detailed data from selected studies were extracted independently by two reviewers using  
57  
58 a standardized form independently. Data about study and participants characteristics,  
59  
60

1  
2  
3  
4 including year of study, sample size, time of enrollment, geographical location, endpoints  
5  
6 of study, and follow-up duration, were collected. Any discrepancies were reviewed by a  
7  
8 third reviewer and resolved by consensus. The quality of included studies was evaluated  
9  
10 by Newcastle-Ottawa scale using prespecified items comprised of patients' selection  
11  
12 (representativeness and selection of patients, ascertainment of exposure), comparability  
13  
14 of cohorts based on design or analysis, and outcome (assessment of outcomes, adequacy  
15  
16 of follow-up).<sup>9</sup> A quality score (0–9 **points**) was generated according to a maximum of 1  
17  
18  
19  
20  
21  
22 **point** for each item.

#### 23 24 25 26 27 *Patient and public involvement*

28  
29  
30 Due to the nature of the systematic review and meta-analysis, this study did not involve  
31  
32 patients and the public in the design, or conduct, or reporting or dissemination plans.  
33  
34

#### 35 36 37 *Statistical analysis*

38  
39  
40 The risk ratios (RRs) and 95% confidence interval (CI) were primarily used to represent  
41  
42 the effect of sex differences on mortality after STEMI. And data were combined using  
43  
44 random-effects model of DerSimonian and Laird with inverse variance weighting. Random-  
45  
46 effect model was used due to substantial clinical and statistical heterogeneity. Following  
47  
48 analyses were performed: i) unadjusted RRs for short- and long-term all-cause mortality  
49  
50 using raw number of death and total participants at risk for death specific to each sex, ii)  
51  
52 adjusted RRs for short- and long-term all-cause mortality using adjusted RRs **if they were**  
53  
54 described in **those** included studies. **In terms of short-term mortality, the RRs for in-hospital**  
55  
56  
57  
58  
59  
60

1  
2  
3  
4 and 30-day mortality were also calculated respectively.  
5

6 We assess heterogeneity across studies with Cochran's Q test and I2 test, with  $P < 0.1$  or  
7  
8 I2  $> 50\%$  considered significant. We also performed meta-regression to identify the  
9  
10 potential sources of heterogeneity in the included studies. The potential sources were  
11  
12 differences in diabetes, hypertension, hyperlipidemia, smoking, prior MI, and prior PCI.  
13  
14 Furthermore, stratified analysis was conducted as well by dividing the included studies into  
15  
16 different subgroups based on the Newcastle-Ottawa scale scores ( $> 7$  points or  $\leq 7$  points)  
17  
18 to assess the potential sources of heterogeneity. To assess the potential effect of  
19  
20 publication bias, we inspected funnel plots for asymmetry and used the Egger's regression  
21  
22 asymmetry test in which  $P < 0.05$  was considered to indicate significant publication bias.  
23  
24 Sensitivity analyses was conducted by excluding one study at a time and comparing the  
25  
26 results with the complete one. In addition, we also performed sensitivity analyses by  
27  
28 restricting to high-quality studies with a Newcastle-Ottawa scale of 5 points or more and  
29  
30 restricting to studies with sample size bigger than 1000 participants. All statistical analyses  
31  
32 were performed using STATA version 15.0 (Stata Corp, College Station, TX). Differences  
33  
34 were considered statistically significant at  $P < .05$  (2-sided).  
35  
36  
37  
38  
39  
40  
41  
42  
43  
44  
45  
46  
47

## 48 Results

### 49 50 51 52 53 *Literature search*

54  
55  
56 Study selection details were outlined in Figure 1. The literature search identified 2,611  
57  
58 potentially relevant articles. After screening based on title and abstract review, 2495  
59  
60

1  
2  
3  
4 records were excluded. A total of 116 full-text were finally assessed for eligibility, with 96  
5  
6 papers excluded due to enrollment starting earlier than a decade ago or no sufficient  
7  
8 gender specific data to analyze. Another 5 papers reviewed in detail were excluded after  
9  
10 due to data from the same cohorts. A total of 15 studies were finally included in the present  
11  
12 systematic review and meta-analysis.<sup>10-24</sup>  
13  
14  
15  
16  
17  
18  
19

### 20 *Study characteristics*

21  
22 Of the 15 included studies, 8 were multicenter studies and 4 studies enrolled more than  
23  
24 10,000 patients with STEMI. See Table 1 for further information of included studies.

25  
26  
27 Baseline characteristics of participants were missing in some included studies, but all  
28  
29 included studies provided sufficient data for analysis of sex differences in clinical outcomes.  
30  
31

32  
33 Except for 1 study, which was a prespecified gender analysis of randomized controlled  
34  
35 trial, the remaining 14 were observational studies. Among the 10 included studies which  
36  
37 reported adjusted analyses, most studied adjusted for age, diabetes mellitus, hypertension,  
38  
39 and prior myocardial infarction/PCI, while some adjusted for renal insufficiency,  
40  
41 and prior myocardial infarction/PCI, while some adjusted for renal insufficiency,  
42  
43 cardiogenic shock, cardiac arrest at admission and occurrence time of symptom onset.  
44  
45

46  
47 Variables that were adjusted in the adjusted analyses from the included studies were  
48  
49 presented in eTable 1 of the Supplementary Material. Results of assessment of study  
50  
51 quality using Newcastle-Ottawa scale were shown in eTable 2 in the Supplementary  
52  
53 Material.  
54  
55  
56  
57

### 58 *Patient characteristics*

59  
60

1  
2  
3  
4 A total of 128,585 patients with STEMI (31,706 [24.7%] female and 96,879 [75.3%] male)  
5  
6 were involved in the 15 included studies. Female tended to be older and had higher  
7  
8 prevalence of diabetes mellitus in all included studies. And in most studies, other important  
9  
10 comorbidities, including hypertension and hyperlipidemia, were more frequent in female.  
11  
12 Greater proportions of male were smokers and had prior PCI or myocardial infarction.  
13  
14 Besides, some studies reported that door-to-balloon time and symptom onset to balloon  
15  
16 time were longer in female than male. Part of patient baseline characteristics were  
17  
18 summarized in Table 2.  
19  
20  
21  
22  
23  
24  
25  
26  
27

#### 28 *Short-term all-cause mortality*

29  
30 Thirteen studies reported sex-specific unadjusted short-term mortality (7 studies with 30-  
31  
32 day mortality and 6 studies with in-hospital mortality) of patients with STEMI. There were  
33  
34 2,873 of 31,409 (9.1%) cases of all-cause mortality in female compared with 4,380 of  
35  
36 95,610 (4.6%) in male. Female were at a significantly higher risk of short-term mortality  
37  
38 (RR, 1.73; 95%CI, 1.53-1.96, P<0.001, I<sup>2</sup>=77%) compared with male (Figure 2 A). Nine  
39  
40 studies involving 119,379 patients reported adjusted short-term mortality specific to sex. In  
41  
42 adjusted analysis, the association between female and higher risk of short-term mortality  
43  
44 remained significant (RR, 1.24; 95%CI, 1.11-1.38, P<0.001, I<sup>2</sup>=39.6%) (Figure 2 B).  
45  
46 However, the strength of association calculated with adjusted RRs from these 9 studies  
47  
48 was attenuated.  
49  
50  
51  
52  
53

54  
55 Subgroup analysis demonstrated that the results of studies with Newcastle-Ottawa  
56  
57 scale >7 points (RR, 1.90; 95%CI, 1.73-2.09, P=0.018, I<sup>2</sup>=63.4%) and studies with ≤7  
58  
59  
60

1  
2  
3  
4 points (RR, 1.52; 95%CI, 1.20-1.93, P=0.026, I<sup>2</sup>=58.1%) were consistent in unadjusted  
5  
6 short-term mortality (See eFigure 1 in the Supplementary Material). The impact of sex on  
7  
8 in-hospital (RR, 1.71; 95%CI, 1.27-2.31, P<.001, I<sup>2</sup>=86.4%) and 30-day mortality (RR, 1.81;  
9  
10 95%CI, 1.62-2.02, P<.001, I<sup>2</sup>=56.6%) were consistent. The meta-analysis performed in  
11  
12 studies of patients undergoing PCI for STEMI also showed increased unadjusted mortality  
13  
14 (RR, 1.45; 95%CI, 1.05-2.00, P=0.026, I<sup>2</sup>=39.5%) in female patients.  
15  
16  
17  
18  
19  
20  
21

### 22 *Long-term all-cause mortality*

23  
24 Six studies involved 18,018 patients with STEMI (4,191 female and 13,827 male) and  
25  
26 followed up for more than 1 year, and reported all-cause mortality for female and male.  
27  
28 The incidence of long-term all-cause mortality was 13.9% (n=584) in female and 8.7%  
29  
30 (n=1202) in male. In unadjusted analysis, no significant sex difference was found in long-  
31  
32 term mortality (RR, 1.23; 95%CI, 0.89-1.69, P=0.206, I<sup>2</sup>=77.5%) (Figure 3 A). The  
33  
34 unadjusted long-term mortality was also similar between female and male patients  
35  
36 undergoing PCI (RR, 1.28; 95%CI, 0.95-1.73, P=0.108, I<sup>2</sup>=0.0%). And the adjusted  
37  
38 analysis of the pooled results from four studies, also showed a similar risk of mortality at  
39  
40 long-term follow-up in female compared with male (RR, 1.11; 95%CI, 0.42-1.80, P=0.670,  
41  
42 I<sup>2</sup>=74.5%) (Figure 3 B).  
43  
44  
45  
46  
47  
48  
49  
50  
51  
52

### 53 *Meta-Regression Analysis, sensitivity analyses and publication bias*

54  
55 According to meta-regression analysis, differences in prevalence of diabetes ( $\beta$  coefficient,  
56  
57 0.248; P=0.337; adjusted R<sup>2</sup>=1.31%; I<sup>2</sup>=80.86%;  $\tau^2$ =0.044), hypertension ( $\beta$  coefficient, -  
58  
59  
60

1  
2  
3  
4 0.255; P=0.538; adjusted R<sup>2</sup>=24.22%; I<sup>2</sup>=41.04%; τ<sup>2</sup>=0.008), hyperlipidemia(β coefficient,  
5  
6 0.260; P=0.415; adjusted R<sup>2</sup>=-1.84%; I<sup>2</sup>=83.59%; τ<sup>2</sup>=0.050), smoking ( β coefficient, -  
7  
8 0.040; P=0.255; adjusted R<sup>2</sup>=17.86%; I<sup>2</sup>=79.41%; τ<sup>2</sup>=0.045), prior MI ( β coefficient, -  
9  
10 2.725; P=0.126; adjusted R<sup>2</sup>=60.30%; I<sup>2</sup>=60.19%; τ<sup>2</sup>=0.032), and prior PCI (β coefficient,  
11  
12 0.109; P=0.896; adjusted R<sup>2</sup>=-58.31%; I<sup>2</sup>=61.73%; τ<sup>2</sup>=0.042) between sexes were not  
13  
14 identified as significant sources of heterogeneity for short-term all-cause mortality. Given  
15  
16 that not all included study provided information on confounders stratified by sex, the results  
17  
18 of meta-regression analyses should be interpreted with caution.  
19  
20  
21  
22  
23

24  
25 Sensitivity analysis by excluding one study at a time (See eFigure 2 in the Supplementary  
26  
27 Material) or restricted to data from studies with sample size bigger than 1000 (RR, 1.75;  
28  
29 95%CI, 1.54-1.99, P<.001, I<sup>2</sup>=82.9%) both indicated that none of the studies affected the  
30  
31 results of short-term mortality in this meta-analysis significantly. In analysis for long-term  
32  
33 mortality, sensitivity analysis showed a possibly higher influence on the result attribute to  
34  
35 the study of Tai et al (See eFigure 3 in the Supplementary Material). After removing this  
36  
37 study from meta-analysis, the association of female with increased long-term mortality  
38  
39 became significant (RR, 1.50; 95%CI, 1.23-1.83, P<.001, I<sup>2</sup>=40.9%). We found no  
40  
41 evidence of publication bias across studies based on visual inspection of funnel plots (See  
42  
43 eFigure 4 in the Supplementary Material) and the results from Egger's tests for short-term  
44  
45 mortality (P=0.462) and for long-term mortality (P=0.053).  
46  
47  
48  
49  
50  
51  
52  
53  
54  
55

## 56 Discussion:

57  
58  
59  
60

1  
2  
3  
4 Our systematic review and meta-analysis of contemporary literature on sex differences  
5  
6 among patients with STEMI demonstrate that **female** have a higher risk of short- but not  
7  
8 long-term mortality compared with **male** with STEMI. Furthermore, after adjustment for  
9  
10 baseline cardiovascular risk factors and clinical profiles, the sex differences in short-term  
11  
12 mortality are attenuated but remain significant, while **female** have the similar long-term  
13  
14 mortality with **male**.  
15  
16  
17  
18  
19  
20  
21

22 Our results are somewhat in accordance with several previously published meta-analysis.<sup>2</sup>

23  
24 <sup>25</sup> A considerable number of studies have consistently suggested that women were at a  
25  
26 higher risk of short-term mortality after ACS. However, whether risk of long-term mortality  
27  
28 is also higher in women with ACS remains under debate. Some studies indicated that  
29  
30 women with STEMI had a higher 1-year rate of death compared to men<sup>26</sup>, while the 1-year  
31  
32 mortality rate was conversely lower in women than men in some other studies<sup>23 24</sup>. In our  
33  
34 study, with respect to short-term mortality, the analyses of studies with high or low quality,  
35  
36 and big or small sample size yielded similar results. However, in terms of long-term  
37  
38 mortality, caution is needed when interpreting our finding of non-significant increased long-  
39  
40 term mortality in adjusted analyses, due to the results of sensitivity analysis which showed  
41  
42 a significant association between female and increased long-term mortality after removing  
43  
44 one study from adjusted analyses.  
45  
46  
47  
48  
49  
50  
51  
52  
53  
54  
55

56 It is widely accepted that there are significant differences in outcomes of women and men  
57  
58 with acute myocardial infarction. In our study, after adjusted for participants' baseline  
59  
60



1  
2  
3  
4 cardiovascular risk factors and clinical profiles, the strength of association between gender  
5  
6 and short-term mortality was substantially attenuated, which suggested that poorer  
7  
8 baseline cardiovascular risk profile partially explained the impact of sex differences on  
9  
10 mortality. Multiple studies have shown that women with STEMI present at older age and  
11  
12 have a higher burden of comorbidities, contributing to the sex differences in mortality after  
13  
14 STEMI.<sup>27</sup> All studies included in our meta-analysis demonstrate that female patients are  
15  
16 older and with more diabetes mellitus as well as hypertension. In addition, some sex-  
17  
18 specific studies found that certain risk factors and comorbidities were more potent in  
19  
20 women.<sup>28</sup> Diabetes mellitus, hypertension and smoking status are more strongly  
21  
22 associated with increased risk of cardiac events in women compared with men.<sup>27 29</sup>  
23  
24  
25  
26  
27  
28  
29  
30  
31

32 Notably, that these differences mentioned above still could not completely explain the gap  
33  
34 in mortality between sexes. It has been proved that women with acute myocardial infarction  
35  
36 were less likely to be treated with guideline directed medical therapy and less likely to  
37  
38 receive primary reperfusion therapy including primary percutaneous coronary intervention  
39  
40 or fibrinolysis.<sup>30</sup> Regarding medical therapy, numerous studies conducted around the world  
41  
42 consistently demonstrate female survivors are receiving less optimal medical therapy after  
43  
44 acute myocardial infarction during hospitalization or at discharge.<sup>31 32</sup> Though there might  
45  
46 be no differences in treatment adherence between men and women, some studies report  
47  
48 significant sex disparities in initiation of appropriate pharmacotherapy after myocardial  
49  
50 infarction.<sup>33</sup> Results from these observational studies have shown women are receiving  
51  
52 less optimal medical therapy including aspirin, statins, and angiotensin-converting enzyme  
53  
54  
55  
56  
57  
58  
59  
60

1  
2  
3  
4 inhibitors in all age groups, especially young women, and suggested that clinicians and  
5  
6 patients may benefit from better education and awareness of undertreatment of younger  
7  
8 women.<sup>33 34</sup>  
9  
10

11  
12  
13  
14 Lower rates of revascularization are observed among women with STEMI compared with  
15  
16 men in several studies despite proven benefit of this therapy.<sup>35</sup> Moreover, the sex  
17  
18 differences might be driven by delays in presentation to hospital and women with STEMI  
19  
20 were more likely to experience longer delays than men. Although a great improvement in  
21  
22 emergency medical services and timely revascularization over the past decades, recent  
23  
24 studies show that women with STEMI still present later and have a longer ischemic time  
25  
26 than men. Previous studies have shown consistently that women have longer door-to  
27  
28 balloon times and longer door-to needle times.<sup>36 37</sup> In addition, women are also more likely  
29  
30 to exhibit longer pre-hospital delays in seeking medical care after the development of  
31  
32 symptoms suggestive of myocardial infarction. Although there have been significant  
33  
34 reductions in patient and system delay in the last decade, women continue to have longer  
35  
36 presentation and treatment times.<sup>38</sup> Sex differences also exist in clinical presentation of  
37  
38 STEMI. Although chest pain was the most common ACS symptom in both sexes, women  
39  
40 were more likely to present without chest pain than men.<sup>39 40</sup> Lower rates of typical chest  
41  
42 pain reported among women with STEMI may also influence provider decision-making to  
43  
44 pursue less aggressive care including invasive revascularization.  
45  
46  
47  
48  
49  
50  
51  
52  
53  
54

55  
56  
57  
58 **Some included studies of our meta-analysis enrolled STEMI patients in general<sup>14-16</sup>, while**  
59  
60

1  
2  
3  
4 some others enrolled patients undergoing PCI for STEMI<sup>11 13 18</sup>. The different prognosis of  
5  
6 patients receiving reperfusion therapy or no-reperfusion therapy might be a potential  
7  
8 source of heterogeneity of our study. Nevertheless, our results are completely consistent  
9  
10 with a previous meta-analysis from Pancholy et al., which investigated sex differences in  
11  
12 mortality among patients with STEMI treated with primary PCI.<sup>2</sup> Its results demonstrated  
13  
14 that, when adjusted RRs were used, the increased risk for 1-year mortality in women was  
15  
16 no longer significant and the risk of in-hospital mortality still significantly elevated. It should  
17  
18 be noted that more than 50% of patients were treated with PCI in the most study conducted  
19  
20 among the general STEMI patients and included by our analysis, even more than 90% in  
21  
22 some included studies.<sup>12 24</sup> The increasing rate of primary PCI in recent years might be a  
23  
24 reason for the consistency of our findings and previous studies conducted specifically  
25  
26 among STEMI patients undergoing PCI  
27  
28  
29  
30  
31  
32  
33  
34  
35  
36  
37

38 Complications including bleeding, heart failure and mechanical complications are more  
39  
40 likely to develop in women with acute myocardial infarction and increase the risk of  
41  
42 mortality.<sup>14 41 42</sup> Bleeding secondary to antithrombotic therapies and invasive procedures is  
43  
44 more frequent in women.<sup>43</sup> Three included studies reported incidence of bleeding following  
45  
46 STEMI and they all found that women were at higher risk of bleeding.<sup>10 13 18</sup> One study  
47  
48 included in our analysis examined the relationships among sex, acute heart failure, and  
49  
50 related outcomes after STEMI.<sup>14</sup> Its results demonstrate that women are at higher risk to  
51  
52 develop de novo heart failure after STEMI and women with de novo heart failure have  
53  
54 worse survival compared with man. However, we could not compare the incidence of these  
55  
56  
57  
58  
59  
60

1  
2  
3  
4 complications due to the lack of sufficient data. Mechanical complications requiring surgical  
5  
6 intervention are also much more common in women after acute myocardial infarction and  
7  
8 associated with high mortality rates.<sup>44</sup>  
9  
10

11  
12  
13 Several limitations of this meta-analysis should be considered. First, the included studies  
14  
15 are all observational studies except one post hoc analysis of randomized controlled trial.  
16  
17 Hence, there may be residual confounding bias inherent in the observational study design  
18  
19 in our meta-analysis. Second, in adjusted analysis, not all included studies adjusted for the  
20  
21 same confounders and not all studies reported adjusted RRs. **The confounders which were**  
22  
23 **adjusted in the included studies might differ greatly across studies.** Third, there was  
24  
25 substantial heterogeneity in our meta-analysis, which could partly be attributed to the wide  
26  
27 variability in the sample sizes, locations, and treatment regimens across included studies.  
28  
29 **Additionally, although we calculated adjusted RRs for all-cause mortality, it needed to be**  
30  
31 **noted that relevant confounders might have differed across studies.** Fourth, the analysis of  
32  
33 long-term mortality, especially the adjusted analysis, included far fewer studies compared  
34  
35 with analysis of short-term mortality. Hence, there might be significant bias in the results  
36  
37 about long-term mortality.  
38  
39  
40  
41  
42  
43  
44  
45  
46  
47  
48  
49

50  
51 In conclusion, our meta-analysis, pooling data from contemporary literature, shows that  
52  
53 women with STENI have a higher risk of short-term mortality but not long-term mortality.  
54  
55 The effect of sex differences on mortality in patients with STEMI remain significant after  
56  
57 adjustment for baseline cardiovascular risk factors and clinical profiles, suggesting that  
58  
59  
60

1  
2  
3  
4 public awareness of increased risk and further improvements in management in women  
5  
6 with STEMI are necessary.  
7  
8  
9

## 10 11 **Other Information:**

### 12 13 **Contribution statement**

14  
15  
16  
17  
18  
19 Ziwei Xi: Study concepts, Study design, Literature research, Statistical analysis,  
20  
21  
22 Manuscript preparation, Manuscript editing. Tingting Guo and Yong Wang: Data  
23  
24  
25 acquisition, Data analysis/interpretation. J<sup>a</sup>nan Li, Yang Li, Jianfeng Zheng and Runlin  
26  
27  
28 Gao: Manuscript revision/review. Hong Qiu: Manuscript final version approval.  
29  
30  
31

### 32 33 **Conflict of interest**

34  
35 The authors declare that there is no conflict of interest.  
36  
37  
38  
39

### 40 41 **Funding**

42  
43 This research received no specific grant from any funding agency in the public, commercial,  
44  
45  
46 or not-for-profit sectors.  
47  
48  
49

### 50 51 **Ethics approval**

52  
53 The institutional central committee at Fuwai Hospital approved that the study protocol and  
54  
55  
56 inform consent was not required for a systematic review and meta-analysis.  
57  
58  
59  
60

#### Data sharing statement

As this is a systematic review and meta-analysis, the data used in the study have already been published by the authors of the included studies. All data relevant to the study are included in the article or uploaded as supplementary information.

For peer review only

Table 1 Characteristics of included studies.

| First Author | Year | Region       | Study design | Data source             | Multicenter | Time of enrollment      | Number of STEMI patients | Female          | Endpoint                                                          | Follow-up  |
|--------------|------|--------------|--------------|-------------------------|-------------|-------------------------|--------------------------|-----------------|-------------------------------------------------------------------|------------|
| Venetsanos   | 2017 | 13 countries | Prospective  | Clinical registry       | Yes         | Sep, 2011-<br>Oct, 2013 | 1,862                    | 369<br>(20.0)   | Major adverse cardiovascular events and definite stent thrombosis | 30 d       |
| Ali          | 2018 | Germany      | Prospective  | Administrative database | No          | 2013-2017               | 312                      | 101<br>(32.4)   | All-cause in-hospital mortality                                   | NA         |
| Langabeer    | 2018 | US           | Prospective  | Clinical registry       | Yes         | Jan, 2010-<br>Dec, 2015 | 9,674                    | 2,569<br>(26.6) | In-hospital mortality                                             | NA         |
| Tang         | 2018 | China        | Prospective  | Administrative database | No          | Jan, 2013-<br>Dec, 2013 | 1,238                    | 210 (1.9)       | Major adverse cardiac and cerebrovascular events                  | 730 ± 30 d |

|    |                  |      |           |               |               |     |             |        |           |                          |         |
|----|------------------|------|-----------|---------------|---------------|-----|-------------|--------|-----------|--------------------------|---------|
| 1  | <b>Cenko</b>     | 2019 | 12        | Prospective   | Clinical      | Yes | Jan, 2010-  | 10,443 | 3,112     | 30-day all-cause         | 30 d    |
| 2  |                  |      | Europea   |               | registry      |     | Jul, 2018   |        | (29.8)    | mortality                |         |
| 3  |                  |      | n         |               |               |     |             |        |           |                          |         |
| 4  |                  |      | countries |               |               |     |             |        |           |                          |         |
| 5  |                  |      |           |               |               |     |             |        |           |                          |         |
| 6  |                  |      |           |               |               |     |             |        |           |                          |         |
| 7  |                  |      |           |               |               |     |             |        |           |                          |         |
| 8  |                  |      |           |               |               |     |             |        |           |                          |         |
| 9  |                  |      |           |               |               |     |             |        |           |                          |         |
| 10 |                  |      |           |               |               |     |             |        |           |                          |         |
| 11 | <b>Hao</b>       | 2019 | China     | Prospective   | Clinical      | Yes | Nov, 2014-  | 50,203 | 11,016    | In-hospital mortality    | NA      |
| 12 |                  |      |           |               | registry      |     | Jun, 2018   |        | (21,9)    |                          |         |
| 13 |                  |      |           |               |               |     |             |        |           |                          |         |
| 14 |                  |      |           |               |               |     |             |        |           |                          |         |
| 15 |                  |      |           |               |               |     |             |        |           |                          |         |
| 16 |                  |      |           |               |               |     |             |        |           |                          |         |
| 17 | <b>Hannan</b>    | 2019 | US        | Retrospective | Administrativ | Yes | Jan, 2013-  | 23,809 | 7,791     | In hospital/30-day       | 30 d    |
| 18 |                  |      |           |               | e database    |     | Dec, 2015   |        | (32.7)    | mortality                |         |
| 19 |                  |      |           |               |               |     |             |        |           |                          |         |
| 20 |                  |      |           |               |               |     |             |        |           |                          |         |
| 21 |                  |      |           |               |               |     |             |        |           |                          |         |
| 22 | <b>Maznyczka</b> | 2019 | UK        | Retrospective | Clinical      | No  | July, 2011- | 324    | 87 (26.9) | All-cause death/ first   | 5 years |
| 23 |                  |      |           |               | registry      |     | Nov, 2012   |        |           | heart failure            |         |
| 24 |                  |      |           |               |               |     |             |        |           | hospitalization          |         |
| 25 |                  |      |           |               |               |     |             |        |           |                          |         |
| 26 |                  |      |           |               |               |     |             |        |           |                          |         |
| 27 |                  |      |           |               |               |     |             |        |           |                          |         |
| 28 |                  |      |           |               |               |     |             |        |           |                          |         |
| 29 |                  |      |           |               |               |     |             |        |           |                          |         |
| 30 | <b>Stehli</b>    | 2019 | Australia | Prospective   | Clinical      | Yes | 2013-2016   | 6,431  | 1,317     | In hospital/30-day major | 30 d    |
| 31 |                  |      |           |               | registry      |     |             |        | (20.5)    | adverse events, and      |         |
| 32 |                  |      |           |               |               |     |             |        |           | major bleeding           |         |
| 33 |                  |      |           |               |               |     |             |        |           |                          |         |
| 34 |                  |      |           |               |               |     |             |        |           |                          |         |
| 35 |                  |      |           |               |               |     |             |        |           |                          |         |
| 36 |                  |      |           |               |               |     |             |        |           |                          |         |
| 37 |                  |      |           |               |               |     |             |        |           |                          |         |
| 38 | <b>Burgess</b>   | 2020 | Australia | Prospective   | Administrativ | No  | Dec, 2010-  | 589    | 123 (21)  | Cardiac death and        | 2 years |
| 39 |                  |      |           |               |               |     |             |        |           |                          |         |



|                 |      |                 |               |                             |     |                         |        |                 |                                      |                    |
|-----------------|------|-----------------|---------------|-----------------------------|-----|-------------------------|--------|-----------------|--------------------------------------|--------------------|
|                 |      |                 |               | e database                  |     | Apr, 2014               |        |                 | myocardial infarction                |                    |
| <b>Dharma</b>   | 2020 | Indonesi<br>a   | Retrospective | Administrativ<br>e database | No  | Feb, 2011-<br>Aug, 2019 | 6,557  | 929<br>(14.2)   | All-cause mortality                  | 30 d and 1<br>year |
| <b>Kerkmanx</b> | 2020 | Netherla<br>nds | Retrospective | Administrativ<br>e database | Yes | 2015-2016               | 787    | 229 (29)        | All-cause mortality                  | 1 year             |
| <b>Siabani</b>  | 2020 | Iran            | Prospective   | Clinical<br>registry        | No  | Jun, 2016-<br>May, 2018 | 1,484  | 311(21)         | In-hospital mortality                | NA                 |
| <b>Tai</b>      | 2020 | China           | Retrospective | Administrativ<br>e database | No  | Jan, 2013-<br>Dec, 2017 | 182    | 56 (30.8)       | In hospital/1-year<br>mortality      | 1 year             |
| <b>Tizón</b>    | 2020 | Spain           | Prospective   | Clinical<br>registry        | Yes | 2010-2016               | 14,690 | 3,486<br>(23.7) | 30-day/1-year all-cause<br>mortality | 1 year             |

Table 2 Baseline characteristics of participants in included studies.

| First | Year | Age, mean (SD), | Diabete | Hypertensio | Hyperlipidemi | Smokin | Prior | Prior |
|-------|------|-----------------|---------|-------------|---------------|--------|-------|-------|
|-------|------|-----------------|---------|-------------|---------------|--------|-------|-------|

| Author     | years | s, n (%)    |             | n, n (%)   |              | a, n (%)     |            | g, n (%)     |              | MI, n (%)  |              | PCI, n (%) |              |           |            |
|------------|-------|-------------|-------------|------------|--------------|--------------|------------|--------------|--------------|------------|--------------|------------|--------------|-----------|------------|
|            |       | Female      | Male        | Female     | Male         | Female       | Male       | Female       | Male         | Female     | Male         | Female     | Male         |           |            |
| Venetsanos | 2017  | 69 (13.0)   | 59 (11.0)   | 48 (13.0)  | 205 (13.7)   | 190 (51.5)   | 605 (40.5) | 117 (31.7)   | 536 (35.9)   | NA         | NA           | 24 (6.5)   | 135 (9.0)    | 16 (4.3)  | 124 (8.3)  |
| Ali        | 2018  | NA          | NA          | NA         | NA           | NA           | NA         | NA           | NA           | NA         | NA           | NA         | NA           | NA        | NA         |
| Langabeer  | 2018  | 62.5 (13.6) | 60.2 (12.5) | 759 (29.6) | 1,975 (27.8) | NA           | NA         | 1,265 (49.3) | 3,693 (52.0) | 951 (37.0) | 2,763 (38.9) | 435 (16.9) | 1,304 (18.4) | NA        | NA         |
| Tang       | 2018  | 64.5 (9.3)  | 54.4 (10.7) | 66 (31.4)  | 311 (25.1)   | 141 (67.1)   | 659 (53.3) | 125 (59.5)   | 749 (60.3)   | 33 (15.7)  | 957 (77.3)   | 10 (4.8)   | 83 (6.7)     | 60 (28.6) | 282 (22.8) |
| Cenko      | 2019  | 66.1        | 59.7        | 925        | 1,531        | 2,322 (74.6) | 4,502      | 1,353 (43.3) | 3,100        | 1,010      | 3,714        | 301        | 842          | 306       | 762        |

|                 |      |         |           |         |       |           |       |               |       |        |       |         |       |        |       |
|-----------------|------|---------|-----------|---------|-------|-----------|-------|---------------|-------|--------|-------|---------|-------|--------|-------|
|                 |      | (11.7)  | (11.7)    | (29.7)  | (20.9 |           | (61.4 |               | (42.3 | (32.5) | (50.7 | (9.7)   | (11.5 | (9.8)  | (10.4 |
|                 |      |         |           | )       | )     |           | )     |               | )     |        | )     |         | )     |        | )     |
| <b>Hao</b>      | 2019 | 69.0    | 61.1      | 10,141  | 24,08 | 15,607    | 38,42 | 17,996 (85.4) | 50,94 | 1,719  | 32,37 | NA      | NA    | NA     | NA    |
|                 |      | (10.6)  | (12.4)    | (48.1)  | 2     | (74.1)    | 6     |               | 4     | (8.2)  | 7     |         |       |        |       |
|                 |      |         |           |         | (39.4 |           | (62.9 |               | (83.3 |        | (53.0 |         |       |        |       |
|                 |      |         |           | )       | )     |           | )     |               | )     |        | )     |         |       |        |       |
| <b>Hannan</b>   | 2019 | 70.72   | 62.11     | NA      | NA    | NA        | NA    | NA            | NA    | NA     | NA    | NA      | NA    | 868    | 2206  |
|                 |      | (14.73) | (12.82)   |         |       |           |       |               |       |        |       |         |       | (11.1) | (13.8 |
|                 |      |         |           |         |       |           |       |               |       |        |       |         |       | )      | )     |
| <b>Maznyczk</b> | 2019 | 61.2    | 58.6(11.2 | 8 (9.2) | 26    | 32 (36.8) | 73    | 28 (32.2)     | 66    | 57     | 139   | 5 (5.7) | 20    | 2      | 16    |
| <b>a</b>        |      | (12.2)  | )         |         | (11.0 |           | (30.8 |               | (27.8 | (65.5) | (58.6 |         | (8.4) | (2.3)  | (6.8) |
|                 |      |         |           |         | )     |           | )     |               | )     |        | )     |         |       |        |       |
| <b>Stehli</b>   | 2019 | 66.5    | 60.8      | 245     | 770   | NA        | NA    | NA            | NA    | NA     | NA    | NA      | NA    | 104    | 577   |
|                 |      | (13.2)  | (12.2)    | (18.6)  | (15.1 |           |       |               |       |        |       |         |       | (7.9)  | (11.3 |
|                 |      |         |           |         | )     |           |       |               |       |        |       |         |       |        | )     |

|    |                 |      |         |         |        |       |            |       |            |       |          |       |         |        |       |    |
|----|-----------------|------|---------|---------|--------|-------|------------|-------|------------|-------|----------|-------|---------|--------|-------|----|
| 1  | <b>Burgess</b>  | 2020 | 62.7    | 58.2    | 39     | 88    | 84 (68.3)  | 243   | 83 (67.5)  | 253   | 64       | 252   | 9 (7.3) | 41     | NA    | NA |
| 2  |                 |      | (52.7-  | (50.6-  | (31.7) | (18.9 | (52.1      | (52.3 | (52.0)     | (54.1 | (8.8)    |       |         |        |       |    |
| 3  |                 |      | 73.2)   | 65.7)   | )      | )     | )          | )     | )          | )     |          |       |         |        |       |    |
| 4  |                 |      |         |         |        |       |            |       |            |       |          |       |         |        |       |    |
| 5  |                 |      |         |         |        |       |            |       |            |       |          |       |         |        |       |    |
| 6  |                 |      |         |         |        |       |            |       |            |       |          |       |         |        |       |    |
| 7  |                 |      |         |         |        |       |            |       |            |       |          |       |         |        |       |    |
| 8  |                 |      |         |         |        |       |            |       |            |       |          |       |         |        |       |    |
| 9  | <b>Dharma</b>   | 2020 | 60 (10) | 55 (10) | 403    | 1548  | 647 (69.6) | 2,889 | 299 (32.2) | 1,779 | 109      | 4,049 | NA      | NA     | NA    | NA |
| 10 |                 |      |         |         | (43.4) | (27.5 | (51.3      | (31.6 | (11.7)     | (71.9 |          |       |         |        |       |    |
| 11 |                 |      |         |         | )      | )     | )          | )     | )          | )     |          |       |         |        |       |    |
| 12 |                 |      |         |         |        |       |            |       |            |       |          |       |         |        |       |    |
| 13 |                 |      |         |         |        |       |            |       |            |       |          |       |         |        |       |    |
| 14 |                 |      |         |         |        |       |            |       |            |       |          |       |         |        |       |    |
| 15 |                 |      |         |         |        |       |            |       |            |       |          |       |         |        |       |    |
| 16 |                 |      |         |         |        |       |            |       |            |       |          |       |         |        |       |    |
| 17 | <b>Kerkmanx</b> | 2020 | 68 (14) | 61 (12) | 39     | 66    | 101 (45.7) | 178   | 56 (25.9)  | 110   | 88       | 258   | 30      | 79     | 33    | 77 |
| 18 |                 |      |         |         | (17.6) | (12.5 | (33.6      | (21.0 | (41.1)     | (49.3 | (13.6)   | (13.7 | (14.4)  | (14.2  |       |    |
| 19 |                 |      |         |         | )      | )     | )          | )     | )          | )     | )        | )     | )       | )      |       |    |
| 20 |                 |      |         |         |        |       |            |       |            |       |          |       |         |        |       |    |
| 21 |                 |      |         |         |        |       |            |       |            |       |          |       |         |        |       |    |
| 22 |                 |      |         |         |        |       |            |       |            |       |          |       |         |        |       |    |
| 23 |                 |      |         |         |        |       |            |       |            |       |          |       |         |        |       |    |
| 24 | <b>Siabani</b>  | 2020 | 65.8    | 59.0    | 114    | 187   | 195 (63.7) | 410   | 110 (36.7) | 208   | 41       | 655   | NA      | NA     | NA    | NA |
| 25 |                 |      | (11.3)  | (12.4)  | (37.7) | (16.2 | (35.4      | (18.5 | (13.2)     | (55.9 |          |       |         |        |       |    |
| 26 |                 |      |         |         | )      | )     | )          | )     | )          | )     |          |       |         |        |       |    |
| 27 |                 |      |         |         |        |       |            |       |            |       |          |       |         |        |       |    |
| 28 |                 |      |         |         |        |       |            |       |            |       |          |       |         |        |       |    |
| 29 |                 |      |         |         |        |       |            |       |            |       |          |       |         |        |       |    |
| 30 |                 |      |         |         |        |       |            |       |            |       |          |       |         |        |       |    |
| 31 |                 |      |         |         |        |       |            |       |            |       |          |       |         |        |       |    |
| 32 | <b>Tai</b>      | 2020 | 78 (76- | 78 (76- | 96     | 116   | 217 (79.5) | 319   | NA         | NA    | 14 (5.4) | 239   | NA      | NA     | 36    | 78 |
| 33 |                 |      | 81)     | 80)     | (35.2) | (26.5 | (72.8      |       |            |       | (56.5    |       |         | (13.5) | (18.1 |    |
| 34 |                 |      |         |         | )      | )     | )          |       |            |       | )        |       |         |        | )     |    |
| 35 |                 |      |         |         |        |       |            |       |            |       |          |       |         |        |       |    |
| 36 |                 |      |         |         |        |       |            |       |            |       |          |       |         |        |       |    |
| 37 |                 |      |         |         |        |       |            |       |            |       |          |       |         |        |       |    |
| 38 |                 |      |         |         |        |       |            |       |            |       |          |       |         |        |       |    |
| 39 |                 |      |         |         |        |       |            |       |            |       |          |       |         |        |       |    |
| 40 |                 |      |         |         |        |       |            |       |            |       |          |       |         |        |       |    |
| 41 |                 |      |         |         |        |       |            |       |            |       |          |       |         |        |       |    |
| 42 |                 |      |         |         |        |       |            |       |            |       |          |       |         |        |       |    |
| 43 |                 |      |         |         |        |       |            |       |            |       |          |       |         |        |       |    |
| 44 |                 |      |         |         |        |       |            |       |            |       |          |       |         |        |       |    |
| 45 |                 |      |         |         |        |       |            |       |            |       |          |       |         |        |       |    |
| 46 |                 |      |         |         |        |       |            |       |            |       |          |       |         |        |       |    |

|    |              |      |        |        |        |       |              |       |            |       |        |       |    |    |    |    |
|----|--------------|------|--------|--------|--------|-------|--------------|-------|------------|-------|--------|-------|----|----|----|----|
| 1  | <b>Tizón</b> | 2020 | 69.9   | 60.9   | 844    | 1,927 | 1,192 (34.2) | 2,722 | 878 (25.2) | 2,375 | 474    | 2,711 | NA | NA | NA | NA |
| 2  |              |      |        |        |        |       |              |       |            |       |        |       |    |    |    |    |
| 3  |              |      |        |        |        |       |              |       |            |       |        |       |    |    |    |    |
| 4  |              |      | (13.7) | (12.6) | (24.2) | (17.2 |              | (24.3 |            | (21.2 | (13.6) | (24.2 |    |    |    |    |
| 5  |              |      |        |        |        |       |              |       |            |       |        |       |    |    |    |    |
| 6  |              |      |        |        |        | )     |              | )     |            | )     |        | )     |    |    |    |    |
| 7  |              |      |        |        |        |       |              |       |            |       |        |       |    |    |    |    |
| 8  |              |      |        |        |        |       |              |       |            |       |        |       |    |    |    |    |
| 9  |              |      |        |        |        |       |              |       |            |       |        |       |    |    |    |    |
| 10 |              |      |        |        |        |       |              |       |            |       |        |       |    |    |    |    |
| 11 |              |      |        |        |        |       |              |       |            |       |        |       |    |    |    |    |
| 12 |              |      |        |        |        |       |              |       |            |       |        |       |    |    |    |    |
| 13 |              |      |        |        |        |       |              |       |            |       |        |       |    |    |    |    |
| 14 |              |      |        |        |        |       |              |       |            |       |        |       |    |    |    |    |
| 15 |              |      |        |        |        |       |              |       |            |       |        |       |    |    |    |    |
| 16 |              |      |        |        |        |       |              |       |            |       |        |       |    |    |    |    |
| 17 |              |      |        |        |        |       |              |       |            |       |        |       |    |    |    |    |
| 18 |              |      |        |        |        |       |              |       |            |       |        |       |    |    |    |    |
| 19 |              |      |        |        |        |       |              |       |            |       |        |       |    |    |    |    |
| 20 |              |      |        |        |        |       |              |       |            |       |        |       |    |    |    |    |
| 21 |              |      |        |        |        |       |              |       |            |       |        |       |    |    |    |    |
| 22 |              |      |        |        |        |       |              |       |            |       |        |       |    |    |    |    |
| 23 |              |      |        |        |        |       |              |       |            |       |        |       |    |    |    |    |
| 24 |              |      |        |        |        |       |              |       |            |       |        |       |    |    |    |    |
| 25 |              |      |        |        |        |       |              |       |            |       |        |       |    |    |    |    |
| 26 |              |      |        |        |        |       |              |       |            |       |        |       |    |    |    |    |
| 27 |              |      |        |        |        |       |              |       |            |       |        |       |    |    |    |    |
| 28 |              |      |        |        |        |       |              |       |            |       |        |       |    |    |    |    |
| 29 |              |      |        |        |        |       |              |       |            |       |        |       |    |    |    |    |
| 30 |              |      |        |        |        |       |              |       |            |       |        |       |    |    |    |    |
| 31 |              |      |        |        |        |       |              |       |            |       |        |       |    |    |    |    |
| 32 |              |      |        |        |        |       |              |       |            |       |        |       |    |    |    |    |
| 33 |              |      |        |        |        |       |              |       |            |       |        |       |    |    |    |    |
| 34 |              |      |        |        |        |       |              |       |            |       |        |       |    |    |    |    |
| 35 |              |      |        |        |        |       |              |       |            |       |        |       |    |    |    |    |
| 36 |              |      |        |        |        |       |              |       |            |       |        |       |    |    |    |    |
| 37 |              |      |        |        |        |       |              |       |            |       |        |       |    |    |    |    |
| 38 |              |      |        |        |        |       |              |       |            |       |        |       |    |    |    |    |
| 39 |              |      |        |        |        |       |              |       |            |       |        |       |    |    |    |    |
| 40 |              |      |        |        |        |       |              |       |            |       |        |       |    |    |    |    |
| 41 |              |      |        |        |        |       |              |       |            |       |        |       |    |    |    |    |
| 42 |              |      |        |        |        |       |              |       |            |       |        |       |    |    |    |    |
| 43 |              |      |        |        |        |       |              |       |            |       |        |       |    |    |    |    |
| 44 |              |      |        |        |        |       |              |       |            |       |        |       |    |    |    |    |
| 45 |              |      |        |        |        |       |              |       |            |       |        |       |    |    |    |    |
| 46 |              |      |        |        |        |       |              |       |            |       |        |       |    |    |    |    |

For peer review only

## Reference:

1. Virani SS, Alonso A, Benjamin EJ, et al. Heart Disease and Stroke Statistics-2020 Update: A Report From the American Heart Association. *Circulation* 2020;141(9):e139-e596. doi: 10.1161/cir.0000000000000757 [published Online First: 2020/01/30]
2. Pancholy SB, Shantha GP, Patel T, et al. Sex differences in short-term and long-term all-cause mortality among patients with ST-segment elevation myocardial infarction treated by primary percutaneous intervention: a meta-analysis. *JAMA internal medicine* 2014;174(11):1822-30. doi: 10.1001/jamainternmed.2014.4762 [published Online First: 2014/09/30]
3. Wenger NK, Arnold A, Bairey Merz CN, et al. Hypertension Across a Woman's Life Cycle. *Journal of the American College of Cardiology* 2018;71(16):1797-813. doi: 10.1016/j.jacc.2018.02.033 [published Online First: 2018/04/21]
4. Peters SAE, Woodward M. Sex Differences in the Burden and Complications of Diabetes. *Current diabetes reports* 2018;18(6):33. doi: 10.1007/s11892-018-1005-5 [published Online First: 2018/04/20]
5. Huded CP, Johnson M, Kravitz K, et al. 4-Step Protocol for Disparities in STEMI Care and Outcomes in Women. *Journal of the American College of Cardiology* 2018;71(19):2122-32. doi: 10.1016/j.jacc.2018.02.039 [published Online First: 2018/03/15]
6. Mehta LS, Beckie TM, DeVon HA, et al. Acute Myocardial Infarction in Women: A Scientific Statement From the American Heart Association. *Circulation* 2016;133(9):916-47. doi: 10.1161/cir.0000000000000351 [published Online First: 2016/01/27]

- 1  
2  
3  
4 7. Reed GW, Rossi JE, Cannon CP. Acute myocardial infarction. *Lancet (London, England)*  
5  
6 2017;389(10065):197-210. doi: 10.1016/s0140-6736(16)30677-8 [published Online  
7  
8 First: 2016/08/10]  
9  
10  
11 8. Moher D, Liberati A, Tetzlaff J, et al. Preferred reporting items for systematic reviews and  
12  
13 meta-analyses: the PRISMA statement. *BMJ (Clinical research ed)* 2009;339:b2535.  
14  
15 doi: 10.1136/bmj.b2535 [published Online First: 2009/07/23]  
16  
17  
18 9. Stang A. Critical evaluation of the Newcastle-Ottawa scale for the assessment of the quality  
19  
20 of nonrandomized studies in meta-analyses. *European journal of epidemiology*  
21  
22 2010;25(9):603-5. doi: 10.1007/s10654-010-9491-z [published Online First:  
23  
24 2010/07/24]  
25  
26  
27 10. Venetsanos D, Sederholm Lawesson S, Alfredsson J, et al. Association between gender  
28  
29 and short-term outcome in patients with ST elevation myocardial infraction participating  
30  
31 in the international, prospective, randomised Administration of Ticagrelor in the  
32  
33 catheterisation Laboratory or in the Ambulance for New ST elevation myocardial  
34  
35 Infarction to open the Coronary artery (ATLANTIC) trial: a prespecified analysis. *BMJ*  
36  
37 *open* 2017;7(9):e015241. doi: 10.1136/bmjopen-2016-015241 [published Online First:  
38  
39 2017/09/25]  
40  
41  
42 11. Ali M, Lange SA, Wittlinger T, et al. In-hospital mortality after acute STEMI in patients  
43  
44 undergoing primary PCI. *Herz* 2018;43(8):741-45. doi: 10.1007/s00059-017-4621-y  
45  
46 [published Online First: 2017/10/11]  
47  
48  
49 12. Langabeer JR, 2nd, Henry TD, Fowler R, et al. Sex-Based Differences in Discharge  
50  
51 Disposition and Outcomes for ST-Segment Elevation Myocardial Infarction Patients  
52  
53  
54  
55  
56  
57  
58  
59  
60

- 1  
2  
3  
4 Within a Regional Network. *Journal of women's health (2002)* 2018;27(8):1001-06. doi:  
5  
6 10.1089/jwh.2017.6553 [published Online First: 2018/01/11]  
7  
8  
9 13. Tang XF, Song Y, Xu JJ, et al. Effect of sex difference in clinical presentation (stable  
10  
11 coronary artery disease vs unstable angina pectoris or non-ST-elevation myocardial  
12  
13 infarction vs ST-elevation myocardial infarction) on 2-year outcomes in patients  
14  
15 undergoing percutaneous coronary intervention. *Journal of interventional cardiology*  
16  
17 2018;31(1):5-14. doi: 10.1111/joic.12451 [published Online First: 2017/10/13]  
18  
19  
20  
21  
22 14. Cenko E, van der Schaar M, Yoon J, et al. Sex-Related Differences in Heart Failure After  
23  
24 ST-Segment Elevation Myocardial Infarction. *Journal of the American College of*  
25  
26 *Cardiology* 2019;74(19):2379-89. doi: 10.1016/j.jacc.2019.08.1047 [published Online  
27  
28 First: 2019/11/09]  
29  
30  
31  
32 15. Hao Y, Liu J, Liu J, et al. Sex Differences in In-Hospital Management and Outcomes of  
33  
34 Patients With Acute Coronary Syndrome. *Circulation* 2019;139(15):1776-85. doi:  
35  
36 10.1161/circulationaha.118.037655 [published Online First: 2019/01/23]  
37  
38  
39  
40 16. Hannan EL, Wu Y, Tamis-Holland J, et al. Sex differences in the treatment and outcomes  
41  
42 of patients hospitalized with ST-elevation myocardial infarction. *Catheterization and*  
43  
44 *cardiovascular interventions : official journal of the Society for Cardiac Angiography &*  
45  
46 *Interventions* 2020;95(2):196-204. doi: 10.1002/ccd.28286 [published Online First:  
47  
48 2019/04/24]  
49  
50  
51  
52 17. Maznyczka AM, Carrick D, Carberry J, et al. Sex-based associations with microvascular  
53  
54 injury and outcomes after ST-segment elevation myocardial infarction. *Open heart*  
55  
56 2019;6(1):e000979. doi: 10.1136/openhrt-2018-000979 [published Online First:  
57  
58  
59  
60



- 1  
2  
3  
4 2019/06/07]
- 5  
6  
7 18. Stehli J, Martin C, Brennan A, et al. Sex Differences Persist in Time to Presentation,  
8  
9 Revascularization, and Mortality in Myocardial Infarction Treated With Percutaneous  
10  
11 Coronary Intervention. *Journal of the American Heart Association* 2019;8(10):e012161.  
12  
13 doi: 10.1161/jaha.119.012161 [published Online First: 2019/05/17]  
14  
15  
16  
17 19. Burgess SN, Juergens CP, Nguyen TL, et al. Comparison of Late Cardiac Death and  
18  
19 Myocardial Infarction Rates in Women Vs Men With ST-Elevation Myocardial Infarction.  
20  
21 *The American journal of cardiology* 2020;128:120-26. doi:  
22  
23 10.1016/j.amjcard.2020.04.044 [published Online First: 2020/07/12]  
24  
25  
26  
27 20. Dharma S, Dakota I, Andriantoro H, et al. Association of gender with clinical outcomes of  
28  
29 patients with acute ST-segment elevation myocardial infarction presenting with acute  
30  
31 heart failure. *Coronary artery disease* 2020 doi: 10.1097/mca.0000000000000892  
32  
33 [published Online First: 2020/04/26]  
34  
35  
36  
37 21. Kerkman T, Ten Brinke LBG, Huybrechts B, et al. Evaluation of sex differences in patients  
38  
39 with ST-elevated myocardial infarction: an observational cohort study in Amsterdam  
40  
41 and surrounding region. *Netherlands heart journal : monthly journal of the Netherlands*  
42  
43 *Society of Cardiology and the Netherlands Heart Foundation* 2020;28(11):595-603. doi:  
44  
45 10.1007/s12471-020-01435-9 [published Online First: 2020/06/13]  
46  
47  
48  
49 22. Siabani S, Davidson PM, Babakhani M, et al. Gender-based difference in early mortality  
50  
51 among patients with ST-segment elevation myocardial infarction: insights from  
52  
53 Kermanshah STEMI Registry. *Journal of cardiovascular and thoracic research*  
54  
55 2020;12(1):63-68. doi: 10.34172/jcvtr.2020.10 [published Online First: 2020/03/27]  
56  
57  
58  
59  
60

- 1  
2  
3  
4 23. Tai S, Li X, Yang H, et al. Sex Differences in the Outcomes of Elderly Patients with Acute  
5  
6 Coronary Syndrome. *Cardiology research and practice* 2020;2020:5091490. doi:  
7  
8 10.1155/2020/5091490 [published Online First: 2020/05/27]  
9  
10  
11 24. Tizón-Marcos H, Vaquerizo B, Marrugat J, et al. Differences in 30-day complications and  
12  
13 1-year mortality by sex in patients with a first STEMI managed by the Codi IAM network  
14  
15 between 2010 and 2016. *Revista española de cardiología (English ed)* 2020 doi:  
16  
17 10.1016/j.rec.2020.06.002 [published Online First: 2020/07/15]  
18  
19  
20 25. Bavishi C, Bangalore S, Patel D, et al. Short and long-term mortality in women and men  
21  
22 undergoing primary angioplasty: A comprehensive meta-analysis. *International journal*  
23  
24 *of cardiology* 2015;198:123-30. doi: 10.1016/j.ijcard.2015.07.001 [published Online  
25  
26 First: 2015/07/15]  
27  
28  
29 26. Kosmidou I, Redfors B, Selker HP, et al. Infarct size, left ventricular function, and prognosis  
30  
31 in women compared to men after primary percutaneous coronary intervention in ST-  
32  
33 segment elevation myocardial infarction: results from an individual patient-level pooled  
34  
35 analysis of 10 randomized trials. *European heart journal* 2017;38(21):1656-63. doi:  
36  
37 10.1093/eurheartj/ehx159 [published Online First: 2017/04/14]  
38  
39  
40 27. Millett ERC, Peters SAE, Woodward M. Sex differences in risk factors for myocardial  
41  
42 infarction: cohort study of UK Biobank participants. *BMJ (Clinical research ed)*  
43  
44 2018;363:k4247. doi: 10.1136/bmj.k4247 [published Online First: 2018/11/09]  
45  
46  
47 28. Yusuf S, Hawken S, Ounpuu S, et al. Effect of potentially modifiable risk factors associated  
48  
49 with myocardial infarction in 52 countries (the INTERHEART study): case-control study.  
50  
51 *Lancet (London, England)* 2004;364(9438):937-52. doi: 10.1016/s0140-  
52  
53  
54  
55  
56  
57  
58  
59  
60

- 1  
2  
3  
4 6736(04)17018-9 [published Online First: 2004/09/15]  
5  
6  
7 29. Harreiter J, Fadl H, Kautzky-Willer A, et al. Do Women with Diabetes Need More Intensive  
8  
9 Action for Cardiovascular Reduction than Men with Diabetes? *Current diabetes reports*  
10  
11 2020;20(11):61. doi: 10.1007/s11892-020-01348-2 [published Online First: 2020/10/10]  
12  
13  
14 30. Arora S, Stouffer GA, Kucharska-Newton AM, et al. Twenty Year Trends and Sex  
15  
16 Differences in Young Adults Hospitalized With Acute Myocardial Infarction. *Circulation*  
17  
18 2019;139(8):1047-56. doi: 10.1161/circulationaha.118.037137 [published Online First:  
19  
20 2018/12/28]  
21  
22  
23  
24 31. Zhao M, Woodward M, Vaartjes I, et al. Sex Differences in Cardiovascular Medication  
25  
26 Prescription in Primary Care: A Systematic Review and Meta-Analysis. *Journal of the*  
27  
28 *American Heart Association* 2020;9(11):e014742. doi: 10.1161/jaha.119.014742  
29  
30 [published Online First: 2020/05/21]  
31  
32  
33  
34 32. Eindhoven DC, Hilt AD, Zwaan TC, et al. Age and gender differences in medical adherence  
35  
36 after myocardial infarction: Women do not receive optimal treatment - The Netherlands  
37  
38 claims database. *European journal of preventive cardiology* 2018;25(2):181-89. doi:  
39  
40 10.1177/2047487317744363 [published Online First: 2017/11/23]  
41  
42  
43  
44 33. Smolina K, Ball L, Humphries KH, et al. Sex Disparities in Post-Acute Myocardial Infarction  
45  
46 Pharmacologic Treatment Initiation and Adherence: Problem for Young Women.  
47  
48 *Circulation Cardiovascular quality and outcomes* 2015;8(6):586-92. doi:  
49  
50 10.1161/circoutcomes.115.001987 [published Online First: 2015/10/16]  
51  
52  
53  
54 34. Nguyen HL, Goldberg RJ, Gore JM, et al. Age and sex differences, and changing trends,  
55  
56 in the use of evidence-based therapies in acute coronary syndromes: perspectives  
57  
58  
59  
60

- 1  
2  
3  
4 from a multinational registry. *Coronary artery disease* 2010;21(6):336-44. doi:  
5  
6 10.1097/MCA.0b013e32833ce07c [published Online First: 2010/07/28]  
7  
8  
9 35. Pelletier R, Humphries KH, Shimony A, et al. Sex-related differences in access to care  
10  
11 among patients with premature acute coronary syndrome. *CMAJ : Canadian Medical*  
12  
13 *Association journal = journal de l'Association medicale canadienne* 2014;186(7):497-  
14  
15 504. doi: 10.1503/cmaj.131450 [published Online First: 2014/03/19]  
16  
17  
18 36. Murphy AC, Yudi MB, Farouque O, et al. Impact of Gender and Door-to-Balloon Times on  
19  
20 Long-Term Mortality in Patients Presenting With ST-Elevation Myocardial Infarction.  
21  
22 *The American journal of cardiology* 2019;124(6):833-41. doi:  
23  
24 10.1016/j.amjcard.2019.06.008 [published Online First: 2019/07/23]  
25  
26  
27 37. D'Onofrio G, Safdar B, Lichtman JH, et al. Sex differences in reperfusion in young patients  
28  
29 with ST-segment-elevation myocardial infarction: results from the VIRGO study.  
30  
31 *Circulation* 2015;131(15):1324-32. doi: 10.1161/circulationaha.114.012293 [published  
32  
33 Online First: 2015/03/21]  
34  
35  
36 38. Bugiardini R, Ricci B, Cenko E, et al. Delayed Care and Mortality Among Women and Men  
37  
38 With Myocardial Infarction. *Journal of the American Heart Association* 2017;6(8) doi:  
39  
40 10.1161/jaha.117.005968 [published Online First: 2017/09/02]  
41  
42  
43 39. Khan NA, Daskalopoulou SS, Karp I, et al. Sex differences in acute coronary syndrome  
44  
45 symptom presentation in young patients. *JAMA internal medicine* 2013;173(20):1863-  
46  
47 71. doi: 10.1001/jamainternmed.2013.10149 [published Online First: 2013/09/18]  
48  
49  
50 40. Canto JG, Rogers WJ, Goldberg RJ, et al. Association of age and sex with myocardial  
51  
52 infarction symptom presentation and in-hospital mortality. *Jama* 2012;307(8):813-22.  
53  
54  
55  
56  
57  
58  
59  
60

1  
2  
3  
4 doi: 10.1001/jama.2012.199 [published Online First: 2012/02/24]  
5

6  
7 41. Moscucci M, Fox KA, Cannon CP, et al. Predictors of major bleeding in acute coronary  
8  
9 syndromes: the Global Registry of Acute Coronary Events (GRACE). *European heart*  
10  
11 *journal* 2003;24(20):1815-23. doi: 10.1016/s0195-668x(03)00485-8 [published Online  
12  
13  
14 First: 2003/10/18]  
15

16  
17 42. Kolte D, Khera S, Aronow WS, et al. Trends in incidence, management, and outcomes of  
18  
19 cardiogenic shock complicating ST-elevation myocardial infarction in the United States.  
20  
21 *Journal of the American Heart Association* 2014;3(1):e000590. doi:  
22  
23 10.1161/jaha.113.000590 [published Online First: 2014/01/15]  
24  
25

26  
27 43. Nanna MG, Hajduk AM, Krumholz HM, et al. Sex-Based Differences in Presentation,  
28  
29 Treatment, and Complications Among Older Adults Hospitalized for Acute Myocardial  
30  
31 Infarction: The SILVER-AMI Study. *Circulation Cardiovascular quality and outcomes*  
32  
33 2019;12(10):e005691. doi: 10.1161/circoutcomes.119.005691 [published Online First:  
34  
35 2019/10/15]  
36  
37

38  
39 44. Elbadawi A, Elgendy IY, Mahmoud K, et al. Temporal Trends and Outcomes of Mechanical  
40  
41 Complications in Patients With Acute Myocardial Infarction. *JACC Cardiovascular*  
42  
43 *interventions* 2019;12(18):1825-36. doi: 10.1016/j.jcin.2019.04.039 [published Online  
44  
45  
46 First: 2019/09/21]  
47  
48  
49  
50  
51  
52  
53  
54  
55  
56  
57  
58  
59  
60

1  
2  
3  
4 Figure 1 Flowchart of selection of studies included in meta-analysis.  
5  
6  
7  
8

9 Figure 2 Forest plots of relative risks of short-term all-cause mortality among women and  
10 men with ST-segment elevation myocardial infarction.  
11  
12

13 Forest plots showing unadjusted (A) and adjusted (B) short-term all-cause mortality of  
14 women compared with men with ST-segment elevation myocardial infarction using  
15 random-effects model.  
16  
17  
18  
19  
20  
21  
22  
23  
24

25 Figure 3 Forest plots of relative risks of long-term all-cause mortality among women and  
26 men with ST-segment elevation myocardial infarction.  
27  
28

29 Forest plots showing unadjusted (A) and adjusted (B) long-term all-cause mortality of  
30 women compared with men with ST-segment elevation myocardial infarction using  
31 random-effects model.  
32  
33  
34  
35  
36  
37  
38  
39  
40  
41  
42  
43  
44  
45  
46  
47  
48  
49  
50  
51  
52  
53  
54  
55  
56  
57  
58  
59  
60

# BMJ Open

## Contemporary sex differences in mortality among patients with ST-segment elevation myocardial infarction: a systematic review and meta-analysis

|                                 |                                                                                                                                                                                                                                                                                                                                                                                                                                                                                                                                                                                                 |
|---------------------------------|-------------------------------------------------------------------------------------------------------------------------------------------------------------------------------------------------------------------------------------------------------------------------------------------------------------------------------------------------------------------------------------------------------------------------------------------------------------------------------------------------------------------------------------------------------------------------------------------------|
| Journal:                        | <i>BMJ Open</i>                                                                                                                                                                                                                                                                                                                                                                                                                                                                                                                                                                                 |
| Manuscript ID                   | bmjopen-2021-053379.R3                                                                                                                                                                                                                                                                                                                                                                                                                                                                                                                                                                          |
| Article Type:                   | Original research                                                                                                                                                                                                                                                                                                                                                                                                                                                                                                                                                                               |
| Date Submitted by the Author:   | 06-Dec-2021                                                                                                                                                                                                                                                                                                                                                                                                                                                                                                                                                                                     |
| Complete List of Authors:       | Xi, Ziwei; Fuwai Hospital State Key Laboratory of Cardiovascular Disease<br>Qiu, Hong; Fuwai Hospital State Key Laboratory of Cardiovascular Disease<br>Guo, Tingting; Fuwai Hospital State Key Laboratory of Cardiovascular Disease<br>Wang, Yong; Fuwai Hospital State Key Laboratory of Cardiovascular Disease<br>Li, Jianan; Beijing Tiantan Hospital<br>Li, Yang; Fuwai Hospital State Key Laboratory of Cardiovascular Disease<br>Zheng, Jianfeng; Fuwai Hospital State Key Laboratory of Cardiovascular Disease<br>Gao, R; Fuwai Hospital State Key Laboratory of Cardiovascular Disease |
| <b>Primary Subject Heading</b>: | Epidemiology                                                                                                                                                                                                                                                                                                                                                                                                                                                                                                                                                                                    |
| Secondary Subject Heading:      | Emergency medicine                                                                                                                                                                                                                                                                                                                                                                                                                                                                                                                                                                              |
| Keywords:                       | EPIDEMIOLOGY, Coronary heart disease < CARDIOLOGY, Myocardial infarction < CARDIOLOGY                                                                                                                                                                                                                                                                                                                                                                                                                                                                                                           |
|                                 |                                                                                                                                                                                                                                                                                                                                                                                                                                                                                                                                                                                                 |

SCHOLARONE™  
Manuscripts



I, the Submitting Author has the right to grant and does grant on behalf of all authors of the Work (as defined in the below author licence), an exclusive licence and/or a non-exclusive licence for contributions from authors who are: i) UK Crown employees; ii) where BMJ has agreed a CC-BY licence shall apply, and/or iii) in accordance with the terms applicable for US Federal Government officers or employees acting as part of their official duties; on a worldwide, perpetual, irrevocable, royalty-free basis to BMJ Publishing Group Ltd ("BMJ") its licensees and where the relevant Journal is co-owned by BMJ to the co-owners of the Journal, to publish the Work in this journal and any other BMJ products and to exploit all rights, as set out in our [licence](#).

The Submitting Author accepts and understands that any supply made under these terms is made by BMJ to the Submitting Author unless you are acting as an employee on behalf of your employer or a postgraduate student of an affiliated institution which is paying any applicable article publishing charge ("APC") for Open Access articles. Where the Submitting Author wishes to make the Work available on an Open Access basis (and intends to pay the relevant APC), the terms of reuse of such Open Access shall be governed by a Creative Commons licence – details of these licences and which [Creative Commons](#) licence will apply to this Work are set out in our licence referred to above.

Other than as permitted in any relevant BMJ Author's Self Archiving Policies, I confirm this Work has not been accepted for publication elsewhere, is not being considered for publication elsewhere and does not duplicate material already published. I confirm all authors consent to publication of this Work and authorise the granting of this licence.



1  
2  
3  
4 **Contemporary sex differences in mortality among patients with ST-segment elevation**  
5 **myocardial infarction: a systematic review and meta-analysis**

6  
7 **Short title : Sex differences in STEMI**  
8

9  
10 **Authors:**

11  
12 Ziwei Xi<sup>1</sup>, Hong Qiu<sup>1</sup>, Tingting Guo<sup>2</sup>, Yong Wang<sup>1</sup>, Jianan Li<sup>3,1</sup>, Yang Li<sup>1</sup>, Jianfeng Zheng<sup>1</sup>,  
13  
14  
15 Runlin Gao<sup>1</sup>

16  
17 *1. Department of Cardiology, Coronary artery disease center, Fuwai Hospital, National*  
18  
19  
20  
21 *Center for Cardiovascular Diseases, Chinese Academy of Medical Sciences and Peking*  
22  
23 *Union Medical College, Beijing, China*

24  
25 *2. Thrombosis Center, National Center for Cardiovascular Diseases, State Key*  
26  
27  
28 *Laboratory of Cardiovascular Disease, Fuwai Hospital, Chinese Academy of Medical*  
29  
30  
31 *Sciences and Peking Union Medical College, Beijing, China*

32  
33 *3. Department of Cardiology and Macrovascular Disease, Beijing Tiantan Hospital,*  
34  
35  
36 *Capital Medical University, Beijing, China*

37  
38  
39  
40  
41 **Corresponding author:**

42  
43 Prof. Hong Qiu, M.D.

44  
45 E-mail address: qiu hong6780@sina.com

46  
47  
48  
49 Department and affiliation: Department of Cardiology, Coronary artery disease center,  
50  
51  
52 Fuwai Hospital, National Center for Cardiovascular Diseases, Chinese Academy of  
53  
54  
55 Medical Sciences and Peking Union Medical College, Beijing, China

56  
57 Telephone: 0016-13261179000

58  
59 Address: No.167 North Lishi Road, Xicheng District, Beijing, China  
60

1  
2  
3  
4 **Contemporary sex differences in mortality among patients with ST-segment elevation**  
5 **myocardial infarction: a systematic review and meta-analysis**  
6  
7  
8

9 **Objectives:** To assess the effect of sex differences on short- and long-term mortality among patients  
10 with ST-segment elevation myocardial infarction (STEMI).  
11  
12

13  
14  
15 **Design:** Systematic review and meta-analysis of contemporary available evidence.  
16  
17

18  
19 **Setting:** PubMed, Embase and Cochrane Library were searched for relevant studies reporting sex  
20 specific outcomes among patients with STEMI published between January 1, 2010 to August 1,  
21 2020. Risk ratio (RR) 95% confidence intervals (CIs) were measured using DerSimonian and  
22 Laird random-effects model. Sensitivity analyses were performed and publication bias was also  
23 checked. All statistical analyses were performed using STATA version 15.0.  
24  
25  
26  
27  
28

29  
30  
31 **Participants:** Studies providing data about short- or long-term mortality stratified by sex in patients  
32 with STEMI were included. Only study conducted in last ten years were included.  
33  
34

35  
36  
37 **Primary and secondary outcome measures:** The primary outcome was all-cause death at short-  
38 (in-hospital or 30 days) and long-term (at least 12 months) follow-up.  
39  
40

41  
42 **Results**  
43

44 A total of fifteen studies involving 128,585 patients (31,706 [24.7%] female and 96,879 [75.3%]  
45 male) were included. In the unadjusted analyses, female were at a higher risk of short-term mortality  
46 (RR, 1.73; 95%CI, 1.53-1.96, P<0.001, I<sup>2</sup>=77%) but not long-term mortality (RR, 1.23; 95%CI,  
47 0.89-1.69, P=0.206, I<sup>2</sup>=77.5%). When adjusted effect estimates from individual studies were used  
48 in meta-analysis, the association between female and higher risk of short-term mortality remained  
49 significant (RR, 1.24; 95%CI, 1.11-1.38, P<0.001, I<sup>2</sup>=39.6%). And adjusted long-term mortality  
50 was also similar between female and male (RR, 1.11; 95%CI, 0.42-1.80, P=0.670, I<sup>2</sup>=74.5%).  
51  
52  
53  
54  
55  
56  
57  
58  
59

60 **Conclusions**

1  
2  
3  
4 An increased short- but not long-term mortality was found in female with STEMI. After adjustment  
5  
6 for baseline cardiovascular risk factors and clinical profiles, short-term mortality remains higher in  
7  
8 female with STEMI compared to male, indicating the need for further improvements in management  
9  
10 in female patients.  
11  
12  
13  
14  
15  
16  
17  
18  
19  
20  
21  
22  
23  
24  
25  
26  
27  
28  
29  
30  
31  
32  
33  
34  
35  
36  
37  
38  
39  
40  
41  
42  
43  
44  
45  
46  
47  
48  
49  
50  
51  
52  
53  
54  
55  
56  
57  
58  
59  
60

For peer review only

**Strengths and limitations of this study**

- ♦ We assessed the contemporary effect of sex differences on mortality among patients with STEMI by meta-analysis of studies from the last decade.
- ♦ A greater number of potentially eligible articles were screened and the large sample size ensures adequate statistical power to detect even a small effect of interest.
- ♦ Sensitivity analyses by excluding one study at a time and restricting to studies with high quality or with large sample size got consistent results.
- ♦ Substantial and nonnegligible heterogeneity still exist in our meta-analysis and might result in potential bias.
- ♦ Residual confounding bias could not be totally excluded due to the observational study design of most included studies.

## Contemporary sex differences in mortality among patients with ST-segment elevation myocardial infarction: a systematic review and meta-analysis

### Introduction

Acute myocardial infarction remains one of leading causes of mortality in both men and women worldwide despite improvement of acute cardiac care.<sup>1</sup> Numerous studies have reported that women have a higher risk of in-hospital and long-term adverse outcomes following ST-segment elevation myocardial infarction (STEMI) compared with men.<sup>2</sup> Confounders including advanced age and more frequent comorbidities, such as hypertension and diabetes mellitus<sup>3 4</sup>, might contribute to excess mortality in women. Moreover, previous studies show lower rates of guideline directed medical therapy and revascularization are also associated with poorer prognosis for women with STEMI.<sup>5</sup>

Sex discrepancies in management and outcomes after STEMI have been increasingly reported in the literature and raised public awareness.<sup>6</sup> Major progress in therapy for myocardial infarction and primary and secondary preventive interventions has been made to reduce cardiovascular mortality for women.<sup>1 7</sup> And there have been marked reductions in cardiovascular disease mortality in women with acute myocardial infarction in the past two decades.<sup>1</sup> Conflicting results are noted in recent studies on sex differences following STEMI. It is unclear whether the sex differences still exist, in view of substantial improvements in prognosis of cardiovascular disease over the past decade.

In order to assess the contemporary effect of sex differences on short- and long-term mortality among patients with STEMI, we performed a systematic review and meta-analysis of all available evidence from last decade reporting sex-specific outcomes after STEMI.

### Methods

The present systematic review and meta-analysis was performed following the principle of the Preferred Reporting Items for Systematic Reviews and Meta-Analyses (PRISMA) statement.<sup>8</sup>

#### *Literature search*

1  
2  
3  
4 We conducted a comprehensive search of the PubMed, EMBASE, and Cochrane Library from  
5 January 1, 2010 to August 1, 2020 to identify studies from the last decade that described sex  
6 differences in in short- or long-term mortality among patients with STEMI. Both observational  
7 studies and randomized clinical trials were eligible. We queried MeSH and the abstract text for the  
8 following three search terms: gender part (including "gender", "female", "male", "gender  
9 differences", "sex differences" or "sex characteristics"); outcome part (including "death",  
10 "mortality", "hospital mortality", "cardiac death", "sudden cardiac death", "all-cause mortality",  
11 "long term mortality", "one year mortality", "cardiovascular mortality" or "short term mortality");  
12 myocardial infarction part (including "myocardial infarction", "acute myocardial infarction",  
13 "myocardial necrosis", "ST segment elevation myocardial infarction", "primary PCI", "primary  
14 percutaneous coronary intervention" or "primary angioplasty") to identify relevant studies. There  
15 was no language restriction or age limit. The full search strategies were presented in eTable 1 of the  
16 Supplementary Material.  
17  
18  
19  
20  
21  
22  
23  
24  
25  
26  
27  
28  
29  
30

### 31 *Study selection*

32 According to the aim of our analyses, studies were included in this systematic review if data about  
33 short- (in-hospital or 30 days) or long-term (at least 12 months) mortality stratified by sex in patients  
34 with STEMI were reported. Two reviewers identified studies eligible for further review by  
35 performing an initial screen of titles or abstracts of the search results. Subsequently, a second screen  
36 of full texts eligibility was performed by another two reviewers. Studies had to fulfil the following  
37 criteria to be included in the present analyses: i) studies reporting data on all-cause mortality specific  
38 to STEMI population; and ii) studies providing enough details to obtain numbers of events or  
39 incidence rates according to sex; and iii) enrollment starting not earlier than a decade ago. Editorials,  
40 letters, conference proceedings and abstracts were considered to be eligible only if sufficient  
41 information was available in abstracts or associated tables or figures. We excluded studies if they  
42 were review articles or case reports, or if they involved pregnant participants, critically ill patients,  
43 or provided insufficient data to allow for risk estimates to be calculated. Any disagreement was  
44 reviewed by a third reviewer and resolved by consensus.  
45  
46  
47  
48  
49  
50  
51  
52  
53  
54  
55  
56  
57  
58  
59  
60

### *Data extraction*

1  
2  
3  
4 Detailed data from selected studies were extracted independently by two reviewers using a  
5 standardized form independently. Data about study and participants characteristics, including year  
6 of study, sample size, time of enrollment, geographical location, endpoints of study, and follow-up  
7 duration, were collected. Any discrepancies were reviewed by a third reviewer and resolved by  
8 consensus. The quality of included studies was evaluated by Newcastle-Ottawa scale using  
9 prespecified items comprised of patients' selection (representativeness and selection of patients,  
10 ascertainment of exposure), comparability of cohorts based on design or analysis, and outcome  
11 (assessment of outcomes, adequacy of follow-up).<sup>9</sup> A quality score (0–9 points) was generated  
12 according to a maximum of 1 point for each item.  
13  
14  
15  
16  
17  
18  
19  
20  
21  
22

### 23 *Patient and public involvement*

24 Due to the nature of the systematic review and meta-analysis, this study did not involve patients and  
25 the public in the design, or conduct, or reporting or dissemination plans.  
26  
27  
28  
29  
30

### 31 *Statistical analysis*

32 The risk ratios (RRs) and 95% confidence interval (CI) were primarily used to represent the effect  
33 of sex differences on mortality after STEMI. And data were combined using random-effects model  
34 of DerSimonian and Laird with inverse variance weighting. Random-effect model was used due to  
35 substantial clinical and statistical heterogeneity. Following analyses were performed: i) unadjusted  
36 RRs for short- and long-term all-cause mortality using raw number of death and total participants  
37 at risk for death specific to each sex, ii) adjusted RRs for short- and long-term all-cause mortality  
38 using adjusted RRs if they were described in those included studies. In terms of short-term mortality,  
39 the RRs for in-hospital and 30-day mortality were also calculated respectively.  
40  
41  
42  
43  
44  
45  
46  
47

48 We assess heterogeneity across studies with Cochran's Q test and I<sup>2</sup> test, with P<0.1 or I<sup>2</sup> >50%  
49 considered significant. We also performed meta-regression to identify the potential sources of  
50 heterogeneity in the included studies. The potential sources were differences in diabetes,  
51 hypertension, hyperlipidemia, smoking, prior MI, and prior PCI. Furthermore, stratified analysis  
52 was conducted as well by dividing the included studies into different subgroups based on the  
53 Newcastle-Ottawa scale scores (>7 points or ≤7 points) to assess the potential sources of  
54 heterogeneity. To assess the potential effect of publication bias, we inspected funnel plots for  
55  
56  
57  
58  
59  
60

1  
2  
3  
4 asymmetry and used the Egger's regression asymmetry test in which  $P < 0.05$  was considered to  
5 indicate significant publication bias.

6  
7 Sensitivity analyses was conducted by excluding one study at a time and comparing the results with  
8 the complete one. In addition, we also performed sensitivity analyses by restricting to high-quality  
9 studies with a Newcastle-Ottawa scale of 5 points or more and restricting to studies with sample  
10 size bigger than 1000 participants. All statistical analyses were performed using STATA version  
11 15.0 (Stata Corp, College Station, TX). Differences were considered statistically significant at  $P$   
12  $< .05$  (2-sided).  
13  
14  
15  
16  
17  
18  
19

## 20 21 **Results**

### 22 23 24 25 *Literature search*

26  
27 Study selection details were outlined in Figure 1. The literature search identified 2,611 potentially  
28 relevant articles. After screening based on title and abstract review, 2495 records were excluded. A  
29 total of 116 full-text were finally assessed for eligibility, with 96 papers excluded due to enrollment  
30 starting earlier than a decade ago or no sufficient gender specific data to analyze. Another 5 papers  
31 reviewed in detail were excluded after due to data from the same cohorts. A total of 15 studies were  
32 finally included in the present systematic review and meta-analysis.<sup>10-24</sup>  
33  
34  
35  
36  
37  
38  
39

### 40 41 *Study characteristics*

42  
43 Of the 15 included studies, 8 were multicenter studies and 4 studies enrolled more than 10,000  
44 patients with STEMI. See Table 1 for further information of included studies. Baseline  
45 characteristics of participants were missing in some included studies, but all included studies  
46 provided sufficient data for analysis of sex differences in clinical outcomes. Except for 1 study,  
47 which was a prespecified gender analysis of randomized controlled trial, the remaining 14 were  
48 observational studies. Among the 10 included studies which reported adjusted analyses, most  
49 studied adjusted for age, diabetes mellitus, hypertension, and prior myocardial infarction/PCI, while  
50 some adjusted for renal insufficiency, cardiogenic shock, cardiac arrest at admission and occurrence  
51 time of symptom onset. Variables that were adjusted in the adjusted analyses from the included  
52 studies were presented in eTable 2 of the Supplementary Material. Results of assessment of study  
53  
54  
55  
56  
57  
58  
59  
60



1  
2  
3  
4 quality using Newcastle-Ottawa scale were shown in eTable 3 in the Supplementary Material.  
5  
6

#### 7 8 *Patient characteristics*

9 A total of 128,585 patients with STEMI (31,706 [24.7%] female and 96,879 [75.3%] male) were  
10 involved in the 15 included studies. Female tended to be older and had higher prevalence of diabetes  
11 mellitus in all included studies. And in most studies, other important comorbidities, including  
12 hypertension and hyperlipidemia, were more frequent in female. Greater proportions of male were  
13 smokers and had prior PCI or myocardial infarction. Besides, some studies reported that door-to-  
14 balloon time and symptom onset to balloon time were longer in female than male. Part of patient  
15 baseline characteristics were summarized in Table 2.  
16  
17  
18  
19  
20  
21  
22

#### 23 24 25 *Short-term all-cause mortality*

26 Thirteen studies reported sex-specific unadjusted short-term mortality (7 studies with 30-day  
27 mortality and 6 studies with in-hospital mortality) of patients with STEMI. There were 2,873 of  
28 31,409 (9.1%) cases of all-cause mortality in female compared with 4,380 of 95,610 (4.6%) in male.  
29 Female were at a significantly higher risk of short-term mortality (RR, 1.73; 95%CI, 1.53-1.96,  
30  $P<0.001$ ,  $I^2=77\%$ ) compared with male (Figure 2 A). Nine studies involving 119,379 patients  
31 reported adjusted short-term mortality specific to sex. In adjusted analysis, the association between  
32 female and higher risk of short-term mortality remained significant (RR, 1.24; 95%CI, 1.11-1.38,  
33  $P<0.001$ ,  $I^2=39.6\%$ ) (Figure 2 B). However, the strength of association calculated with adjusted RRs  
34 from these 9 studies was attenuated.  
35  
36  
37  
38  
39  
40  
41  
42  
43

44 Subgroup analysis demonstrated that the results of studies with Newcastle-Ottawa scale  $>7$  points  
45 (RR, 1.90; 95%CI, 1.73-2.09,  $P=0.018$ ,  $I^2=63.4\%$ ) and studies with  $\leq 7$  points (RR, 1.52; 95%CI,  
46 1.20-1.93,  $P=0.026$ ,  $I^2=58.1\%$ ) were consistent in unadjusted short-term mortality (See eFigure 1 in  
47 the Supplementary Material). The impact of sex on in-hospital (RR, 1.71; 95%CI, 1.27-2.31,  $P<0.001$ ,  
48  $I^2=86.4\%$ ) and 30-day mortality (RR, 1.81; 95%CI, 1.62-2.02,  $P<0.001$ ,  $I^2=56.6\%$ ) were consistent.  
49 The meta-analysis performed in studies of patients undergoing PCI for STEMI also showed  
50 increased unadjusted mortality (RR, 1.45; 95%CI, 1.05-2.00,  $P=0.026$ ,  $I^2=39.5\%$ ) in female patients.  
51  
52  
53  
54  
55  
56  
57  
58  
59

#### 60 *Long-term all-cause mortality*

1  
2  
3  
4 Six studies involved 18,018 patients with STEMI (4,191 female and 13,827 male) and followed up  
5 for more than 1 year, and reported all-cause mortality for female and male. The incidence of long-  
6 term all-cause mortality was 13.9% (n=584) in female and 8.7% (n=1202) in male. In unadjusted  
7 analysis, no significant sex difference was found in long-term mortality (RR, 1.23; 95%CI, 0.89-  
8 1.69, P=0.206, I<sup>2</sup>=77.5%) (Figure 3 A). The unadjusted long-term mortality was also similar  
9 between female and male patients undergoing PCI (RR, 1.28; 95%CI, 0.95-1.73, P=0.108, I<sup>2</sup>=0.0%).  
10 And the adjusted analysis of the pooled results from four studies, also showed a similar risk of  
11 mortality at long-term follow-up in female compared with male (RR, 1.11; 95%CI, 0.42-1.80,  
12 P=0.670, I<sup>2</sup>=74.5%) (Figure 3 B).

#### 23 *Meta-Regression Analysis, sensitivity analyses and publication bias*

24 According to meta-regression analysis, differences in prevalence of diabetes ( $\beta$  coefficient, 0.248;  
25 P=0.337; adjusted R<sup>2</sup>=1.31%; I<sup>2</sup>=80.86%;  $\tau^2$ =0.044), hypertension ( $\beta$  coefficient, -0.255; P=0.538;  
26 adjusted R<sup>2</sup>=24.22%; I<sup>2</sup>=41.04%;  $\tau^2$ =0.008), hyperlipidemia ( $\beta$  coefficient, 0.260; P=0.415;  
27 adjusted R<sup>2</sup>=-1.84%; I<sup>2</sup>=83.59%;  $\tau^2$ =0.050), smoking ( $\beta$  coefficient, -0.040; P=0.255; adjusted  
28 R<sup>2</sup>=17.86%; I<sup>2</sup>=79.41%;  $\tau^2$ =0.045), prior MI ( $\beta$  coefficient, -2.725; P=0.126; adjusted R<sup>2</sup>=60.30%;  
29 I<sup>2</sup>=60.19%;  $\tau^2$ =0.032), and prior PCI ( $\beta$  coefficient, 0.109; P=0.896; adjusted R<sup>2</sup>=-58.31%;  
30 I<sup>2</sup>=61.73%;  $\tau^2$ =0.042) between sexes were not identified as significant sources of heterogeneity for  
31 short-term all-cause mortality. Given that not all included study provided information on  
32 confounders stratified by sex, the results of meta-regression analyses should be interpreted with  
33 caution.

34 Sensitivity analysis by excluding one study at a time (See eFigure 2 in the Supplementary Material)  
35 or restricted to data from studies with sample size bigger than 1000 (RR, 1.75; 95%CI, 1.54-1.99,  
36 P<.001, I<sup>2</sup>=82.9%) both indicated that none of the studies affected the results of short-term mortality  
37 in this meta-analysis significantly. In analysis for long-term mortality, sensitivity analysis showed  
38 a possibly higher influence on the result attribute to the study of Tai et al (See eFigure 3 in the  
39 Supplementary Material). After removing this study from meta-analysis, the association of female  
40 with increased long-term mortality became significant (RR, 1.50; 95%CI, 1.23-1.83, P<.001,  
41 I<sup>2</sup>=40.9%). We found no evidence of publication bias across studies based on visual inspection of  
42 funnel plots (See eFigure 4 in the Supplementary Material) and the results from Egger's tests for  
43  
44  
45  
46  
47  
48  
49  
50  
51  
52  
53  
54  
55  
56  
57  
58  
59  
60

1  
2  
3 short-term mortality (P=0.462) and for long-term mortality (P=0.053).  
4  
5

6  
7 **Discussion:**  
8  
9

10  
11 Our systematic review and meta-analysis of contemporary literature on sex differences among  
12 patients with STEMI demonstrate that female have a higher risk of short- but not long-term mortality  
13 compared with male with STEMI. Furthermore, after adjustment for baseline cardiovascular risk  
14 factors and clinical profiles, the sex differences in short-term mortality are attenuated but remain  
15 significant, while female have the similar long-term mortality with male.  
16  
17  
18  
19  
20

21  
22  
23 Our results are somewhat in accordance with several previously published meta-analysis.<sup>2 25</sup> A  
24 considerable number of studies have consistently suggested that women were at a higher risk of  
25 short-term mortality after ACS. However, whether risk of long-term mortality is also higher in  
26 women with ACS remains under debate. Some studies indicated that women with STEMI had a  
27 higher 1-year rate of death compared to men<sup>26</sup>, while the 1-year mortality rate was conversely lower  
28 in women than men in some other studies<sup>23 24</sup>. In our study, with respect to short-term mortality, the  
29 analyses of studies with high or low quality, and big or small sample size yielded similar results.  
30  
31 However, in terms of long-term mortality, caution is needed when interpreting our finding of non-  
32 significant increased long-term mortality in adjusted analyses, due to the results of sensitivity  
33 analysis which showed a significant association between female and increased long-term mortality  
34 after removing one study from adjusted analyses.  
35  
36  
37  
38  
39  
40  
41  
42  
43  
44  
45

46 It is widely accepted that there are significant differences in outcomes of women and men with acute  
47 myocardial infarction. In our study, after adjusted for participants' baseline cardiovascular risk  
48 factors and clinical profiles, the strength of association between gender and short-term mortality  
49 was substantially attenuated, which suggested that poorer baseline cardiovascular risk profile  
50 partially explained the impact of sex differences on mortality. Multiple studies have shown that  
51 women with STEMI present at older age and have a higher burden of comorbidities, contributing to  
52 the sex differences in mortality after STEMI.<sup>27</sup> All studies included in our meta-analysis  
53 demonstrate that female patients are older and with more diabetes mellitus as well as hypertension.  
54  
55  
56  
57  
58  
59  
60

1  
2  
3  
4 In addition, some sex-specific studies found that certain risk factors and comorbidities were more  
5 potent in women.<sup>28</sup> Diabetes mellitus , hypertension and smoking status are more strongly  
6 associated with increased risk of cardiac events in women compared with men.<sup>27 29</sup>  
7  
8  
9

10  
11 Notably, that these differences mentioned above still could not completely explain the gap in  
12 mortality between sexes. It has been proved that women with acute myocardial infarction were less  
13 likely to be treated with guideline directed medical therapy and less likely to receive primary  
14 reperfusion therapy including primary percutaneous coronary intervention or fibrinolysis.<sup>30</sup>  
15 Regarding medical therapy, numerous studies conducted around the world consistently demonstrate  
16 female survivors are receiving less optimal medical therapy after acute myocardial infarction during  
17 hospitalization or at discharge.<sup>31 32</sup> Though there might be no differences in treatment adherence  
18 between men and women, some studies report significant sex disparities in initiation of appropriate  
19 pharmacotherapy after myocardial infarction.<sup>33</sup> Results from these observational studies have  
20 shown women are receiving less optimal medical therapy including aspirin, statins, and angiotensin-  
21 converting enzyme inhibitors in all age groups, especially young women, and suggested that  
22 clinicians and patients may benefit from better education and awareness of undertreatment of  
23 younger women.<sup>33 34</sup>  
24  
25  
26  
27  
28  
29  
30  
31  
32  
33  
34  
35  
36  
37  
38

39 Lower rates of revascularization are observed among women with STEMI compared with men in  
40 several studies despite proven benefit of this therapy.<sup>35</sup> Moreover, the sex differences might be  
41 driven by delays in presentation to hospital and women with STEMI were more likely to experience  
42 longer delays than men. Although a great improvement in emergency medical services and timely  
43 revascularization over the past decades, recent studies show that women with STEMI still present  
44 later and have a longer ischemic time than men. Previous studies have shown consistently that  
45 women have longer door-to balloon times and longer door-to needle times.<sup>36 37</sup> In addition, women  
46 are also more likely to exhibit longer pre-hospital delays in seeking medical care after the  
47 development of symptoms suggestive of myocardial infarction. Although there have been  
48 significant reductions in patient and system delay in the last decade, women continue to have longer  
49 presentation and treatment times.<sup>38</sup> Sex differences also exist in clinical presentation of STEMI.  
50 Although chest pain was the most common ACS symptom in both sexes, women were more likely  
51  
52  
53  
54  
55  
56  
57  
58  
59  
60

1  
2  
3  
4 to present without chest pain than men.<sup>39 40</sup> Lower rates of typical chest pain reported among women  
5  
6 with STEMI may also influence provider decision-making to pursue less aggressive care including  
7  
8 invasive revascularization.  
9

10  
11 Some included studies of our meta-analysis enrolled STEMI patients in general<sup>14-16</sup>, while some  
12  
13 others enrolled patients undergoing PCI for STEMI<sup>11 13 18</sup>. The different prognosis of patients  
14  
15 receiving reperfusion therapy or no-reperfusion therapy might be a potential source of heterogeneity  
16  
17 of our study. Nevertheless, our results are completely consistent with a previous meta-analysis from  
18  
19 Pancholy et al., which investigated sex differences in mortality among patients with STEMI treated  
20  
21 with primary PCI.<sup>2</sup> Its results demonstrated that, when adjusted RRs were used, the increased risk  
22  
23 for 1-year mortality in women was no longer significant and the risk of in-hospital mortality still  
24  
25 significantly elevated. It should be noted that more than 50% of patients were treated with PCI in  
26  
27 the most study conducted among the general STEMI patients and included by our analysis, even  
28  
29 more than 90% in some included studies.<sup>12 24</sup> The increasing rate of primary PCI in recent years  
30  
31 might be a reason for the consistency of our findings and previous studies conducted specifically  
32  
33 among STEMI patients undergoing PCI.  
34  
35

36  
37 Complications including bleeding, heart failure and mechanical complications are more likely to  
38  
39 develop in women with acute myocardial infarction and increase the risk of mortality.<sup>14 41 42</sup>  
40  
41 Bleeding secondary to antithrombotic therapies and invasive procedures is more frequent in  
42  
43 women.<sup>43</sup> Three included studies reported incidence of bleeding following STEMI and they all  
44  
45 found that women were at higher risk of bleeding.<sup>10 13 18</sup> One study included in our analysis  
46  
47 examined the relationships among sex, acute heart failure, and related outcomes after STEMI.<sup>14</sup> Its  
48  
49 results demonstrate that women are at higher risk to develop de novo heart failure after STEMI and  
50  
51 women with de novo heart failure have worse survival compared with man. However, we could not  
52  
53 compare the incidence of these complications due to the lack of sufficient data. Mechanical  
54  
55 complications requiring surgical intervention are also much more common in women after acute  
56  
57 myocardial infarction and associated with high mortality rates.<sup>44</sup>  
58  
59

60 Several limitations of this meta-analysis should be considered. First, the included studies are all

1  
2  
3  
4 observational studies except one post hoc analysis of randomized controlled trial. Hence, there may  
5  
6 be residual confounding bias inherent in the observational study design in our meta-analysis. Second,  
7  
8 in adjusted analysis, not all included studies adjusted for the same confounders and not all studies  
9  
10 reported adjusted RRs. The confounders which were adjusted in the included studies might differ  
11  
12 greatly across studies. Third, there was substantial heterogeneity in our meta-analysis, which could  
13  
14 partly be attributed to the wide variability in the sample sizes, locations, and treatment regimens  
15  
16 across included studies. Additionally, although we calculated adjusted RRs for all-cause mortality,  
17  
18 it needed to be noted that relevant confounders might have differed across studies. Fourth, the  
19  
20 analysis of long-term mortality, especially the adjusted analysis, included far fewer studies  
21  
22 compared with analysis of short-term mortality. Hence, there might be significant bias in the results  
23  
24 about long-term mortality.

25  
26  
27 In conclusion, our meta-analysis, pooling data from contemporary literature, shows that women  
28  
29 with STEMI have a higher risk of short-term mortality but not long-term mortality. The effect of sex  
30  
31 differences on mortality in patients with STEMI remain significant after adjustment for baseline  
32  
33 cardiovascular risk factors and clinical profiles, suggesting that public awareness of increased risk  
34  
35 and further improvements in management in women with STEMI are necessary.

#### 36 37 38 **Other Information:**

#### 39 40 41 42 **Contribution statement**

43  
44 Ziwei Xi: Study concepts, Study design, Literature research, Statistical analysis, Manuscript  
45  
46 preparation, Manuscript editing. Tingting Guo and Yong Wang: Data acquisition, Data  
47  
48 analysis/interpretation. Jianan Li, Yang Li, Jianfeng Zheng and Runlin Gao: Manuscript  
49  
50 revision/review. Hong Qiu: Manuscript final version approval.

#### 51 52 53 54 55 **Conflict of interest**

56  
57  
58 The authors declare that there is no conflict of interest.  
59  
60

## Funding

This research received no specific grant from any funding agency in the public, commercial, or not-for-profit sectors.

## Ethics approval

The institutional central committee at Fuwai Hospital approved that the study protocol and inform consent was not required for a systematic review and meta-analysis.

## Data sharing statement

As this is a systematic review and meta-analysis, the data used in the study have already been published by the authors of the included studies. All data relevant to the study are included in the article or uploaded as supplementary information.

Table 1 Characteristics of included studies.

| <b>First Author</b> | <b>Year</b> | <b>Region</b>         | <b>Study design</b> | <b>Data source</b>      | <b>Multicenter</b> | <b>Time of enrollment</b> | <b>Number of STEMI patients</b> | <b>Female</b>    | <b>Endpoint</b>                                                   | <b>Follow-up</b> |
|---------------------|-------------|-----------------------|---------------------|-------------------------|--------------------|---------------------------|---------------------------------|------------------|-------------------------------------------------------------------|------------------|
| <b>Venetsanos</b>   | 2017        | 13 countries          | Prospective         | Clinical registry       | Yes                | Sep, 2011-<br>Oct, 2013   | 1,862                           | 369 (20.0)       | Major adverse cardiovascular events and definite stent thrombosis | 30 d             |
| <b>Ali</b>          | 2018        | Germany               | Prospective         | Administrative database | No                 | 2013-2017                 | 312                             | 101 (32.4)       | All-cause in-hospital mortality                                   | NA               |
| <b>Langabeer</b>    | 2018        | US                    | Prospective         | Clinical registry       | Yes                | Jan, 2010-<br>Dec, 2015   | 9,674                           | 2,569<br>(26.6)  | In-hospital mortality                                             | NA               |
| <b>Tang</b>         | 2018        | China                 | Prospective         | Administrative database | No                 | Jan, 2013-<br>Dec, 2013   | 1,238                           | 210 (1.9)        | Major adverse cardiac and cerebrovascular events                  | 730 ± 30 d       |
| <b>Cenko</b>        | 2019        | 12 European countries | Prospective         | Clinical registry       | Yes                | Jan, 2010-Jul,<br>2018    | 10,443                          | 3,112<br>(29.8)  | 30-day all-cause mortality                                        | 30 d             |
| <b>Hao</b>          | 2019        | China                 | Prospective         | Clinical registry       | Yes                | Nov, 2014-<br>Jun, 2018   | 50,203                          | 11,016<br>(21.9) | In-hospital mortality                                             | NA               |
| <b>Hannan</b>       | 2019        | US                    | Retrospective       | Administrative database | Yes                | Jan, 2013-<br>Dec, 2015   | 23,809                          | 7,791<br>(32.7)  | In hospital/30-day mortality                                      | 30 d             |



|                  |      |             |               |                         |     |                          |        |              |                                                             |                 |
|------------------|------|-------------|---------------|-------------------------|-----|--------------------------|--------|--------------|-------------------------------------------------------------|-----------------|
| <b>Maznyczka</b> | 2019 | UK          | Retrospective | Clinical registry       | No  | July, 2011-<br>Nov, 2012 | 324    | 87 (26.9)    | All-cause death/ first heart failure hospitalization        | 5 years         |
| <b>Stehli</b>    | 2019 | Australia   | Prospective   | Clinical registry       | Yes | 2013-2016                | 6,431  | 1,317 (20.5) | In hospital/30-day major adverse events, and major bleeding | 30 d            |
| <b>Burgess</b>   | 2020 | Australia   | Prospective   | Administrative database | No  | Dec, 2010-<br>Apr, 2014  | 589    | 123 (21)     | Cardiac death and myocardial infarction                     | 2 years         |
| <b>Dharma</b>    | 2020 | Indonesia   | Retrospective | Administrative database | No  | Feb, 2011-<br>Aug, 2019  | 6,557  | 929 (14.2)   | All-cause mortality                                         | 30 d and 1 year |
| <b>Kerkmanx</b>  | 2020 | Netherlands | Retrospective | Administrative database | Yes | 2015-2016                | 787    | 229 (29)     | All-cause mortality                                         | 1 year          |
| <b>Siabani</b>   | 2020 | Iran        | Prospective   | Clinical registry       | No  | Jun, 2016-<br>May, 2018  | 1,484  | 311(21)      | In-hospital mortality                                       | NA              |
| <b>Tai</b>       | 2020 | China       | Retrospective | Administrative database | No  | Jan, 2013-<br>Dec, 2017  | 182    | 56 (30.8)    | In hospital/1-year mortality                                | 1 year          |
| <b>Tizón</b>     | 2020 | Spain       | Prospective   | Clinical registry       | Yes | 2010-2016                | 14,690 | 3,486 (23.7) | 30-day/1-year all-cause mortality                           | 1 year          |

Table 2 Baseline characteristics of participants in included studies.

| First | Year | Age, mean (SD), years | Diabetes | Hypertensio | Hyperlipidemi | Smokin | Prior | Prior |
|-------|------|-----------------------|----------|-------------|---------------|--------|-------|-------|
|-------|------|-----------------------|----------|-------------|---------------|--------|-------|-------|

| Author            |      |               |               | , n (%)       |               | n, n (%)      |               | a, n (%)      |               | g, n (%)     |               | MI, n (%)  |              | PCI, n (%) |             |
|-------------------|------|---------------|---------------|---------------|---------------|---------------|---------------|---------------|---------------|--------------|---------------|------------|--------------|------------|-------------|
|                   |      | Female        | Male          | Female        | Male          | Female        | Male          | Female        | Male          | Female       | Male          | Female     | Male         | Female     | Male        |
| <b>Venetsanos</b> | 2017 | 69 (13.0)     | 59 (11.0)     | 48 (13.0)     | 205 (13.7)    | 190 (51.5)    | 605 (40.5)    | 117 (31.7)    | 536 (35.9)    | NA           | NA            | 24 (6.5)   | 135 (9.0)    | 16 (4.3)   | 124 (8.3)   |
| <b>Ali</b>        | 2018 | NA            | NA           | NA            | NA         | NA           | NA         | NA          |
| <b>Langabeer</b>  | 2018 | 62.5 (13.6)   | 60.2 (12.5)   | 759 (29.6)    | 1,975 (27.8)  | NA            | NA            | 1,265 (49.3)  | 3,693 (52.0)  | 951 (37.0)   | 2,763 (38.9)  | 435 (16.9) | 1,304 (18.4) | NA         | NA          |
| <b>Tang</b>       | 2018 | 64.5 (9.3)    | 54.4 (10.7)   | 66 (31.4)     | 311 (25.1)    | 141 (67.1)    | 659 (53.3)    | 125 (59.5)    | 749 (60.3)    | 33 (15.7)    | 957 (77.3)    | 10 (4.8)   | 83 (6.7)     | 60 (28.6)  | 282 (22.8)  |
| <b>Cenko</b>      | 2019 | 66.1 (11.7)   | 59.7 (11.7)   | 925 (29.7)    | 1,531 (20.9)  | 2,322 (74.6)  | 4,502 (61.4)  | 1,353 (43.3)  | 3,100 (42.3)  | 1,010 (32.5) | 3,714 (50.7)  | 301 (9.7)  | 842 (11.5)   | 306 (9.8)  | 762 (10.4)  |
| <b>Hao</b>        | 2019 | 69.0 (10.6)   | 61.1 (12.4)   | 10,141 (48.1) | 24,082 (39.4) | 15,607 (74.1) | 38,426 (62.9) | 17,996 (85.4) | 50,944 (83.3) | 1,719 (8.2)  | 32,377 (53.0) | NA         | NA           | NA         | NA          |
| <b>Hannan</b>     | 2019 | 70.72 (14.73) | 62.11 (12.82) | NA            | NA            | NA            | NA            | NA            | NA            | NA           | NA            | NA         | NA           | 868 (11.1) | 2206 (13.8) |
| <b>Maznyczka</b>  | 2019 | 61.2 (12.2)   | 58.6 (11.2)   | 8 (9.2)       | 26 (11.0)     | 32 (36.8)     | 73 (30.8)     | 28 (32.2)     | 66 (27.8)     | 57 (65.5)    | 139 (58.6)    | 5 (5.7)    | 20 (8.4)     | 2 (2.3)    | 16 (6.8)    |

|                 |      |                         |                         |               |                 |              |                 |            |                 |               |                 |              |              |              |               |
|-----------------|------|-------------------------|-------------------------|---------------|-----------------|--------------|-----------------|------------|-----------------|---------------|-----------------|--------------|--------------|--------------|---------------|
| <b>Stehli</b>   | 2019 | 66.5<br>(13.2)          | 60.8<br>(12.2)          | 245<br>(18.6) | 770<br>(15.1)   | NA           | NA              | NA         | NA              | NA            | NA              | NA           | NA           | 104<br>(7.9) | 577<br>(11.3) |
| <b>Burgess</b>  | 2020 | 62.7<br>(52.7-<br>73.2) | 58.2<br>(50.6-<br>65.7) | 39 (31.7)     | 88<br>(18.9)    | 84 (68.3)    | 243<br>(52.1)   | 83 (67.5)  | 253<br>(52.3)   | 64 (52.0)     | 252<br>(54.1)   | 9 (7.3)      | 41<br>(8.8)  | NA           | NA            |
| <b>Dharma</b>   | 2020 | 60 (10)                 | 55 (10)                 | 403<br>(43.4) | 1548<br>(27.5)  | 647 (69.6)   | 2,889<br>(51.3) | 299 (32.2) | 1,779<br>(31.6) | 109<br>(11.7) | 4,049<br>(71.9) | NA           | NA           | NA           | NA            |
| <b>Kerkmanx</b> | 2020 | 68 (14)                 | 61 (12)                 | 39 (17.6)     | 66<br>(12.5)    | 101 (45.7)   | 178<br>(33.6)   | 56 (25.9)  | 110<br>(21.0)   | 88 (41.1)     | 258<br>(49.3)   | 30<br>(13.6) | 79<br>(13.7) | 33<br>(14.4) | 77<br>(14.2)  |
| <b>Siabani</b>  | 2020 | 65.8<br>(11.3)          | 59.0<br>(12.4)          | 114<br>(37.7) | 187<br>(16.2)   | 195 (63.7)   | 410<br>(35.4)   | 110 (36.7) | 208<br>(18.5)   | 41 (13.2)     | 655<br>(55.9)   | NA           | NA           | NA           | NA            |
| <b>Tai</b>      | 2020 | 78 (76-<br>81)          | 78 (76-<br>80)          | 96 (35.2)     | 116<br>(26.5)   | 217 (79.5)   | 319<br>(72.8)   | NA         | NA              | 14 (5.4)      | 239<br>(56.5)   | NA           | NA           | 36<br>(13.5) | 78<br>(18.1)  |
| <b>Tizón</b>    | 2020 | 69.9<br>(13.7)          | 60.9<br>(12.6)          | 844<br>(24.2) | 1,927<br>(17.2) | 1,192 (34.2) | 2,722<br>(24.3) | 878 (25.2) | 2,375<br>(21.2) | 474<br>(13.6) | 2,711<br>(24.2) | NA           | NA           | NA           | NA            |

## Reference:

1. Virani SS, Alonso A, Benjamin EJ, et al. Heart Disease and Stroke Statistics-2020 Update: A Report From the American Heart Association. *Circulation* 2020;141(9):e139-e596. doi: 10.1161/cir.0000000000000757 [published Online First: 2020/01/30]
2. Pancholy SB, Shantha GP, Patel T, et al. Sex differences in short-term and long-term all-cause mortality among patients with ST-segment elevation myocardial infarction treated by primary percutaneous intervention: a meta-analysis. *JAMA internal medicine* 2014;174(11):1822-30. doi: 10.1001/jamainternmed.2014.4762 [published Online First: 2014/09/30]
3. Wenger NK, Arnold A, Bairey Merz CN, et al. Hypertension Across a Woman's Life Cycle. *Journal of the American College of Cardiology* 2018;71(16):1797-813. doi: 10.1016/j.jacc.2018.02.033 [published Online First: 2018/04/21]
4. Peters SAE, Woodward M. Sex Differences in the Burden and Complications of Diabetes. *Current diabetes reports* 2018;18(6):33. doi: 10.1007/s11892-018-1005-5 [published Online First: 2018/04/20]
5. Huded CP, Johnson M, Kravitz K, et al. 4-Step Protocol for Disparities in STEMI Care and Outcomes in Women. *Journal of the American College of Cardiology* 2018;71(19):2122-32. doi: 10.1016/j.jacc.2018.02.039 [published Online First: 2018/03/15]
6. Mehta LS, Beckie TM, DeVon HA, et al. Acute Myocardial Infarction in Women: A Scientific Statement From the American Heart Association. *Circulation* 2016;133(9):916-47. doi: 10.1161/cir.0000000000000351 [published Online First: 2016/01/27]

- 1  
2  
3  
4 7. Reed GW, Rossi JE, Cannon CP. Acute myocardial infarction. *Lancet (London, England)*  
5  
6 2017;389(10065):197-210. doi: 10.1016/s0140-6736(16)30677-8 [published Online  
7  
8 First: 2016/08/10]  
9  
10  
11 8. Moher D, Liberati A, Tetzlaff J, et al. Preferred reporting items for systematic reviews and  
12  
13 meta-analyses: the PRISMA statement. *BMJ (Clinical research ed)* 2009;339:b2535.  
14  
15 doi: 10.1136/bmj.b2535 [published Online First: 2009/07/23]  
16  
17  
18 9. Stang A. Critical evaluation of the Newcastle-Ottawa scale for the assessment of the quality  
19  
20 of nonrandomized studies in meta-analyses. *European journal of epidemiology*  
21  
22 2010;25(9):603-5. doi: 10.1007/s10654-010-9491-z [published Online First:  
23  
24 2010/07/24]  
25  
26  
27  
28 10. Venetsanos D, Sederholm Lawesson S, Alfredsson J, et al. Association between gender  
29  
30 and short-term outcome in patients with ST elevation myocardial infraction participating  
31  
32 in the international, prospective, randomised Administration of Ticagrelor in the  
33  
34 catheterisation Laboratory or in the Ambulance for New ST elevation myocardial  
35  
36 Infarction to open the Coronary artery (ATLANTIC) trial: a prespecified analysis. *BMJ*  
37  
38 *open* 2017;7(9):e015241. doi: 10.1136/bmjopen-2016-015241 [published Online First:  
39  
40 2017/09/25]  
41  
42  
43  
44  
45  
46  
47 11. Ali M, Lange SA, Wittlinger T, et al. In-hospital mortality after acute STEMI in patients  
48  
49 undergoing primary PCI. *Herz* 2018;43(8):741-45. doi: 10.1007/s00059-017-4621-y  
50  
51 [published Online First: 2017/10/11]  
52  
53  
54  
55 12. Langabeer JR, 2nd, Henry TD, Fowler R, et al. Sex-Based Differences in Discharge  
56  
57 Disposition and Outcomes for ST-Segment Elevation Myocardial Infarction Patients  
58  
59  
60

- 1  
2  
3  
4 Within a Regional Network. *Journal of women's health (2002)* 2018;27(8):1001-06. doi:  
5  
6 10.1089/jwh.2017.6553 [published Online First: 2018/01/11]  
7  
8  
9 13. Tang XF, Song Y, Xu JJ, et al. Effect of sex difference in clinical presentation (stable  
10  
11 coronary artery disease vs unstable angina pectoris or non-ST-elevation myocardial  
12  
13 infarction vs ST-elevation myocardial infarction) on 2-year outcomes in patients  
14  
15 undergoing percutaneous coronary intervention. *Journal of interventional cardiology*  
16  
17 2018;31(1):5-14. doi: 10.1111/joic.12451 [published Online First: 2017/10/13]  
18  
19  
20  
21  
22 14. Cenko E, van der Schaar M, Yoon J, et al. Sex-Related Differences in Heart Failure After  
23  
24 ST-Segment Elevation Myocardial Infarction. *Journal of the American College of*  
25  
26 *Cardiology* 2019;74(19):2379-89. doi: 10.1016/j.jacc.2019.08.1047 [published Online  
27  
28 First: 2019/11/09]  
29  
30  
31  
32 15. Hao Y, Liu J, Liu J, et al. Sex Differences in In-Hospital Management and Outcomes of  
33  
34 Patients With Acute Coronary Syndrome. *Circulation* 2019;139(15):1776-85. doi:  
35  
36 10.1161/circulationaha.118.037655 [published Online First: 2019/01/23]  
37  
38  
39  
40 16. Hannan EL, Wu Y, Tamis-Holland J, et al. Sex differences in the treatment and outcomes  
41  
42 of patients hospitalized with ST-elevation myocardial infarction. *Catheterization and*  
43  
44 *cardiovascular interventions : official journal of the Society for Cardiac Angiography &*  
45  
46 *Interventions* 2020;95(2):196-204. doi: 10.1002/ccd.28286 [published Online First:  
47  
48 2019/04/24]  
49  
50  
51  
52 17. Maznyczka AM, Carrick D, Carberry J, et al. Sex-based associations with microvascular  
53  
54 injury and outcomes after ST-segment elevation myocardial infarction. *Open heart*  
55  
56 2019;6(1):e000979. doi: 10.1136/openhrt-2018-000979 [published Online First:  
57  
58  
59  
60

2019/06/07]

18. Stehli J, Martin C, Brennan A, et al. Sex Differences Persist in Time to Presentation, Revascularization, and Mortality in Myocardial Infarction Treated With Percutaneous Coronary Intervention. *Journal of the American Heart Association* 2019;8(10):e012161. doi: 10.1161/jaha.119.012161 [published Online First: 2019/05/17]
19. Burgess SN, Juergens CP, Nguyen TL, et al. Comparison of Late Cardiac Death and Myocardial Infarction Rates in Women Vs Men With ST-Elevation Myocardial Infarction. *The American journal of cardiology* 2020;128:120-26. doi: 10.1016/j.amjcard.2020.04.044 [published Online First: 2020/07/12]
20. Dharma S, Dakota I, Andriantoro H, et al. Association of gender with clinical outcomes of patients with acute ST-segment elevation myocardial infarction presenting with acute heart failure. *Coronary artery disease* 2020 doi: 10.1097/mca.0000000000000892 [published Online First: 2020/04/26]
21. Kerkman T, Ten Brinke LBG, Huybrechts B, et al. Evaluation of sex differences in patients with ST-elevated myocardial infarction: an observational cohort study in Amsterdam and surrounding region. *Netherlands heart journal : monthly journal of the Netherlands Society of Cardiology and the Netherlands Heart Foundation* 2020;28(11):595-603. doi: 10.1007/s12471-020-01435-9 [published Online First: 2020/06/13]
22. Siabani S, Davidson PM, Babakhani M, et al. Gender-based difference in early mortality among patients with ST-segment elevation myocardial infarction: insights from Kermanshah STEMI Registry. *Journal of cardiovascular and thoracic research* 2020;12(1):63-68. doi: 10.34172/jcvtr.2020.10 [published Online First: 2020/03/27]

- 1  
2  
3  
4 23. Tai S, Li X, Yang H, et al. Sex Differences in the Outcomes of Elderly Patients with Acute  
5  
6 Coronary Syndrome. *Cardiology research and practice* 2020;2020:5091490. doi:  
7  
8 10.1155/2020/5091490 [published Online First: 2020/05/27]  
9  
10  
11 24. Tizón-Marcos H, Vaquerizo B, Marrugat J, et al. Differences in 30-day complications and  
12  
13 1-year mortality by sex in patients with a first STEMI managed by the Codi IAM network  
14  
15 between 2010 and 2016. *Revista espanola de cardiologia (English ed)* 2020 doi:  
16  
17 10.1016/j.rec.2020.06.002 [published Online First: 2020/07/15]  
18  
19  
20 25. Bavishi C, Bangalore S, Patel D, et al. Short and long-term mortality in women and men  
21  
22 undergoing primary angioplasty: A comprehensive meta-analysis. *International journal*  
23  
24 *of cardiology* 2015;198:123-30. doi: 10.1016/j.ijcard.2015.07.001 [published Online  
25  
26 First: 2015/07/15]  
27  
28  
29 26. Kosmidou I, Redfors B, Selker HP, et al. Infarct size, left ventricular function, and prognosis  
30  
31 in women compared to men after primary percutaneous coronary intervention in ST-  
32  
33 segment elevation myocardial infarction: results from an individual patient-level pooled  
34  
35 analysis of 10 randomized trials. *European heart journal* 2017;38(21):1656-63. doi:  
36  
37 10.1093/eurheartj/ehx159 [published Online First: 2017/04/14]  
38  
39  
40 27. Millett ERC, Peters SAE, Woodward M. Sex differences in risk factors for myocardial  
41  
42 infarction: cohort study of UK Biobank participants. *BMJ (Clinical research ed)*  
43  
44 2018;363:k4247. doi: 10.1136/bmj.k4247 [published Online First: 2018/11/09]  
45  
46  
47 28. Yusuf S, Hawken S, Ounpuu S, et al. Effect of potentially modifiable risk factors associated  
48  
49 with myocardial infarction in 52 countries (the INTERHEART study): case-control study.  
50  
51 *Lancet (London, England)* 2004;364(9438):937-52. doi: 10.1016/s0140-  
52  
53  
54  
55  
56  
57  
58  
59  
60



6736(04)17018-9 [published Online First: 2004/09/15]

29. Harreiter J, Fadl H, Kautzky-Willer A, et al. Do Women with Diabetes Need More Intensive Action for Cardiovascular Reduction than Men with Diabetes? *Current diabetes reports* 2020;20(11):61. doi: 10.1007/s11892-020-01348-2 [published Online First: 2020/10/10]
30. Arora S, Stouffer GA, Kucharska-Newton AM, et al. Twenty Year Trends and Sex Differences in Young Adults Hospitalized With Acute Myocardial Infarction. *Circulation* 2019;139(8):1047-56. doi: 10.1161/circulationaha.118.037137 [published Online First: 2018/12/28]
31. Zhao M, Woodward M, Vaartjes I, et al. Sex Differences in Cardiovascular Medication Prescription in Primary Care: A Systematic Review and Meta-Analysis. *Journal of the American Heart Association* 2020;9(11):e014742. doi: 10.1161/jaha.119.014742 [published Online First: 2020/05/21]
32. Eindhoven DC, Hilt AD, Zwaan TC, et al. Age and gender differences in medical adherence after myocardial infarction: Women do not receive optimal treatment - The Netherlands claims database. *European journal of preventive cardiology* 2018;25(2):181-89. doi: 10.1177/2047487317744363 [published Online First: 2017/11/23]
33. Smolina K, Ball L, Humphries KH, et al. Sex Disparities in Post-Acute Myocardial Infarction Pharmacologic Treatment Initiation and Adherence: Problem for Young Women. *Circulation Cardiovascular quality and outcomes* 2015;8(6):586-92. doi: 10.1161/circoutcomes.115.001987 [published Online First: 2015/10/16]
34. Nguyen HL, Goldberg RJ, Gore JM, et al. Age and sex differences, and changing trends, in the use of evidence-based therapies in acute coronary syndromes: perspectives

- 1  
2  
3  
4 from a multinational registry. *Coronary artery disease* 2010;21(6):336-44. doi:  
5  
6 10.1097/MCA.0b013e32833ce07c [published Online First: 2010/07/28]  
7  
8  
9 35. Pelletier R, Humphries KH, Shimony A, et al. Sex-related differences in access to care  
10  
11 among patients with premature acute coronary syndrome. *CMAJ : Canadian Medical*  
12  
13 *Association journal = journal de l'Association medicale canadienne* 2014;186(7):497-  
14  
15 504. doi: 10.1503/cmaj.131450 [published Online First: 2014/03/19]  
16  
17  
18  
19 36. Murphy AC, Yudi MB, Farouque O, et al. Impact of Gender and Door-to-Balloon Times on  
20  
21 Long-Term Mortality in Patients Presenting With ST-Elevation Myocardial Infarction.  
22  
23 *The American journal of cardiology* 2019;124(6):833-41. doi:  
24  
25 10.1016/j.amjcard.2019.06.008 [published Online First: 2019/07/23]  
26  
27  
28  
29 37. D'Onofrio G, Safdar B, Lichtman JH, et al. Sex differences in reperfusion in young patients  
30  
31 with ST-segment-elevation myocardial infarction: results from the VIRGO study.  
32  
33 *Circulation* 2015;131(15):1324-32. doi: 10.1161/circulationaha.114.012293 [published  
34  
35 Online First: 2015/03/21]  
36  
37  
38  
39 38. Bugiardini R, Ricci B, Cenko E, et al. Delayed Care and Mortality Among Women and Men  
40  
41 With Myocardial Infarction. *Journal of the American Heart Association* 2017;6(8) doi:  
42  
43 10.1161/jaha.117.005968 [published Online First: 2017/09/02]  
44  
45  
46  
47 39. Khan NA, Daskalopoulou SS, Karp I, et al. Sex differences in acute coronary syndrome  
48  
49 symptom presentation in young patients. *JAMA internal medicine* 2013;173(20):1863-  
50  
51 71. doi: 10.1001/jamainternmed.2013.10149 [published Online First: 2013/09/18]  
52  
53  
54  
55 40. Canto JG, Rogers WJ, Goldberg RJ, et al. Association of age and sex with myocardial  
56  
57 infarction symptom presentation and in-hospital mortality. *Jama* 2012;307(8):813-22.  
58  
59  
60

1  
2  
3  
4 doi: 10.1001/jama.2012.199 [published Online First: 2012/02/24]  
5

6  
7 41. Moscucci M, Fox KA, Cannon CP, et al. Predictors of major bleeding in acute coronary  
8  
9 syndromes: the Global Registry of Acute Coronary Events (GRACE). *European heart*  
10  
11 *journal* 2003;24(20):1815-23. doi: 10.1016/s0195-668x(03)00485-8 [published Online  
12  
13  
14 First: 2003/10/18]  
15

16  
17 42. Kolte D, Khera S, Aronow WS, et al. Trends in incidence, management, and outcomes of  
18  
19 cardiogenic shock complicating ST-elevation myocardial infarction in the United States.  
20  
21 *Journal of the American Heart Association* 2014;3(1):e000590. doi:  
22  
23 10.1161/jaha.113.000590 [published Online First: 2014/01/15]  
24  
25

26  
27 43. Nanna MG, Hajduk AM, Krumholz HM, et al. Sex-Based Differences in Presentation,  
28  
29 Treatment, and Complications Among Older Adults Hospitalized for Acute Myocardial  
30  
31 Infarction: The SILVER-AMI Study. *Circulation Cardiovascular quality and outcomes*  
32  
33 2019;12(10):e005691. doi: 10.1161/circoutcomes.119.005691 [published Online First:  
34  
35 2019/10/15]  
36  
37

38  
39 44. Elbadawi A, Elgendy IY, Mahmoud K, et al. Temporal Trends and Outcomes of Mechanical  
40  
41 Complications in Patients With Acute Myocardial Infarction. *JACC Cardiovascular*  
42  
43 *interventions* 2019;12(18):1825-36. doi: 10.1016/j.jcin.2019.04.039 [published Online  
44  
45  
46 First: 2019/09/21]  
47  
48  
49  
50  
51  
52  
53  
54  
55  
56  
57  
58  
59  
60

1  
2  
3  
4 Figure 1 Flowchart of selection of studies included in meta-analysis.  
5  
6

7  
8 Figure 2 Forest plots of relative risks of short-term all-cause mortality among women and men with  
9  
10 ST-segment elevation myocardial infarction.

11  
12 Forest plots showing unadjusted (A) and adjusted (B) short-term all-cause mortality of women  
13  
14 compared with men with ST-segment elevation myocardial infarction using random-effects model.  
15

16  
17 Figure 3 Forest plots of relative risks of long-term all-cause mortality among women and men with  
18  
19 ST-segment elevation myocardial infarction.

20  
21 Forest plots showing unadjusted (A) and adjusted (B) long-term all-cause mortality of women  
22  
23 compared with men with ST-segment elevation myocardial infarction using random-effects model.  
24  
25  
26  
27  
28  
29  
30  
31  
32  
33  
34  
35  
36  
37  
38  
39  
40  
41  
42  
43  
44  
45  
46  
47  
48  
49  
50  
51  
52  
53  
54  
55  
56  
57  
58  
59  
60

Figure 1 Flowchart of selection of studies included in meta-analysis.

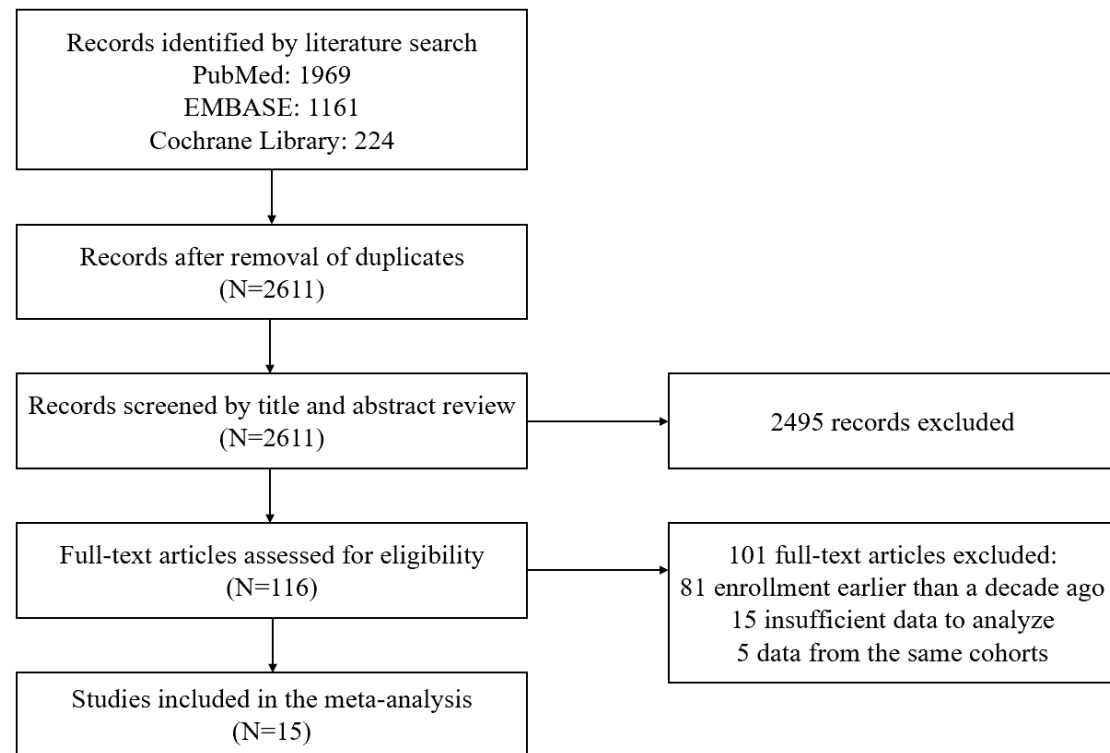

Figure 2 Forest plots of relative risks of short-term all-cause mortality among women and men with ST-segment elevation myocardial infarction.

A



B

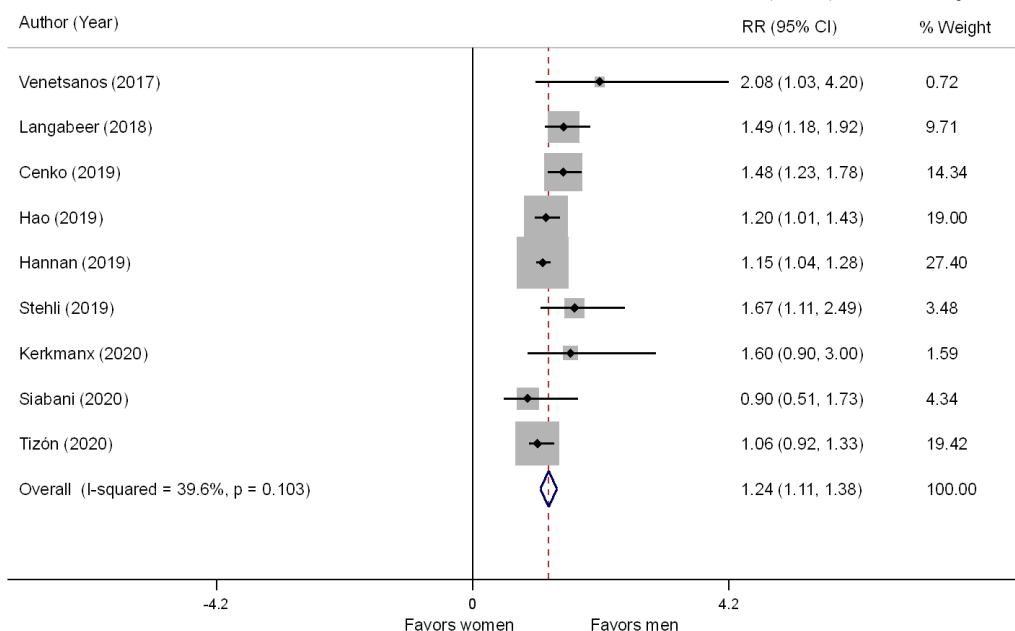

Forest plots showing unadjusted (A) and adjusted (B) short-term all-cause mortality of women compared with men with ST-segment elevation myocardial infarction using random-effects model.

Figure 3 Forest plots of relative risks of long-term all-cause mortality among women and men with ST-segment elevation myocardial infarction.

A



B



Forest plots showing unadjusted (A) and adjusted (B) long-term all-cause mortality of women compared with men with ST-segment elevation myocardial infarction using random-effects model.

eTable 1 Full search strategies for meta-analysis of studies reporting sex specific outcomes of patients with STEMI.

| Database                | Search strategy (publications accessible January 1, 2010 to August 1, 2020)                                                                                                                                                                                                                                                                                                                                                                                                                                                                                                                                                                                                                                                                                                                                                                                                                                              |
|-------------------------|--------------------------------------------------------------------------------------------------------------------------------------------------------------------------------------------------------------------------------------------------------------------------------------------------------------------------------------------------------------------------------------------------------------------------------------------------------------------------------------------------------------------------------------------------------------------------------------------------------------------------------------------------------------------------------------------------------------------------------------------------------------------------------------------------------------------------------------------------------------------------------------------------------------------------|
| <b>PubMed</b>           | ("gender"[Title/Abstract] OR "female"[Title/Abstract] OR "male"[Title/Abstract] OR "gender differences"[Title/Abstract] OR "sex differences"[Title/Abstract] OR "sex characteristics"[MeSH Terms]) AND ("death"[MeSH Terms] OR "mortality"[MeSH Terms] OR "hospital mortality"[MeSH Terms] OR "cardiac death"[Title/Abstract] OR "sudden cardiac death"[MeSH Terms] OR "all-cause mortality"[Title/Abstract] OR "long term mortality"[Title/Abstract] OR "one year mortality"[Title/Abstract] OR "cardiovascular mortality"[Title/Abstract] OR "short term mortality"[Title/Abstract]) AND ("myocardial infarction"[MeSH Terms] OR "acute myocardial infarction"[Title/Abstract] OR "ST Elevation Myocardial Infarction"[MeSH Terms] OR "myocardial necrosis"[Title/Abstract] OR "primary percutaneous coronary intervention"[Title/Abstract] OR "primary PCI"[Title/Abstract] OR "primary angioplasty"[Title/Abstract]) |
| <b>EMBASE</b>           | (gender.mp OR female.mp OR male.mp OR gender differences.mp OR sex differences.mp OR sex characteristics.mp) AND (death.mp OR mortality.mp OR hospital mortality.mp OR cardiac death.mp OR sudden cardiac death.mp OR all-cause mortality.mp OR long term mortality OR one year mortality.mp OR cardiovascular mortality.mp OR short term mortality) AND (myocardial infarction.mp OR acute myocardial infarction.mp OR ST Elevation Myocardial Infarction.mp OR myocardial necrosis.mp OR primary percutaneous coronary intervention.mp OR primary PCI.mp OR primary angioplasty.mp)                                                                                                                                                                                                                                                                                                                                    |
| <b>Cochrane Library</b> | [Title and abstract search] (gender OR female OR male OR gender differences OR sex differences OR sex characteristics) AND (death OR mortality OR hospital mortality OR cardiac death OR sudden cardiac death OR all-cause mortality OR long term mortality OR one year mortality OR cardiovascular mortality OR short term mortality) AND (myocardial infarction OR acute myocardial infarction OR ST Elevation Myocardial Infarction OR myocardial necrosis OR primary percutaneous coronary intervention OR primary PCI OR primary angioplasty)                                                                                                                                                                                                                                                                                                                                                                       |

eTable 2 Variables adjusted in the adjusted analyses from the included studies.

| First Author      | Year | Adjusted Variables                                                                                                                                                                                                                                                                                                                                             |
|-------------------|------|----------------------------------------------------------------------------------------------------------------------------------------------------------------------------------------------------------------------------------------------------------------------------------------------------------------------------------------------------------------|
| <b>Venetsanos</b> | 2017 | age, weight, prior MI, prior PCI, patient's history of diabetes, hypertension, non-hemorrhagic stroke, gastrointestinal bleeding, time from symptom onset to pre-PCI ECG, admission Killip class, baseline hemoglobin, eGFR, access site, use of Glycoprotein IIb/IIIa inhibitor, bivalirudin and unfractionated heparin, location of MI and revascularization |
| <b>Langabeer</b>  | 2018 | age, smoking, diabetes, prior CVD, prior stroke, heart failure, shock, length of stay, teaching, insurance, total ischemic time, door to balloon                                                                                                                                                                                                               |
| <b>Tang</b>       | 2018 | age, BMI, LVEF, serum creatinine, use of proton pump inhibitors, use of dual-antiplatelet therapy, previous PCI, diabetes mellitus, hypertension, previous stroke, current smoker, thrombocytopenia, use of femoral approach, use of intra-aortic balloon pump, and multivessel disease                                                                        |
| <b>Cenko</b>      | 2019 | age, family history of CAD, diabetes, hypertension, hypercholesterolemia, current smoking, former                                                                                                                                                                                                                                                              |



|                  |      |                                                                                                                                                                                                                                                                                                                                                                                                                                                                                                                                                                                                                                                                                                                                                                                                                                                                                                                                                                                                                                                                               |
|------------------|------|-------------------------------------------------------------------------------------------------------------------------------------------------------------------------------------------------------------------------------------------------------------------------------------------------------------------------------------------------------------------------------------------------------------------------------------------------------------------------------------------------------------------------------------------------------------------------------------------------------------------------------------------------------------------------------------------------------------------------------------------------------------------------------------------------------------------------------------------------------------------------------------------------------------------------------------------------------------------------------------------------------------------------------------------------------------------------------|
|                  |      | smoking, prior angina pectoris, prior myocardial infarction, prior PCI, prior CABG, peripheral artery disease, prior stroke, ST-segment elevation in anterior leads (at ECG), systolic blood pressure at baseline, heart rate at baseline, serum creatinine at baseline, Killip Class $\geq 2$                                                                                                                                                                                                                                                                                                                                                                                                                                                                                                                                                                                                                                                                                                                                                                                |
| <b>Hao</b>       | 2019 | Age, medical insurance status, acute heart failure, cardiogenic shock, cardiac arrest at admission, heart rate and systolic blood pressure, diabetes mellitus, smoking, history of CHD, heart failure, renal failure, and cerebrovascular disease, prehospital statin use, renal insufficiency, and transfer status.                                                                                                                                                                                                                                                                                                                                                                                                                                                                                                                                                                                                                                                                                                                                                          |
| <b>Hannan</b>    | 2019 | age, STEMI location, heart rate, mean arterial pressure, history of hospitalization in last year, history of PCI, history of CABG surgery, septicemia/sepsis/systemic inflammatory response /shock, metastatic cancer/acute leukemia, diabetes with acute complications, end stage liver disease, inflammatory bowel disease, coagulation defects and other specified hematological disorders, dementia, polyneuropathy, muscular dystrophy, seizure disorders and convulsions, coma/brain compression/anoxic damage, cardiorespiratory failure and shock, congestive heart failure, specified heart arrhythmias, ischemic or unspecified stroke, hemiplegia/hemiparesis, vascular disease with complications, vascular disease without complications, aspiration and specified bacterial pneumonias, acute renal failure, chronic kidney disease, Stage 5, unspecified renal failure, nephritis, pressure ulcer of skin with partial thickness skin loss*, pressure pre-ulcer skin changes, chronic ulcer of skin except pressure ulcer, lower limb/amputation complications |
| <b>Maznyczka</b> | 2019 | NA                                                                                                                                                                                                                                                                                                                                                                                                                                                                                                                                                                                                                                                                                                                                                                                                                                                                                                                                                                                                                                                                            |
| <b>Stehli</b>    | 2019 | age, diabetes mellitus, eGFR, previous PCI and/or coronary artery bypass grafting, history of peripheral vascular disease and CVD, LVEF, out-of-hospital and in-hospital cardiac arrest, cardiogenic shock, and occurrence time of symptom onset                                                                                                                                                                                                                                                                                                                                                                                                                                                                                                                                                                                                                                                                                                                                                                                                                              |
| <b>Burgess</b>   | 2020 | NA                                                                                                                                                                                                                                                                                                                                                                                                                                                                                                                                                                                                                                                                                                                                                                                                                                                                                                                                                                                                                                                                            |
| <b>Dharma</b>    | 2020 | NA                                                                                                                                                                                                                                                                                                                                                                                                                                                                                                                                                                                                                                                                                                                                                                                                                                                                                                                                                                                                                                                                            |
| <b>Kerkmanx</b>  | 2020 | NA                                                                                                                                                                                                                                                                                                                                                                                                                                                                                                                                                                                                                                                                                                                                                                                                                                                                                                                                                                                                                                                                            |
| <b>Siabani</b>   | 2020 | BMI $\geq 25$ , hypertension, diabetes, current smoking, hypercholesterolemia, congestive heart failure, Killip class (at first presentation) $\geq II$ , symptom-to-balloon time > 360 min and door-to-balloon time > 90 min                                                                                                                                                                                                                                                                                                                                                                                                                                                                                                                                                                                                                                                                                                                                                                                                                                                 |
| <b>Tai</b>       | 2020 | NA                                                                                                                                                                                                                                                                                                                                                                                                                                                                                                                                                                                                                                                                                                                                                                                                                                                                                                                                                                                                                                                                            |
| <b>Tizón</b>     | 2020 | age, diabetes mellitus, recruitment year, time from symptom onset to culprit coronary artery opening, and Killip class                                                                                                                                                                                                                                                                                                                                                                                                                                                                                                                                                                                                                                                                                                                                                                                                                                                                                                                                                        |

1  
2  
3  
4  
5  
6  
7  
8  
9  
10  
11  
12  
13  
14  
15  
16  
17  
18  
19  
20  
21  
22  
23  
24  
25  
26  
27  
28  
29  
30  
31  
32  
33  
34  
35  
36  
37  
38  
39  
40  
41  
42  
43  
44  
45  
46

eTable 3 Assessment of study quality using Newcastle-Ottawa scale.

| First Author | Year | Selection                                |                                    |                                       |                                                   | Comparability | Outcome               |                                             |                       | Total points |
|--------------|------|------------------------------------------|------------------------------------|---------------------------------------|---------------------------------------------------|---------------|-----------------------|---------------------------------------------|-----------------------|--------------|
|              |      | Representativeness of the exposed cohort | Selection of the no exposed cohort | Ascertainment of exposure to implants | Outcome of interest not present at start of study |               | Assessment of outcome | Follow-up long enough for outcomes to occur | Adequacy of follow-up |              |
| Venetsanos   | 2017 | *                                        | *                                  | *                                     | *                                                 | **            | *                     | \                                           | *                     | 8            |
| Ali          | 2018 | \                                        | \                                  | *                                     | *                                                 | \             | *                     | \                                           | *                     | 4            |
| Langabeer    | 2018 | *                                        | *                                  | *                                     | *                                                 | *             | *                     | \                                           | *                     | 7            |
| Tang         | 2018 | \                                        | \                                  | *                                     | *                                                 | **            | *                     | *                                           | *                     | 7            |
| Cenko        | 2019 | *                                        | *                                  | *                                     | *                                                 | **            | *                     | \                                           | *                     | 8            |
| Hao          | 2019 | *                                        | *                                  | *                                     | *                                                 | **            | *                     | \                                           | *                     | 8            |
| Hannan       | 2019 | *                                        | *                                  | *                                     | *                                                 | **            | *                     | \                                           | *                     | 8            |
| Maznyczka    | 2019 | \                                        | \                                  | *                                     | *                                                 | \             | *                     | *                                           | *                     | 5            |
| Stehli       | 2019 | *                                        | *                                  | *                                     | *                                                 | **            | *                     | \                                           | *                     | 8            |
| Burgess      | 2020 | \                                        | \                                  | *                                     | *                                                 | **            | *                     | *                                           | *                     | 7            |
| Dharma       | 2020 | \                                        | \                                  | *                                     | *                                                 | *             | *                     | *                                           | *                     | 6            |
| Kerkmanx     | 2020 | *                                        | *                                  | *                                     | *                                                 | \             | *                     | *                                           | *                     | 7            |
| Siabani      | 2020 | \                                        | \                                  | *                                     | *                                                 | *             | *                     | \                                           | *                     | 5            |
| Tai          | 2020 | \                                        | \                                  | *                                     | *                                                 | **            | *                     | *                                           | *                     | 7            |
| Tizón        | 2020 | *                                        | *                                  | *                                     | *                                                 | **            | *                     | *                                           | *                     | 9            |

eFigure 1 Forest plots of relative risks of short-term all-cause mortality of studies with Newcastle-Ottawa scale >7 points and with ≤7 points.

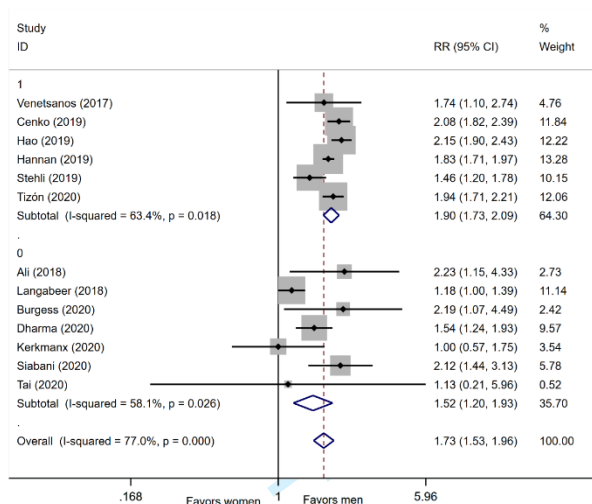

eFigure 2 Meta-influence analysis for unadjusted short-term mortality

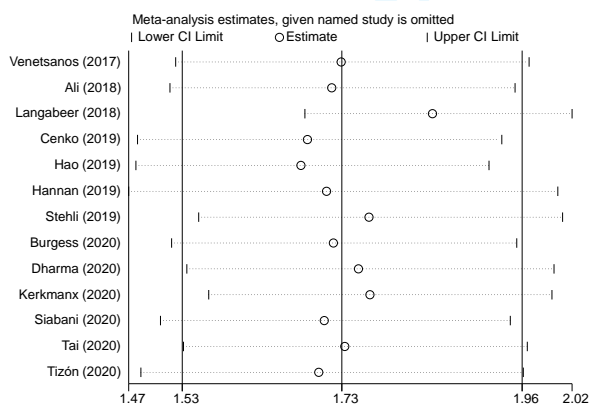

eFigure 3 Meta-influence analysis for unadjusted long-term mortality

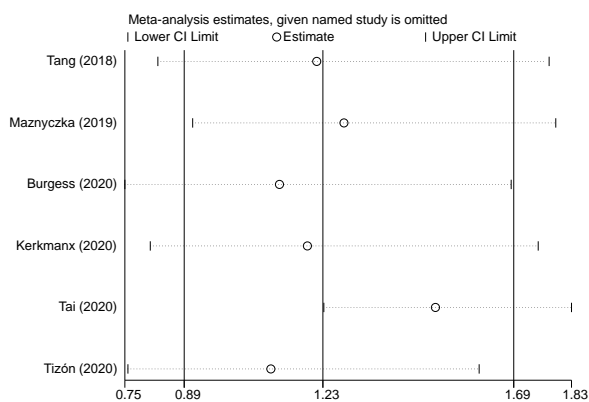

1  
2  
3  
4  
5  
6  
7  
8  
9  
10  
11  
12  
13  
14  
15  
16  
17  
18  
19  
20  
21  
22  
23  
24  
25  
26  
27  
28  
29  
30  
31  
32  
33  
34  
35  
36  
37  
38  
39  
40  
41  
42  
43  
44  
45  
46  
47  
48  
49  
50  
51  
52  
53  
54  
55  
56  
57  
58  
59  
60

eFigure 4 Funnel plots for publication bias for unadjusted short-term (A) and long-term (B) mortality

A

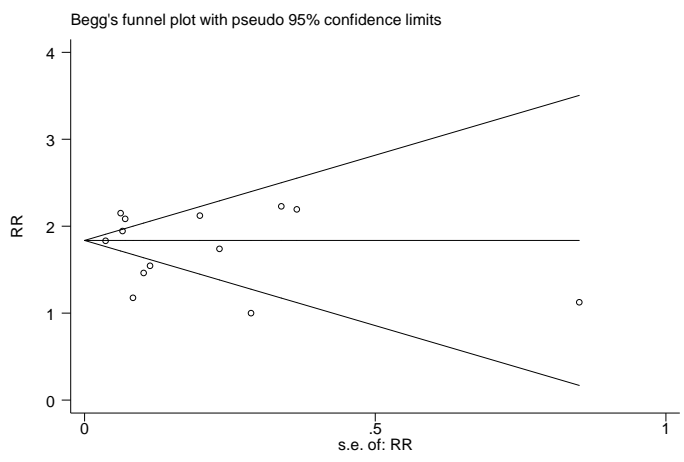

B

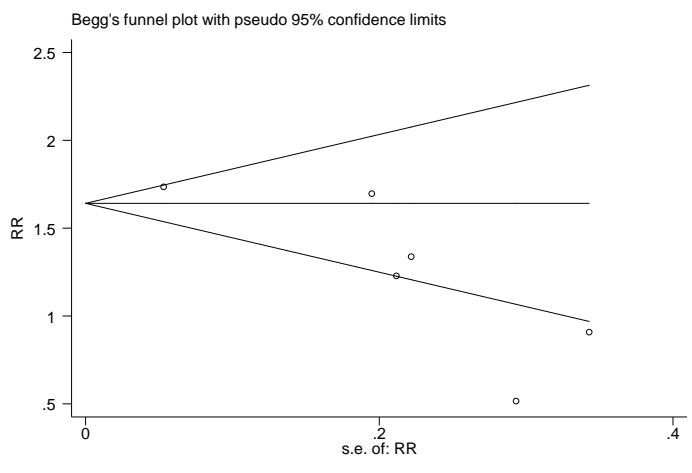

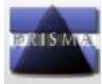

## PRISMA 2020 Checklist

1  
2  
3  
4  
5  
6  
7  
8  
9  
10  
11  
12  
13  
14  
15  
16  
17  
18  
19  
20  
21  
22  
23  
24  
25  
26  
27  
28  
29  
30  
31  
32  
33  
34  
35  
36  
37  
38  
39  
40  
41  
42  
43  
44  
45  
46  
47

| Section and Topic             | Item # | Checklist item                                                                                                                                                                                                                                                                                       | Location where item is reported |
|-------------------------------|--------|------------------------------------------------------------------------------------------------------------------------------------------------------------------------------------------------------------------------------------------------------------------------------------------------------|---------------------------------|
| <b>TITLE</b>                  |        |                                                                                                                                                                                                                                                                                                      |                                 |
| Title                         | 1      | Identify the report as a systematic review.                                                                                                                                                                                                                                                          | Title                           |
| <b>ABSTRACT</b>               |        |                                                                                                                                                                                                                                                                                                      |                                 |
| Abstract                      | 2      | See the PRISMA 2020 for Abstracts checklist.                                                                                                                                                                                                                                                         | Abstract                        |
| <b>INTRODUCTION</b>           |        |                                                                                                                                                                                                                                                                                                      |                                 |
| Rationale                     | 3      | Describe the rationale for the review in the context of existing knowledge.                                                                                                                                                                                                                          | Page 4                          |
| Objectives                    | 4      | Provide an explicit statement of the objective(s) or question(s) the review addresses.                                                                                                                                                                                                               | Page 4                          |
| <b>METHODS</b>                |        |                                                                                                                                                                                                                                                                                                      |                                 |
| Eligibility criteria          | 5      | Specify the inclusion and exclusion criteria for the review and how studies were grouped for the syntheses.                                                                                                                                                                                          | Page 5                          |
| Information sources           | 6      | Specify all databases, registers, websites, organisations, reference lists and other sources searched or consulted to identify studies. Specify the date when each source was last searched or consulted.                                                                                            | Page 4                          |
| Search strategy               | 7      | Present the full search strategies for all databases, registers and websites, including any filters and limits used.                                                                                                                                                                                 | Page 4                          |
| Selection process             | 8      | Specify the methods used to decide whether a study met the inclusion criteria of the review, including how many reviewers screened each record and each report retrieved, whether they worked independently, and if applicable, details of automation tools used in the process.                     | Page 5                          |
| Data collection process       | 9      | Specify the methods used to collect data from reports, including how many reviewers collected data from each report, whether they worked independently, any processes for obtaining or confirming data from study investigators, and if applicable, details of automation tools used in the process. | Page 5                          |
| Data items                    | 10a    | List and define all outcomes for which data were sought. Specify whether all results that were compatible with each outcome domain in each study were sought (e.g. for all measures, time points, analyses), and if not, the methods used to decide which results to collect.                        | Page 5                          |
|                               | 10b    | List and define all other variables for which data were sought (e.g. participant and intervention characteristics, funding sources). Describe any assumptions made about any missing or unclear information.                                                                                         | Page 5                          |
| Study risk of bias assessment | 11     | Specify the methods used to assess risk of bias in the included studies, including details of the tool(s) used, how many reviewers assessed each study and whether they worked independently, and if applicable, details of automation tools used in the process.                                    | Page 5                          |
| Effect measures               | 12     | Specify for each outcome the effect measure(s) (e.g. risk ratio, mean difference) used in the synthesis or presentation of results.                                                                                                                                                                  | Page 5                          |
| Synthesis methods             | 13a    | Describe the processes used to decide which studies were eligible for each synthesis (e.g. tabulating the study intervention characteristics and comparing against the planned groups for each synthesis (item #5)).                                                                                 | Page 5                          |
|                               | 13b    | Describe any methods required to prepare the data for presentation or synthesis, such as handling of missing summary statistics, or data conversions.                                                                                                                                                | Page 5                          |
|                               | 13c    | Describe any methods used to tabulate or visually display results of individual studies and syntheses.                                                                                                                                                                                               | Page 5                          |
|                               | 13d    | Describe any methods used to synthesize results and provide a rationale for the choice(s). If meta-analysis was performed, describe the model(s), method(s) to identify the presence and extent of statistical heterogeneity, and software package(s) used.                                          | Page 5                          |
|                               | 13e    | Describe any methods used to explore possible causes of heterogeneity among study results (e.g. subgroup analysis, meta-regression).                                                                                                                                                                 | Page 5                          |
|                               | 13f    | Describe any sensitivity analyses conducted to assess robustness of the synthesized results.                                                                                                                                                                                                         | Page 5                          |
| Reporting bias assessment     | 14     | Describe any methods used to assess risk of bias due to missing results in a synthesis (arising from reporting biases).                                                                                                                                                                              | Page 5                          |
| Certainty assessment          | 15     | Describe any methods used to assess certainty (or confidence) in the body of evidence for an outcome.                                                                                                                                                                                                | Page 5                          |



## PRISMA 2020 Checklist

1  
2  
3  
4  
5  
6  
7  
8  
9  
10  
11  
12  
13  
14  
15  
16  
17  
18  
19  
20  
21  
22  
23  
24  
25  
26  
27  
28  
29  
30  
31  
32  
33  
34  
35  
36  
37  
38  
39  
40  
41  
42  
43  
44  
45  
46  
47

| Section and Topic                              | Item # | Checklist item                                                                                                                                                                                                                                                                       | Location where item is reported |
|------------------------------------------------|--------|--------------------------------------------------------------------------------------------------------------------------------------------------------------------------------------------------------------------------------------------------------------------------------------|---------------------------------|
| <b>RESULTS</b>                                 |        |                                                                                                                                                                                                                                                                                      |                                 |
| Study selection                                | 16a    | Describe the results of the search and selection process, from the number of records identified in the search to the number of studies included in the review, ideally using a flow diagram.                                                                                         | Figure 1                        |
|                                                | 16b    | Cite studies that might appear to meet the inclusion criteria, but which were excluded, and explain why they were excluded.                                                                                                                                                          | Page 6                          |
| Study characteristics                          | 17     | Cite each included study and present its characteristics.                                                                                                                                                                                                                            | Table 1                         |
| Risk of bias in studies                        | 18     | Present assessments of risk of bias for each included study.                                                                                                                                                                                                                         | Page 7                          |
| Results of individual studies                  | 19     | For all outcomes, present, for each study: (a) summary statistics for each group (where appropriate) and (b) an effect estimate and its precision (e.g. confidence/credible interval), ideally using structured tables or plots.                                                     | Table 2                         |
| Results of syntheses                           | 20a    | For each synthesis, briefly summarise the characteristics and risk of bias among contributing studies.                                                                                                                                                                               | Page 6                          |
|                                                | 20b    | Present results of all statistical syntheses conducted. If meta-analysis was done, present for each the summary estimate and its precision (e.g. confidence/credible interval) and measures of statistical heterogeneity. If comparing groups, describe the direction of the effect. | Page 6                          |
|                                                | 20c    | Present results of all investigations of possible causes of heterogeneity among study results.                                                                                                                                                                                       | Page 6                          |
|                                                | 20d    | Present results of all sensitivity analyses conducted to assess the robustness of the synthesized results.                                                                                                                                                                           | Page 7                          |
| Reporting biases                               | 21     | Present assessments of risk of bias due to missing results (arising from reporting biases) for each synthesis assessed.                                                                                                                                                              | Page 7                          |
| Certainty of evidence                          | 22     | Present assessments of certainty (or confidence) in the body of evidence for each outcome assessed.                                                                                                                                                                                  | Page 6                          |
| <b>DISCUSSION</b>                              |        |                                                                                                                                                                                                                                                                                      |                                 |
| Discussion                                     | 23a    | Provide a general interpretation of the results in the context of other evidence.                                                                                                                                                                                                    | Page 7                          |
|                                                | 23b    | Discuss any limitations of the evidence included in the review.                                                                                                                                                                                                                      | Page 8-9                        |
|                                                | 23c    | Discuss any limitations of the review processes used.                                                                                                                                                                                                                                | Page 8-9                        |
|                                                | 23d    | Discuss implications of the results for practice, policy, and future research.                                                                                                                                                                                                       | Page 7-8                        |
| <b>OTHER INFORMATION</b>                       |        |                                                                                                                                                                                                                                                                                      |                                 |
| Registration and protocol                      | 24a    | Provide registration information for the review, including register name and registration number, or state that the review was not registered.                                                                                                                                       |                                 |
|                                                | 24b    | Indicate where the review protocol can be accessed, or state that a protocol was not prepared.                                                                                                                                                                                       |                                 |
|                                                | 24c    | Describe and explain any amendments to information provided at registration or in the protocol.                                                                                                                                                                                      |                                 |
| Support                                        | 25     | Describe sources of financial or non-financial support for the review, and the role of the funders or sponsors in the review.                                                                                                                                                        |                                 |
| Competing interests                            | 26     | Declare any competing interests of review authors.                                                                                                                                                                                                                                   |                                 |
| Availability of data, code and other materials | 27     | Report which of the following are publicly available and where they can be found: template data collection forms; data extracted from included studies; data used for all analyses; analytic code; any other materials used in the review.                                           |                                 |

From: Page MJ, McKenzie JE, Bossuyt PM, Boutron I, Hoffmann TC, Mulrow CD, et al. The PRISMA 2020 statement: an updated guideline for reporting systematic reviews. *BMJ* 2021;372:n71. doi: 10.1136/bmj.n71

For peer review only - <http://bmjopen.bmj.com/site/about/guidelines.xhtml>  
For more information, visit: <http://www.prisma-statement.org/>
